# Supplementary material for: Proteomic and phosphoproteomic profiling of urinary small extracellular vesicles in hepatocellular carcinoma
Source: Royal Society of Chemistry journal article supplement (doi:10.1039/d4an00660g), 2024-01-01
Supplement: d4an00660g2.zip [file d4an00660g2.zip]

## Sheet: Sheet1
Protein IDs	Majority protein IDs	Peptide counts (all)	Peptide counts (razor+unique)	Peptide counts (unique)	Protein names	Gene names	Fasta headers	Number of proteins	Peptides	Razor + unique peptides	Unique peptides	Peptides HCC_sEV_1	Peptides HCC_sEV_2	Peptides HCC_sEV_3	Peptides NC_sEV_1	Peptides NC_sEV_2	Peptides NC_sEV_3	Razor + unique peptides HCC_sEV_1	Razor + unique peptides HCC_sEV_2	Razor + unique peptides HCC_sEV_3	Razor + unique peptides NC_sEV_1	Razor + unique peptides NC_sEV_2	Razor + unique peptides NC_sEV_3	Unique peptides HCC_sEV_1	Unique peptides HCC_sEV_2	Unique peptides HCC_sEV_3	Unique peptides NC_sEV_1	Unique peptides NC_sEV_2	Unique peptides NC_sEV_3	Sequence coverage [%]	Unique + razor sequence coverage [%]	Unique sequence coverage [%]	Mol. weight [kDa]	Sequence length	Sequence lengths	Q-value	Score	Identification type HCC_sEV_1	Identification type HCC_sEV_2	Identification type HCC_sEV_3	Identification type NC_sEV_1	Identification type NC_sEV_2	Identification type NC_sEV_3	Sequence coverage HCC_sEV_1 [%]	Sequence coverage HCC_sEV_2 [%]	Sequence coverage HCC_sEV_3 [%]	Sequence coverage NC_sEV_1 [%]	Sequence coverage NC_sEV_2 [%]	Sequence coverage NC_sEV_3 [%]
A0A024RBG1;Q96G61;Q8NFP7;Q9NZJ9	A0A024RBG1;Q96G61;Q8NFP7;Q9NZJ9	2;2;2;2	2;2;2;2	2;2;2;2	Diphosphoinositol polyphosphate phosphohydrolase 3-beta;Diphosphoinositol polyphosphate phosphohydrolase 3-alpha;Diphosphoinositol polyphosphate phosphohydrolase 2	NUDT4;NUDT11;NUDT10	sp|A0A024RBG1|NUD4B_HUMAN Diphosphoinositol polyphosphate phosphohydrolase NUDT4B OS=Homo sapiens OX=9606 GN=NUDT4B PE=3 SV=1;sp|Q96G61|NUD11_HUMAN Diphosphoinositol polyphosphate phosphohydrolase 3-beta OS=Homo sapiens OX=9606 GN=NUDT11 PE=1 SV=1;sp|Q8NFP	4	2	2	2	2	1	1	2	2	2	2	1	1	2	2	2	2	1	1	2	2	2	9.9	9.9	9.9	20.434	181	181;164;164;180	0.00085837	4.1406	By MS/MS	By MS/MS	By MS/MS	By MS/MS	By MS/MS	By MS/MS	9.9	5	5	9.9	9.9	9.9
A0A075B6P5;P01615;A0A087WW87;P01614	A0A075B6P5;P01615;A0A087WW87;P01614	2;2;1;1	2;2;1;1	2;2;1;1	Ig kappa chain V-II region FR;Ig kappa chain V-II region Cum	IGKV2D-28;IGKV2-40	sp|A0A075B6P5|KV228_HUMAN Immunoglobulin kappa variable 2-28 OS=Homo sapiens OX=9606 GN=IGKV2-28 PE=3 SV=1;sp|P01615|KVD28_HUMAN Immunoglobulin kappa variable 2D-28 OS=Homo sapiens OX=9606 GN=IGKV2D-28 PE=1 SV=2;sp|A0A087WW87|KV240_HUMAN Immunoglobulin kap	4	2	2	2	2	2	2	2	1	1	2	2	2	2	1	1	2	2	2	2	1	1	29.2	29.2	29.2	12.957	120	120;120;121;121	0	6.8414	By MS/MS	By MS/MS	By MS/MS	By MS/MS	By MS/MS	By MS/MS	29.2	29.2	29.2	29.2	16.7	16.7
P0DP08;A0A075B6R2;P0DP07;P0DP06;A0A0C4DH41;A0A087WSY4;P01825;P06331;P01824	P0DP08;A0A075B6R2;P0DP07;P0DP06;A0A0C4DH41;A0A087WSY4;P01825;P06331;P01824	1;1;1;1;1;1;1;1;1	1;1;1;1;1;1;1;1;1	1;1;1;1;1;1;1;1;1	Ig heavy chain V-II region NEWM;Ig heavy chain V-II region ARH-77;Ig heavy chain V-II region WAH	IGHV4-4;IGHV4-61;IGHV4-31	sp|P0DP08|HVD82_HUMAN Immunoglobulin heavy variable 4-38-2 OS=Homo sapiens OX=9606 GN=IGHV4-38-2 PE=3 SV=1;sp|A0A075B6R2|HV404_HUMAN Immunoglobulin heavy variable 4-4 OS=Homo sapiens OX=9606 GN=IGHV4-4 PE=3 SV=2;sp|P0DP07|HV431_HUMAN Immunoglobulin heavy v	9	1	1	1	1	1	0	1	1	1	1	1	0	1	1	1	1	1	0	1	1	1	13.7	13.7	13.7	13.016	117	117;117;118;118;118;118;116;123;125	0	13.264	By MS/MS	By matching		By MS/MS	By MS/MS	By MS/MS	13.7	13.7	0	13.7	13.7	13.7
A0A0A0MRZ8;P04433	A0A0A0MRZ8;P04433	1;1	1;1	1;1	Ig kappa chain V-III region VG	IGKV3D-11	sp|A0A0A0MRZ8|KVD11_HUMAN Immunoglobulin kappa variable 3D-11 OS=Homo sapiens OX=9606 GN=IGKV3D-11 PE=3 SV=6;sp|P04433|KV311_HUMAN Immunoglobulin kappa variable 3-11 OS=Homo sapiens OX=9606 GN=IGKV3-11 PE=1 SV=1	2	1	1	1	1	1	1	1	1	1	1	1	1	1	1	1	1	1	1	1	1	1	7.8	7.8	7.8	12.625	115	115;115	0.0021986	2.1314	By matching	By matching	By MS/MS	By MS/MS	By matching	By MS/MS	7.8	7.8	7.8	7.8	7.8	7.8
A0A0A0MS15	A0A0A0MS15	2	1	1		IGHV3-49	sp|A0A0A0MS15|HV349_HUMAN Immunoglobulin heavy variable 3-49 OS=Homo sapiens OX=9606 GN=IGHV3-49 PE=3 SV=1	1	2	1	1	2	2	2	2	1	0	1	1	1	1	0	0	1	1	1	1	0	0	16.8	9.2	9.2	13.056	119	119	0.002908	2.0722	By MS/MS	By matching	By MS/MS	By MS/MS	By matching		16.8	16.8	16.8	16.8	7.6	0
A0A0B4J1V0	A0A0B4J1V0	4	4	2		IGHV3-15	sp|A0A0B4J1V0|HV315_HUMAN Immunoglobulin heavy variable 3-15 OS=Homo sapiens OX=9606 GN=IGHV3-15 PE=3 SV=1	1	4	4	2	3	4	4	3	4	3	3	4	4	3	4	3	1	2	2	1	2	2	33.6	33.6	20.2	12.926	119	119	0	5.0656	By MS/MS	By MS/MS	By MS/MS	By MS/MS	By MS/MS	By MS/MS	22.7	33.6	33.6	22.7	33.6	26.1
A0A0B4J1Y9;A0A0B4J1V6	A0A0B4J1Y9;A0A0B4J1V6	3;2	1;0	1;0		IGHV3-72;IGHV3-73	sp|A0A0B4J1Y9|HV372_HUMAN Immunoglobulin heavy variable 3-72 OS=Homo sapiens OX=9606 GN=IGHV3-72 PE=3 SV=1;sp|A0A0B4J1V6|HV373_HUMAN Immunoglobulin heavy variable 3-73 OS=Homo sapiens OX=9606 GN=IGHV3-73 PE=3 SV=1	2	3	1	1	3	3	3	3	3	2	1	1	1	1	1	1	1	1	1	1	1	1	22.7	9.2	9.2	13.203	119	119;119	0.00085106	4.0209	By MS/MS	By MS/MS	By MS/MS	By matching	By MS/MS	By MS/MS	22.7	22.7	22.7	22.7	22.7	15.1
P0DP01;A0A0C4DH29;A0A0B4J2H0;P01743;P01742	P0DP01;A0A0C4DH29;A0A0B4J2H0;P01743;P01742	1;1;1;1;1	1;1;1;1;1	1;1;1;1;1	Ig heavy chain V-I region HG3;Ig heavy chain V-I region EU	IGHV1-3;IGHV1-69-2	sp|P0DP01|HV108_HUMAN Immunoglobulin heavy variable 1-8 OS=Homo sapiens OX=9606 GN=IGHV1-8 PE=1 SV=1;sp|A0A0C4DH29|HV103_HUMAN Immunoglobulin heavy variable 1-3 OS=Homo sapiens OX=9606 GN=IGHV1-3 PE=3 SV=1;sp|A0A0B4J2H0|HV69D_HUMAN Immunoglobulin heavy var	5	1	1	1	1	1	1	1	1	1	1	1	1	1	1	1	1	1	1	1	1	1	9.4	9.4	9.4	12.992	117	117;117;117;117;117	0.00083893	3.7629	By MS/MS	By MS/MS	By matching	By MS/MS	By MS/MS	By MS/MS	9.4	9.4	9.4	9.4	9.4	9.4
A0A0C4DH34	A0A0C4DH34	1	1	1		IGHV4-28	sp|A0A0C4DH34|HV428_HUMAN Immunoglobulin heavy variable 4-28 OS=Homo sapiens OX=9606 GN=IGHV4-28 PE=3 SV=1	1	1	1	1	1	1	1	0	0	0	1	1	1	0	0	0	1	1	1	0	0	0	7.7	7.7	7.7	13.124	117	117	0.0071967	1.5221	By MS/MS	By matching	By MS/MS				7.7	7.7	7.7	0	0	0
A0A0J9YXX1;A0A0C4DH38	A0A0J9YXX1;A0A0C4DH38	1;1	1;1	1;1		IGHV5-51	sp|A0A0J9YXX1|HV5X1_HUMAN Immunoglobulin heavy variable 5-10-1 OS=Homo sapiens OX=9606 GN=IGHV5-10-1 PE=3 SV=1;sp|A0A0C4DH38|HV551_HUMAN Immunoglobulin heavy variable 5-51 OS=Homo sapiens OX=9606 GN=IGHV5-51 PE=3 SV=1	2	1	1	1	1	1	1	1	1	1	1	1	1	1	1	1	1	1	1	1	1	1	9.4	9.4	9.4	12.772	117	117;117	0.00083403	3.7179	By MS/MS	By matching	By MS/MS	By MS/MS	By MS/MS	By matching	9.4	9.4	9.4	9.4	9.4	9.4
A0A0C4DH55;A0A075B6H7;P01624	A0A0C4DH55;A0A075B6H7;P01624	2;1;1	2;1;1	2;1;1	Ig kappa chain V-III region POM	IGKV3D-7;IGKV3-7	sp|A0A0C4DH55|KVD07_HUMAN Immunoglobulin kappa variable 3D-7 OS=Homo sapiens OX=9606 GN=IGKV3D-7 PE=3 SV=5;sp|A0A075B6H7|KV37_HUMAN Probable non-functional immunoglobulin kappa variable 3-7 OS=Homo sapiens OX=9606 GN=IGKV3-7 PE=1 SV=1;sp|P01624|KV315_HUMAN	3	2	2	2	1	1	2	2	2	1	1	1	2	2	2	1	1	1	2	2	2	1	21	21	21	13.148	119	119;116;115	0.0032362	2.0108	By MS/MS	By MS/MS	By MS/MS	By MS/MS	By MS/MS	By MS/MS	7.6	7.6	21	21	21	7.6
A0A1B0GUS4;P68036	A0A1B0GUS4;P68036	3;3	3;3	3;3	Ubiquitin-conjugating enzyme E2 L3	UBE2L3	sp|A0A1B0GUS4|UB2L5_HUMAN Ubiquitin-conjugating enzyme E2 L5 OS=Homo sapiens OX=9606 GN=UBE2L5 PE=2 SV=1;sp|P68036|UB2L3_HUMAN Ubiquitin-conjugating enzyme E2 L3 OS=Homo sapiens OX=9606 GN=UBE2L3 PE=1 SV=1	2	3	3	3	3	3	3	3	3	2	3	3	3	3	3	2	3	3	3	3	3	2	19.5	19.5	19.5	17.875	154	154;154	0	5.685	By MS/MS	By MS/MS	By MS/MS	By MS/MS	By MS/MS	By MS/MS	19.5	19.5	19.5	19.5	19.5	14.9
A0A1B0GV96	A0A1B0GV96	3	3	3			sp|A0A1B0GV96|CHD9N_HUMAN CHD9 neighbor protein OS=Homo sapiens OX=9606 GN=CHD9NB PE=4 SV=1	1	3	3	3	3	2	3	3	3	3	3	2	3	3	3	3	3	2	3	3	3	3	61.5	61.5	61.5	5.4889	52	52	0	64.611	By MS/MS	By MS/MS	By MS/MS	By MS/MS	By MS/MS	By MS/MS	61.5	42.3	61.5	61.5	61.5	61.5
A0A8I5KQE6;P08865	A0A8I5KQE6;P08865	4;4	4;4	4;4	40S ribosomal protein SA	RPSA	sp|A0A8I5KQE6|RPSA2_HUMAN 40S ribosomal protein SA OS=Homo sapiens OX=9606 GN=RPSA2 PE=3 SV=1;sp|P08865|RSSA_HUMAN 40S ribosomal protein SA OS=Homo sapiens OX=9606 GN=RPSA PE=1 SV=4	2	4	4	4	4	4	4	4	3	4	4	4	4	4	3	4	4	4	4	4	3	4	22	22	22	32.909	295	295;295	0	25.126	By MS/MS	By MS/MS	By MS/MS	By MS/MS	By MS/MS	By MS/MS	22	22	22	22	16.3	22
A0AVT1	A0AVT1	9	9	9	Ubiquitin-like modifier-activating enzyme 6	UBA6	sp|A0AVT1|UBA6_HUMAN Ubiquitin-like modifier-activating enzyme 6 OS=Homo sapiens OX=9606 GN=UBA6 PE=1 SV=1	1	9	9	9	8	8	9	5	6	7	8	8	9	5	6	7	8	8	9	5	6	7	10.6	10.6	10.6	117.97	1052	1052	0	17.199	By MS/MS	By MS/MS	By MS/MS	By MS/MS	By MS/MS	By MS/MS	9.7	9.7	10.6	5.9	7.1	8.7
A0MZ66	A0MZ66	12	12	12	Shootin-1	KIAA1598	sp|A0MZ66|SHOT1_HUMAN Shootin-1 OS=Homo sapiens OX=9606 GN=SHTN1 PE=1 SV=4	1	12	12	12	10	8	11	7	10	10	10	8	11	7	10	10	10	8	11	7	10	10	22	22	22	71.639	631	631	0	33.957	By MS/MS	By MS/MS	By MS/MS	By MS/MS	By MS/MS	By MS/MS	18.7	15.1	20.4	12.4	19	20.4
A0PJK1	A0PJK1	3	3	3	Sodium/glucose cotransporter 5	SLC5A10	sp|A0PJK1|SC5AA_HUMAN Sodium/mannose cotransporter SLC5A10 OS=Homo sapiens OX=9606 GN=SLC5A10 PE=1 SV=2	1	3	3	3	3	3	3	3	3	3	3	3	3	3	3	3	3	3	3	3	3	3	7	7	7	64.342	596	596	0	16.249	By MS/MS	By MS/MS	By MS/MS	By MS/MS	By MS/MS	By MS/MS	7	7	7	7	7	7
A1A5C7	A1A5C7	2	2	2	Solute carrier family 22 member 23	SLC22A23	sp|A1A5C7|S22AN_HUMAN Solute carrier family 22 member 23 OS=Homo sapiens OX=9606 GN=SLC22A23 PE=1 SV=2	1	2	2	2	2	2	2	1	2	2	2	2	2	1	2	2	2	2	2	1	2	2	3.2	3.2	3.2	73.747	686	686	0.0035537	1.9099	By MS/MS	By MS/MS	By MS/MS	By matching	By MS/MS	By MS/MS	3.2	3.2	3.2	2	3.2	3.2
A1IGU5	A1IGU5	5	5	5	Rho guanine nucleotide exchange factor 37	ARHGEF37	sp|A1IGU5|ARH37_HUMAN Rho guanine nucleotide exchange factor 37 OS=Homo sapiens OX=9606 GN=ARHGEF37 PE=2 SV=2	1	5	5	5	5	4	5	5	3	5	5	4	5	5	3	5	5	4	5	5	3	5	8.6	8.6	8.6	76.277	675	675	0	10.123	By MS/MS	By MS/MS	By MS/MS	By MS/MS	By MS/MS	By MS/MS	8.6	6.4	8.6	8.6	5	8.6
A2NJV5;A0A075B6S2	A2NJV5;A0A075B6S2	2;1	2;1	2;1		IGKV A18;IGKV2D-29	sp|A2NJV5|KV229_HUMAN Immunoglobulin kappa variable 2-29 OS=Homo sapiens OX=9606 GN=IGKV2-29 PE=3 SV=2;sp|A0A075B6S2|KVD29_HUMAN Immunoglobulin kappa variable 2D-29 OS=Homo sapiens OX=9606 GN=IGKV2D-29 PE=3 SV=1	2	2	2	2	2	1	1	0	0	0	2	1	1	0	0	0	2	1	1	0	0	0	21.7	21.7	21.7	13.085	120	120;120	0	8.443	By MS/MS	By matching	By MS/MS				21.7	12.5	12.5	0	0	0
A4D1P6	A4D1P6	11	11	11	WD repeat-containing protein 91	WDR91	sp|A4D1P6|WDR91_HUMAN WD repeat-containing protein 91 OS=Homo sapiens OX=9606 GN=WDR91 PE=1 SV=2	1	11	11	11	11	10	11	3	3	5	11	10	11	3	3	5	11	10	11	3	3	5	19	19	19	83.343	747	747	0	65.085	By MS/MS	By MS/MS	By MS/MS	By matching	By MS/MS	By MS/MS	19	17.5	19	6.6	4.1	9.6
A4D1S5	A4D1S5	4	3	3	Ras-related protein Rab-19	RAB19	sp|A4D1S5|RAB19_HUMAN Ras-related protein Rab-19 OS=Homo sapiens OX=9606 GN=RAB19 PE=1 SV=2	1	4	3	3	4	4	3	3	4	4	3	3	2	3	3	3	3	3	2	3	3	3	19.4	15.7	15.7	24.4	217	217	0	5.4225	By MS/MS	By MS/MS	By MS/MS	By MS/MS	By MS/MS	By MS/MS	19.4	19.4	14.3	15.7	19.4	19.4
A5D8V6	A5D8V6	4	4	4	Vacuolar protein sorting-associated protein 37C	VPS37C	sp|A5D8V6|VP37C_HUMAN Vacuolar protein sorting-associated protein 37C OS=Homo sapiens OX=9606 GN=VPS37C PE=1 SV=2	1	4	4	4	4	4	4	4	4	4	4	4	4	4	4	4	4	4	4	4	4	4	10.7	10.7	10.7	38.658	355	355	0	13.35	By MS/MS	By MS/MS	By MS/MS	By MS/MS	By MS/MS	By MS/MS	10.7	10.7	10.7	10.7	10.7	10.7
A6NCE7;Q9GZQ8;Q9H492	A6NCE7;Q9GZQ8;Q9H492	2;2;1	2;2;1	2;2;1	Microtubule-associated proteins 1A/1B light chain 3 beta 2;Microtubule-associated proteins 1A/1B light chain 3B;Microtubule-associated proteins 1A/1B light chain 3A	MAP1LC3B2;MAP1LC3B;MAP1LC3A	sp|A6NCE7|MP3B2_HUMAN Microtubule-associated proteins 1A/1B light chain 3 beta 2 OS=Homo sapiens OX=9606 GN=MAP1LC3B2 PE=1 SV=1;sp|Q9GZQ8|MLP3B_HUMAN Microtubule-associated proteins 1A/1B light chain 3B OS=Homo sapiens OX=9606 GN=MAP1LC3B PE=1 SV=3;sp|Q9H4	3	2	2	2	2	2	2	1	1	2	2	2	2	1	1	2	2	2	2	1	1	2	13.6	13.6	13.6	14.628	125	125;125;121	0.0011295	2.4294	By MS/MS	By MS/MS	By MS/MS	By MS/MS	By MS/MS	By MS/MS	13.6	13.6	13.6	5.6	5.6	13.6
A6ND91	A6ND91	2	2	2	Putative L-aspartate dehydrogenase	ASPDH	sp|A6ND91|ASPDH_HUMAN Aspartate dehydrogenase domain-containing protein OS=Homo sapiens OX=9606 GN=ASPDH PE=1 SV=2	1	2	2	2	2	2	2	2	2	2	2	2	2	2	2	2	2	2	2	2	2	2	10.6	10.6	10.6	29.946	283	283	0	11.053	By MS/MS	By MS/MS	By MS/MS	By MS/MS	By MS/MS	By MS/MS	10.6	10.6	10.6	10.6	10.6	10.6
A6NDB9	A6NDB9	4	4	4	Paralemmin-3	PALM3	sp|A6NDB9|PALM3_HUMAN Paralemmin-3 OS=Homo sapiens OX=9606 GN=PALM3 PE=1 SV=2	1	4	4	4	3	4	3	3	4	4	3	4	3	3	4	4	3	4	3	3	4	4	7.7	7.7	7.7	71.695	673	673	0	27.396	By MS/MS	By MS/MS	By MS/MS	By MS/MS	By MS/MS	By MS/MS	5.9	7.7	5.9	5.9	7.7	7.7
A6NDG6	A6NDG6	2	2	2	Phosphoglycolate phosphatase	PGP	sp|A6NDG6|PGP_HUMAN Glycerol-3-phosphate phosphatase OS=Homo sapiens OX=9606 GN=PGP PE=1 SV=1	1	2	2	2	2	2	1	2	2	2	2	2	1	2	2	2	2	2	1	2	2	2	7.8	7.8	7.8	34.006	321	321	0.0011632	2.7476	By MS/MS	By MS/MS	By MS/MS	By MS/MS	By MS/MS	By MS/MS	7.8	7.8	4.7	7.8	7.8	7.8
A6NGS2	A6NGS2	1	1	1	Glutamate-rich protein 4	ERICH4	sp|A6NGS2|ERIC4_HUMAN Glutamate-rich protein 4 OS=Homo sapiens OX=9606 GN=ERICH4 PE=1 SV=2	1	1	1	1	1	1	1	0	0	0	1	1	1	0	0	0	1	1	1	0	0	0	10	10	10	14.477	130	130	0.000818	3.5059	By MS/MS	By MS/MS	By MS/MS				10	10	10	0	0	0
P30046;A6NHG4	P30046;A6NHG4	1;1	1;1	1;1	D-dopachrome decarboxylase;D-dopachrome decarboxylase-like protein	DDT;DDTL	sp|P30046|DOPD_HUMAN D-dopachrome decarboxylase OS=Homo sapiens OX=9606 GN=DDT PE=1 SV=3;sp|A6NHG4|DDTL_HUMAN D-dopachrome decarboxylase-like protein OS=Homo sapiens OX=9606 GN=DDTL PE=2 SV=1	2	1	1	1	1	1	1	1	1	1	1	1	1	1	1	1	1	1	1	1	1	1	16.9	16.9	16.9	12.712	118	118;134	0	59.646	By MS/MS	By MS/MS	By MS/MS	By MS/MS	By MS/MS	By MS/MS	16.9	16.9	16.9	16.9	16.9	16.9
A6NHJ4	A6NHJ4	1	1	1	Zinc finger protein 860	ZNF860	sp|A6NHJ4|ZN860_HUMAN Zinc finger protein 860 OS=Homo sapiens OX=9606 GN=ZNF860 PE=1 SV=3	1	1	1	1	1	1	1	1	0	0	1	1	1	1	0	0	1	1	1	1	0	0	1.4	1.4	1.4	73.756	632	632	1	-2	By MS/MS	By MS/MS	By MS/MS	By MS/MS			1.4	1.4	1.4	1.4	0	0
A8MQ03	A8MQ03	1	1	1	Cysteine-rich tail protein 1	CYSRT1	sp|A8MQ03|CRTP1_HUMAN Cysteine-rich tail protein 1 OS=Homo sapiens OX=9606 GN=CYSRT1 PE=1 SV=1	1	1	1	1	1	1	1	1	1	1	1	1	1	1	1	1	1	1	1	1	1	1	6.9	6.9	6.9	15.313	144	144	0.00079681	3.1284	By MS/MS	By MS/MS	By MS/MS	By MS/MS	By MS/MS	By MS/MS	6.9	6.9	6.9	6.9	6.9	6.9
E5RIL1;B0FP48	E5RIL1;B0FP48	4;4	4;4	4;4	Uroplakin-3b-like protein	UPK3BL	sp|E5RIL1|UPKL2_HUMAN Uroplakin-3b-like protein 2 OS=Homo sapiens OX=9606 GN=UPK3BL2 PE=3 SV=2;sp|B0FP48|UPK3L_HUMAN Uroplakin-3b-like protein 1 OS=Homo sapiens OX=9606 GN=UPK3BL1 PE=2 SV=1	2	4	4	4	3	3	3	4	4	4	3	3	3	4	4	4	3	3	3	4	4	4	16.7	16.7	16.7	28.385	263	263;263	0	12.975	By MS/MS	By MS/MS	By matching	By MS/MS	By MS/MS	By MS/MS	11	14.1	14.1	16.7	16.7	16.7
B1AK53	B1AK53	3	3	3	Espin	ESPN	sp|B1AK53|ESPN_HUMAN Espin OS=Homo sapiens OX=9606 GN=ESPN PE=1 SV=1	1	3	3	3	1	3	3	0	2	1	1	3	3	0	2	1	1	3	3	0	2	1	3.9	3.9	3.9	91.732	854	854	0	4.8941	By MS/MS	By MS/MS	By MS/MS		By MS/MS	By MS/MS	1.2	3.9	3.9	0	2.3	1.2
B2RUZ4	B2RUZ4	2	2	2	Small integral membrane protein 1	SMIM1	sp|B2RUZ4|SMIM1_HUMAN Small integral membrane protein 1 OS=Homo sapiens OX=9606 GN=SMIM1 PE=1 SV=1	1	2	2	2	2	2	2	2	2	2	2	2	2	2	2	2	2	2	2	2	2	2	43.6	43.6	43.6	8.749	78	78	0.0008569	4.1159	By MS/MS	By MS/MS	By MS/MS	By MS/MS	By MS/MS	By MS/MS	43.6	43.6	43.6	43.6	43.6	43.6
P0DOX8;P0CG04;B9A064	P0DOX8;P0CG04;B9A064	5;5;5	5;5;5	3;3;3	Ig lambda-1 chain C regions;Immunoglobulin lambda-like polypeptide 5	IGLC1;IGLL5	sp|P0DOX8|IGL1_HUMAN Immunoglobulin lambda-1 light chain OS=Homo sapiens OX=9606 PE=1 SV=1;sp|P0CG04|IGLC1_HUMAN Immunoglobulin lambda constant 1 OS=Homo sapiens OX=9606 GN=IGLC1 PE=1 SV=1;sp|B9A064|IGLL5_HUMAN Immunoglobulin lambda-like polypeptide 5 OS=H	3	5	5	3	5	4	4	3	5	5	5	4	4	3	5	5	3	2	2	1	3	3	27.3	27.3	13.4	22.83	216	216;106;214	0	173.72	By MS/MS	By MS/MS	By MS/MS	By MS/MS	By MS/MS	By MS/MS	27.3	25.9	27.3	22.7	27.3	27.3
C4AMC7;Q6VEQ5;Q9NQA3;A8K0Z3;A8MWX3	C4AMC7;Q6VEQ5;Q9NQA3;A8K0Z3;A8MWX3	6;6;5;4;4	6;6;5;4;4	6;6;5;4;4	Putative WAS protein family homolog 3;WAS protein family homolog 2;WAS protein family homolog 6;WAS protein family homolog 1;Putative WAS protein family homolog 4	WASH3P;WASH2P;WASH6P;WASH1;WASH4P	sp|C4AMC7|WASH3_HUMAN Putative WAS protein family homolog 3 OS=Homo sapiens OX=9606 GN=WASH3P PE=1 SV=2;sp|Q6VEQ5|WASH2_HUMAN WAS protein family homolog 2 OS=Homo sapiens OX=9606 GN=WASH2P PE=2 SV=2;sp|Q9NQA3|WASH6_HUMAN WAS protein family homolog 6 OS=Hom	5	6	6	6	6	3	5	2	1	1	6	3	5	2	1	1	6	3	5	2	1	1	12.3	12.3	12.3	49.994	463	463;465;447;465;477	0	13.93	By MS/MS	By MS/MS	By MS/MS	By MS/MS	By MS/MS	By MS/MS	12.3	7.1	10.4	5.4	2.8	2.8
O43374;C9J798	O43374;C9J798	3;3	3;3	3;3	Ras GTPase-activating protein 4;Putative Ras GTPase-activating protein 4B	RASA4;RASA4B	sp|O43374|RASL2_HUMAN Ras GTPase-activating protein 4 OS=Homo sapiens OX=9606 GN=RASA4 PE=2 SV=2;sp|C9J798|RAS4B_HUMAN Ras GTPase-activating protein 4B OS=Homo sapiens OX=9606 GN=RASA4B PE=3 SV=2	2	3	3	3	1	1	1	2	2	1	1	1	1	2	2	1	1	1	1	2	2	1	3.9	3.9	3.9	90.457	803	803;803	0	6.79	By MS/MS	By matching	By MS/MS	By MS/MS	By MS/MS	By MS/MS	1.1	1.1	1.7	2.1	2.1	1.1
C9J7I0	C9J7I0	3	3	3	UBAP1-MVB12-associated (UMA)-domain containing protein 1	UMAD1	sp|C9J7I0|UMAD1_HUMAN UBAP1-MVB12-associated (UMA)-domain containing protein 1 OS=Homo sapiens OX=9606 GN=UMAD1 PE=1 SV=2	1	3	3	3	3	3	3	2	3	3	3	3	3	2	3	3	3	3	3	2	3	3	38.7	38.7	38.7	15.2	137	137	0	100.01	By MS/MS	By MS/MS	By MS/MS	By MS/MS	By MS/MS	By MS/MS	38.7	38.7	38.7	27	38.7	38.7
C9JI98	C9JI98	1	1	1	Transmembrane protein 238	TMEM238	sp|C9JI98|TM238_HUMAN Transmembrane protein 238 OS=Homo sapiens OX=9606 GN=TMEM238 PE=1 SV=1	1	1	1	1	1	0	1	0	1	1	1	0	1	0	1	1	1	0	1	0	1	1	10.2	10.2	10.2	18.04	176	176	0.00083717	3.7447	By matching		By matching		By matching	By MS/MS	10.2	0	10.2	0	10.2	10.2
Q13765;E9PAV3	Q13765;E9PAV3	1;1	1;1	1;1	Nascent polypeptide-associated complex subunit alpha;Nascent polypeptide-associated complex subunit alpha, muscle-specific form	NACA	sp|Q13765|NACA_HUMAN Nascent polypeptide-associated complex subunit alpha OS=Homo sapiens OX=9606 GN=NACA PE=1 SV=1;sp|E9PAV3|NACAM_HUMAN Nascent polypeptide-associated complex subunit alpha, muscle-specific form OS=Homo sapiens OX=9606 GN=NACA PE=1 SV=1	2	1	1	1	0	1	1	1	0	1	0	1	1	1	0	1	0	1	1	1	0	1	7	7	7	23.384	215	215;2078	0	24.783		By matching	By MS/MS	By MS/MS		By MS/MS	0	7	7	7	0	7
O00115	O00115	2	2	2	Deoxyribonuclease-2-alpha	DNASE2	sp|O00115|DNS2A_HUMAN Deoxyribonuclease-2-alpha OS=Homo sapiens OX=9606 GN=DNASE2 PE=1 SV=2	1	2	2	2	1	2	2	1	1	1	1	2	2	1	1	1	1	2	2	1	1	1	6.4	6.4	6.4	39.58	360	360	0.00085763	4.1232	By MS/MS	By MS/MS	By MS/MS	By matching	By MS/MS	By matching	3.1	6.4	6.4	3.3	3.1	3.3
O00139	O00139	4	4	4	Kinesin-like protein KIF2A	KIF2A	sp|O00139|KIF2A_HUMAN Kinesin-like protein KIF2A OS=Homo sapiens OX=9606 GN=KIF2A PE=1 SV=3	1	4	4	4	2	1	2	1	3	4	2	1	2	1	3	4	2	1	2	1	3	4	5.5	5.5	5.5	79.954	706	706	0	7.4588	By MS/MS	By MS/MS	By MS/MS	By MS/MS	By MS/MS	By MS/MS	3	1.6	3	1.6	4	5.5
O00151	O00151	6	6	6	PDZ and LIM domain protein 1	PDLIM1	sp|O00151|PDLI1_HUMAN PDZ and LIM domain protein 1 OS=Homo sapiens OX=9606 GN=PDLIM1 PE=1 SV=4	1	6	6	6	2	3	2	6	6	5	2	3	2	6	6	5	2	3	2	6	6	5	26.7	26.7	26.7	36.071	329	329	0	17.846	By MS/MS	By MS/MS	By MS/MS	By MS/MS	By MS/MS	By MS/MS	7	9.4	7	26.7	26.7	23.7
O00159	O00159	44	44	43	Unconventional myosin-Ic	MYO1C	sp|O00159|MYO1C_HUMAN Unconventional myosin-Ic OS=Homo sapiens OX=9606 GN=MYO1C PE=1 SV=4	1	44	44	43	43	40	41	42	44	43	43	40	41	42	44	43	42	39	40	41	43	42	41.6	41.6	40.9	121.68	1063	1063	0	323.31	By MS/MS	By MS/MS	By MS/MS	By MS/MS	By MS/MS	By MS/MS	40.8	38.6	39.1	40.2	41.6	40.8
O00161	O00161	12	12	12	Synaptosomal-associated protein 23	SNAP23	sp|O00161|SNP23_HUMAN Synaptosomal-associated protein 23 OS=Homo sapiens OX=9606 GN=SNAP23 PE=1 SV=1	1	12	12	12	12	12	12	12	11	12	12	12	12	12	11	12	12	12	12	12	11	12	56.9	56.9	56.9	23.354	211	211	0	202.17	By MS/MS	By MS/MS	By MS/MS	By MS/MS	By MS/MS	By MS/MS	56.9	56.9	56.9	56.9	53.6	56.9
O00170	O00170	3	3	3	AH receptor-interacting protein	AIP	sp|O00170|AIP_HUMAN AH receptor-interacting protein OS=Homo sapiens OX=9606 GN=AIP PE=1 SV=3	1	3	3	3	2	3	2	3	3	3	2	3	2	3	3	3	2	3	2	3	3	3	13.9	13.9	13.9	37.664	330	330	0	5.8648	By MS/MS	By MS/MS	By MS/MS	By MS/MS	By MS/MS	By MS/MS	9.4	13.9	9.4	13.9	13.9	13.9
O00178	O00178	1	1	1	GTP-binding protein 1	GTPBP1	sp|O00178|GTPB1_HUMAN GTP-binding protein 1 OS=Homo sapiens OX=9606 GN=GTPBP1 PE=1 SV=3	1	1	1	1	1	1	1	0	1	1	1	1	1	0	1	1	1	1	1	0	1	1	2.4	2.4	2.4	72.453	669	669	0.0029144	2.083	By matching	By MS/MS	By MS/MS		By MS/MS	By MS/MS	2.4	2.4	2.4	0	2.4	2.4
O00182;Q6DKI2;Q3B8N2	O00182;Q6DKI2;Q3B8N2	3;2;2	3;2;2	3;2;2	Galectin-9;Galectin-9C;Galectin-9B	LGALS9;LGALS9C;LGALS9B	sp|O00182|LEG9_HUMAN Galectin-9 OS=Homo sapiens OX=9606 GN=LGALS9 PE=1 SV=2;sp|Q6DKI2|LEG9C_HUMAN Galectin-9C OS=Homo sapiens OX=9606 GN=LGALS9C PE=1 SV=2;sp|Q3B8N2|LEG9B_HUMAN Galectin-9B OS=Homo sapiens OX=9606 GN=LGALS9B PE=1 SV=3	3	3	3	3	1	3	1	3	2	3	1	3	1	3	2	3	1	3	1	3	2	3	9.3	9.3	9.3	39.518	355	355;356;356	0	29.1	By MS/MS	By MS/MS	By MS/MS	By MS/MS	By MS/MS	By MS/MS	3.4	9.3	3.4	9.3	7	9.3
O00186	O00186	13	13	13	Syntaxin-binding protein 3	STXBP3	sp|O00186|STXB3_HUMAN Syntaxin-binding protein 3 OS=Homo sapiens OX=9606 GN=STXBP3 PE=1 SV=2	1	13	13	13	10	11	11	11	12	11	10	11	11	11	12	11	10	11	11	11	12	11	24	24	24	67.764	592	592	0	40.471	By MS/MS	By MS/MS	By MS/MS	By MS/MS	By MS/MS	By MS/MS	18.1	19.6	20.6	20.6	22.8	20.9
O00187	O00187	8	8	8	Mannan-binding lectin serine protease 2;Mannan-binding lectin serine protease 2 A chain;Mannan-binding lectin serine protease 2 B chain	MASP2	sp|O00187|MASP2_HUMAN Mannan-binding lectin serine protease 2 OS=Homo sapiens OX=9606 GN=MASP2 PE=1 SV=4	1	8	8	8	8	8	8	8	8	8	8	8	8	8	8	8	8	8	8	8	8	8	9.9	9.9	9.9	75.702	686	686	0	85.529	By MS/MS	By MS/MS	By MS/MS	By MS/MS	By MS/MS	By MS/MS	9.9	9.9	9.9	9.9	9.9	9.9
O00194	O00194	9	7	7	Ras-related protein Rab-27B	RAB27B	sp|O00194|RB27B_HUMAN Ras-related protein Rab-27B OS=Homo sapiens OX=9606 GN=RAB27B PE=1 SV=4	1	9	7	7	9	9	9	9	9	9	7	7	7	7	7	7	7	7	7	7	7	7	38.5	33	33	24.608	218	218	0	28.98	By MS/MS	By MS/MS	By MS/MS	By MS/MS	By MS/MS	By MS/MS	38.5	38.5	38.5	38.5	38.5	38.5
O00203	O00203	4	4	4	AP-3 complex subunit beta-1	AP3B1	sp|O00203|AP3B1_HUMAN AP-3 complex subunit beta-1 OS=Homo sapiens OX=9606 GN=AP3B1 PE=1 SV=3	1	4	4	4	4	3	3	3	3	3	4	3	3	3	3	3	4	3	3	3	3	3	3.7	3.7	3.7	121.32	1094	1094	0	7.5298	By MS/MS	By MS/MS	By MS/MS	By MS/MS	By MS/MS	By MS/MS	3.7	2.7	2.7	2.7	2.7	2.7
O00204	O00204	5	5	5	Sulfotransferase family cytosolic 2B member 1	SULT2B1	sp|O00204|ST2B1_HUMAN Sulfotransferase 2B1 OS=Homo sapiens OX=9606 GN=SULT2B1 PE=1 SV=2	1	5	5	5	4	4	5	4	4	3	4	4	5	4	4	3	4	4	5	4	4	3	17.3	17.3	17.3	41.307	365	365	0	18.728	By MS/MS	By MS/MS	By MS/MS	By MS/MS	By MS/MS	By MS/MS	14.5	14.5	17.3	14.5	14.5	11
O00212	O00212	2	2	2	Rho-related GTP-binding protein RhoD	RHOD	sp|O00212|RHOD_HUMAN Rho-related GTP-binding protein RhoD OS=Homo sapiens OX=9606 GN=RHOD PE=1 SV=3	1	2	2	2	2	2	1	2	2	2	2	2	1	2	2	2	2	2	1	2	2	2	10	10	10	23.466	210	210	0	6.7136	By MS/MS	By MS/MS	By MS/MS	By MS/MS	By MS/MS	By MS/MS	10	10	3.8	10	10	10
O00214	O00214	7	7	7	Galectin-8	LGALS8	sp|O00214|LEG8_HUMAN Galectin-8 OS=Homo sapiens OX=9606 GN=LGALS8 PE=1 SV=4	1	7	7	7	4	5	6	6	4	5	4	5	6	6	4	5	4	5	6	6	4	5	23	23	23	35.808	317	317	0	12.788	By MS/MS	By MS/MS	By MS/MS	By MS/MS	By MS/MS	By MS/MS	12	14.8	18.9	18.9	13.2	16.1
O00231	O00231	11	11	11	26S proteasome non-ATPase regulatory subunit 11	PSMD11	sp|O00231|PSD11_HUMAN 26S proteasome non-ATPase regulatory subunit 11 OS=Homo sapiens OX=9606 GN=PSMD11 PE=1 SV=3	1	11	11	11	11	11	10	8	11	11	11	11	10	8	11	11	11	11	10	8	11	11	32.2	32.2	32.2	47.463	422	422	0	33.25	By MS/MS	By MS/MS	By MS/MS	By MS/MS	By MS/MS	By MS/MS	32.2	32.2	29.4	22.5	32.2	32.2
O00232	O00232	4	4	4	26S proteasome non-ATPase regulatory subunit 12	PSMD12	sp|O00232|PSD12_HUMAN 26S proteasome non-ATPase regulatory subunit 12 OS=Homo sapiens OX=9606 GN=PSMD12 PE=1 SV=3	1	4	4	4	2	3	3	3	3	3	2	3	3	3	3	3	2	3	3	3	3	3	10.5	10.5	10.5	52.904	456	456	0	8.9875	By MS/MS	By MS/MS	By MS/MS	By MS/MS	By MS/MS	By MS/MS	5.9	8.3	8.3	8.3	8.1	8.1
O00233	O00233	6	6	6	26S proteasome non-ATPase regulatory subunit 9	PSMD9	sp|O00233|PSMD9_HUMAN 26S proteasome non-ATPase regulatory subunit 9 OS=Homo sapiens OX=9606 GN=PSMD9 PE=1 SV=3	1	6	6	6	5	6	6	5	4	5	5	6	6	5	4	5	5	6	6	5	4	5	30.9	30.9	30.9	24.682	223	223	0	61.502	By MS/MS	By MS/MS	By MS/MS	By MS/MS	By MS/MS	By MS/MS	26.9	30.9	30.9	30.9	26.5	26.9
O00244	O00244	6	6	6	Copper transport protein ATOX1	ATOX1	sp|O00244|ATOX1_HUMAN Copper transport protein ATOX1 OS=Homo sapiens OX=9606 GN=ATOX1 PE=1 SV=1	1	6	6	6	5	6	5	4	5	4	5	6	5	4	5	4	5	6	5	4	5	4	76.5	76.5	76.5	7.4016	68	68	0	34.82	By MS/MS	By MS/MS	By MS/MS	By MS/MS	By MS/MS	By MS/MS	76.5	76.5	76.5	76.5	76.5	76.5
O00273	O00273	2	2	2	DNA fragmentation factor subunit alpha	DFFA	sp|O00273|DFFA_HUMAN DNA fragmentation factor subunit alpha OS=Homo sapiens OX=9606 GN=DFFA PE=1 SV=1	1	2	2	2	1	1	2	2	1	1	1	1	2	2	1	1	1	1	2	2	1	1	7.9	7.9	7.9	36.521	331	331	0.0022026	2.1457	By MS/MS	By MS/MS	By MS/MS	By MS/MS	By MS/MS	By matching	2.7	2.7	7.9	7.9	2.7	5.1
O00299	O00299	15	15	15	Chloride intracellular channel protein 1	CLIC1	sp|O00299|CLIC1_HUMAN Chloride intracellular channel protein 1 OS=Homo sapiens OX=9606 GN=CLIC1 PE=1 SV=4	1	15	15	15	14	12	14	12	14	13	14	12	14	12	14	13	14	12	14	12	14	13	80.5	80.5	80.5	26.922	241	241	0	231.3	By MS/MS	By MS/MS	By MS/MS	By MS/MS	By MS/MS	By MS/MS	76.8	70.1	73.9	70.1	76.8	76.8
O00303	O00303	1	1	1	Eukaryotic translation initiation factor 3 subunit F	EIF3F	sp|O00303|EIF3F_HUMAN Eukaryotic translation initiation factor 3 subunit F OS=Homo sapiens OX=9606 GN=EIF3F PE=1 SV=1	1	1	1	1	0	1	0	1	1	1	0	1	0	1	1	1	0	1	0	1	1	1	3.4	3.4	3.4	37.563	357	357	0.0075265	1.5119		By MS/MS		By matching	By MS/MS	By matching	0	3.4	0	3.4	3.4	3.4
O00308	O00308	7	5	5	NEDD4-like E3 ubiquitin-protein ligase WWP2	WWP2	sp|O00308|WWP2_HUMAN NEDD4-like E3 ubiquitin-protein ligase WWP2 OS=Homo sapiens OX=9606 GN=WWP2 PE=1 SV=2	1	7	5	5	6	6	6	4	4	5	4	4	4	3	3	3	4	4	4	3	3	3	9	6.9	6.9	98.911	870	870	0	11.438	By MS/MS	By MS/MS	By MS/MS	By MS/MS	By MS/MS	By MS/MS	7	7	7.9	4.8	4.8	6
O00322	O00322	5	5	5	Uroplakin-1a	UPK1A	sp|O00322|UPK1A_HUMAN Uroplakin-1a OS=Homo sapiens OX=9606 GN=UPK1A PE=1 SV=1	1	5	5	5	5	4	4	5	5	5	5	4	4	5	5	5	5	4	4	5	5	5	24.4	24.4	24.4	28.879	258	258	0	111.81	By MS/MS	By MS/MS	By MS/MS	By MS/MS	By MS/MS	By MS/MS	24.4	20.5	20.5	24.4	24.4	24.4
O00337	O00337	3	3	3	Sodium/nucleoside cotransporter 1	SLC28A1	sp|O00337|S28A1_HUMAN Sodium/nucleoside cotransporter 1 OS=Homo sapiens OX=9606 GN=SLC28A1 PE=1 SV=2	1	3	3	3	2	2	2	2	3	1	2	2	2	2	3	1	2	2	2	2	3	1	6.9	6.9	6.9	71.583	649	649	0	18.037	By MS/MS	By MS/MS	By MS/MS	By MS/MS	By MS/MS	By matching	4.9	4.9	4.9	4.9	6.9	3.1
O00338	O00338	4	4	4	Sulfotransferase 1C2	SULT1C2	sp|O00338|ST1C2_HUMAN Sulfotransferase 1C2 OS=Homo sapiens OX=9606 GN=SULT1C2 PE=1 SV=1	1	4	4	4	4	4	4	4	4	4	4	4	4	4	4	4	4	4	4	4	4	4	12.5	12.5	12.5	34.88	296	296	0	11.437	By MS/MS	By MS/MS	By MS/MS	By MS/MS	By MS/MS	By MS/MS	12.5	12.5	12.5	12.5	12.5	12.5
O00400	O00400	1	1	1	Acetyl-coenzyme A transporter 1	SLC33A1	sp|O00400|ACATN_HUMAN Acetyl-coenzyme A transporter 1 OS=Homo sapiens OX=9606 GN=SLC33A1 PE=1 SV=1	1	1	1	1	1	1	1	0	0	0	1	1	1	0	0	0	1	1	1	0	0	0	2	2	2	60.908	549	549	0.00080128	3.1879	By matching	By MS/MS	By matching				2	2	2	0	0	0
O00401	O00401	9	9	9	Neural Wiskott-Aldrich syndrome protein	WASL	sp|O00401|WASL_HUMAN Actin nucleation-promoting factor WASL OS=Homo sapiens OX=9606 GN=WASL PE=1 SV=2	1	9	9	9	8	8	8	8	8	8	8	8	8	8	8	8	8	8	8	8	8	8	16.6	16.6	16.6	54.826	505	505	0	19.379	By MS/MS	By MS/MS	By MS/MS	By MS/MS	By MS/MS	By MS/MS	15	15	15	15	15	15
O00410	O00410	6	6	6	Importin-5	IPO5	sp|O00410|IPO5_HUMAN Importin-5 OS=Homo sapiens OX=9606 GN=IPO5 PE=1 SV=4	1	6	6	6	4	4	4	5	5	5	4	4	4	5	5	5	4	4	4	5	5	5	7.5	7.5	7.5	123.63	1097	1097	0	15.161	By MS/MS	By MS/MS	By MS/MS	By MS/MS	By MS/MS	By MS/MS	4.6	4.6	4.6	6.5	6.5	6.4
O00429	O00429	3	3	3	Dynamin-1-like protein	DNM1L	sp|O00429|DNM1L_HUMAN Dynamin-1-like protein OS=Homo sapiens OX=9606 GN=DNM1L PE=1 SV=2	1	3	3	3	3	2	2	1	1	2	3	2	2	1	1	2	3	2	2	1	1	2	4.5	4.5	4.5	81.876	736	736	0	6.4656	By MS/MS	By MS/MS	By MS/MS	By MS/MS	By MS/MS	By MS/MS	4.5	3.1	3.1	1.4	1.4	3.1
O00442	O00442	2	2	2	RNA 3-terminal phosphate cyclase	RTCA	sp|O00442|RTCA_HUMAN RNA 3-terminal phosphate cyclase OS=Homo sapiens OX=9606 GN=RTCA PE=1 SV=1	1	2	2	2	1	1	2	2	1	2	1	1	2	2	1	2	1	1	2	2	1	2	9.3	9.3	9.3	39.336	366	366	0.0014909	2.3041	By matching	By matching	By MS/MS	By MS/MS	By matching	By MS/MS	2.7	2.7	9.3	9.3	6.6	9.3
O00459;Q92569	O00459	3;1	2;0	2;0	Phosphatidylinositol 3-kinase regulatory subunit beta	PIK3R2	sp|O00459|P85B_HUMAN Phosphatidylinositol 3-kinase regulatory subunit beta OS=Homo sapiens OX=9606 GN=PIK3R2 PE=1 SV=2	2	3	2	2	3	3	3	1	2	2	2	2	2	0	1	1	2	2	2	0	1	1	4.3	2.6	2.6	81.544	728	728;461	0	5.4301	By MS/MS	By MS/MS	By MS/MS	By matching	By matching	By MS/MS	4.3	4.3	4.3	1.6	2.7	2.7
O00461	O00461	3	3	3	Golgi integral membrane protein 4	GOLIM4	sp|O00461|GOLI4_HUMAN Golgi integral membrane protein 4 OS=Homo sapiens OX=9606 GN=GOLIM4 PE=1 SV=1	1	3	3	3	2	0	0	3	2	3	2	0	0	3	2	3	2	0	0	3	2	3	5	5	5	81.879	696	696	0	7.1658	By matching			By MS/MS	By MS/MS	By MS/MS	3.2	0	0	5	3	5
O00462	O00462	2	2	2	Beta-mannosidase	MANBA	sp|O00462|MANBA_HUMAN Beta-mannosidase OS=Homo sapiens OX=9606 GN=MANBA PE=1 SV=3	1	2	2	2	1	2	2	0	0	0	1	2	2	0	0	0	1	2	2	0	0	0	2.8	2.8	2.8	100.89	879	879	0.00084175	3.8222	By MS/MS	By MS/MS	By MS/MS				1.5	2.8	2.8	0	0	0
O00468	O00468	12	12	12	Agrin;Agrin N-terminal 110 kDa subunit;Agrin C-terminal 110 kDa subunit;Agrin C-terminal 90 kDa fragment;Agrin C-terminal 22 kDa fragment	AGRN	sp|O00468|AGRIN_HUMAN Agrin OS=Homo sapiens OX=9606 GN=AGRN PE=1 SV=6	1	12	12	12	8	5	10	12	10	10	8	5	10	12	10	10	8	5	10	12	10	10	10.3	10.3	10.3	217.32	2068	2068	0	129.78	By MS/MS	By MS/MS	By MS/MS	By MS/MS	By MS/MS	By MS/MS	6.3	3.5	8.6	10.3	8.1	8.7
O00471	O00471	6	6	6	Exocyst complex component 5	EXOC5	sp|O00471|EXOC5_HUMAN Exocyst complex component 5 OS=Homo sapiens OX=9606 GN=EXOC5 PE=1 SV=1	1	6	6	6	6	5	6	5	6	5	6	5	6	5	6	5	6	5	6	5	6	5	10	10	10	81.852	708	708	0	12.499	By MS/MS	By MS/MS	By MS/MS	By MS/MS	By MS/MS	By MS/MS	10	7.6	10	8.6	10	7.6
O00476	O00476	3	3	3	Sodium-dependent phosphate transport protein 4	SLC17A3	sp|O00476|NPT4_HUMAN Sodium-dependent phosphate transport protein 4 OS=Homo sapiens OX=9606 GN=SLC17A3 PE=1 SV=2	1	3	3	3	3	3	3	3	3	3	3	3	3	3	3	3	3	3	3	3	3	3	7.1	7.1	7.1	46.106	420	420	0	33.843	By MS/MS	By MS/MS	By MS/MS	By MS/MS	By MS/MS	By MS/MS	7.1	7.1	7.1	7.1	7.1	7.1
O00487	O00487	3	3	3	26S proteasome non-ATPase regulatory subunit 14	PSMD14	sp|O00487|PSDE_HUMAN 26S proteasome non-ATPase regulatory subunit 14 OS=Homo sapiens OX=9606 GN=PSMD14 PE=1 SV=1	1	3	3	3	3	3	3	2	3	3	3	3	3	2	3	3	3	3	3	2	3	3	9.4	9.4	9.4	34.577	310	310	0.00082305	3.5831	By MS/MS	By MS/MS	By MS/MS	By MS/MS	By MS/MS	By MS/MS	9.4	9.4	9.4	6.5	9.4	9.4
O00499;Q9UBW5;P49418	O00499	8;1;1	8;1;1	8;1;1	Myc box-dependent-interacting protein 1	BIN1	sp|O00499|BIN1_HUMAN Myc box-dependent-interacting protein 1 OS=Homo sapiens OX=9606 GN=BIN1 PE=1 SV=1	3	8	8	8	5	6	7	8	5	7	5	6	7	8	5	7	5	6	7	8	5	7	17.2	17.2	17.2	64.699	593	593;565;695	0	50.065	By MS/MS	By MS/MS	By MS/MS	By MS/MS	By MS/MS	By MS/MS	8.8	12	15.5	17.2	13	15.9
O00501	O00501	1	1	1	Claudin-5	CLDN5	sp|O00501|CLD5_HUMAN Claudin-5 OS=Homo sapiens OX=9606 GN=CLDN5 PE=1 SV=1	1	1	1	1	0	1	1	1	1	1	0	1	1	1	1	1	0	1	1	1	1	1	7.3	7.3	7.3	23.147	218	218	0	6.985		By matching	By matching	By MS/MS	By MS/MS	By matching	0	7.3	7.3	7.3	7.3	7.3
O00505	O00505	4	4	2	Importin subunit alpha-4	KPNA3	sp|O00505|IMA4_HUMAN Importin subunit alpha-4 OS=Homo sapiens OX=9606 GN=KPNA3 PE=1 SV=2	1	4	4	2	2	3	3	3	4	2	2	3	3	3	4	2	1	2	2	1	2	1	9.4	9.4	5.2	57.81	521	521	0	4.8977	By MS/MS	By MS/MS	By MS/MS	By MS/MS	By MS/MS	By MS/MS	3.8	6.5	6.5	6.7	9.4	3.8
O00506	O00506	7	3	3	Serine/threonine-protein kinase 25	STK25	sp|O00506|STK25_HUMAN Serine/threonine-protein kinase 25 OS=Homo sapiens OX=9606 GN=STK25 PE=1 SV=1	1	7	3	3	6	7	7	7	7	7	2	3	3	3	3	3	2	3	3	3	3	3	17.1	6.6	6.6	48.111	426	426	0	5.1562	By MS/MS	By MS/MS	By MS/MS	By MS/MS	By MS/MS	By MS/MS	15.5	17.1	17.1	17.1	17.1	17.1
O00522	O00522	16	16	16	Krev interaction trapped protein 1	KRIT1	sp|O00522|KRIT1_HUMAN Krev interaction trapped protein 1 OS=Homo sapiens OX=9606 GN=KRIT1 PE=1 SV=2	1	16	16	16	15	15	15	15	15	15	15	15	15	15	15	15	15	15	15	15	15	15	26	26	26	84.347	736	736	0	135.57	By MS/MS	By MS/MS	By MS/MS	By MS/MS	By MS/MS	By MS/MS	26	26	24.6	24.7	26	24.7
O00526	O00526	7	7	7	Uroplakin-2	UPK2	sp|O00526|UPK2_HUMAN Uroplakin-2 OS=Homo sapiens OX=9606 GN=UPK2 PE=1 SV=2	1	7	7	7	6	7	7	7	7	7	6	7	7	7	7	7	6	7	7	7	7	7	42.4	42.4	42.4	19.438	184	184	0	50.242	By MS/MS	By MS/MS	By MS/MS	By MS/MS	By MS/MS	By MS/MS	35.9	42.4	42.4	42.4	42.4	42.4
O00534	O00534	13	13	13	von Willebrand factor A domain-containing protein 5A	VWA5A	sp|O00534|VMA5A_HUMAN von Willebrand factor A domain-containing protein 5A OS=Homo sapiens OX=9606 GN=VWA5A PE=1 SV=2	1	13	13	13	8	11	10	11	9	12	8	11	10	11	9	12	8	11	10	11	9	12	19.3	19.3	19.3	86.488	786	786	0	40.025	By MS/MS	By MS/MS	By MS/MS	By MS/MS	By MS/MS	By MS/MS	12.3	16.4	14.6	15.6	12.7	17.7
O00560	O00560	11	11	11	Syntenin-1	SDCBP	sp|O00560|SDCB1_HUMAN Syntenin-1 OS=Homo sapiens OX=9606 GN=SDCBP PE=1 SV=1	1	11	11	11	11	11	11	10	11	11	11	11	11	10	11	11	11	11	11	10	11	11	57.7	57.7	57.7	32.444	298	298	0	269.67	By MS/MS	By MS/MS	By MS/MS	By MS/MS	By MS/MS	By MS/MS	57.7	57.7	57.7	50.7	57.7	57.7
O00571;O15523;Q9NQI0	O00571;O15523	7;4;1	7;4;1	7;4;1	ATP-dependent RNA helicase DDX3X;ATP-dependent RNA helicase DDX3Y	DDX3X;DDX3Y	sp|O00571|DDX3X_HUMAN ATP-dependent RNA helicase DDX3X OS=Homo sapiens OX=9606 GN=DDX3X PE=1 SV=3;sp|O15523|DDX3Y_HUMAN ATP-dependent RNA helicase DDX3Y OS=Homo sapiens OX=9606 GN=DDX3Y PE=1 SV=2	3	7	7	7	7	5	6	5	4	5	7	5	6	5	4	5	7	5	6	5	4	5	9.7	9.7	9.7	73.243	662	662;660;724	0	9.2256	By MS/MS	By MS/MS	By MS/MS	By MS/MS	By MS/MS	By MS/MS	9.7	6.9	8.3	6.9	5.3	6.6
O00584	O00584	5	5	5	Ribonuclease T2	RNASET2	sp|O00584|RNT2_HUMAN Ribonuclease T2 OS=Homo sapiens OX=9606 GN=RNASET2 PE=1 SV=2	1	5	5	5	5	4	5	2	2	3	5	4	5	2	2	3	5	4	5	2	2	3	25	25	25	29.48	256	256	0	118.47	By MS/MS	By MS/MS	By MS/MS	By MS/MS	By MS/MS	By MS/MS	25	19.9	25	9.8	9.8	15.2
O00592	O00592	11	11	11	Podocalyxin	PODXL	sp|O00592|PODXL_HUMAN Podocalyxin OS=Homo sapiens OX=9606 GN=PODXL PE=1 SV=2	1	11	11	11	10	10	11	11	11	11	10	10	11	11	11	11	10	10	11	11	11	11	21	21	21	58.635	558	558	0	249.28	By MS/MS	By MS/MS	By MS/MS	By MS/MS	By MS/MS	By MS/MS	19.4	19.4	21	21	21	21
O00602;Q15485	O00602;Q15485	2;1	2;1	2;1	Ficolin-1;Ficolin-2	FCN1;FCN2	sp|O00602|FCN1_HUMAN Ficolin-1 OS=Homo sapiens OX=9606 GN=FCN1 PE=1 SV=2;sp|Q15485|FCN2_HUMAN Ficolin-2 OS=Homo sapiens OX=9606 GN=FCN2 PE=1 SV=2	2	2	2	2	2	1	1	0	1	0	2	1	1	0	1	0	2	1	1	0	1	0	4.9	4.9	4.9	35.078	326	326;313	0.0065562	1.5892	By matching	By MS/MS	By MS/MS		By MS/MS		4.9	2.8	2.8	0	2.1	0
O00625	O00625	2	2	2	Pirin	PIR	sp|O00625|PIR_HUMAN Pirin OS=Homo sapiens OX=9606 GN=PIR PE=1 SV=1	1	2	2	2	2	1	1	1	0	1	2	1	1	1	0	1	2	1	1	1	0	1	6.6	6.6	6.6	32.113	290	290	0.0011769	2.9265	By MS/MS	By MS/MS	By MS/MS	By MS/MS		By MS/MS	6.6	3.1	3.1	3.1	0	3.1
O00629	O00629	3	1	1	Importin subunit alpha-3	KPNA4	sp|O00629|IMA3_HUMAN Importin subunit alpha-3 OS=Homo sapiens OX=9606 GN=KPNA4 PE=1 SV=1	1	3	1	1	2	2	2	3	3	2	1	1	1	1	1	1	1	1	1	1	1	1	6.9	2.7	2.7	57.886	521	521	0.00043215	4.2232	By MS/MS	By MS/MS	By MS/MS	By MS/MS	By MS/MS	By matching	4	4	4	6.9	6.9	4
O00635	O00635	1	1	1	E3 ubiquitin-protein ligase TRIM38	TRIM38	sp|O00635|TRI38_HUMAN E3 ubiquitin-protein ligase TRIM38 OS=Homo sapiens OX=9606 GN=TRIM38 PE=1 SV=1	1	1	1	1	1	1	1	0	0	1	1	1	1	0	0	1	1	1	1	0	0	1	2.2	2.2	2.2	53.415	465	465	0.0052539	1.7586	By MS/MS	By MS/MS	By MS/MS			By MS/MS	2.2	2.2	2.2	0	0	2.2
O00743	O00743	1	1	1	Serine/threonine-protein phosphatase 6 catalytic subunit;Serine/threonine-protein phosphatase 6 catalytic subunit, N-terminally processed	PPP6C	sp|O00743|PPP6_HUMAN Serine/threonine-protein phosphatase 6 catalytic subunit OS=Homo sapiens OX=9606 GN=PPP6C PE=1 SV=1	1	1	1	1	1	0	1	0	1	1	1	0	1	0	1	1	1	0	1	0	1	1	3.9	3.9	3.9	35.144	305	305	0.00079872	3.1523	By matching		By MS/MS		By matching	By MS/MS	3.9	0	3.9	0	3.9	3.9
O00754	O00754	7	7	7	Lysosomal alpha-mannosidase;Lysosomal alpha-mannosidase A peptide;Lysosomal alpha-mannosidase B peptide;Lysosomal alpha-mannosidase C peptide;Lysosomal alpha-mannosidase D peptide;Lysosomal alpha-mannosidase E peptide	MAN2B1	sp|O00754|MA2B1_HUMAN Lysosomal alpha-mannosidase OS=Homo sapiens OX=9606 GN=MAN2B1 PE=1 SV=3	1	7	7	7	7	7	7	4	4	5	7	7	7	4	4	5	7	7	7	4	4	5	7.8	7.8	7.8	113.74	1011	1011	0	26.165	By MS/MS	By MS/MS	By MS/MS	By matching	By MS/MS	By matching	7.8	7.8	7.8	4.6	4.6	6.2
O00757	O00757	2	1	1	Fructose-1,6-bisphosphatase isozyme 2	FBP2	sp|O00757|F16P2_HUMAN Fructose-1,6-bisphosphatase isozyme 2 OS=Homo sapiens OX=9606 GN=FBP2 PE=1 SV=2	1	2	1	1	2	1	1	2	2	1	1	0	0	1	1	0	1	0	0	1	1	0	6.2	2.9	2.9	36.743	339	339	0	5.0126	By MS/MS	By matching	By matching	By MS/MS	By MS/MS	By matching	6.2	3.2	3.2	6.2	6.2	3.2
O00764	O00764	4	4	4	Pyridoxal kinase	PDXK	sp|O00764|PDXK_HUMAN Pyridoxal kinase OS=Homo sapiens OX=9606 GN=PDXK PE=1 SV=1	1	4	4	4	4	4	4	4	4	4	4	4	4	4	4	4	4	4	4	4	4	4	13.8	13.8	13.8	35.102	312	312	0	9.0169	By MS/MS	By MS/MS	By MS/MS	By MS/MS	By MS/MS	By MS/MS	13.8	13.8	13.8	13.8	13.8	13.8
O14493	O14493	1	1	1	Claudin-4	CLDN4	sp|O14493|CLD4_HUMAN Claudin-4 OS=Homo sapiens OX=9606 GN=CLDN4 PE=1 SV=1	1	1	1	1	1	1	1	1	1	1	1	1	1	1	1	1	1	1	1	1	1	1	5.3	5.3	5.3	22.077	209	209	0	8.0357	By MS/MS	By MS/MS	By MS/MS	By MS/MS	By MS/MS	By MS/MS	5.3	5.3	5.3	5.3	5.3	5.3
O14494	O14494	4	4	4	Lipid phosphate phosphohydrolase 1	PPAP2A	sp|O14494|PLPP1_HUMAN Phospholipid phosphatase 1 OS=Homo sapiens OX=9606 GN=PLPP1 PE=1 SV=1	1	4	4	4	2	4	3	3	3	2	2	4	3	3	3	2	2	4	3	3	3	2	17.3	17.3	17.3	32.156	284	284	0	42.745	By MS/MS	By MS/MS	By MS/MS	By MS/MS	By MS/MS	By MS/MS	12	17.3	16.9	12.3	12.3	8.8
O14498	O14498	4	4	4	Immunoglobulin superfamily containing leucine-rich repeat protein	ISLR	sp|O14498|ISLR_HUMAN Immunoglobulin superfamily containing leucine-rich repeat protein OS=Homo sapiens OX=9606 GN=ISLR PE=2 SV=1	1	4	4	4	4	4	3	4	3	3	4	4	3	4	3	3	4	4	3	4	3	3	14.7	14.7	14.7	45.997	428	428	0	27.398	By MS/MS	By MS/MS	By MS/MS	By MS/MS	By MS/MS	By MS/MS	14.7	14.7	12.1	14.7	12.1	12.1
O14520;A6NL99;A0A075B734	O14520;A6NL99	3;2;1	3;2;1	3;2;1	Aquaporin-7;Putative aquaporin-7-like protein 3	AQP7;AQP7P3	sp|O14520|AQP7_HUMAN Aquaporin-7 OS=Homo sapiens OX=9606 GN=AQP7 PE=1 SV=1;sp|A6NL99|AQP73_HUMAN Putative aquaporin-7-like protein 3 OS=Homo sapiens OX=9606 GN=AQP7P3 PE=5 SV=2	3	3	3	3	3	3	3	3	3	3	3	3	3	3	3	3	3	3	3	3	3	3	16.4	16.4	16.4	37.231	342	342;342;347	0	80.478	By MS/MS	By MS/MS	By MS/MS	By MS/MS	By MS/MS	By MS/MS	16.4	16.4	16.4	16.4	16.4	16.4
O14562	O14562	2	2	2	Ubiquitin domain-containing protein UBFD1	UBFD1	sp|O14562|UBFD1_HUMAN Ubiquitin domain-containing protein UBFD1 OS=Homo sapiens OX=9606 GN=UBFD1 PE=1 SV=2	1	2	2	2	2	2	2	2	2	2	2	2	2	2	2	2	2	2	2	2	2	2	9.4	9.4	9.4	33.382	309	309	0	9.2603	By MS/MS	By MS/MS	By MS/MS	By MS/MS	By MS/MS	By MS/MS	9.4	9.4	9.4	9.4	9.4	9.4
O14595	O14595	4	4	4	Carboxy-terminal domain RNA polymerase II polypeptide A small phosphatase 2	CTDSP2	sp|O14595|CTDS2_HUMAN Carboxy-terminal domain RNA polymerase II polypeptide A small phosphatase 2 OS=Homo sapiens OX=9606 GN=CTDSP2 PE=1 SV=2	1	4	4	4	3	3	3	3	3	4	3	3	3	3	3	4	3	3	3	3	3	4	15.9	15.9	15.9	30.664	271	271	0	7.2167	By MS/MS	By MS/MS	By MS/MS	By MS/MS	By MS/MS	By MS/MS	11.8	11.8	11.8	11.8	11.8	15.9
O14617	O14617	8	8	8	AP-3 complex subunit delta-1	AP3D1	sp|O14617|AP3D1_HUMAN AP-3 complex subunit delta-1 OS=Homo sapiens OX=9606 GN=AP3D1 PE=1 SV=1	1	8	8	8	7	6	7	1	3	4	7	6	7	1	3	4	7	6	7	1	3	4	8.4	8.4	8.4	130.16	1153	1153	0	9.903	By MS/MS	By MS/MS	By MS/MS	By matching	By matching	By MS/MS	7.4	6.4	7.7	1.6	2.7	3.8
O14618	O14618	4	4	4	Copper chaperone for superoxide dismutase	CCS	sp|O14618|CCS_HUMAN Copper chaperone for superoxide dismutase OS=Homo sapiens OX=9606 GN=CCS PE=1 SV=1	1	4	4	4	4	4	4	4	4	4	4	4	4	4	4	4	4	4	4	4	4	4	16.1	16.1	16.1	29.04	274	274	0	7.7873	By MS/MS	By MS/MS	By MS/MS	By MS/MS	By MS/MS	By MS/MS	16.1	16.1	16.1	16.1	16.1	16.1
O14638	O14638	18	18	18	Ectonucleotide pyrophosphatase/phosphodiesterase family member 3;Alkaline phosphodiesterase I;Nucleotide pyrophosphatase	ENPP3	sp|O14638|ENPP3_HUMAN Ectonucleotide pyrophosphatase/phosphodiesterase family member 3 OS=Homo sapiens OX=9606 GN=ENPP3 PE=1 SV=2	1	18	18	18	18	17	18	15	17	15	18	17	18	15	17	15	18	17	18	15	17	15	22.6	22.6	22.6	100.12	875	875	0	75.363	By MS/MS	By MS/MS	By MS/MS	By MS/MS	By MS/MS	By MS/MS	22.6	21.8	22.6	18.7	21.5	18.5
O14672	O14672	12	12	12	Disintegrin and metalloproteinase domain-containing protein 10	ADAM10	sp|O14672|ADA10_HUMAN Disintegrin and metalloproteinase domain-containing protein 10 OS=Homo sapiens OX=9606 GN=ADAM10 PE=1 SV=1	1	12	12	12	10	11	12	12	12	11	10	11	12	12	12	11	10	11	12	12	12	11	20.9	20.9	20.9	84.141	748	748	0	93.959	By MS/MS	By MS/MS	By MS/MS	By MS/MS	By MS/MS	By MS/MS	16.2	18.7	20.9	20.9	20.9	18.7
O14678	O14678	7	7	7	ATP-binding cassette sub-family D member 4	ABCD4	sp|O14678|ABCD4_HUMAN Lysosomal cobalamin transporter ABCD4 OS=Homo sapiens OX=9606 GN=ABCD4 PE=1 SV=1	1	7	7	7	6	5	6	4	4	6	6	5	6	4	4	6	6	5	6	4	4	6	11.6	11.6	11.6	68.597	606	606	0	30.51	By MS/MS	By MS/MS	By MS/MS	By MS/MS	By MS/MS	By MS/MS	9.9	9.9	9.9	8.4	8.4	11.6
O14713	O14713	6	6	6	Integrin beta-1-binding protein 1	ITGB1BP1	sp|O14713|ITBP1_HUMAN Integrin beta-1-binding protein 1 OS=Homo sapiens OX=9606 GN=ITGB1BP1 PE=1 SV=1	1	6	6	6	6	5	6	5	6	5	6	5	6	5	6	5	6	5	6	5	6	5	47.5	47.5	47.5	21.782	200	200	0	86.2	By MS/MS	By MS/MS	By MS/MS	By MS/MS	By MS/MS	By MS/MS	47.5	40	47.5	39.5	47.5	34
O14732	O14732	3	3	3	Inositol monophosphatase 2	IMPA2	sp|O14732|IMPA2_HUMAN Inositol monophosphatase 2 OS=Homo sapiens OX=9606 GN=IMPA2 PE=1 SV=1	1	3	3	3	1	2	2	1	3	2	1	2	2	1	3	2	1	2	2	1	3	2	10.8	10.8	10.8	31.321	288	288	0.00080613	3.3018	By matching	By MS/MS	By MS/MS	By MS/MS	By MS/MS	By MS/MS	4.2	7.3	7.3	4.2	10.8	7.6
O14737	O14737	5	5	5	Programmed cell death protein 5	PDCD5	sp|O14737|PDCD5_HUMAN Programmed cell death protein 5 OS=Homo sapiens OX=9606 GN=PDCD5 PE=1 SV=3	1	5	5	5	4	5	4	5	4	5	4	5	4	5	4	5	4	5	4	5	4	5	41.6	41.6	41.6	14.285	125	125	0	17.01	By MS/MS	By MS/MS	By MS/MS	By MS/MS	By MS/MS	By MS/MS	31.2	41.6	31.2	41.6	31.2	41.6
O14744	O14744	2	2	2	Protein arginine N-methyltransferase 5;Protein arginine N-methyltransferase 5, N-terminally processed	PRMT5	sp|O14744|ANM5_HUMAN Protein arginine N-methyltransferase 5 OS=Homo sapiens OX=9606 GN=PRMT5 PE=1 SV=4	1	2	2	2	1	1	0	1	1	2	1	1	0	1	1	2	1	1	0	1	1	2	3.3	3.3	3.3	72.683	637	637	0.0052356	1.7235	By MS/MS	By MS/MS		By MS/MS	By MS/MS	By MS/MS	1.7	1.7	0	1.7	1.7	3.3
O14745	O14745	22	22	22	Na(+)/H(+) exchange regulatory cofactor NHE-RF1	SLC9A3R1	sp|O14745|NHRF1_HUMAN Na(+)/H(+) exchange regulatory cofactor NHE-RF1 OS=Homo sapiens OX=9606 GN=NHERF1 PE=1 SV=4	1	22	22	22	21	21	22	19	20	22	21	21	22	19	20	22	21	21	22	19	20	22	64.8	64.8	64.8	38.868	358	358	0	288.44	By MS/MS	By MS/MS	By MS/MS	By MS/MS	By MS/MS	By MS/MS	64.8	64.8	64.8	57.5	57.5	64.8
O14772	O14772	2	2	2	Fucose-1-phosphate guanylyltransferase	FPGT	sp|O14772|FPGT_HUMAN Fucose-1-phosphate guanylyltransferase OS=Homo sapiens OX=9606 GN=FPGT PE=1 SV=3	1	2	2	2	0	1	2	0	0	1	0	1	2	0	0	1	0	1	2	0	0	1	4.9	4.9	4.9	68.009	607	607	0.0011507	2.6138		By MS/MS	By MS/MS			By MS/MS	0	3	4.9	0	0	2
O14773	O14773	4	4	4	Tripeptidyl-peptidase 1	TPP1	sp|O14773|TPP1_HUMAN Tripeptidyl-peptidase 1 OS=Homo sapiens OX=9606 GN=TPP1 PE=1 SV=2	1	4	4	4	4	4	4	3	4	3	4	4	4	3	4	3	4	4	4	3	4	3	6.7	6.7	6.7	61.247	563	563	0	14.056	By MS/MS	By MS/MS	By MS/MS	By MS/MS	By MS/MS	By MS/MS	6.7	6.7	6.7	5	6.7	5
O14777	O14777	2	2	2	Kinetochore protein NDC80 homolog	NDC80	sp|O14777|NDC80_HUMAN Kinetochore protein NDC80 homolog OS=Homo sapiens OX=9606 GN=NDC80 PE=1 SV=1	1	2	2	2	1	1	1	1	1	1	1	1	1	1	1	1	1	1	1	1	1	1	2.6	2.6	2.6	73.912	642	642	0.0025538	2.1027	By MS/MS	By MS/MS	By MS/MS	By MS/MS	By MS/MS	By MS/MS	1.2	1.2	1.2	1.4	1.2	1.2
O14786	O14786	1	1	1	Neuropilin-1	NRP1	sp|O14786|NRP1_HUMAN Neuropilin-1 OS=Homo sapiens OX=9606 GN=NRP1 PE=1 SV=3	1	1	1	1	1	1	1	0	0	0	1	1	1	0	0	0	1	1	1	0	0	0	1.8	1.8	1.8	103.13	923	923	0	8.5865	By MS/MS	By MS/MS	By MS/MS				1.8	1.8	1.8	0	0	0
O14787	O14787	3	1	1	Transportin-2	TNPO2	sp|O14787|TNPO2_HUMAN Transportin-2 OS=Homo sapiens OX=9606 GN=TNPO2 PE=1 SV=3	1	3	1	1	3	3	3	3	3	3	1	1	1	1	1	1	1	1	1	1	1	1	4.9	2.7	2.7	101.39	897	897	0	6.7383	By matching	By MS/MS	By matching	By matching	By MS/MS	By matching	4.9	4.9	4.9	4.9	4.9	4.9
O14795;Q9UPW8;Q8NB66	O14795	11;3;1	11;3;1	11;3;1	Protein unc-13 homolog B	UNC13B	sp|O14795|UN13B_HUMAN Protein unc-13 homolog B OS=Homo sapiens OX=9606 GN=UNC13B PE=1 SV=2	3	11	11	11	5	8	7	9	8	9	5	8	7	9	8	9	5	8	7	9	8	9	8.2	8.2	8.2	180.68	1591	1591;1703;2214	0	49.151	By MS/MS	By MS/MS	By MS/MS	By MS/MS	By MS/MS	By MS/MS	3.9	6	5.5	6.7	6.2	6.9
O14807	O14807	5	5	5	Ras-related protein M-Ras	MRAS	sp|O14807|RASM_HUMAN Ras-related protein M-Ras OS=Homo sapiens OX=9606 GN=MRAS PE=1 SV=2	1	5	5	5	5	5	5	4	5	5	5	5	5	4	5	5	5	5	5	4	5	5	29.8	29.8	29.8	23.846	208	208	0	19.284	By MS/MS	By MS/MS	By MS/MS	By MS/MS	By MS/MS	By MS/MS	29.8	29.8	29.8	24.5	29.8	29.8
O14818;Q8TAA3	O14818;Q8TAA3	5;3	5;3	5;3	Proteasome subunit alpha type-7;Proteasome subunit alpha type-7-like	PSMA7;PSMA8	sp|O14818|PSA7_HUMAN Proteasome subunit alpha type-7 OS=Homo sapiens OX=9606 GN=PSMA7 PE=1 SV=1;sp|Q8TAA3|PSMA8_HUMAN Proteasome subunit alpha-type 8 OS=Homo sapiens OX=9606 GN=PSMA8 PE=2 SV=3	2	5	5	5	5	5	5	5	5	5	5	5	5	5	5	5	5	5	5	5	5	5	23.8	23.8	23.8	27.887	248	248;256	0	10.823	By MS/MS	By MS/MS	By MS/MS	By MS/MS	By MS/MS	By MS/MS	23.8	23.8	23.8	23.8	23.8	23.8
O14828	O14828	4	4	4	Secretory carrier-associated membrane protein 3	SCAMP3	sp|O14828|SCAM3_HUMAN Secretory carrier-associated membrane protein 3 OS=Homo sapiens OX=9606 GN=SCAMP3 PE=1 SV=3	1	4	4	4	4	4	4	4	3	3	4	4	4	4	3	3	4	4	4	4	3	3	19.3	19.3	19.3	38.287	347	347	0	34.209	By MS/MS	By MS/MS	By MS/MS	By MS/MS	By MS/MS	By MS/MS	19.3	19.3	19.3	19.3	13.5	13.5
O14841	O14841	5	5	5	5-oxoprolinase	OPLAH	sp|O14841|OPLA_HUMAN 5-oxoprolinase OS=Homo sapiens OX=9606 GN=OPLAH PE=1 SV=3	1	5	5	5	3	4	5	5	3	3	3	4	5	5	3	3	3	4	5	5	3	3	7.1	7.1	7.1	137.46	1288	1288	0	14.656	By MS/MS	By MS/MS	By MS/MS	By MS/MS	By MS/MS	By MS/MS	4.5	6.1	7.1	7.1	4.4	4.4
O14896	O14896	1	1	1	Interferon regulatory factor 6	IRF6	sp|O14896|IRF6_HUMAN Interferon regulatory factor 6 OS=Homo sapiens OX=9606 GN=IRF6 PE=1 SV=1	1	1	1	1	1	0	0	1	0	1	1	0	0	1	0	1	1	0	0	1	0	1	6	6	6	53.129	467	467	0.0035791	1.9732	By matching			By matching		By MS/MS	6	0	0	6	0	6
O14907	O14907	1	1	1	Tax1-binding protein 3	TAX1BP3	sp|O14907|TX1B3_HUMAN Tax1-binding protein 3 OS=Homo sapiens OX=9606 GN=TAX1BP3 PE=1 SV=2	1	1	1	1	0	1	0	1	1	1	0	1	0	1	1	1	0	1	0	1	1	1	13.7	13.7	13.7	13.735	124	124	0	24.85		By matching		By MS/MS	By MS/MS	By matching	0	13.7	0	13.7	13.7	13.7
O14908;Q8TF64	O14908	6;1	6;1	6;1	PDZ domain-containing protein GIPC1	GIPC1	sp|O14908|GIPC1_HUMAN PDZ domain-containing protein GIPC1 OS=Homo sapiens OX=9606 GN=GIPC1 PE=1 SV=2	2	6	6	6	6	6	6	6	6	6	6	6	6	6	6	6	6	6	6	6	6	6	18.9	18.9	18.9	36.049	333	333;312	0	72.67	By MS/MS	By MS/MS	By MS/MS	By MS/MS	By MS/MS	By MS/MS	18.9	18.9	18.9	18.9	18.9	18.9
P19105;O14950;P24844	P19105;O14950;P24844	5;5;4	5;5;4	5;5;4	Myosin regulatory light chain 12A;Myosin regulatory light chain 12B;Myosin regulatory light polypeptide 9	MYL12A;MYL12B;MYL9	sp|P19105|ML12A_HUMAN Myosin regulatory light chain 12A OS=Homo sapiens OX=9606 GN=MYL12A PE=1 SV=2;sp|O14950|ML12B_HUMAN Myosin regulatory light chain 12B OS=Homo sapiens OX=9606 GN=MYL12B PE=1 SV=2;sp|P24844|MYL9_HUMAN Myosin regulatory light polypeptide	3	5	5	5	3	2	4	3	3	4	3	2	4	3	3	4	3	2	4	3	3	4	45	45	45	19.794	171	171;172;172	0	22.743	By MS/MS	By MS/MS	By MS/MS	By MS/MS	By MS/MS	By MS/MS	28.1	16.4	34.5	26.9	26.9	38.6
O14964	O14964	12	12	12	Hepatocyte growth factor-regulated tyrosine kinase substrate	HGS	sp|O14964|HGS_HUMAN Hepatocyte growth factor-regulated tyrosine kinase substrate OS=Homo sapiens OX=9606 GN=HGS PE=1 SV=1	1	12	12	12	11	10	11	10	10	10	11	10	11	10	10	10	11	10	11	10	10	10	20.8	20.8	20.8	86.191	777	777	0	87.107	By MS/MS	By MS/MS	By MS/MS	By MS/MS	By MS/MS	By MS/MS	20.8	16.1	16.1	16.1	16.1	16.1
O14966;P57729	O14966	11;1	11;1	10;0	Ras-related protein Rab-7L1	RAB29	sp|O14966|RAB7L_HUMAN Ras-related protein Rab-7L1 OS=Homo sapiens OX=9606 GN=RAB29 PE=1 SV=1	2	11	11	10	11	9	9	8	9	9	11	9	9	8	9	9	10	8	8	8	9	9	51.7	51.7	46.3	23.155	203	203;211	0	37.529	By MS/MS	By MS/MS	By MS/MS	By MS/MS	By MS/MS	By MS/MS	51.7	41.4	46.3	36.9	40.9	40.9
O14972	O14972	5	5	5	Down syndrome critical region protein 3	DSCR3	sp|O14972|VP26C_HUMAN Vacuolar protein sorting-associated protein 26C OS=Homo sapiens OX=9606 GN=VPS26C PE=1 SV=1	1	5	5	5	5	5	5	2	4	2	5	5	5	2	4	2	5	5	5	2	4	2	24.6	24.6	24.6	33.01	297	297	0	63.026	By MS/MS	By MS/MS	By MS/MS	By MS/MS	By MS/MS	By MS/MS	24.6	24.6	24.6	12.1	20.5	10.4
O14974	O14974	2	2	2	Protein phosphatase 1 regulatory subunit 12A	PPP1R12A	sp|O14974|MYPT1_HUMAN Protein phosphatase 1 regulatory subunit 12A OS=Homo sapiens OX=9606 GN=PPP1R12A PE=1 SV=1	1	2	2	2	1	0	1	1	2	2	1	0	1	1	2	2	1	0	1	1	2	2	2.5	2.5	2.5	115.28	1030	1030	0	5.0831	By MS/MS		By matching	By matching	By MS/MS	By MS/MS	1.2	0	1.4	1.2	2.5	2.5
O14975	O14975	4	4	4	Very long-chain acyl-CoA synthetase	SLC27A2	sp|O14975|S27A2_HUMAN Long-chain fatty acid transport protein 2 OS=Homo sapiens OX=9606 GN=SLC27A2 PE=1 SV=2	1	4	4	4	3	3	3	2	2	3	3	3	3	2	2	3	3	3	3	2	2	3	8.1	8.1	8.1	70.311	620	620	0	6.3283	By MS/MS	By MS/MS	By MS/MS	By MS/MS	By MS/MS	By MS/MS	5.8	5.8	5.8	4	3.9	6.1
O14976	O14976	4	4	4	Cyclin-G-associated kinase	GAK	sp|O14976|GAK_HUMAN Cyclin-G-associated kinase OS=Homo sapiens OX=9606 GN=GAK PE=1 SV=2	1	4	4	4	4	3	4	3	3	3	4	3	4	3	3	3	4	3	4	3	3	3	3.4	3.4	3.4	143.19	1311	1311	0	6.5846	By MS/MS	By MS/MS	By MS/MS	By MS/MS	By MS/MS	By MS/MS	3.4	2.5	3.4	2.5	2.6	2.5
O14980	O14980	3	3	3	Exportin-1	XPO1	sp|O14980|XPO1_HUMAN Exportin-1 OS=Homo sapiens OX=9606 GN=XPO1 PE=1 SV=1	1	3	3	3	2	2	3	3	3	2	2	2	3	3	3	2	2	2	3	3	3	2	3.9	3.9	3.9	123.38	1071	1071	0	6.9965	By MS/MS	By MS/MS	By MS/MS	By MS/MS	By MS/MS	By MS/MS	2.2	2.6	3.9	3.9	3.9	2.6
O14981	O14981	1	1	1	TATA-binding protein-associated factor 172	BTAF1	sp|O14981|BTAF1_HUMAN TATA-binding protein-associated factor 172 OS=Homo sapiens OX=9606 GN=BTAF1 PE=1 SV=2	1	1	1	1	1	1	1	1	1	1	1	1	1	1	1	1	1	1	1	1	1	1	0.6	0.6	0.6	206.89	1849	1849	0.0062783	1.7082	By MS/MS	By MS/MS	By MS/MS	By MS/MS	By MS/MS	By MS/MS	0.6	0.6	0.6	0.6	0.6	0.6
O15020;P11277	O15020	4;1	3;0	3;0	Spectrin beta chain, non-erythrocytic 2	SPTBN2	sp|O15020|SPTN2_HUMAN Spectrin beta chain, non-erythrocytic 2 OS=Homo sapiens OX=9606 GN=SPTBN2 PE=1 SV=3	2	4	3	3	4	3	3	3	3	4	3	2	3	2	2	3	3	2	3	2	2	3	2.1	1.7	1.7	271.32	2390	2390;2137	0	8.3598	By MS/MS	By MS/MS	By MS/MS	By MS/MS	By MS/MS	By MS/MS	2.1	1.5	1.7	1.5	1.5	2.1
O15021	O15021	2	1	1	Microtubule-associated serine/threonine-protein kinase 4	MAST4	sp|O15021|MAST4_HUMAN Microtubule-associated serine/threonine-protein kinase 4 OS=Homo sapiens OX=9606 GN=MAST4 PE=1 SV=4	1	2	1	1	2	1	2	2	2	1	1	0	1	1	1	0	1	0	1	1	1	0	0.8	0.5	0.5	284.09	2623	2623	1	-2	By MS/MS	By matching	By MS/MS	By MS/MS	By matching	By matching	0.8	0.3	0.8	0.8	0.8	0.3
O15031	O15031	24	24	24	Plexin-B2	PLXNB2	sp|O15031|PLXB2_HUMAN Plexin-B2 OS=Homo sapiens OX=9606 GN=PLXNB2 PE=1 SV=3	1	24	24	24	20	19	23	22	23	22	20	19	23	22	23	22	20	19	23	22	23	22	17.7	17.7	17.7	205.12	1838	1838	0	142.26	By MS/MS	By MS/MS	By MS/MS	By MS/MS	By MS/MS	By MS/MS	13.8	13.3	16.9	16.4	17	16.2
O15037	O15037	2	2	2	Protein KHNYN	KHNYN	sp|O15037|KHNYN_HUMAN Protein KHNYN OS=Homo sapiens OX=9606 GN=KHNYN PE=1 SV=3	1	2	2	2	1	1	2	0	0	0	1	1	2	0	0	0	1	1	2	0	0	0	4	4	4	74.533	678	678	0.0011442	2.562	By matching	By matching	By MS/MS				1.6	1.6	4	0	0	0
O15066;O14782;Q9BVG8;Q9P2E2	O15066	13;2;1;1	12;2;1;1	12;2;1;1	Kinesin-like protein KIF3B;Kinesin-like protein KIF3B, N-terminally processed	KIF3B	sp|O15066|KIF3B_HUMAN Kinesin-like protein KIF3B OS=Homo sapiens OX=9606 GN=KIF3B PE=1 SV=1	4	13	12	12	9	11	11	11	9	8	8	10	10	10	8	7	8	10	10	10	8	7	23.6	21.8	21.8	85.124	747	747;793;833;1029	0	59.527	By MS/MS	By MS/MS	By MS/MS	By MS/MS	By MS/MS	By MS/MS	15.7	18.5	18.5	20.2	14.6	13.4
O15067	O15067	5	5	5	Phosphoribosylformylglycinamidine synthase	PFAS	sp|O15067|PUR4_HUMAN Phosphoribosylformylglycinamidine synthase OS=Homo sapiens OX=9606 GN=PFAS PE=1 SV=4	1	5	5	5	3	4	4	3	5	4	3	4	4	3	5	4	3	4	4	3	5	4	4.7	4.7	4.7	144.73	1338	1338	0	11.234	By MS/MS	By MS/MS	By MS/MS	By MS/MS	By MS/MS	By MS/MS	3.3	4	4	3.2	4.7	3.3
O15068	O15068	2	2	2	Guanine nucleotide exchange factor DBS	MCF2L	sp|O15068|MCF2L_HUMAN Guanine nucleotide exchange factor DBS OS=Homo sapiens OX=9606 GN=MCF2L PE=1 SV=2	1	2	2	2	1	1	2	1	2	1	1	1	2	1	2	1	1	1	2	1	2	1	2.7	2.7	2.7	128.11	1137	1137	0.00080096	3.1854	By MS/MS	By matching	By matching	By matching	By MS/MS	By matching	1.1	1.1	2.7	1.1	2.7	1.6
O15116	O15116	1	1	1	U6 snRNA-associated Sm-like protein LSm1	LSM1	sp|O15116|LSM1_HUMAN U6 snRNA-associated Sm-like protein LSm1 OS=Homo sapiens OX=9606 GN=LSM1 PE=1 SV=1	1	1	1	1	0	0	0	1	0	1	0	0	0	1	0	1	0	0	0	1	0	1	18.8	18.8	18.8	15.179	133	133	0.001153	2.6315				By MS/MS		By MS/MS	0	0	0	18.8	0	18.8
O15118	O15118	5	5	5	Niemann-Pick C1 protein	NPC1	sp|O15118|NPC1_HUMAN NPC intracellular cholesterol transporter 1 OS=Homo sapiens OX=9606 GN=NPC1 PE=1 SV=2	1	5	5	5	5	5	5	4	2	2	5	5	5	4	2	2	5	5	5	4	2	2	3.8	3.8	3.8	142.17	1278	1278	0	8.9508	By MS/MS	By MS/MS	By MS/MS	By MS/MS	By MS/MS	By MS/MS	3.8	3.8	3.8	2.9	1.5	1.2
O15126	O15126	3	3	3	Secretory carrier-associated membrane protein 1	SCAMP1	sp|O15126|SCAM1_HUMAN Secretory carrier-associated membrane protein 1 OS=Homo sapiens OX=9606 GN=SCAMP1 PE=1 SV=2	1	3	3	3	3	3	3	3	2	2	3	3	3	3	2	2	3	3	3	3	2	2	10.9	10.9	10.9	37.92	338	338	0	10.062	By MS/MS	By MS/MS	By MS/MS	By MS/MS	By MS/MS	By MS/MS	10.9	10.9	10.9	10.9	7.1	7.1
O15127	O15127	2	2	2	Secretory carrier-associated membrane protein 2	SCAMP2	sp|O15127|SCAM2_HUMAN Secretory carrier-associated membrane protein 2 OS=Homo sapiens OX=9606 GN=SCAMP2 PE=1 SV=2	1	2	2	2	2	2	2	1	1	1	2	2	2	1	1	1	2	2	2	1	1	1	9.7	9.7	9.7	36.648	329	329	0	4.6042	By MS/MS	By MS/MS	By MS/MS	By MS/MS	By MS/MS	By MS/MS	9.7	9.7	9.7	6.1	6.1	6.1
O15143	O15143	10	10	10	Actin-related protein 2/3 complex subunit 1B	ARPC1B	sp|O15143|ARC1B_HUMAN Actin-related protein 2/3 complex subunit 1B OS=Homo sapiens OX=9606 GN=ARPC1B PE=1 SV=3	1	10	10	10	10	9	9	10	8	9	10	9	9	10	8	9	10	9	9	10	8	9	29.8	29.8	29.8	40.949	372	372	0	86.996	By MS/MS	By MS/MS	By MS/MS	By MS/MS	By MS/MS	By MS/MS	29.8	29.8	29.8	29.8	24.7	29.8
O15144	O15144	9	9	9	Actin-related protein 2/3 complex subunit 2	ARPC2	sp|O15144|ARPC2_HUMAN Actin-related protein 2/3 complex subunit 2 OS=Homo sapiens OX=9606 GN=ARPC2 PE=1 SV=1	1	9	9	9	9	7	6	7	7	6	9	7	6	7	7	6	9	7	6	7	7	6	29.3	29.3	29.3	34.333	300	300	0	25.75	By MS/MS	By MS/MS	By MS/MS	By MS/MS	By MS/MS	By MS/MS	29.3	21	21	24	23.3	21.3
O15145	O15145	5	5	5	Actin-related protein 2/3 complex subunit 3	ARPC3	sp|O15145|ARPC3_HUMAN Actin-related protein 2/3 complex subunit 3 OS=Homo sapiens OX=9606 GN=ARPC3 PE=1 SV=3	1	5	5	5	5	5	5	5	5	5	5	5	5	5	5	5	5	5	5	5	5	5	25.8	25.8	25.8	20.546	178	178	0	22.707	By MS/MS	By MS/MS	By MS/MS	By MS/MS	By MS/MS	By MS/MS	25.8	25.8	25.8	25.8	25.8	25.8
O15162	O15162	3	3	3	Phospholipid scramblase 1	PLSCR1	sp|O15162|PLS1_HUMAN Phospholipid scramblase 1 OS=Homo sapiens OX=9606 GN=PLSCR1 PE=1 SV=1	1	3	3	3	2	2	2	2	2	3	2	2	2	2	2	3	2	2	2	2	2	3	9.4	9.4	9.4	35.049	318	318	0	8.6726	By MS/MS	By MS/MS	By MS/MS	By MS/MS	By MS/MS	By MS/MS	7.2	7.2	7.2	7.2	7.2	9.4
O15194	O15194	7	7	6	CTD small phosphatase-like protein	CTDSPL	sp|O15194|CTDSL_HUMAN CTD small phosphatase-like protein OS=Homo sapiens OX=9606 GN=CTDSPL PE=1 SV=2	1	7	7	6	6	6	5	5	5	7	6	6	5	5	5	7	6	5	5	4	4	6	24.3	24.3	21.7	31.128	276	276	0	13.585	By MS/MS	By MS/MS	By MS/MS	By MS/MS	By MS/MS	By MS/MS	21.7	21	18.5	18.8	20.7	24.3
O15195	O15195	6	6	6	Villin-like protein	VILL	sp|O15195|VILL_HUMAN Villin-like protein OS=Homo sapiens OX=9606 GN=VILL PE=1 SV=3	1	6	6	6	3	4	4	5	5	5	3	4	4	5	5	5	3	4	4	5	5	5	8.4	8.4	8.4	95.906	856	856	0	10.351	By MS/MS	By MS/MS	By MS/MS	By MS/MS	By MS/MS	By MS/MS	4	5.1	6	7.2	7.1	7.2
O15212	O15212	3	3	3	Prefoldin subunit 6	PFDN6	sp|O15212|PFD6_HUMAN Prefoldin subunit 6 OS=Homo sapiens OX=9606 GN=PFDN6 PE=1 SV=1	1	3	3	3	3	2	3	3	2	2	3	2	3	3	2	2	3	2	3	3	2	2	27.9	27.9	27.9	14.582	129	129	0.00081202	3.3943	By MS/MS	By MS/MS	By MS/MS	By MS/MS	By MS/MS	By MS/MS	27.9	18.6	27.9	27.9	17.1	17.1
O15229	O15229	4	4	4	Kynurenine 3-monooxygenase	KMO	sp|O15229|KMO_HUMAN Kynurenine 3-monooxygenase OS=Homo sapiens OX=9606 GN=KMO PE=1 SV=2	1	4	4	4	4	2	3	2	2	2	4	2	3	2	2	2	4	2	3	2	2	2	12.3	12.3	12.3	55.809	486	486	0	15.318	By MS/MS	By MS/MS	By MS/MS	By MS/MS	By MS/MS	By matching	12.3	6	9.7	6	6	6
O15231	O15231	4	4	4	Zinc finger protein 185	ZNF185	sp|O15231|ZN185_HUMAN Zinc finger protein 185 OS=Homo sapiens OX=9606 GN=ZNF185 PE=1 SV=3	1	4	4	4	3	3	2	3	2	2	3	3	2	3	2	2	3	3	2	3	2	2	7.5	7.5	7.5	73.525	689	689	0.00043384	4.2947	By MS/MS	By MS/MS	By MS/MS	By MS/MS	By MS/MS	By MS/MS	6.5	6.5	4.1	5.1	4.1	4.1
O15244	O15244	6	6	6	Solute carrier family 22 member 2	SLC22A2	sp|O15244|S22A2_HUMAN Solute carrier family 22 member 2 OS=Homo sapiens OX=9606 GN=SLC22A2 PE=1 SV=2	1	6	6	6	6	6	6	6	6	6	6	6	6	6	6	6	6	6	6	6	6	6	10.5	10.5	10.5	62.58	555	555	0	10.931	By MS/MS	By MS/MS	By MS/MS	By MS/MS	By MS/MS	By MS/MS	10.5	10.5	10.5	10.5	10.5	10.5
O15247	O15247	2	2	2	Chloride intracellular channel protein 2	CLIC2	sp|O15247|CLIC2_HUMAN Chloride intracellular channel protein 2 OS=Homo sapiens OX=9606 GN=CLIC2 PE=1 SV=3	1	2	2	2	0	1	1	1	0	2	0	1	1	1	0	2	0	1	1	1	0	2	10.5	10.5	10.5	28.356	247	247	0.00085616	4.1099		By matching	By MS/MS	By matching		By MS/MS	0	4.5	4.5	4.5	0	10.5
O15294	O15294	1	1	1	UDP-N-acetylglucosamine--peptide N-acetylglucosaminyltransferase 110 kDa subunit	OGT	sp|O15294|OGT1_HUMAN UDP-N-acetylglucosamine--peptide N-acetylglucosaminyltransferase 110 kDa subunit OS=Homo sapiens OX=9606 GN=OGT PE=1 SV=3	1	1	1	1	1	1	1	1	1	1	1	1	1	1	1	1	1	1	1	1	1	1	1.1	1.1	1.1	116.92	1046	1046	0.0011485	2.6005	By MS/MS	By MS/MS	By MS/MS	By MS/MS	By matching	By MS/MS	1.1	1.1	1.1	1.1	1.1	1.1
O15296	O15296	3	3	3	Arachidonate 15-lipoxygenase B	ALOX15B	sp|O15296|LX15B_HUMAN Polyunsaturated fatty acid lipoxygenase ALOX15B OS=Homo sapiens OX=9606 GN=ALOX15B PE=1 SV=3	1	3	3	3	3	3	3	3	3	3	3	3	3	3	3	3	3	3	3	3	3	3	6.1	6.1	6.1	75.856	676	676	0	8.0149	By MS/MS	By MS/MS	By MS/MS	By MS/MS	By MS/MS	By MS/MS	6.1	6.1	6.1	6.1	6.1	6.1
O15305	O15305	5	5	5	Phosphomannomutase 2	PMM2	sp|O15305|PMM2_HUMAN Phosphomannomutase 2 OS=Homo sapiens OX=9606 GN=PMM2 PE=1 SV=1	1	5	5	5	4	5	4	3	3	2	4	5	4	3	3	2	4	5	4	3	3	2	21.1	21.1	21.1	28.082	246	246	0	22.258	By MS/MS	By MS/MS	By MS/MS	By MS/MS	By MS/MS	By MS/MS	17.9	21.1	17.9	12.6	12.6	9.3
O15327	O15327	4	4	4	Type II inositol 3,4-bisphosphate 4-phosphatase	INPP4B	sp|O15327|INP4B_HUMAN Inositol polyphosphate 4-phosphatase type II OS=Homo sapiens OX=9606 GN=INPP4B PE=1 SV=4	1	4	4	4	4	3	2	4	3	3	4	3	2	4	3	3	4	3	2	4	3	3	6	6	6	104.74	924	924	0	10.291	By MS/MS	By MS/MS	By MS/MS	By MS/MS	By MS/MS	By MS/MS	6	4.4	2.4	6	4.4	4.8
O15344	O15344	1	1	1	E3 ubiquitin-protein ligase Midline-1	MID1	sp|O15344|TRI18_HUMAN E3 ubiquitin-protein ligase Midline-1 OS=Homo sapiens OX=9606 GN=MID1 PE=1 SV=1	1	1	1	1	1	1	1	1	0	1	1	1	1	1	0	1	1	1	1	1	0	1	1.9	1.9	1.9	75.25	667	667	0.0097808	1.4243	By matching	By MS/MS	By matching	By matching		By matching	1.9	1.9	1.9	1.9	0	1.9
O15357	O15357	2	2	2	Phosphatidylinositol 3,4,5-trisphosphate 5-phosphatase 2	INPPL1	sp|O15357|SHIP2_HUMAN Phosphatidylinositol 3,4,5-trisphosphate 5-phosphatase 2 OS=Homo sapiens OX=9606 GN=INPPL1 PE=1 SV=2	1	2	2	2	2	2	1	1	1	1	2	2	1	1	1	1	2	2	1	1	1	1	1.7	1.7	1.7	138.6	1258	1258	0.0011334	2.4555	By MS/MS	By MS/MS	By MS/MS	By MS/MS	By matching	By matching	1.7	1.7	0.8	1	1	1
O15374	O15374	3	3	3	Monocarboxylate transporter 5	SLC16A4	sp|O15374|MOT5_HUMAN Monocarboxylate transporter 5 OS=Homo sapiens OX=9606 GN=SLC16A4 PE=1 SV=1	1	3	3	3	2	2	1	1	1	2	2	2	1	1	1	2	2	2	1	1	1	2	10.9	10.9	10.9	54.021	487	487	0	41.474	By MS/MS	By MS/MS	By MS/MS	By matching	By MS/MS	By MS/MS	9.2	7.2	5.5	5.5	5.5	9.2
O15393	O15393	12	12	12	Transmembrane protease serine 2;Transmembrane protease serine 2 non-catalytic chain;Transmembrane protease serine 2 catalytic chain	TMPRSS2	sp|O15393|TMPS2_HUMAN Transmembrane protease serine 2 OS=Homo sapiens OX=9606 GN=TMPRSS2 PE=1 SV=3	1	12	12	12	11	12	11	11	11	11	11	12	11	11	11	11	11	12	11	11	11	11	30.9	30.9	30.9	53.859	492	492	0	319.08	By MS/MS	By MS/MS	By MS/MS	By MS/MS	By MS/MS	By MS/MS	30.5	30.9	30.5	30.5	30.5	30.5
O15400	O15400	9	9	9	Syntaxin-7	STX7	sp|O15400|STX7_HUMAN Syntaxin-7 OS=Homo sapiens OX=9606 GN=STX7 PE=1 SV=4	1	9	9	9	9	8	9	7	5	6	9	8	9	7	5	6	9	8	9	7	5	6	44.4	44.4	44.4	29.815	261	261	0	102.55	By MS/MS	By MS/MS	By MS/MS	By MS/MS	By MS/MS	By MS/MS	44.4	44.4	44.4	38.3	29.5	33.3
O15431	O15431	2	2	2	High affinity copper uptake protein 1	SLC31A1	sp|O15431|COPT1_HUMAN High affinity copper uptake protein 1 OS=Homo sapiens OX=9606 GN=SLC31A1 PE=1 SV=1	1	2	2	2	2	2	2	2	2	2	2	2	2	2	2	2	2	2	2	2	2	2	15.8	15.8	15.8	21.09	190	190	0	15.657	By MS/MS	By MS/MS	By MS/MS	By MS/MS	By MS/MS	By MS/MS	15.8	15.8	15.8	15.8	15.8	15.8
O15439	O15439	7	7	7	Multidrug resistance-associated protein 4	ABCC4	sp|O15439|MRP4_HUMAN ATP-binding cassette sub-family C member 4 OS=Homo sapiens OX=9606 GN=ABCC4 PE=1 SV=3	1	7	7	7	6	6	6	4	5	4	6	6	6	4	5	4	6	6	6	4	5	4	6.5	6.5	6.5	149.52	1325	1325	0	33.129	By MS/MS	By MS/MS	By MS/MS	By MS/MS	By MS/MS	By MS/MS	5.6	5.8	5.8	4.1	4.9	4.5
O15455	O15455	8	8	8	Toll-like receptor 3	TLR3	sp|O15455|TLR3_HUMAN Toll-like receptor 3 OS=Homo sapiens OX=9606 GN=TLR3 PE=1 SV=1	1	8	8	8	7	8	7	4	4	6	7	8	7	4	4	6	7	8	7	4	4	6	11	11	11	103.83	904	904	0	25.355	By MS/MS	By MS/MS	By MS/MS	By MS/MS	By MS/MS	By MS/MS	9.8	11	10.1	5.8	6.4	8.6
O15484	O15484	21	21	21	Calpain-5	CAPN5	sp|O15484|CAN5_HUMAN Calpain-5 OS=Homo sapiens OX=9606 GN=CAPN5 PE=1 SV=2	1	21	21	21	18	19	18	20	17	20	18	19	18	20	17	20	18	19	18	20	17	20	26.7	26.7	26.7	73.168	640	640	0	71.169	By MS/MS	By MS/MS	By MS/MS	By MS/MS	By MS/MS	By MS/MS	23.3	25.5	25	25.5	22.8	25.6
O15498	O15498	7	7	7	Synaptobrevin homolog YKT6	YKT6	sp|O15498|YKT6_HUMAN Synaptobrevin homolog YKT6 OS=Homo sapiens OX=9606 GN=YKT6 PE=1 SV=1	1	7	7	7	7	7	7	7	7	7	7	7	7	7	7	7	7	7	7	7	7	7	30.3	30.3	30.3	22.417	198	198	0	9.8775	By MS/MS	By MS/MS	By MS/MS	By MS/MS	By MS/MS	By MS/MS	30.3	30.3	30.3	30.3	30.3	30.3
O15511	O15511	6	6	6	Actin-related protein 2/3 complex subunit 5	ARPC5	sp|O15511|ARPC5_HUMAN Actin-related protein 2/3 complex subunit 5 OS=Homo sapiens OX=9606 GN=ARPC5 PE=1 SV=3	1	6	6	6	6	6	6	6	6	5	6	6	6	6	6	5	6	6	6	6	6	5	52.3	52.3	52.3	16.32	151	151	0	97.95	By MS/MS	By MS/MS	By MS/MS	By MS/MS	By MS/MS	By MS/MS	52.3	52.3	52.3	52.3	52.3	43.7
O43150;Q9ULH1	O43150	8;2	8;2	8;2	Arf-GAP with SH3 domain, ANK repeat and PH domain-containing protein 2	ASAP2	sp|O43150|ASAP2_HUMAN Arf-GAP with SH3 domain, ANK repeat and PH domain-containing protein 2 OS=Homo sapiens OX=9606 GN=ASAP2 PE=1 SV=3	2	8	8	8	5	6	5	6	7	7	5	6	5	6	7	7	5	6	5	6	7	7	10.9	10.9	10.9	111.65	1006	1006;1129	0	18.255	By MS/MS	By MS/MS	By MS/MS	By MS/MS	By MS/MS	By MS/MS	6.6	6.7	7.6	8.3	8.4	8.4
O43157	O43157	2	2	2	Plexin-B1	PLXNB1	sp|O43157|PLXB1_HUMAN Plexin-B1 OS=Homo sapiens OX=9606 GN=PLXNB1 PE=1 SV=3	1	2	2	2	1	1	1	1	1	1	1	1	1	1	1	1	1	1	1	1	1	1	1.3	1.3	1.3	232.3	2135	2135	0	5.4717	By matching	By matching	By MS/MS	By MS/MS	By MS/MS	By MS/MS	0.9	0.9	0.3	0.9	0.9	0.9
O43175	O43175	14	14	14	D-3-phosphoglycerate dehydrogenase	PHGDH	sp|O43175|SERA_HUMAN D-3-phosphoglycerate dehydrogenase OS=Homo sapiens OX=9606 GN=PHGDH PE=1 SV=4	1	14	14	14	13	13	12	12	12	12	13	13	12	12	12	12	13	13	12	12	12	12	31.5	31.5	31.5	56.65	533	533	0	171.54	By MS/MS	By MS/MS	By MS/MS	By MS/MS	By MS/MS	By MS/MS	28.9	31.5	27.2	28.9	28.9	28.9
O43182	O43182	5	5	5	Rho GTPase-activating protein 6	ARHGAP6	sp|O43182|RHG06_HUMAN Rho GTPase-activating protein 6 OS=Homo sapiens OX=9606 GN=ARHGAP6 PE=1 SV=3	1	5	5	5	4	4	3	4	3	4	4	4	3	4	3	4	4	4	3	4	3	4	8.3	8.3	8.3	105.95	974	974	0	32.279	By MS/MS	By MS/MS	By MS/MS	By MS/MS	By MS/MS	By MS/MS	6.7	6.7	5.4	6.7	4	5.6
O43242	O43242	4	4	4	26S proteasome non-ATPase regulatory subunit 3	PSMD3	sp|O43242|PSMD3_HUMAN 26S proteasome non-ATPase regulatory subunit 3 OS=Homo sapiens OX=9606 GN=PSMD3 PE=1 SV=2	1	4	4	4	4	4	4	3	3	4	4	4	4	3	3	4	4	4	4	3	3	4	9	9	9	60.977	534	534	0	62.265	By MS/MS	By MS/MS	By MS/MS	By MS/MS	By MS/MS	By MS/MS	9	9	9	6.9	9	9
O43278	O43278	7	7	7	Kunitz-type protease inhibitor 1	SPINT1	sp|O43278|SPIT1_HUMAN Kunitz-type protease inhibitor 1 OS=Homo sapiens OX=9606 GN=SPINT1 PE=1 SV=2	1	7	7	7	5	6	6	6	5	5	5	6	6	6	5	5	5	6	6	6	5	5	12.3	12.3	12.3	58.397	529	529	0	18.474	By MS/MS	By MS/MS	By MS/MS	By MS/MS	By MS/MS	By MS/MS	10.2	10.4	10.4	10.4	10	10.4
O43280	O43280	8	8	8	Trehalase	TREH	sp|O43280|TREA_HUMAN Trehalase OS=Homo sapiens OX=9606 GN=TREH PE=1 SV=2	1	8	8	8	7	7	7	7	7	8	7	7	7	7	7	8	7	7	7	7	7	8	16.6	16.6	16.6	66.567	583	583	0	54.625	By MS/MS	By MS/MS	By MS/MS	By MS/MS	By MS/MS	By MS/MS	14.6	14.6	14.6	14.6	14.6	16.6
O43291	O43291	5	5	5	Kunitz-type protease inhibitor 2	SPINT2	sp|O43291|SPIT2_HUMAN Kunitz-type protease inhibitor 2 OS=Homo sapiens OX=9606 GN=SPINT2 PE=1 SV=2	1	5	5	5	4	4	5	5	4	5	4	4	5	5	4	5	4	4	5	5	4	5	28.2	28.2	28.2	28.228	252	252	0	47.829	By MS/MS	By MS/MS	By MS/MS	By MS/MS	By MS/MS	By MS/MS	21.8	17.1	28.2	28.2	17.1	28.2
O43295	O43295	8	8	8	SLIT-ROBO Rho GTPase-activating protein 3	SRGAP3	sp|O43295|SRGP3_HUMAN SLIT-ROBO Rho GTPase-activating protein 3 OS=Homo sapiens OX=9606 GN=SRGAP3 PE=1 SV=3	1	8	8	8	4	6	4	7	6	5	4	6	4	7	6	5	4	6	4	7	6	5	8.6	8.6	8.6	124.5	1099	1099	0	13.122	By MS/MS	By MS/MS	By MS/MS	By MS/MS	By MS/MS	By MS/MS	4.4	6.5	3.9	7.3	6.1	5.3
O43299	O43299	3	3	3	AP-5 complex subunit zeta-1	AP5Z1	sp|O43299|AP5Z1_HUMAN AP-5 complex subunit zeta-1 OS=Homo sapiens OX=9606 GN=AP5Z1 PE=1 SV=2	1	3	3	3	3	3	3	1	0	0	3	3	3	1	0	0	3	3	3	1	0	0	6.1	6.1	6.1	88.604	807	807	0	14.184	By MS/MS	By MS/MS	By MS/MS	By matching			6.1	6.1	6.1	1.1	0	0
O43301;Q96MM6	O43301	14;2	14;2	14;2	Heat shock 70 kDa protein 12A	HSPA12A	sp|O43301|HS12A_HUMAN Heat shock 70 kDa protein 12A OS=Homo sapiens OX=9606 GN=HSPA12A PE=1 SV=2	2	14	14	14	12	11	12	14	13	14	12	11	12	14	13	14	12	11	12	14	13	14	26.2	26.2	26.2	74.977	675	675;686	0	94.082	By MS/MS	By MS/MS	By MS/MS	By MS/MS	By MS/MS	By MS/MS	21.6	20.4	21.6	26.2	23.4	26.2
O43306	O43306	1	1	1	Adenylate cyclase type 6	ADCY6	sp|O43306|ADCY6_HUMAN Adenylate cyclase type 6 OS=Homo sapiens OX=9606 GN=ADCY6 PE=1 SV=2	1	1	1	1	1	0	0	0	1	1	1	0	0	0	1	1	1	0	0	0	1	1	1.8	1.8	1.8	130.61	1168	1168	0.0081633	1.4808	By matching				By MS/MS	By MS/MS	1.8	0	0	0	1.8	1.8
O43324	O43324	1	1	1	Eukaryotic translation elongation factor 1 epsilon-1	EEF1E1	sp|O43324|MCA3_HUMAN Eukaryotic translation elongation factor 1 epsilon-1 OS=Homo sapiens OX=9606 GN=EEF1E1 PE=1 SV=1	1	1	1	1	1	1	1	1	1	1	1	1	1	1	1	1	1	1	1	1	1	1	6.3	6.3	6.3	19.81	174	174	0.0011601	2.7175	By MS/MS	By MS/MS	By MS/MS	By MS/MS	By MS/MS	By MS/MS	6.3	6.3	6.3	6.3	6.3	6.3
O43396	O43396	6	6	6	Thioredoxin-like protein 1	TXNL1	sp|O43396|TXNL1_HUMAN Thioredoxin-like protein 1 OS=Homo sapiens OX=9606 GN=TXNL1 PE=1 SV=3	1	6	6	6	5	4	6	5	4	4	5	4	6	5	4	4	5	4	6	5	4	4	30.1	30.1	30.1	32.251	289	289	0	83.037	By MS/MS	By MS/MS	By MS/MS	By MS/MS	By MS/MS	By MS/MS	26.3	26.3	30.1	26.3	26.3	26.3
O43399	O43399	3	3	3	Tumor protein D54	TPD52L2	sp|O43399|TPD54_HUMAN Tumor protein D54 OS=Homo sapiens OX=9606 GN=TPD52L2 PE=1 SV=2	1	3	3	3	3	2	3	3	3	3	3	2	3	3	3	3	3	2	3	3	3	3	24.8	24.8	24.8	22.237	206	206	0	87.535	By MS/MS	By MS/MS	By MS/MS	By MS/MS	By MS/MS	By MS/MS	24.8	19.4	24.8	24.8	24.8	24.8
O43447	O43447	1	1	1	Peptidyl-prolyl cis-trans isomerase H	PPIH	sp|O43447|PPIH_HUMAN Peptidyl-prolyl cis-trans isomerase H OS=Homo sapiens OX=9606 GN=PPIH PE=1 SV=1	1	1	1	1	1	1	1	1	1	1	1	1	1	1	1	1	1	1	1	1	1	1	5.6	5.6	5.6	19.208	177	177	0.0065427	1.5711	By MS/MS	By matching	By MS/MS	By MS/MS	By MS/MS	By MS/MS	5.6	5.6	5.6	5.6	5.6	5.6
O43451;Q2M2H8	O43451	36;2	36;2	36;2	Maltase-glucoamylase, intestinal;Maltase;Glucoamylase	MGAM	sp|O43451|MGA_HUMAN Maltase-glucoamylase OS=Homo sapiens OX=9606 GN=MGAM PE=1 SV=6	2	36	36	36	31	33	31	32	30	30	31	33	31	32	30	30	31	33	31	32	30	30	20.7	20.7	20.7	312.02	2753	2753;2515	0	259.66	By MS/MS	By MS/MS	By MS/MS	By MS/MS	By MS/MS	By MS/MS	16.9	18.9	18.2	18.6	18.2	17.3
O43488	O43488	7	7	4	Aflatoxin B1 aldehyde reductase member 2	AKR7A2	sp|O43488|ARK72_HUMAN Aflatoxin B1 aldehyde reductase member 2 OS=Homo sapiens OX=9606 GN=AKR7A2 PE=1 SV=3	1	7	7	4	6	6	5	4	6	6	6	6	5	4	6	6	3	3	2	1	3	3	21.2	21.2	11.7	39.589	359	359	0	14.829	By MS/MS	By MS/MS	By MS/MS	By MS/MS	By MS/MS	By MS/MS	17.8	17.8	14.8	12.8	17.8	18.1
O43490	O43490	25	25	25	Prominin-1	PROM1	sp|O43490|PROM1_HUMAN Prominin-1 OS=Homo sapiens OX=9606 GN=PROM1 PE=1 SV=1	1	25	25	25	25	25	24	24	24	24	25	25	24	24	24	24	25	25	24	24	24	24	30.5	30.5	30.5	97.201	865	865	0	323.31	By MS/MS	By MS/MS	By MS/MS	By MS/MS	By MS/MS	By MS/MS	30.5	30.5	30.4	30.4	30.4	30.4
O43504	O43504	5	5	5	Ragulator complex protein LAMTOR5	LAMTOR5	sp|O43504|LTOR5_HUMAN Ragulator complex protein LAMTOR5 OS=Homo sapiens OX=9606 GN=LAMTOR5 PE=1 SV=1	1	5	5	5	5	5	5	4	4	4	5	5	5	4	4	4	5	5	5	4	4	4	96.7	96.7	96.7	9.6138	91	91	0	189.61	By MS/MS	By MS/MS	By MS/MS	By MS/MS	By MS/MS	By MS/MS	96.7	96.7	96.7	70.3	70.3	70.3
O43505	O43505	2	2	2	Beta-1,4-glucuronyltransferase 1	B4GAT1	sp|O43505|B4GA1_HUMAN Beta-1,4-glucuronyltransferase 1 OS=Homo sapiens OX=9606 GN=B4GAT1 PE=1 SV=1	1	2	2	2	2	2	1	2	2	2	2	2	1	2	2	2	2	2	1	2	2	2	5.8	5.8	5.8	47.119	415	415	0	6.5867	By MS/MS	By MS/MS	By MS/MS	By MS/MS	By MS/MS	By MS/MS	5.8	5.8	3.9	5.8	5.8	5.8
O43511	O43511	10	10	10	Pendrin	SLC26A4	sp|O43511|S26A4_HUMAN Pendrin OS=Homo sapiens OX=9606 GN=SLC26A4 PE=1 SV=1	1	10	10	10	9	9	9	9	10	8	9	9	9	9	10	8	9	9	9	9	10	8	11.5	11.5	11.5	85.722	780	780	0	55.652	By MS/MS	By MS/MS	By MS/MS	By MS/MS	By MS/MS	By MS/MS	10.3	10.3	10.3	10.4	11.5	9.2
O43520;Q8TF62;O60312	O43520	19;1;1	19;1;1	19;1;1	Phospholipid-transporting ATPase IC	ATP8B1	sp|O43520|AT8B1_HUMAN Phospholipid-transporting ATPase IC OS=Homo sapiens OX=9606 GN=ATP8B1 PE=1 SV=3	3	19	19	19	15	16	17	14	16	16	15	16	17	14	16	16	15	16	17	14	16	16	19.8	19.8	19.8	143.69	1251	1251;1192;1499	0	134.84	By MS/MS	By MS/MS	By MS/MS	By MS/MS	By MS/MS	By MS/MS	15.4	15.8	17.3	14.1	17.2	17.2
O43567	O43567	9	9	9	E3 ubiquitin-protein ligase RNF13	RNF13	sp|O43567|RNF13_HUMAN E3 ubiquitin-protein ligase RNF13 OS=Homo sapiens OX=9606 GN=RNF13 PE=1 SV=1	1	9	9	9	9	8	7	6	6	6	9	8	7	6	6	6	9	8	7	6	6	6	23.6	23.6	23.6	42.813	381	381	0	180.97	By MS/MS	By MS/MS	By MS/MS	By MS/MS	By MS/MS	By MS/MS	23.6	21.5	21.5	21.3	21.5	21.5
O43570	O43570	2	2	2	Carbonic anhydrase 12	CA12	sp|O43570|CAH12_HUMAN Carbonic anhydrase 12 OS=Homo sapiens OX=9606 GN=CA12 PE=1 SV=1	1	2	2	2	2	2	2	2	2	2	2	2	2	2	2	2	2	2	2	2	2	2	6.2	6.2	6.2	39.45	354	354	0	5.3858	By MS/MS	By MS/MS	By MS/MS	By MS/MS	By MS/MS	By MS/MS	6.2	6.2	6.2	6.2	6.2	6.2
O43581	O43581	8	8	8	Synaptotagmin-7	SYT7	sp|O43581|SYT7_HUMAN Synaptotagmin-7 OS=Homo sapiens OX=9606 GN=SYT7 PE=1 SV=3	1	8	8	8	8	6	8	8	8	8	8	6	8	8	8	8	8	6	8	8	8	8	18.1	18.1	18.1	45.501	403	403	0	22.275	By MS/MS	By MS/MS	By MS/MS	By MS/MS	By MS/MS	By MS/MS	18.1	16.1	18.1	18.1	18.1	18.1
O43583	O43583	4	4	4	Density-regulated protein	DENR	sp|O43583|DENR_HUMAN Density-regulated protein OS=Homo sapiens OX=9606 GN=DENR PE=1 SV=2	1	4	4	4	3	4	2	3	3	3	3	4	2	3	3	3	3	4	2	3	3	3	32.3	32.3	32.3	22.092	198	198	0	73.236	By MS/MS	By MS/MS	By MS/MS	By MS/MS	By MS/MS	By MS/MS	28.3	32.3	20.2	28.3	28.3	28.3
O43617	O43617	3	3	3	Trafficking protein particle complex subunit 3	TRAPPC3	sp|O43617|TPPC3_HUMAN Trafficking protein particle complex subunit 3 OS=Homo sapiens OX=9606 GN=TRAPPC3 PE=1 SV=1	1	3	3	3	1	2	3	1	3	2	1	2	3	1	3	2	1	2	3	1	3	2	16.1	16.1	16.1	20.274	180	180	0.00084531	3.8904	By MS/MS	By MS/MS	By MS/MS	By MS/MS	By MS/MS	By MS/MS	5.6	10	16.1	5.6	16.1	11.7
O43633	O43633	15	15	15	Charged multivesicular body protein 2a	CHMP2A	sp|O43633|CHM2A_HUMAN Charged multivesicular body protein 2a OS=Homo sapiens OX=9606 GN=CHMP2A PE=1 SV=1	1	15	15	15	13	14	14	13	15	15	13	14	14	13	15	15	13	14	14	13	15	15	41.9	41.9	41.9	25.104	222	222	0	188.76	By MS/MS	By MS/MS	By MS/MS	By MS/MS	By MS/MS	By MS/MS	36.9	38.7	38.7	38.3	41.9	41.9
O43639	O43639	7	7	6	Cytoplasmic protein NCK2	NCK2	sp|O43639|NCK2_HUMAN Cytoplasmic protein NCK2 OS=Homo sapiens OX=9606 GN=NCK2 PE=1 SV=2	1	7	7	6	7	7	7	7	6	6	7	7	7	7	6	6	6	6	6	6	5	5	18.4	18.4	16.3	42.915	380	380	0	25.526	By MS/MS	By MS/MS	By MS/MS	By MS/MS	By MS/MS	By MS/MS	18.4	18.4	18.4	18.4	18.4	15.5
O43653	O43653	4	4	4	Prostate stem cell antigen	PSCA	sp|O43653|PSCA_HUMAN Prostate stem cell antigen OS=Homo sapiens OX=9606 GN=PSCA PE=1 SV=2	1	4	4	4	4	4	4	4	3	4	4	4	4	4	3	4	4	4	4	4	3	4	46.5	46.5	46.5	11.959	114	114	0	106.51	By MS/MS	By MS/MS	By MS/MS	By MS/MS	By MS/MS	By MS/MS	46.5	46.5	46.5	46.5	24.6	46.5
O43657	O43657	6	6	6	Tetraspanin-6	TSPAN6	sp|O43657|TSN6_HUMAN Tetraspanin-6 OS=Homo sapiens OX=9606 GN=TSPAN6 PE=1 SV=1	1	6	6	6	6	6	6	6	6	6	6	6	6	6	6	6	6	6	6	6	6	6	21.6	21.6	21.6	27.563	245	245	0	107.6	By MS/MS	By MS/MS	By MS/MS	By MS/MS	By MS/MS	By MS/MS	21.6	21.6	21.6	21.6	21.6	21.6
O43681	O43681	5	5	5	ATPase ASNA1	ASNA1	sp|O43681|GET3_HUMAN ATPase GET3 OS=Homo sapiens OX=9606 GN=GET3 PE=1 SV=2	1	5	5	5	5	3	5	5	4	3	5	3	5	5	4	3	5	3	5	5	4	3	13.8	13.8	13.8	38.792	348	348	0	8.1621	By MS/MS	By MS/MS	By MS/MS	By MS/MS	By MS/MS	By MS/MS	13.8	7.5	13.8	13.8	11.2	7.5
O43687;Q9P0M2	O43687;Q9P0M2	2;1	2;1	2;1	A-kinase anchor protein 7 isoforms alpha and beta;A-kinase anchor protein 7 isoform gamma	AKAP7	sp|O43687|AKA7A_HUMAN A-kinase anchor protein 7 isoforms alpha and beta OS=Homo sapiens OX=9606 GN=AKAP7 PE=1 SV=4;sp|Q9P0M2|AKA7G_HUMAN A-kinase anchor protein 7 isoform gamma OS=Homo sapiens OX=9606 GN=AKAP7 PE=1 SV=2	2	2	2	2	2	2	2	2	2	2	2	2	2	2	2	2	2	2	2	2	2	2	25	25	25	11.464	104	104;348	0	22.138	By MS/MS	By MS/MS	By MS/MS	By MS/MS	By MS/MS	By MS/MS	25	25	25	25	25	25
O43707;Q08043;Q9H254	O43707	41;3;1	41;3;1	32;0;1	Alpha-actinin-4	ACTN4	sp|O43707|ACTN4_HUMAN Alpha-actinin-4 OS=Homo sapiens OX=9606 GN=ACTN4 PE=1 SV=2	3	41	41	32	37	36	36	34	38	39	37	36	36	34	38	39	30	27	30	28	30	30	51.9	51.9	42.2	104.85	911	911;901;2564	0	323.31	By MS/MS	By MS/MS	By MS/MS	By MS/MS	By MS/MS	By MS/MS	48.2	45.4	46.3	44.5	49.3	50.7
O43708	O43708	1	1	1	Maleylacetoacetate isomerase	GSTZ1	sp|O43708|MAAI_HUMAN Maleylacetoacetate isomerase OS=Homo sapiens OX=9606 GN=GSTZ1 PE=1 SV=3	1	1	1	1	1	1	0	1	1	1	1	1	0	1	1	1	1	1	0	1	1	1	6.5	6.5	6.5	24.212	216	216	0.002201	2.1444	By MS/MS	By MS/MS		By MS/MS	By MS/MS	By MS/MS	6.5	6.5	0	6.5	6.5	6.5
O43747	O43747	5	5	5	AP-1 complex subunit gamma-1	AP1G1	sp|O43747|AP1G1_HUMAN AP-1 complex subunit gamma-1 OS=Homo sapiens OX=9606 GN=AP1G1 PE=1 SV=5	1	5	5	5	5	5	5	5	4	5	5	5	5	5	4	5	5	5	5	5	4	5	5.8	5.8	5.8	91.35	822	822	0	8.8411	By MS/MS	By MS/MS	By MS/MS	By MS/MS	By MS/MS	By MS/MS	5.8	5.8	5.8	5.8	4.5	5.8
O43765	O43765	2	2	2	Small glutamine-rich tetratricopeptide repeat-containing protein alpha	SGTA	sp|O43765|SGTA_HUMAN Small glutamine-rich tetratricopeptide repeat-containing protein alpha OS=Homo sapiens OX=9606 GN=SGTA PE=1 SV=1	1	2	2	2	1	1	2	1	1	1	1	1	2	1	1	1	1	1	2	1	1	1	8	8	8	34.063	313	313	0	4.634	By MS/MS	By MS/MS	By MS/MS	By MS/MS	By MS/MS	By MS/MS	4.2	4.2	8	4.2	4.2	4.2
O43768;P56211	O43768	3;1	3;1	3;1	Alpha-endosulfine	ENSA	sp|O43768|ENSA_HUMAN Alpha-endosulfine OS=Homo sapiens OX=9606 GN=ENSA PE=1 SV=1	2	3	3	3	3	2	2	3	3	2	3	2	2	3	3	2	3	2	2	3	3	2	26.4	26.4	26.4	13.389	121	121;112	0	9.4238	By MS/MS	By MS/MS	By MS/MS	By MS/MS	By MS/MS	By MS/MS	26.4	16.5	16.5	26.4	26.4	16.5
O43776	O43776	6	6	6	Asparagine--tRNA ligase, cytoplasmic	NARS	sp|O43776|SYNC_HUMAN Asparagine--tRNA ligase, cytoplasmic OS=Homo sapiens OX=9606 GN=NARS1 PE=1 SV=1	1	6	6	6	5	6	6	5	6	6	5	6	6	5	6	6	5	6	6	5	6	6	16.1	16.1	16.1	62.942	548	548	0	39.447	By MS/MS	By MS/MS	By MS/MS	By MS/MS	By MS/MS	By MS/MS	14.1	16.1	16.1	13.9	16.1	16.1
O43795	O43795	34	34	32	Unconventional myosin-Ib	MYO1B	sp|O43795|MYO1B_HUMAN Unconventional myosin-Ib OS=Homo sapiens OX=9606 GN=MYO1B PE=1 SV=3	1	34	34	32	29	31	30	28	32	31	29	31	30	28	32	31	27	29	28	26	30	29	32.4	32.4	29.8	131.98	1136	1136	0	191.41	By MS/MS	By MS/MS	By MS/MS	By MS/MS	By MS/MS	By MS/MS	28.6	29.1	28.7	25.6	30.4	29.1
O43813	O43813	6	6	6	LanC-like protein 1	LANCL1	sp|O43813|LANC1_HUMAN Glutathione S-transferase LANCL1 OS=Homo sapiens OX=9606 GN=LANCL1 PE=1 SV=1	1	6	6	6	6	5	6	5	6	6	6	5	6	5	6	6	6	5	6	5	6	6	17.8	17.8	17.8	45.283	399	399	0	24.095	By MS/MS	By MS/MS	By MS/MS	By MS/MS	By MS/MS	By MS/MS	17.8	14.8	17.8	14.8	17.8	17.8
O43854	O43854	4	4	4	EGF-like repeat and discoidin I-like domain-containing protein 3	EDIL3	sp|O43854|EDIL3_HUMAN EGF-like repeat and discoidin I-like domain-containing protein 3 OS=Homo sapiens OX=9606 GN=EDIL3 PE=1 SV=1	1	4	4	4	3	2	3	4	3	3	3	2	3	4	3	3	3	2	3	4	3	3	9.6	9.6	9.6	53.764	480	480	0	6.5157	By MS/MS	By MS/MS	By MS/MS	By MS/MS	By MS/MS	By MS/MS	7.1	3.5	7.1	9.6	7.1	7.1
O43865;Q96HN2	O43865;Q96HN2	13;7	13;7	13;7	Putative adenosylhomocysteinase 2;Putative adenosylhomocysteinase 3	AHCYL1;AHCYL2	sp|O43865|SAHH2_HUMAN S-adenosylhomocysteine hydrolase-like protein 1 OS=Homo sapiens OX=9606 GN=AHCYL1 PE=1 SV=2;sp|Q96HN2|SAHH3_HUMAN Adenosylhomocysteinase 3 OS=Homo sapiens OX=9606 GN=AHCYL2 PE=1 SV=1	2	13	13	13	11	12	11	11	11	12	11	12	11	11	11	12	11	12	11	11	11	12	26.6	26.6	26.6	58.951	530	530;611	0	45.07	By MS/MS	By MS/MS	By MS/MS	By MS/MS	By MS/MS	By MS/MS	20.2	22.6	23	20.2	20.2	24.2
O43866	O43866	1	1	1	CD5 antigen-like	CD5L	sp|O43866|CD5L_HUMAN CD5 antigen-like OS=Homo sapiens OX=9606 GN=CD5L PE=1 SV=1	1	1	1	1	1	1	1	1	0	1	1	1	1	1	0	1	1	1	1	1	0	1	4	4	4	38.087	347	347	0	5.2888	By matching	By matching	By matching	By matching		By MS/MS	4	4	4	4	0	4
O43895	O43895	19	19	19	Xaa-Pro aminopeptidase 2	XPNPEP2	sp|O43895|XPP2_HUMAN Xaa-Pro aminopeptidase 2 OS=Homo sapiens OX=9606 GN=XPNPEP2 PE=1 SV=3	1	19	19	19	19	19	17	19	17	18	19	19	17	19	17	18	19	19	17	19	17	18	30.6	30.6	30.6	75.624	674	674	0	113.38	By MS/MS	By MS/MS	By MS/MS	By MS/MS	By MS/MS	By MS/MS	30.6	30.6	27.6	30.6	25.5	29.1
O60229	O60229	9	9	9	Kalirin	KALRN	sp|O60229|KALRN_HUMAN Kalirin OS=Homo sapiens OX=9606 GN=KALRN PE=1 SV=3	1	9	9	9	8	9	7	9	9	8	8	9	7	9	9	8	8	9	7	9	9	8	4.2	4.2	4.2	340.26	2986	2986	0	34.946	By MS/MS	By MS/MS	By MS/MS	By MS/MS	By MS/MS	By MS/MS	3.7	4.2	3.2	4.2	4.2	3.7
O60235	O60235	1	1	1	Transmembrane protease serine 11D;Transmembrane protease serine 11D non-catalytic chain;Transmembrane protease serine 11D catalytic chain	TMPRSS11D	sp|O60235|TM11D_HUMAN Transmembrane protease serine 11D OS=Homo sapiens OX=9606 GN=TMPRSS11D PE=1 SV=1	1	1	1	1	1	1	1	0	0	0	1	1	1	0	0	0	1	1	1	0	0	0	3.3	3.3	3.3	46.263	418	418	0.0011472	2.5929	By MS/MS	By MS/MS	By MS/MS				3.3	3.3	3.3	0	0	0
O60256	O60256	1	1	1	Phosphoribosyl pyrophosphate synthase-associated protein 2	PRPSAP2	sp|O60256|KPRB_HUMAN Phosphoribosyl pyrophosphate synthase-associated protein 2 OS=Homo sapiens OX=9606 GN=PRPSAP2 PE=1 SV=1	1	1	1	1	1	1	1	1	1	1	1	1	1	1	1	1	1	1	1	1	1	1	2.7	2.7	2.7	40.925	369	369	0.0052798	1.7978	By MS/MS	By MS/MS	By MS/MS	By MS/MS	By MS/MS	By MS/MS	2.7	2.7	2.7	2.7	2.7	2.7
O60259	O60259	1	1	1	Kallikrein-8	KLK8	sp|O60259|KLK8_HUMAN Kallikrein-8 OS=Homo sapiens OX=9606 GN=KLK8 PE=1 SV=1	1	1	1	1	1	1	1	0	0	1	1	1	1	0	0	1	1	1	1	0	0	1	3.5	3.5	3.5	28.048	260	260	0.0062565	1.6673	By MS/MS	By MS/MS	By MS/MS			By MS/MS	3.5	3.5	3.5	0	0	3.5
O60262	O60262	4	4	4	Guanine nucleotide-binding protein G(I)/G(S)/G(O) subunit gamma-7	GNG7	sp|O60262|GBG7_HUMAN Guanine nucleotide-binding protein G(I)/G(S)/G(O) subunit gamma-7 OS=Homo sapiens OX=9606 GN=GNG7 PE=1 SV=1	1	4	4	4	4	4	4	4	4	4	4	4	4	4	4	4	4	4	4	4	4	4	63.2	63.2	63.2	7.5217	68	68	0	39.339	By MS/MS	By MS/MS	By MS/MS	By MS/MS	By MS/MS	By MS/MS	63.2	63.2	63.2	63.2	63.2	63.2
O60266	O60266	4	4	4	Adenylate cyclase type 3	ADCY3	sp|O60266|ADCY3_HUMAN Adenylate cyclase type 3 OS=Homo sapiens OX=9606 GN=ADCY3 PE=1 SV=3	1	4	4	4	3	3	4	3	2	2	3	3	4	3	2	2	3	3	4	3	2	2	4.1	4.1	4.1	128.96	1144	1144	0.00085288	4.0404	By MS/MS	By MS/MS	By MS/MS	By MS/MS	By matching	By matching	3.5	3.5	4.1	3.5	2.4	2.4
O60268	O60268	5	5	5	Uncharacterized protein KIAA0513	KIAA0513	sp|O60268|K0513_HUMAN Uncharacterized protein KIAA0513 OS=Homo sapiens OX=9606 GN=KIAA0513 PE=1 SV=1	1	5	5	5	5	5	4	4	4	4	5	5	4	4	4	4	5	5	4	4	4	4	14.4	14.4	14.4	46.638	411	411	0	17.286	By MS/MS	By MS/MS	By MS/MS	By MS/MS	By MS/MS	By MS/MS	14.4	14.4	11.9	11.9	11.4	11.9
O60271;Q9UPT6	O60271	37;5	37;5	37;5	C-Jun-amino-terminal kinase-interacting protein 4	SPAG9	sp|O60271|JIP4_HUMAN C-Jun-amino-terminal kinase-interacting protein 4 OS=Homo sapiens OX=9606 GN=SPAG9 PE=1 SV=4	2	37	37	37	36	32	36	16	20	14	36	32	36	16	20	14	36	32	36	16	20	14	34.8	34.8	34.8	146.2	1321	1321;1336	0	301.45	By MS/MS	By MS/MS	By MS/MS	By MS/MS	By MS/MS	By MS/MS	34.8	31.2	33.2	17.2	20.4	14.5
O60282;Q969V6	O60282	21;1	14;1	13;1	Kinesin heavy chain isoform 5C	KIF5C	sp|O60282|KIF5C_HUMAN Kinesin heavy chain isoform 5C OS=Homo sapiens OX=9606 GN=KIF5C PE=1 SV=1	2	21	14	13	14	18	20	18	18	20	8	11	14	11	11	13	7	11	13	11	10	12	28	18.7	17.5	109.49	957	957;931	0	65.568	By MS/MS	By MS/MS	By MS/MS	By MS/MS	By MS/MS	By MS/MS	18	24.1	25.9	23.9	23.8	26.6
O60291;Q96PX1	O60291	9;1	9;1	9;1	E3 ubiquitin-protein ligase MGRN1	MGRN1	sp|O60291|MGRN1_HUMAN E3 ubiquitin-protein ligase MGRN1 OS=Homo sapiens OX=9606 GN=MGRN1 PE=1 SV=2	2	9	9	9	7	8	8	9	6	7	7	8	8	9	6	7	7	8	8	9	6	7	22.1	22.1	22.1	60.752	552	552;679	0	23.39	By MS/MS	By MS/MS	By MS/MS	By MS/MS	By MS/MS	By MS/MS	17.2	20.5	20.5	22.1	14.9	16.1
O60308	O60308	8	8	8	Centrosomal protein of 104 kDa	CEP104	sp|O60308|CE104_HUMAN Centrosomal protein of 104 kDa OS=Homo sapiens OX=9606 GN=CEP104 PE=1 SV=1	1	8	8	8	6	7	5	7	7	6	6	7	5	7	7	6	6	7	5	7	7	6	10.6	10.6	10.6	104.45	925	925	0	40.361	By MS/MS	By MS/MS	By MS/MS	By MS/MS	By MS/MS	By MS/MS	8.6	10.5	6.9	10.5	8.9	8.6
O60331	O60331	4	4	3	Phosphatidylinositol 4-phosphate 5-kinase type-1 gamma	PIP5K1C	sp|O60331|PI51C_HUMAN Phosphatidylinositol 4-phosphate 5-kinase type-1 gamma OS=Homo sapiens OX=9606 GN=PIP5K1C PE=1 SV=2	1	4	4	3	2	3	2	2	2	3	2	3	2	2	2	3	1	2	1	2	2	3	8.1	8.1	7	73.259	668	668	0	27.642	By matching	By MS/MS	By MS/MS	By MS/MS	By MS/MS	By MS/MS	3.9	6.3	3.4	5.2	5.2	7
O60343	O60343	6	6	6	TBC1 domain family member 4	TBC1D4	sp|O60343|TBCD4_HUMAN TBC1 domain family member 4 OS=Homo sapiens OX=9606 GN=TBC1D4 PE=1 SV=2	1	6	6	6	3	1	3	4	2	2	3	1	3	4	2	2	3	1	3	4	2	2	5.3	5.3	5.3	146.56	1298	1298	0	7.3584	By matching	By MS/MS	By MS/MS	By MS/MS	By matching	By MS/MS	3.1	1.1	2.6	3.8	2.1	2.1
O60437;REV__Q9ULW3;REV__Q8NDI1	O60437	82;1;1	82;1;1	82;1;1	Periplakin	PPL	sp|O60437|PEPL_HUMAN Periplakin OS=Homo sapiens OX=9606 GN=PPL PE=1 SV=4	3	82	82	82	72	72	72	77	74	74	72	72	72	77	74	74	72	72	72	77	74	74	45.4	45.4	45.4	204.74	1756	1756;272;1231	0	323.31	By MS/MS	By MS/MS	By MS/MS	By MS/MS	By MS/MS	By MS/MS	41.3	41.9	43.1	42.5	43.1	43.5
O60478	O60478	2	2	2	Integral membrane protein GPR137B	GPR137B	sp|O60478|G137B_HUMAN Integral membrane protein GPR137B OS=Homo sapiens OX=9606 GN=GPR137B PE=1 SV=1	1	2	2	2	2	2	2	2	1	1	2	2	2	2	1	1	2	2	2	2	1	1	6.8	6.8	6.8	45.599	399	399	0	8.9376	By MS/MS	By MS/MS	By MS/MS	By MS/MS	By MS/MS	By MS/MS	6.8	6.8	6.8	6.8	4	4
O60488;O95573	O60488	20;2	20;2	20;2	Long-chain-fatty-acid--CoA ligase 4	ACSL4	sp|O60488|ACSL4_HUMAN Long-chain-fatty-acid--CoA ligase 4 OS=Homo sapiens OX=9606 GN=ACSL4 PE=1 SV=2	2	20	20	20	18	18	20	18	18	17	18	18	20	18	18	17	18	18	20	18	18	17	34.7	34.7	34.7	79.187	711	711;720	0	122.44	By MS/MS	By MS/MS	By MS/MS	By MS/MS	By MS/MS	By MS/MS	31.1	31.1	34.7	29.3	31.1	29.7
O60493	O60493	7	7	5	Sorting nexin-3	SNX3	sp|O60493|SNX3_HUMAN Sorting nexin-3 OS=Homo sapiens OX=9606 GN=SNX3 PE=1 SV=3	1	7	7	5	7	7	6	6	6	6	7	7	6	6	6	6	5	5	4	4	4	4	37	37	27.2	18.762	162	162	0	13.14	By MS/MS	By MS/MS	By MS/MS	By MS/MS	By MS/MS	By MS/MS	37	37	32.7	32.1	32.1	32.1
O60494	O60494	41	41	41	Cubilin	CUBN	sp|O60494|CUBN_HUMAN Cubilin OS=Homo sapiens OX=9606 GN=CUBN PE=1 SV=5	1	41	41	41	38	36	37	33	33	32	38	36	37	33	33	32	38	36	37	33	33	32	13.5	13.5	13.5	398.73	3623	3623	0	210.21	By MS/MS	By MS/MS	By MS/MS	By MS/MS	By MS/MS	By MS/MS	12.5	12.2	12.3	10.7	10.9	10.8
O60500	O60500	16	16	16	Nephrin	NPHS1	sp|O60500|NPHN_HUMAN Nephrin OS=Homo sapiens OX=9606 GN=NPHS1 PE=1 SV=1	1	16	16	16	13	13	13	16	16	16	13	13	13	16	16	16	13	13	13	16	16	16	15.9	15.9	15.9	134.74	1241	1241	0	162.24	By MS/MS	By MS/MS	By MS/MS	By MS/MS	By MS/MS	By MS/MS	13.5	13.1	13.1	15.9	15.9	15.9
O60547	O60547	5	5	5	GDP-mannose 4,6 dehydratase	GMDS	sp|O60547|GMDS_HUMAN GDP-mannose 4,6 dehydratase OS=Homo sapiens OX=9606 GN=GMDS PE=1 SV=1	1	5	5	5	5	4	4	3	3	4	5	4	4	3	3	4	5	4	4	3	3	4	16.7	16.7	16.7	41.949	372	372	0	13.211	By MS/MS	By MS/MS	By MS/MS	By MS/MS	By MS/MS	By MS/MS	16.7	13.7	14.2	8.9	7.5	11.3
O60602	O60602	1	1	1	Toll-like receptor 5	TLR5	sp|O60602|TLR5_HUMAN Toll-like receptor 5 OS=Homo sapiens OX=9606 GN=TLR5 PE=1 SV=4	1	1	1	1	1	1	1	1	1	1	1	1	1	1	1	1	1	1	1	1	1	1	0.8	0.8	0.8	97.832	858	858	0.0088195	1.4677	By MS/MS	By matching	By matching	By MS/MS	By MS/MS	By MS/MS	0.8	0.8	0.8	0.8	0.8	0.8
O60603	O60603	3	3	3	Toll-like receptor 2	TLR2	sp|O60603|TLR2_HUMAN Toll-like receptor 2 OS=Homo sapiens OX=9606 GN=TLR2 PE=1 SV=1	1	3	3	3	3	2	2	2	1	2	3	2	2	2	1	2	3	2	2	2	1	2	4.1	4.1	4.1	89.837	784	784	0.0008316	3.7006	By MS/MS	By MS/MS	By MS/MS	By matching	By matching	By MS/MS	4.1	2.7	2.8	2.8	1.3	2.7
O60610	O60610	23	23	23	Protein diaphanous homolog 1	DIAPH1	sp|O60610|DIAP1_HUMAN Protein diaphanous homolog 1 OS=Homo sapiens OX=9606 GN=DIAPH1 PE=1 SV=2	1	23	23	23	22	22	23	21	20	20	22	22	23	21	20	20	22	22	23	21	20	20	21.3	21.3	21.3	141.35	1272	1272	0	184.6	By MS/MS	By MS/MS	By MS/MS	By MS/MS	By MS/MS	By MS/MS	20.4	20.4	21.3	19.8	19.3	19.3
O60635	O60635	5	5	5	Tetraspanin-1	TSPAN1	sp|O60635|TSN1_HUMAN Tetraspanin-1 OS=Homo sapiens OX=9606 GN=TSPAN1 PE=1 SV=2	1	5	5	5	5	5	5	5	5	5	5	5	5	5	5	5	5	5	5	5	5	5	32.8	32.8	32.8	26.301	241	241	0	137.82	By MS/MS	By MS/MS	By MS/MS	By MS/MS	By MS/MS	By MS/MS	32.8	32.8	32.8	32.8	32.8	32.8
O60636	O60636	1	1	1	Tetraspanin-2	TSPAN2	sp|O60636|TSN2_HUMAN Tetraspanin-2 OS=Homo sapiens OX=9606 GN=TSPAN2 PE=1 SV=2	1	1	1	1	0	1	1	1	1	1	0	1	1	1	1	1	0	1	1	1	1	1	5.4	5.4	5.4	24.147	221	221	0	10.027		By matching	By matching	By MS/MS	By MS/MS	By MS/MS	0	5.4	5.4	5.4	5.4	5.4
O60637	O60637	1	1	1	Tetraspanin-3	TSPAN3	sp|O60637|TSN3_HUMAN Tetraspanin-3 OS=Homo sapiens OX=9606 GN=TSPAN3 PE=2 SV=1	1	1	1	1	1	1	1	1	1	1	1	1	1	1	1	1	1	1	1	1	1	1	2.8	2.8	2.8	28.017	253	253	0.0075368	1.5209	By MS/MS	By MS/MS	By MS/MS	By MS/MS	By MS/MS	By MS/MS	2.8	2.8	2.8	2.8	2.8	2.8
O60645	O60645	8	8	8	Exocyst complex component 3	EXOC3	sp|O60645|EXOC3_HUMAN Exocyst complex component 3 OS=Homo sapiens OX=9606 GN=EXOC3 PE=1 SV=3	1	8	8	8	5	6	6	7	8	8	5	6	6	7	8	8	5	6	6	7	8	8	13	13	13	85.566	745	745	0	22.822	By MS/MS	By MS/MS	By MS/MS	By MS/MS	By MS/MS	By MS/MS	7.4	10.1	9.7	11.5	13	13
O60658	O60658	15	15	14	High affinity cAMP-specific and IBMX-insensitive 3,5-cyclic phosphodiesterase 8A	PDE8A	sp|O60658|PDE8A_HUMAN High affinity cAMP-specific and IBMX-insensitive 3,5-cyclic phosphodiesterase 8A OS=Homo sapiens OX=9606 GN=PDE8A PE=1 SV=2	1	15	15	14	11	11	13	14	13	13	11	11	13	14	13	13	10	10	12	13	12	13	24.1	24.1	22.7	93.303	829	829	0	198.05	By MS/MS	By MS/MS	By MS/MS	By MS/MS	By MS/MS	By MS/MS	19.8	18.1	22.7	24.1	19.8	22.7
O60664	O60664	8	8	8	Perilipin-3	PLIN3	sp|O60664|PLIN3_HUMAN Perilipin-3 OS=Homo sapiens OX=9606 GN=PLIN3 PE=1 SV=3	1	8	8	8	7	7	8	8	8	6	7	7	8	8	8	6	7	7	8	8	8	6	23.5	23.5	23.5	47.074	434	434	0	49.641	By MS/MS	By MS/MS	By MS/MS	By MS/MS	By MS/MS	By MS/MS	21.9	21.9	23.5	23.5	23.5	17.5
O60701	O60701	17	17	17	UDP-glucose 6-dehydrogenase	UGDH	sp|O60701|UGDH_HUMAN UDP-glucose 6-dehydrogenase OS=Homo sapiens OX=9606 GN=UGDH PE=1 SV=1	1	17	17	17	17	16	17	15	14	15	17	16	17	15	14	15	17	16	17	15	14	15	35.2	35.2	35.2	55.023	494	494	0	87.364	By MS/MS	By MS/MS	By MS/MS	By MS/MS	By MS/MS	By MS/MS	35.2	35.2	35.2	31.8	30.4	31.8
O60716	O60716	7	7	7	Catenin delta-1	CTNND1	sp|O60716|CTND1_HUMAN Catenin delta-1 OS=Homo sapiens OX=9606 GN=CTNND1 PE=1 SV=1	1	7	7	7	6	5	5	7	6	4	6	5	5	7	6	4	6	5	5	7	6	4	12.9	12.9	12.9	108.17	968	968	0	26.693	By MS/MS	By MS/MS	By MS/MS	By MS/MS	By MS/MS	By MS/MS	9.9	8.8	8.6	12.9	10.5	6.4
O60749	O60749	14	14	13	Sorting nexin-2	SNX2	sp|O60749|SNX2_HUMAN Sorting nexin-2 OS=Homo sapiens OX=9606 GN=SNX2 PE=1 SV=2	1	14	14	13	13	12	12	11	12	13	13	12	12	11	12	13	12	11	12	11	11	12	30.1	30.1	28.1	58.47	519	519	0	55.513	By MS/MS	By MS/MS	By MS/MS	By MS/MS	By MS/MS	By MS/MS	27.4	25.2	25.4	23.5	25.2	27.4
O60763	O60763	4	4	4	General vesicular transport factor p115	USO1	sp|O60763|USO1_HUMAN General vesicular transport factor p115 OS=Homo sapiens OX=9606 GN=USO1 PE=1 SV=2	1	4	4	4	4	4	4	1	3	4	4	4	4	1	3	4	4	4	4	1	3	4	4.7	4.7	4.7	107.89	962	962	0	8.628	By MS/MS	By MS/MS	By MS/MS	By matching	By matching	By MS/MS	4.7	4.7	4.7	1.6	3.4	4.7
O60784	O60784	7	7	7	Target of Myb protein 1	TOM1	sp|O60784|TOM1_HUMAN Target of Myb1 membrane trafficking protein OS=Homo sapiens OX=9606 GN=TOM1 PE=1 SV=2	1	7	7	7	7	6	6	7	6	6	7	6	6	7	6	6	7	6	6	7	6	6	16.5	16.5	16.5	53.818	492	492	0	21.677	By MS/MS	By MS/MS	By MS/MS	By MS/MS	By MS/MS	By MS/MS	16.5	16.1	16.1	16.5	12.4	16.1
Q99880;Q99879;Q99877;Q93079;Q5QNW6;P62807;P58876;P57053;O60814;Q96A08;A0A2R8Y619	Q99880;Q99879;Q99877;Q93079;Q5QNW6;P62807;P58876;P57053;O60814;Q96A08	6;6;6;6;6;6;6;6;6;3;2	6;6;6;6;6;6;6;6;6;3;2	2;2;2;2;2;2;2;2;2;0;0	Histone H2B type 1-L;Histone H2B type 1-M;Histone H2B type 1-N;Histone H2B type 1-H;Histone H2B type 2-F;Histone H2B type 1-C/E/F/G/I;Histone H2B type 1-D;Histone H2B type F-S;Histone H2B type 1-K;Histone H2B type 1-A	HIST1H2BL;HIST1H2BM;HIST1H2BN;HIST1H2BH;HIST2H2BF;HIST1H2BC;HIST1H2BD;H2BFS;HIST1H2BK;HIST1H2BA	sp|Q99880|H2B1L_HUMAN Histone H2B type 1-L OS=Homo sapiens OX=9606 GN=H2BC13 PE=1 SV=3;sp|Q99879|H2B1M_HUMAN Histone H2B type 1-M OS=Homo sapiens OX=9606 GN=H2BC14 PE=1 SV=3;sp|Q99877|H2B1N_HUMAN Histone H2B type 1-N OS=Homo sapiens OX=9606 GN=H2BC15 PE=1	11	6	6	2	6	6	5	5	5	4	6	6	5	5	5	4	2	2	2	2	1	0	42.1	42.1	7.9	13.952	126	126;126;126;126;126;126;126;126;126;127;122	0	30.165	By MS/MS	By MS/MS	By MS/MS	By MS/MS	By MS/MS	By MS/MS	42.1	42.1	30.2	30.2	41.3	34.1
O60825	O60825	4	4	4	6-phosphofructo-2-kinase/fructose-2,6-bisphosphatase 2;6-phosphofructo-2-kinase;Fructose-2,6-bisphosphatase	PFKFB2	sp|O60825|F262_HUMAN 6-phosphofructo-2-kinase/fructose-2,6-bisphosphatase 2 OS=Homo sapiens OX=9606 GN=PFKFB2 PE=1 SV=2	1	4	4	4	2	4	3	2	2	2	2	4	3	2	2	2	2	4	3	2	2	2	8.9	8.9	8.9	58.476	505	505	0	8.1161	By MS/MS	By MS/MS	By MS/MS	By MS/MS	By MS/MS	By MS/MS	4.8	8.9	6.9	4.8	4.8	4.8
O60826	O60826	7	7	7	Coiled-coil domain-containing protein 22	CCDC22	sp|O60826|CCD22_HUMAN Coiled-coil domain-containing protein 22 OS=Homo sapiens OX=9606 GN=CCDC22 PE=1 SV=1	1	7	7	7	6	7	7	4	1	3	6	7	7	4	1	3	6	7	7	4	1	3	14.8	14.8	14.8	70.755	627	627	0	19.514	By MS/MS	By MS/MS	By MS/MS	By MS/MS	By matching	By MS/MS	11.3	14.8	14.8	7.5	1.6	5.6
O60879	O60879	13	13	13	Protein diaphanous homolog 2	DIAPH2	sp|O60879|DIAP2_HUMAN Protein diaphanous homolog 2 OS=Homo sapiens OX=9606 GN=DIAPH2 PE=1 SV=1	1	13	13	13	10	10	12	6	7	8	10	10	12	6	7	8	10	10	12	6	7	8	15	15	15	125.57	1101	1101	0	39.554	By MS/MS	By MS/MS	By MS/MS	By MS/MS	By MS/MS	By MS/MS	12.3	10.7	14.1	7.7	8.4	9.6
O60884	O60884	13	13	13	DnaJ homolog subfamily A member 2	DNAJA2	sp|O60884|DNJA2_HUMAN DnaJ homolog subfamily A member 2 OS=Homo sapiens OX=9606 GN=DNAJA2 PE=1 SV=1	1	13	13	13	12	13	12	10	11	11	12	13	12	10	11	11	12	13	12	10	11	11	36.9	36.9	36.9	45.745	412	412	0	95.43	By MS/MS	By MS/MS	By MS/MS	By MS/MS	By MS/MS	By MS/MS	32.5	36.9	35	28.2	30.1	30.1
O60888	O60888	2	2	2	Protein CutA	CUTA	sp|O60888|CUTA_HUMAN Protein CutA OS=Homo sapiens OX=9606 GN=CUTA PE=1 SV=2	1	2	2	2	1	1	2	1	1	2	1	1	2	1	1	2	1	1	2	1	1	2	15.6	15.6	15.6	19.116	179	179	0	5.4696	By MS/MS	By MS/MS	By MS/MS	By MS/MS	By MS/MS	By MS/MS	7.8	7.8	15.6	7.8	7.8	15.6
O60925	O60925	2	2	2	Prefoldin subunit 1	PFDN1	sp|O60925|PFD1_HUMAN Prefoldin subunit 1 OS=Homo sapiens OX=9606 GN=PFDN1 PE=1 SV=2	1	2	2	2	2	2	2	2	1	2	2	2	2	2	1	2	2	2	2	2	1	2	13.9	13.9	13.9	14.21	122	122	0.0011696	2.829	By MS/MS	By MS/MS	By MS/MS	By MS/MS	By matching	By MS/MS	13.9	13.9	13.9	13.9	8.2	13.9
O60936	O60936	3	3	3	Nucleolar protein 3	NOL3	sp|O60936|NOL3_HUMAN Nucleolar protein 3 OS=Homo sapiens OX=9606 GN=NOL3 PE=1 SV=2	1	3	3	3	2	3	2	2	3	3	2	3	2	2	3	3	2	3	2	2	3	3	21.2	21.2	21.2	22.629	208	208	0	15.493	By MS/MS	By MS/MS	By MS/MS	By MS/MS	By MS/MS	By MS/MS	16.3	21.2	16.3	16.3	21.2	21.2
O75015;P08637	O75015;P08637	1;1	1;1	1;1	Low affinity immunoglobulin gamma Fc region receptor III-B;Low affinity immunoglobulin gamma Fc region receptor III-A	FCGR3B;FCGR3A	sp|O75015|FCG3B_HUMAN Low affinity immunoglobulin gamma Fc region receptor III-B OS=Homo sapiens OX=9606 GN=FCGR3B PE=1 SV=2;sp|P08637|FCG3A_HUMAN Low affinity immunoglobulin gamma Fc region receptor III-A OS=Homo sapiens OX=9606 GN=FCGR3A PE=1 SV=2	2	1	1	1	1	1	1	0	1	1	1	1	1	0	1	1	1	1	1	0	1	1	3.4	3.4	3.4	26.216	233	233;254	0.0011705	2.8398	By MS/MS	By MS/MS	By MS/MS		By matching	By MS/MS	3.4	3.4	3.4	0	3.4	3.4
O75044;P0DMP2;P0DJJ0	O75044;P0DMP2;P0DJJ0	12;7;6	12;7;6	11;7;6	SLIT-ROBO Rho GTPase-activating protein 2;SLIT-ROBO Rho GTPase-activating protein 2B;SLIT-ROBO Rho GTPase-activating protein 2C	SRGAP2;SRGAP2B;SRGAP2C	sp|O75044|SRGP2_HUMAN SLIT-ROBO Rho GTPase-activating protein 2 OS=Homo sapiens OX=9606 GN=SRGAP2 PE=1 SV=3;sp|P0DMP2|SRG2B_HUMAN SLIT-ROBO Rho GTPase-activating protein 2B OS=Homo sapiens OX=9606 GN=SRGAP2B PE=3 SV=1;sp|P0DJJ0|SRG2C_HUMAN SLIT-ROBO Rho GT	3	12	12	11	9	7	5	9	8	9	9	7	5	9	8	9	8	6	4	8	7	8	14.8	14.8	13.6	120.87	1071	1071;458;459	0	36.943	By MS/MS	By MS/MS	By MS/MS	By MS/MS	By MS/MS	By MS/MS	11.2	8.7	6.3	11.7	9.5	11.3
O75083	O75083	21	21	21	WD repeat-containing protein 1	WDR1	sp|O75083|WDR1_HUMAN WD repeat-containing protein 1 OS=Homo sapiens OX=9606 GN=WDR1 PE=1 SV=4	1	21	21	21	20	20	19	20	20	20	20	20	19	20	20	20	20	20	19	20	20	20	47.9	47.9	47.9	66.193	606	606	0	323.31	By MS/MS	By MS/MS	By MS/MS	By MS/MS	By MS/MS	By MS/MS	46.7	47.9	46.4	47.9	46.5	44.1
O75110;O43861	O75110	15;2	15;2	15;2	Probable phospholipid-transporting ATPase IIA	ATP9A	sp|O75110|ATP9A_HUMAN Probable phospholipid-transporting ATPase IIA OS=Homo sapiens OX=9606 GN=ATP9A PE=1 SV=3	2	15	15	15	13	12	13	12	13	11	13	12	13	12	13	11	13	12	13	12	13	11	15.7	15.7	15.7	118.58	1047	1047;1147	0	61.113	By MS/MS	By MS/MS	By MS/MS	By MS/MS	By MS/MS	By MS/MS	14	13.3	14	13.3	13.6	11.9
O75116	O75116	11	8	8	Rho-associated protein kinase 2	ROCK2	sp|O75116|ROCK2_HUMAN Rho-associated protein kinase 2 OS=Homo sapiens OX=9606 GN=ROCK2 PE=1 SV=4	1	11	8	8	11	7	8	5	8	8	8	6	5	4	6	6	8	6	5	4	6	6	10	7.3	7.3	160.9	1388	1388	0	20.643	By MS/MS	By MS/MS	By MS/MS	By matching	By MS/MS	By MS/MS	10	6.7	7.6	4.3	7.3	7.6
O75128	O75128	4	4	4	Protein cordon-bleu	COBL	sp|O75128|COBL_HUMAN Protein cordon-bleu OS=Homo sapiens OX=9606 GN=COBL PE=1 SV=2	1	4	4	4	2	3	3	3	3	3	2	3	3	3	3	3	2	3	3	3	3	3	4.4	4.4	4.4	135.62	1261	1261	0	15.112	By MS/MS	By MS/MS	By MS/MS	By MS/MS	By MS/MS	By MS/MS	2.9	3.6	3.6	3.8	3	3.6
O75131;Q9UBL6	O75131	18;1	18;1	17;0	Copine-3	CPNE3	sp|O75131|CPNE3_HUMAN Copine-3 OS=Homo sapiens OX=9606 GN=CPNE3 PE=1 SV=1	2	18	18	17	18	18	18	18	18	18	18	18	18	18	18	18	17	17	17	17	17	17	30.9	30.9	29.2	60.13	537	537;633	0	166.37	By MS/MS	By MS/MS	By MS/MS	By MS/MS	By MS/MS	By MS/MS	30.9	30.9	30.9	30.9	30.9	30.9
O75146	O75146	6	6	6	Huntingtin-interacting protein 1-related protein	HIP1R	sp|O75146|HIP1R_HUMAN Huntingtin-interacting protein 1-related protein OS=Homo sapiens OX=9606 GN=HIP1R PE=1 SV=2	1	6	6	6	5	4	4	4	4	5	5	4	4	4	4	5	5	4	4	4	4	5	8.3	8.3	8.3	119.39	1068	1068	0	20.708	By MS/MS	By MS/MS	By MS/MS	By MS/MS	By MS/MS	By MS/MS	6.9	5.9	5.5	5.5	5.5	6.9
O75165	O75165	15	15	15	DnaJ homolog subfamily C member 13	DNAJC13	sp|O75165|DJC13_HUMAN DnaJ homolog subfamily C member 13 OS=Homo sapiens OX=9606 GN=DNAJC13 PE=1 SV=5	1	15	15	15	13	14	15	5	6	7	13	14	15	5	6	7	13	14	15	5	6	7	7.9	7.9	7.9	254.41	2243	2243	0	27.485	By MS/MS	By MS/MS	By MS/MS	By MS/MS	By MS/MS	By MS/MS	6.2	7.6	7.9	2.7	3.4	3.1
O75167	O75167	5	5	5	Phosphatase and actin regulator 2	PHACTR2	sp|O75167|PHAR2_HUMAN Phosphatase and actin regulator 2 OS=Homo sapiens OX=9606 GN=PHACTR2 PE=1 SV=2	1	5	5	5	3	3	3	4	3	3	3	3	3	4	3	3	3	3	3	4	3	3	10.9	10.9	10.9	69.699	634	634	0	11.036	By MS/MS	By MS/MS	By MS/MS	By MS/MS	By MS/MS	By MS/MS	7.4	7.4	7.4	9.3	7.4	6.5
O75190;Q8WWF6	O75190;Q8WWF6	2;1	2;1	2;1	DnaJ homolog subfamily B member 6;DnaJ homolog subfamily B member 3	DNAJB6;DNAJB3	sp|O75190|DNJB6_HUMAN DnaJ homolog subfamily B member 6 OS=Homo sapiens OX=9606 GN=DNAJB6 PE=1 SV=2;sp|Q8WWF6|DNJB3_HUMAN DnaJ homolog subfamily B member 3 OS=Homo sapiens OX=9606 GN=DNAJB3 PE=1 SV=1	2	2	2	2	2	1	1	0	2	1	2	1	1	0	2	1	2	1	1	0	2	1	6.7	6.7	6.7	36.087	326	326;145	0	19.798	By MS/MS	By MS/MS	By MS/MS		By MS/MS	By MS/MS	6.7	2.8	2.8	0	6.7	4
O75191	O75191	2	2	2	Xylulose kinase	XYLB	sp|O75191|XYLB_HUMAN Xylulose kinase OS=Homo sapiens OX=9606 GN=XYLB PE=1 SV=3	1	2	2	2	2	2	2	0	1	1	2	2	2	0	1	1	2	2	2	0	1	1	6	6	6	58.382	536	536	0	8.7985	By MS/MS	By MS/MS	By MS/MS		By matching	By matching	6	6	6	0	2.8	2.8
O75223	O75223	6	6	6	Gamma-glutamylcyclotransferase	GGCT	sp|O75223|GGCT_HUMAN Gamma-glutamylcyclotransferase OS=Homo sapiens OX=9606 GN=GGCT PE=1 SV=1	1	6	6	6	5	4	6	5	5	5	5	4	6	5	5	5	5	4	6	5	5	5	25.5	25.5	25.5	21.007	188	188	0	11.411	By MS/MS	By MS/MS	By MS/MS	By MS/MS	By MS/MS	By MS/MS	20.7	20.7	25.5	25.5	25.5	25.5
O75264	O75264	10	10	10	Small integral membrane protein 24	SMIM24	sp|O75264|SIM24_HUMAN Small integral membrane protein 24 OS=Homo sapiens OX=9606 GN=SMIM24 PE=2 SV=2	1	10	10	10	8	10	9	9	8	9	8	10	9	9	8	9	8	10	9	9	8	9	38.5	38.5	38.5	14.964	130	130	0	160.24	By MS/MS	By MS/MS	By MS/MS	By MS/MS	By MS/MS	By MS/MS	38.5	38.5	38.5	38.5	38.5	38.5
O75309	O75309	8	8	8	Cadherin-16	CDH16	sp|O75309|CAD16_HUMAN Cadherin-16 OS=Homo sapiens OX=9606 GN=CDH16 PE=1 SV=1	1	8	8	8	5	5	4	6	6	6	5	5	4	6	6	6	5	5	4	6	6	6	12.7	12.7	12.7	89.922	829	829	0	14.116	By MS/MS	By MS/MS	By MS/MS	By MS/MS	By MS/MS	By MS/MS	8	8.1	6.3	9.7	9.4	9.4
O75312	O75312	2	2	2	Zinc finger protein ZPR1	ZPR1	sp|O75312|ZPR1_HUMAN Zinc finger protein ZPR1 OS=Homo sapiens OX=9606 GN=ZPR1 PE=1 SV=1	1	2	2	2	1	1	1	1	1	1	1	1	1	1	1	1	1	1	1	1	1	1	4.6	4.6	4.6	50.925	459	459	0.0035524	1.9046	By matching	By MS/MS	By MS/MS	By matching	By matching	By matching	2.6	2.6	2	2.6	2.6	2.6
O75317	O75317	2	2	1	Ubiquitin carboxyl-terminal hydrolase 12	USP12	sp|O75317|UBP12_HUMAN Ubiquitin carboxyl-terminal hydrolase 12 OS=Homo sapiens OX=9606 GN=USP12 PE=1 SV=2	1	2	2	1	2	2	1	2	0	2	2	2	1	2	0	2	1	1	1	1	0	1	5.7	5.7	3.5	42.857	370	370	0.0008617	4.1838	By MS/MS	By MS/MS	By matching	By MS/MS		By MS/MS	5.7	5.7	3.5	5.7	0	5.7
O75339	O75339	2	2	2	Cartilage intermediate layer protein 1;Cartilage intermediate layer protein 1 C1;Cartilage intermediate layer protein 1 C2	CILP	sp|O75339|CILP1_HUMAN Cartilage intermediate layer protein 1 OS=Homo sapiens OX=9606 GN=CILP PE=1 SV=4	1	2	2	2	0	1	0	2	1	1	0	1	0	2	1	1	0	1	0	2	1	1	1.6	1.6	1.6	132.56	1184	1184	0.0049505	1.8412		By matching		By MS/MS	By MS/MS	By MS/MS	0	0.8	0	1.6	0.8	0.8
O75340	O75340	8	8	8	Programmed cell death protein 6	PDCD6	sp|O75340|PDCD6_HUMAN Programmed cell death protein 6 OS=Homo sapiens OX=9606 GN=PDCD6 PE=1 SV=1	1	8	8	8	7	8	8	8	7	7	7	8	8	8	7	7	7	8	8	8	7	7	31.4	31.4	31.4	21.868	191	191	0	49.44	By MS/MS	By MS/MS	By MS/MS	By MS/MS	By MS/MS	By MS/MS	31.4	31.4	31.4	31.4	31.4	31.4
O75347	O75347	5	5	5	Tubulin-specific chaperone A	TBCA	sp|O75347|TBCA_HUMAN Tubulin-specific chaperone A OS=Homo sapiens OX=9606 GN=TBCA PE=1 SV=3	1	5	5	5	5	5	5	5	5	5	5	5	5	5	5	5	5	5	5	5	5	5	37	37	37	12.855	108	108	0	10.601	By MS/MS	By MS/MS	By MS/MS	By MS/MS	By MS/MS	By MS/MS	37	37	37	37	37	37
O75348;O95670	O75348	6;1	6;1	6;1	V-type proton ATPase subunit G 1	ATP6V1G1	sp|O75348|VATG1_HUMAN V-type proton ATPase subunit G 1 OS=Homo sapiens OX=9606 GN=ATP6V1G1 PE=1 SV=3	2	6	6	6	5	6	6	6	6	5	5	6	6	6	6	5	5	6	6	6	6	5	46.6	46.6	46.6	13.757	118	118;118	0	73.709	By MS/MS	By MS/MS	By MS/MS	By MS/MS	By MS/MS	By MS/MS	39.8	46.6	46.6	46.6	46.6	39
O75351	O75351	25	25	21	Vacuolar protein sorting-associated protein 4B	VPS4B	sp|O75351|VPS4B_HUMAN Vacuolar protein sorting-associated protein 4B OS=Homo sapiens OX=9606 GN=VPS4B PE=1 SV=2	1	25	25	21	21	21	24	23	22	23	21	21	24	23	22	23	17	17	20	19	18	19	54.7	54.7	46.8	49.301	444	444	0	279.86	By MS/MS	By MS/MS	By MS/MS	By MS/MS	By MS/MS	By MS/MS	46.2	42.8	51.1	50.7	47.1	50.7
O75355	O75355	5	5	5	Ectonucleoside triphosphate diphosphohydrolase 3	ENTPD3	sp|O75355|ENTP3_HUMAN Ectonucleoside triphosphate diphosphohydrolase 3 OS=Homo sapiens OX=9606 GN=ENTPD3 PE=1 SV=2	1	5	5	5	5	5	3	5	5	5	5	5	3	5	5	5	5	5	3	5	5	5	11.7	11.7	11.7	59.105	529	529	0	10.566	By MS/MS	By MS/MS	By MS/MS	By MS/MS	By MS/MS	By MS/MS	11.7	11.7	7	11.7	11.7	11.7
O75363	O75363	17	17	17	Breast carcinoma-amplified sequence 1	BCAS1	sp|O75363|BCAS1_HUMAN Breast carcinoma-amplified sequence 1 OS=Homo sapiens OX=9606 GN=BCAS1 PE=1 SV=2	1	17	17	17	16	16	16	16	16	16	16	16	16	16	16	16	16	16	16	16	16	16	42.8	42.8	42.8	61.708	584	584	0	240.66	By MS/MS	By MS/MS	By MS/MS	By MS/MS	By MS/MS	By MS/MS	42	42	41.1	41.1	41.1	41.1
O75365	O75365	1	1	1	Protein tyrosine phosphatase type IVA 3	PTP4A3	sp|O75365|TP4A3_HUMAN Protein tyrosine phosphatase type IVA 3 OS=Homo sapiens OX=9606 GN=PTP4A3 PE=1 SV=2	1	1	1	1	1	1	1	1	1	1	1	1	1	1	1	1	1	1	1	1	1	1	5.8	5.8	5.8	19.535	173	173	0.0068752	1.5547	By MS/MS	By MS/MS	By matching	By matching	By MS/MS	By matching	5.8	5.8	5.8	5.8	5.8	5.8
O75367	O75367	1	1	1	Core histone macro-H2A.1	H2AFY	sp|O75367|H2AY_HUMAN Core histone macro-H2A.1 OS=Homo sapiens OX=9606 GN=MACROH2A1 PE=1 SV=5	1	1	1	1	0	1	1	1	1	1	0	1	1	1	1	1	0	1	1	1	1	1	5.4	5.4	5.4	39.183	369	369	0.0018519	2.2399		By MS/MS	By MS/MS	By MS/MS	By matching	By MS/MS	0	5.4	5.4	5.4	5.4	5.4
O75368	O75368	4	4	4	SH3 domain-binding glutamic acid-rich-like protein	SH3BGRL	sp|O75368|SH3L1_HUMAN Adapter SH3BGRL OS=Homo sapiens OX=9606 GN=SH3BGRL PE=1 SV=1	1	4	4	4	4	4	4	4	4	4	4	4	4	4	4	4	4	4	4	4	4	4	31.6	31.6	31.6	12.774	114	114	0	16.791	By MS/MS	By MS/MS	By MS/MS	By MS/MS	By MS/MS	By MS/MS	31.6	31.6	31.6	31.6	31.6	31.6
O75369;Q14315	O75369	66;2	66;2	65;1	Filamin-B	FLNB	sp|O75369|FLNB_HUMAN Filamin-B OS=Homo sapiens OX=9606 GN=FLNB PE=1 SV=2	2	66	66	65	56	49	53	52	56	52	56	49	53	52	56	52	55	48	52	52	55	51	36.3	36.3	35.9	278.16	2602	2602;2725	0	323.31	By MS/MS	By MS/MS	By MS/MS	By MS/MS	By MS/MS	By MS/MS	31.9	28	28.2	29.5	31.8	30
O75386	O75386	3	3	3	Tubby-related protein 3	TULP3	sp|O75386|TULP3_HUMAN Tubby-related protein 3 OS=Homo sapiens OX=9606 GN=TULP3 PE=1 SV=2	1	3	3	3	3	2	1	2	1	2	3	2	1	2	1	2	3	2	1	2	1	2	8.8	8.8	8.8	49.642	442	442	0.00082474	3.6259	By MS/MS	By matching	By MS/MS	By matching	By MS/MS	By matching	8.8	5.4	2.5	5.4	2.9	5.4
O75436	O75436	6	6	6	Vacuolar protein sorting-associated protein 26A	VPS26A	sp|O75436|VP26A_HUMAN Vacuolar protein sorting-associated protein 26A OS=Homo sapiens OX=9606 GN=VPS26A PE=1 SV=2	1	6	6	6	5	5	5	4	3	5	5	5	5	4	3	5	5	5	5	4	3	5	22.3	22.3	22.3	38.169	327	327	0	30.238	By MS/MS	By MS/MS	By MS/MS	By MS/MS	By MS/MS	By MS/MS	19.9	19.9	19.9	15.9	12.5	18.3
O75487	O75487	2	2	2	Glypican-4;Secreted glypican-4	GPC4	sp|O75487|GPC4_HUMAN Glypican-4 OS=Homo sapiens OX=9606 GN=GPC4 PE=1 SV=4	1	2	2	2	1	0	0	2	1	2	1	0	0	2	1	2	1	0	0	2	1	2	4.3	4.3	4.3	62.411	556	556	0.0011687	2.823	By MS/MS			By MS/MS	By matching	By MS/MS	1.6	0	0	4.3	2.7	4.3
O75503	O75503	2	2	2	Ceroid-lipofuscinosis neuronal protein 5	CLN5	sp|O75503|CLN5_HUMAN Ceroid-lipofuscinosis neuronal protein 5 OS=Homo sapiens OX=9606 GN=CLN5 PE=1 SV=2	1	2	2	2	2	2	2	0	2	0	2	2	2	0	2	0	2	2	2	0	2	0	6.1	6.1	6.1	41.496	358	358	0.00043403	4.3028	By MS/MS	By MS/MS	By MS/MS		By MS/MS		6.1	6.1	6.1	0	6.1	0
O75506	O75506	1	1	1	Heat shock factor-binding protein 1	HSBP1	sp|O75506|HSBP1_HUMAN Heat shock factor-binding protein 1 OS=Homo sapiens OX=9606 GN=HSBP1 PE=1 SV=1	1	1	1	1	1	1	1	1	1	1	1	1	1	1	1	1	1	1	1	1	1	1	14.5	14.5	14.5	8.5435	76	76	0.0011751	2.9104	By MS/MS	By MS/MS	By MS/MS	By MS/MS	By MS/MS	By MS/MS	14.5	14.5	14.5	14.5	14.5	14.5
O75508	O75508	1	1	1	Claudin-11	CLDN11	sp|O75508|CLD11_HUMAN Claudin-11 OS=Homo sapiens OX=9606 GN=CLDN11 PE=1 SV=2	1	1	1	1	1	1	1	1	1	1	1	1	1	1	1	1	1	1	1	1	1	1	6.8	6.8	6.8	21.993	207	207	0	7.8298	By MS/MS	By MS/MS	By MS/MS	By MS/MS	By MS/MS	By MS/MS	6.8	6.8	6.8	6.8	6.8	6.8
O75531	O75531	3	3	3	Barrier-to-autointegration factor;Barrier-to-autointegration factor, N-terminally processed	BANF1	sp|O75531|BAF_HUMAN Barrier-to-autointegration factor OS=Homo sapiens OX=9606 GN=BANF1 PE=1 SV=1	1	3	3	3	3	3	3	3	3	3	3	3	3	3	3	3	3	3	3	3	3	3	37.1	37.1	37.1	10.058	89	89	0	15.53	By MS/MS	By MS/MS	By MS/MS	By MS/MS	By MS/MS	By MS/MS	37.1	37.1	37.1	37.1	37.1	37.1
O75534	O75534	4	4	4	Cold shock domain-containing protein E1	CSDE1	sp|O75534|CSDE1_HUMAN Cold shock domain-containing protein E1 OS=Homo sapiens OX=9606 GN=CSDE1 PE=1 SV=2	1	4	4	4	3	3	2	3	3	2	3	3	2	3	3	2	3	3	2	3	3	2	5.6	5.6	5.6	88.884	798	798	0	4.4131	By MS/MS	By MS/MS	By MS/MS	By MS/MS	By MS/MS	By MS/MS	4.3	4.3	3	3.5	4.3	3
O75558	O75558	4	4	4	Syntaxin-11	STX11	sp|O75558|STX11_HUMAN Syntaxin-11 OS=Homo sapiens OX=9606 GN=STX11 PE=1 SV=1	1	4	4	4	3	3	3	3	4	3	3	3	3	3	4	3	3	3	3	3	4	3	20.2	20.2	20.2	33.195	287	287	0	32.449	By MS/MS	By MS/MS	By MS/MS	By MS/MS	By MS/MS	By MS/MS	17.1	17.1	17.1	17.1	20.2	15.3
O75594	O75594	1	1	1	Peptidoglycan recognition protein 1	PGLYRP1	sp|O75594|PGRP1_HUMAN Peptidoglycan recognition protein 1 OS=Homo sapiens OX=9606 GN=PGLYRP1 PE=1 SV=1	1	1	1	1	1	1	1	1	1	1	1	1	1	1	1	1	1	1	1	1	1	1	7.7	7.7	7.7	21.731	196	196	0	43.665	By MS/MS	By matching	By MS/MS	By MS/MS	By MS/MS	By MS/MS	7.7	7.7	7.7	7.7	7.7	7.7
O75608	O75608	3	3	3	Acyl-protein thioesterase 1	LYPLA1	sp|O75608|LYPA1_HUMAN Acyl-protein thioesterase 1 OS=Homo sapiens OX=9606 GN=LYPLA1 PE=1 SV=1	1	3	3	3	3	3	3	3	3	3	3	3	3	3	3	3	3	3	3	3	3	3	16.1	16.1	16.1	24.669	230	230	0	76.438	By MS/MS	By MS/MS	By MS/MS	By MS/MS	By MS/MS	By MS/MS	16.1	16.1	16.1	16.1	16.1	16.1
O75631	O75631	5	5	5	Uroplakin-3a	UPK3A	sp|O75631|UPK3A_HUMAN Uroplakin-3a OS=Homo sapiens OX=9606 GN=UPK3A PE=1 SV=3	1	5	5	5	4	4	4	5	4	4	4	4	4	5	4	4	4	4	4	5	4	4	21.6	21.6	21.6	30.669	287	287	0	44.722	By MS/MS	By MS/MS	By MS/MS	By MS/MS	By MS/MS	By MS/MS	17.1	17.1	17.1	21.6	17.1	17.1
O75663	O75663	2	2	2	TIP41-like protein	TIPRL	sp|O75663|TIPRL_HUMAN TIP41-like protein OS=Homo sapiens OX=9606 GN=TIPRL PE=1 SV=2	1	2	2	2	1	1	1	2	1	1	1	1	1	2	1	1	1	1	1	2	1	1	10.3	10.3	10.3	31.444	272	272	0.00079523	3.1087	By MS/MS	By MS/MS	By MS/MS	By MS/MS	By matching	By MS/MS	4.4	4.4	4.4	10.3	4.4	4.4
O75674	O75674	7	7	7	TOM1-like protein 1	TOM1L1	sp|O75674|TM1L1_HUMAN TOM1-like protein 1 OS=Homo sapiens OX=9606 GN=TOM1L1 PE=1 SV=2	1	7	7	7	7	7	7	6	7	7	7	7	7	6	7	7	7	7	7	6	7	7	21.8	21.8	21.8	52.988	476	476	0	82.344	By MS/MS	By MS/MS	By MS/MS	By MS/MS	By MS/MS	By MS/MS	21.8	21.8	21.8	18.5	21.8	21.8
O75688	O75688	2	2	2	Protein phosphatase 1B	PPM1B	sp|O75688|PPM1B_HUMAN Protein phosphatase 1B OS=Homo sapiens OX=9606 GN=PPM1B PE=1 SV=1	1	2	2	2	2	1	2	1	1	1	2	1	2	1	1	1	2	1	2	1	1	1	5.4	5.4	5.4	52.642	479	479	0	6.5894	By matching	By MS/MS	By MS/MS	By MS/MS	By matching	By MS/MS	5.4	2.7	5.4	2.7	2.7	2.7
O75695	O75695	9	9	9	Protein XRP2	RP2	sp|O75695|XRP2_HUMAN Protein XRP2 OS=Homo sapiens OX=9606 GN=RP2 PE=1 SV=4	1	9	9	9	7	7	6	9	8	8	7	7	6	9	8	8	7	7	6	9	8	8	29.1	29.1	29.1	39.641	350	350	0	48.96	By MS/MS	By MS/MS	By MS/MS	By MS/MS	By MS/MS	By MS/MS	20.9	20.9	18.6	29.1	22.9	22.9
O75747	O75747	11	11	11	Phosphatidylinositol 4-phosphate 3-kinase C2 domain-containing subunit gamma	PIK3C2G	sp|O75747|P3C2G_HUMAN Phosphatidylinositol 3-kinase C2 domain-containing subunit gamma OS=Homo sapiens OX=9606 GN=PIK3C2G PE=1 SV=3	1	11	11	11	10	10	9	9	10	7	10	10	9	9	10	7	10	10	9	9	10	7	10.7	10.7	10.7	165.71	1445	1445	0	22.819	By MS/MS	By MS/MS	By MS/MS	By MS/MS	By MS/MS	By MS/MS	10.2	10.2	9.1	9	9.3	6.5
O75781	O75781	6	6	6	Paralemmin-1	PALM	sp|O75781|PALM_HUMAN Paralemmin-1 OS=Homo sapiens OX=9606 GN=PALM PE=1 SV=2	1	6	6	6	6	6	6	5	6	6	6	6	6	5	6	6	6	6	6	5	6	6	19.9	19.9	19.9	42.075	387	387	0	21.728	By MS/MS	By MS/MS	By MS/MS	By MS/MS	By MS/MS	By MS/MS	19.9	19.9	19.9	15	19.9	19.9
O75787	O75787	3	3	3	Renin receptor	ATP6AP2	sp|O75787|RENR_HUMAN Renin receptor OS=Homo sapiens OX=9606 GN=ATP6AP2 PE=1 SV=2	1	3	3	3	3	3	3	3	3	3	3	3	3	3	3	3	3	3	3	3	3	3	7.7	7.7	7.7	39.008	350	350	0	8.0892	By MS/MS	By MS/MS	By MS/MS	By MS/MS	By MS/MS	By MS/MS	7.7	7.7	7.7	7.7	7.7	7.7
O75822	O75822	5	5	5	Eukaryotic translation initiation factor 3 subunit J	EIF3J	sp|O75822|EIF3J_HUMAN Eukaryotic translation initiation factor 3 subunit J OS=Homo sapiens OX=9606 GN=EIF3J PE=1 SV=2	1	5	5	5	2	2	1	2	2	2	2	2	1	2	2	2	2	2	1	2	2	2	27.1	27.1	27.1	29.062	258	258	0	15.883	By MS/MS	By MS/MS	By MS/MS	By MS/MS	By MS/MS	By MS/MS	8.9	14.3	4.3	14.3	8.9	7.8
O75828	O75828	5	3	3	Carbonyl reductase [NADPH] 3	CBR3	sp|O75828|CBR3_HUMAN Carbonyl reductase [NADPH] 3 OS=Homo sapiens OX=9606 GN=CBR3 PE=1 SV=3	1	5	3	3	4	4	4	5	4	4	2	2	2	3	2	2	2	2	2	3	2	2	23.5	13	13	30.85	277	277	0	4.7905	By MS/MS	By MS/MS	By MS/MS	By MS/MS	By MS/MS	By MS/MS	17.7	17.7	17.7	23.5	17.7	17.7
O75832	O75832	5	5	5	26S proteasome non-ATPase regulatory subunit 10	PSMD10	sp|O75832|PSD10_HUMAN 26S proteasome non-ATPase regulatory subunit 10 OS=Homo sapiens OX=9606 GN=PSMD10 PE=1 SV=1	1	5	5	5	4	5	4	4	4	3	4	5	4	4	4	3	4	5	4	4	4	3	27	27	27	24.428	226	226	0	7.6845	By MS/MS	By MS/MS	By MS/MS	By MS/MS	By MS/MS	By MS/MS	27	27	27	27	27	19.5
O75841	O75841	5	5	5	Uroplakin-1b	UPK1B	sp|O75841|UPK1B_HUMAN Uroplakin-1b OS=Homo sapiens OX=9606 GN=UPK1B PE=1 SV=5	1	5	5	5	4	5	4	4	4	4	4	5	4	4	4	4	4	5	4	4	4	4	23.8	23.8	23.8	29.643	260	260	0	27.932	By MS/MS	By MS/MS	By MS/MS	By MS/MS	By MS/MS	By MS/MS	20.4	23.8	20.4	20.4	20.4	20.4
O75844	O75844	6	6	6	CAAX prenyl protease 1 homolog	ZMPSTE24	sp|O75844|FACE1_HUMAN CAAX prenyl protease 1 homolog OS=Homo sapiens OX=9606 GN=ZMPSTE24 PE=1 SV=2	1	6	6	6	6	6	6	3	3	4	6	6	6	3	3	4	6	6	6	3	3	4	13.1	13.1	13.1	54.812	475	475	0	12.251	By MS/MS	By MS/MS	By MS/MS	By MS/MS	By MS/MS	By MS/MS	13.1	13.1	13.1	5.1	5.1	9.3
O75874	O75874	22	22	20	Isocitrate dehydrogenase [NADP] cytoplasmic	IDH1	sp|O75874|IDHC_HUMAN Isocitrate dehydrogenase [NADP] cytoplasmic OS=Homo sapiens OX=9606 GN=IDH1 PE=1 SV=2	1	22	22	20	22	22	20	22	22	22	22	22	20	22	22	22	20	20	19	20	20	20	59.4	59.4	55.6	46.659	414	414	0	323.31	By MS/MS	By MS/MS	By MS/MS	By MS/MS	By MS/MS	By MS/MS	59.4	59.4	55.6	59.4	59.4	59.4
O75882	O75882	10	10	10	Attractin	ATRN	sp|O75882|ATRN_HUMAN Attractin OS=Homo sapiens OX=9606 GN=ATRN PE=1 SV=2	1	10	10	10	6	7	6	9	7	8	6	7	6	9	7	8	6	7	6	9	7	8	8.7	8.7	8.7	158.54	1429	1429	0	75.924	By MS/MS	By MS/MS	By MS/MS	By MS/MS	By MS/MS	By MS/MS	5	6.2	5	8	5.9	6.7
O75884	O75884	3	3	3	Putative hydrolase RBBP9	RBBP9	sp|O75884|RBBP9_HUMAN Serine hydrolase RBBP9 OS=Homo sapiens OX=9606 GN=RBBP9 PE=1 SV=2	1	3	3	3	3	3	3	3	3	3	3	3	3	3	3	3	3	3	3	3	3	3	16.1	16.1	16.1	21	186	186	0	4.41	By MS/MS	By MS/MS	By MS/MS	By MS/MS	By MS/MS	By MS/MS	16.1	16.1	16.1	16.1	16.1	16.1
O75886	O75886	11	11	9	Signal transducing adapter molecule 2	STAM2	sp|O75886|STAM2_HUMAN Signal transducing adapter molecule 2 OS=Homo sapiens OX=9606 GN=STAM2 PE=1 SV=1	1	11	11	9	10	10	10	9	8	9	10	10	10	9	8	9	8	8	8	7	7	8	22.9	22.9	19.2	58.164	525	525	0	81.284	By MS/MS	By MS/MS	By MS/MS	By MS/MS	By MS/MS	By MS/MS	20.4	20.4	20.4	21	15.6	18.7
O75891;Q3SY69	O75891	31;2	31;2	31;2	Cytosolic 10-formyltetrahydrofolate dehydrogenase	ALDH1L1	sp|O75891|AL1L1_HUMAN Cytosolic 10-formyltetrahydrofolate dehydrogenase OS=Homo sapiens OX=9606 GN=ALDH1L1 PE=1 SV=2	2	31	31	31	27	29	29	31	28	29	27	29	29	31	28	29	27	29	29	31	28	29	39.4	39.4	39.4	98.828	902	902;923	0	128.55	By MS/MS	By MS/MS	By MS/MS	By MS/MS	By MS/MS	By MS/MS	35.8	38.1	38.1	39.4	36	37
O75923	O75923	2	1	1	Dysferlin	DYSF	sp|O75923|DYSF_HUMAN Dysferlin OS=Homo sapiens OX=9606 GN=DYSF PE=1 SV=1	1	2	1	1	1	2	1	1	2	1	0	1	1	1	1	1	0	1	1	1	1	1	1.4	0.7	0.7	237.29	2080	2080	0	5.0264	By matching	By matching	By MS/MS	By matching	By matching	By matching	0.7	1.4	0.7	0.7	1.4	0.7
O75935	O75935	2	2	2	Dynactin subunit 3	DCTN3	sp|O75935|DCTN3_HUMAN Dynactin subunit 3 OS=Homo sapiens OX=9606 GN=DCTN3 PE=1 SV=1	1	2	2	2	1	1	2	1	2	2	1	1	2	1	2	2	1	1	2	1	2	2	13.4	13.4	13.4	21.119	186	186	0.00079777	3.1344	By MS/MS	By MS/MS	By MS/MS	By matching	By MS/MS	By MS/MS	9.1	9.1	13.4	4.3	13.4	13.4
O75936	O75936	10	10	10	Gamma-butyrobetaine dioxygenase	BBOX1	sp|O75936|BODG_HUMAN Gamma-butyrobetaine dioxygenase OS=Homo sapiens OX=9606 GN=BBOX1 PE=1 SV=1	1	10	10	10	10	10	10	9	10	9	10	10	10	9	10	9	10	10	10	9	10	9	31	31	31	44.714	387	387	0	181.92	By MS/MS	By MS/MS	By MS/MS	By MS/MS	By MS/MS	By MS/MS	31	31	31	27.6	31	27.6
O75954	O75954	3	3	3	Tetraspanin-9	TSPAN9	sp|O75954|TSN9_HUMAN Tetraspanin-9 OS=Homo sapiens OX=9606 GN=TSPAN9 PE=1 SV=1	1	3	3	3	2	3	3	3	3	3	2	3	3	3	3	3	2	3	3	3	3	3	20.1	20.1	20.1	26.779	239	239	0	11.944	By MS/MS	By MS/MS	By MS/MS	By MS/MS	By MS/MS	By MS/MS	13.8	20.1	20.1	20.1	20.1	20.1
O75955	O75955	19	19	19	Flotillin-1	FLOT1	sp|O75955|FLOT1_HUMAN Flotillin-1 OS=Homo sapiens OX=9606 GN=FLOT1 PE=1 SV=3	1	19	19	19	18	19	18	19	18	17	18	19	18	19	18	17	18	19	18	19	18	17	53.9	53.9	53.9	47.355	427	427	0	199.19	By MS/MS	By MS/MS	By MS/MS	By MS/MS	By MS/MS	By MS/MS	52	53.9	51.5	53.9	52	50.4
O75970	O75970	24	23	23	Multiple PDZ domain protein	MPDZ	sp|O75970|MPDZ_HUMAN Multiple PDZ domain protein OS=Homo sapiens OX=9606 GN=MPDZ PE=1 SV=2	1	24	23	23	21	20	19	23	21	21	20	19	18	22	20	20	20	19	18	22	20	20	15.4	14.9	14.9	221.62	2070	2070	0	77.04	By MS/MS	By MS/MS	By MS/MS	By MS/MS	By MS/MS	By MS/MS	13.7	12.3	12.4	14	13.6	13.7
O76003	O76003	6	6	6	Glutaredoxin-3	GLRX3	sp|O76003|GLRX3_HUMAN Glutaredoxin-3 OS=Homo sapiens OX=9606 GN=GLRX3 PE=1 SV=2	1	6	6	6	4	5	5	5	5	5	4	5	5	5	5	5	4	5	5	5	5	5	21.8	21.8	21.8	37.432	335	335	0	19.516	By MS/MS	By MS/MS	By MS/MS	By MS/MS	By MS/MS	By MS/MS	14	17.6	18.2	17.6	17.6	17.6
O76027	O76027	11	11	11	Annexin A9	ANXA9	sp|O76027|ANXA9_HUMAN Annexin A9 OS=Homo sapiens OX=9606 GN=ANXA9 PE=1 SV=3	1	11	11	11	11	10	8	10	10	10	11	10	8	10	10	10	11	10	8	10	10	10	39.1	39.1	39.1	38.363	345	345	0	64.992	By MS/MS	By MS/MS	By MS/MS	By MS/MS	By MS/MS	By MS/MS	39.1	36.5	31	34.2	36.5	36.5
O76041	O76041	2	2	1	Nebulette	NEBL	sp|O76041|NEBL_HUMAN Nebulette OS=Homo sapiens OX=9606 GN=NEBL PE=1 SV=1	1	2	2	1	2	2	2	2	2	2	2	2	2	2	2	2	1	1	1	1	1	1	1.8	1.8	1.1	116.45	1014	1014	0	5.1149	By MS/MS	By MS/MS	By MS/MS	By MS/MS	By MS/MS	By MS/MS	1.8	1.8	1.8	1.8	1.8	1.8
O76054	O76054	9	9	9	SEC14-like protein 2	SEC14L2	sp|O76054|S14L2_HUMAN SEC14-like protein 2 OS=Homo sapiens OX=9606 GN=SEC14L2 PE=1 SV=1	1	9	9	9	7	8	7	8	7	7	7	8	7	8	7	7	7	8	7	8	7	7	30	30	30	46.145	403	403	0	13.101	By MS/MS	By MS/MS	By MS/MS	By MS/MS	By MS/MS	By MS/MS	25.8	27.8	24.8	27	24.3	21.3
O76070;Q16143	O76070	8;1	8;1	8;1	Gamma-synuclein	SNCG	sp|O76070|SYUG_HUMAN Gamma-synuclein OS=Homo sapiens OX=9606 GN=SNCG PE=1 SV=2	2	8	8	8	7	7	7	8	7	7	7	7	7	8	7	7	7	7	7	8	7	7	77.2	77.2	77.2	13.331	127	127;134	0	256.79	By MS/MS	By MS/MS	By MS/MS	By MS/MS	By MS/MS	By MS/MS	70.1	70.1	70.1	77.2	70.1	70.1
O76071	O76071	2	2	2	Probable cytosolic iron-sulfur protein assembly protein CIAO1	CIAO1	sp|O76071|CIAO1_HUMAN Probable cytosolic iron-sulfur protein assembly protein CIAO1 OS=Homo sapiens OX=9606 GN=CIAO1 PE=1 SV=1	1	2	2	2	2	1	1	1	2	1	2	1	1	1	2	1	2	1	1	1	2	1	8.3	8.3	8.3	37.84	339	339	0	8.8723	By MS/MS	By MS/MS	By matching	By matching	By MS/MS	By MS/MS	8.3	5.6	5.6	5.6	8.3	5.6
O76082	O76082	1	1	1	Solute carrier family 22 member 5	SLC22A5	sp|O76082|OCTN2_HUMAN Organic cation/carnitine transporter 2 OS=Homo sapiens OX=9606 GN=SLC22A5 PE=1 SV=1	1	1	1	1	1	1	1	1	1	1	1	1	1	1	1	1	1	1	1	1	1	1	1.8	1.8	1.8	62.751	557	557	0.0011394	2.5215	By MS/MS	By MS/MS	By MS/MS	By MS/MS	By MS/MS	By MS/MS	1.8	1.8	1.8	1.8	1.8	1.8
O76083	O76083	4	4	4	High affinity cGMP-specific 3,5-cyclic phosphodiesterase 9A	PDE9A	sp|O76083|PDE9A_HUMAN High affinity cGMP-specific 3,5-cyclic phosphodiesterase 9A OS=Homo sapiens OX=9606 GN=PDE9A PE=1 SV=1	1	4	4	4	3	3	3	4	3	3	3	3	3	4	3	3	3	3	3	4	3	3	8.3	8.3	8.3	68.492	593	593	0	23.121	By MS/MS	By MS/MS	By MS/MS	By MS/MS	By MS/MS	By MS/MS	6.2	6.2	6.2	8.3	6.2	6.2
O76094	O76094	1	1	1	Signal recognition particle subunit SRP72	SRP72	sp|O76094|SRP72_HUMAN Signal recognition particle subunit SRP72 OS=Homo sapiens OX=9606 GN=SRP72 PE=1 SV=3	1	1	1	1	0	1	1	1	1	0	0	1	1	1	1	0	0	1	1	1	1	0	1.6	1.6	1.6	74.605	671	671	0.0018505	2.2351		By MS/MS	By MS/MS	By matching	By MS/MS		0	1.6	1.6	1.6	1.6	0
O94760	O94760	17	17	16	N(G),N(G)-dimethylarginine dimethylaminohydrolase 1	DDAH1	sp|O94760|DDAH1_HUMAN N(G),N(G)-dimethylarginine dimethylaminohydrolase 1 OS=Homo sapiens OX=9606 GN=DDAH1 PE=1 SV=3	1	17	17	16	17	15	16	17	17	15	17	15	16	17	17	15	16	14	15	16	16	14	68.4	68.4	65.6	31.121	285	285	0	198.34	By MS/MS	By MS/MS	By MS/MS	By MS/MS	By MS/MS	By MS/MS	68.4	64.9	68.4	68.4	68.4	68.4
O94788	O94788	3	1	1	Retinal dehydrogenase 2	ALDH1A2	sp|O94788|AL1A2_HUMAN Retinal dehydrogenase 2 OS=Homo sapiens OX=9606 GN=ALDH1A2 PE=1 SV=3	1	3	1	1	3	3	2	3	3	3	1	1	1	1	1	1	1	1	1	1	1	1	6.4	2.7	2.7	56.723	518	518	0.0094563	1.4288	By MS/MS	By matching	By MS/MS	By MS/MS	By MS/MS	By MS/MS	6.4	6.4	4.2	6.4	6.4	6.4
O94804	O94804	18	16	16	Serine/threonine-protein kinase 10	STK10	sp|O94804|STK10_HUMAN Serine/threonine-protein kinase 10 OS=Homo sapiens OX=9606 GN=STK10 PE=1 SV=1	1	18	16	16	15	15	15	14	16	15	13	13	13	12	14	13	13	13	13	12	14	13	21.7	19.6	19.6	112.13	968	968	0	98.868	By MS/MS	By MS/MS	By MS/MS	By MS/MS	By MS/MS	By MS/MS	17.9	17.8	17.7	16.8	18.9	17.6
O94832;B0I1T2	O94832	42;2	42;2	42;2	Unconventional myosin-Id	MYO1D	sp|O94832|MYO1D_HUMAN Unconventional myosin-Id OS=Homo sapiens OX=9606 GN=MYO1D PE=1 SV=2	2	42	42	42	36	36	39	39	39	38	36	36	39	39	39	38	36	36	39	39	39	38	43.5	43.5	43.5	116.2	1006	1006;1018	0	323.31	By MS/MS	By MS/MS	By MS/MS	By MS/MS	By MS/MS	By MS/MS	38.4	38.5	41.6	40.4	40.7	39.1
O94856	O94856	14	14	14	Neurofascin	NFASC	sp|O94856|NFASC_HUMAN Neurofascin OS=Homo sapiens OX=9606 GN=NFASC PE=1 SV=4	1	14	14	14	8	8	10	13	13	14	8	8	10	13	13	14	8	8	10	13	13	14	12.5	12.5	12.5	150.02	1347	1347	0	105.11	By MS/MS	By MS/MS	By MS/MS	By MS/MS	By MS/MS	By MS/MS	7.3	7.7	9.4	11.8	12	12.5
O94886	O94886	7	7	7	CSC1-like protein 1	TMEM63A	sp|O94886|CSCL1_HUMAN CSC1-like protein 1 OS=Homo sapiens OX=9606 GN=TMEM63A PE=1 SV=3	1	7	7	7	7	7	7	5	5	6	7	7	7	5	5	6	7	7	7	5	5	6	9.8	9.8	9.8	92.125	807	807	0	18.921	By MS/MS	By MS/MS	By MS/MS	By MS/MS	By MS/MS	By MS/MS	9.8	9.8	9.8	6.7	6.8	7.7
O94903	O94903	6	6	6	Proline synthase co-transcribed bacterial homolog protein	PROSC	sp|O94903|PLPHP_HUMAN Pyridoxal phosphate homeostasis protein OS=Homo sapiens OX=9606 GN=PLPBP PE=1 SV=1	1	6	6	6	4	4	6	6	4	5	4	4	6	6	4	5	4	4	6	6	4	5	25.1	25.1	25.1	30.344	275	275	0	14.615	By MS/MS	By MS/MS	By MS/MS	By MS/MS	By MS/MS	By MS/MS	17.8	13.8	25.1	25.1	13.8	20.4
O94955	O94955	3	3	3	Rho-related BTB domain-containing protein 3	RHOBTB3	sp|O94955|RHBT3_HUMAN Rho-related BTB domain-containing protein 3 OS=Homo sapiens OX=9606 GN=RHOBTB3 PE=1 SV=2	1	3	3	3	2	2	2	3	2	2	2	2	2	3	2	2	2	2	2	3	2	2	4.7	4.7	4.7	69.413	611	611	0	4.9779	By MS/MS	By MS/MS	By MS/MS	By MS/MS	By MS/MS	By MS/MS	3.4	3.4	3.4	4.7	3.4	3.4
O94956	O94956	1	1	1	Solute carrier organic anion transporter family member 2B1	SLCO2B1	sp|O94956|SO2B1_HUMAN Solute carrier organic anion transporter family member 2B1 OS=Homo sapiens OX=9606 GN=SLCO2B1 PE=1 SV=2	1	1	1	1	1	1	1	1	1	1	1	1	1	1	1	1	1	1	1	1	1	1	2.3	2.3	2.3	76.71	709	709	0	14.928	By MS/MS	By matching	By MS/MS	By matching	By matching	By matching	2.3	2.3	2.3	2.3	2.3	2.3
O94973	O94973	15	15	10	AP-2 complex subunit alpha-2	AP2A2	sp|O94973|AP2A2_HUMAN AP-2 complex subunit alpha-2 OS=Homo sapiens OX=9606 GN=AP2A2 PE=1 SV=2	1	15	15	10	13	14	14	12	13	14	13	14	14	12	13	14	9	10	10	8	9	10	18	18	12.2	103.96	939	939	0	92.03	By MS/MS	By MS/MS	By MS/MS	By MS/MS	By MS/MS	By MS/MS	16.8	17.3	17.3	15.3	16.3	17.3
O94979	O94979	4	4	4	Protein transport protein Sec31A	SEC31A	sp|O94979|SC31A_HUMAN Protein transport protein Sec31A OS=Homo sapiens OX=9606 GN=SEC31A PE=1 SV=3	1	4	4	4	3	4	4	3	4	4	3	4	4	3	4	4	3	4	4	3	4	4	4.5	4.5	4.5	133.01	1220	1220	0	10.673	By MS/MS	By MS/MS	By MS/MS	By MS/MS	By MS/MS	By MS/MS	3.8	4.5	4.5	3.8	4.5	4.5
O95025;Q13275	O95025;Q13275	2;1	2;1	2;1	Semaphorin-3D;Semaphorin-3F	SEMA3D;SEMA3F	sp|O95025|SEM3D_HUMAN Semaphorin-3D OS=Homo sapiens OX=9606 GN=SEMA3D PE=2 SV=2;sp|Q13275|SEM3F_HUMAN Semaphorin-3F OS=Homo sapiens OX=9606 GN=SEMA3F PE=2 SV=2	2	2	2	2	2	1	1	1	1	0	2	1	1	1	1	0	2	1	1	1	1	0	3.3	3.3	3.3	89.65	777	777;785	0.0011372	2.4984	By MS/MS	By matching	By MS/MS	By matching	By matching		3.3	1.7	1.7	1.7	1.7	0
O95084	O95084	1	1	1	Serine protease 23	PRSS23	sp|O95084|PRS23_HUMAN Serine protease 23 OS=Homo sapiens OX=9606 GN=PRSS23 PE=1 SV=1	1	1	1	1	1	1	1	1	1	1	1	1	1	1	1	1	1	1	1	1	1	1	3.4	3.4	3.4	43.001	383	383	0	4.9394	By MS/MS	By MS/MS	By MS/MS	By MS/MS	By MS/MS	By MS/MS	3.4	3.4	3.4	3.4	3.4	3.4
O95154	O95154	5	4	2	Aflatoxin B1 aldehyde reductase member 3	AKR7A3	sp|O95154|ARK73_HUMAN Aflatoxin B1 aldehyde reductase member 3 OS=Homo sapiens OX=9606 GN=AKR7A3 PE=1 SV=2	1	5	4	2	4	4	3	3	4	4	3	3	2	2	3	3	2	2	1	1	2	1	14.5	11.2	4.5	37.206	331	331	0	7.4517	By MS/MS	By MS/MS	By MS/MS	By MS/MS	By MS/MS	By MS/MS	11.5	11.5	9.4	9.4	11.5	12.1
O95163	O95163	1	1	1	Elongator complex protein 1	IKBKAP	sp|O95163|ELP1_HUMAN Elongator complex protein 1 OS=Homo sapiens OX=9606 GN=ELP1 PE=1 SV=3	1	1	1	1	1	1	1	0	0	0	1	1	1	0	0	0	1	1	1	0	0	0	1.7	1.7	1.7	150.25	1332	1332	0.0011278	2.4056	By matching	By matching	By MS/MS				1.7	1.7	1.7	0	0	0
O95164	O95164	5	5	5	Ubiquitin-like protein 3	UBL3	sp|O95164|UBL3_HUMAN Ubiquitin-like protein 3 OS=Homo sapiens OX=9606 GN=UBL3 PE=1 SV=1	1	5	5	5	5	4	4	5	5	4	5	4	4	5	5	4	5	4	4	5	5	4	51.3	51.3	51.3	13.157	117	117	0	13.132	By MS/MS	By MS/MS	By MS/MS	By MS/MS	By MS/MS	By MS/MS	51.3	38.5	38.5	51.3	51.3	38.5
O95183	O95183	3	3	3	Vesicle-associated membrane protein 5	VAMP5	sp|O95183|VAMP5_HUMAN Vesicle-associated membrane protein 5 OS=Homo sapiens OX=9606 GN=VAMP5 PE=1 SV=1	1	3	3	3	3	3	2	3	3	3	3	3	2	3	3	3	3	3	2	3	3	3	28.4	28.4	28.4	12.805	116	116	0	21.156	By MS/MS	By MS/MS	By MS/MS	By MS/MS	By MS/MS	By MS/MS	28.4	28.4	22.4	28.4	28.4	28.4
O95214	O95214	1	1	1	Leptin receptor overlapping transcript-like 1	LEPROTL1	sp|O95214|LERL1_HUMAN Leptin receptor overlapping transcript-like 1 OS=Homo sapiens OX=9606 GN=LEPROTL1 PE=1 SV=2	1	1	1	1	1	1	1	1	1	0	1	1	1	1	1	0	1	1	1	1	1	0	9.9	9.9	9.9	14.428	131	131	0	7.5705	By matching	By matching	By MS/MS	By matching	By MS/MS		9.9	9.9	9.9	9.9	9.9	0
O95219	O95219	3	3	3	Sorting nexin-4	SNX4	sp|O95219|SNX4_HUMAN Sorting nexin-4 OS=Homo sapiens OX=9606 GN=SNX4 PE=1 SV=1	1	3	3	3	1	0	3	2	2	1	1	0	3	2	2	1	1	0	3	2	2	1	10.4	10.4	10.4	51.908	450	450	0	6.0166	By MS/MS		By MS/MS	By matching	By MS/MS	By MS/MS	2.2	0	10.4	8.2	8.2	2.2
O95263	O95263	8	7	7	High affinity cAMP-specific and IBMX-insensitive 3,5-cyclic phosphodiesterase 8B	PDE8B	sp|O95263|PDE8B_HUMAN High affinity cAMP-specific and IBMX-insensitive 3,5-cyclic phosphodiesterase 8B OS=Homo sapiens OX=9606 GN=PDE8B PE=1 SV=2	1	8	7	7	7	6	7	7	6	4	6	5	6	6	5	4	6	5	6	6	5	4	11.2	9.8	9.8	98.978	885	885	0	48.072	By MS/MS	By MS/MS	By MS/MS	By MS/MS	By MS/MS	By MS/MS	9.6	8.2	9.6	9.8	7.8	5.1
O95279	O95279	2	2	2	Potassium channel subfamily K member 5	KCNK5	sp|O95279|KCNK5_HUMAN Potassium channel subfamily K member 5 OS=Homo sapiens OX=9606 GN=KCNK5 PE=1 SV=1	1	2	2	2	1	2	1	0	1	0	1	2	1	0	1	0	1	2	1	0	1	0	3.8	3.8	3.8	55.129	499	499	0.00086022	4.1594	By MS/MS	By MS/MS	By MS/MS		By MS/MS		2.4	3.8	2.4	0	2.4	0
O95294	O95294	10	10	10	RasGAP-activating-like protein 1	RASAL1	sp|O95294|RASL1_HUMAN RasGAP-activating-like protein 1 OS=Homo sapiens OX=9606 GN=RASAL1 PE=1 SV=3	1	10	10	10	9	9	10	10	8	8	9	9	10	10	8	8	9	9	10	10	8	8	17.5	17.5	17.5	90.015	804	804	0	64.393	By MS/MS	By MS/MS	By MS/MS	By MS/MS	By MS/MS	By MS/MS	16.5	16.5	17.5	17.5	13.4	13.6
O95297	O95297	1	1	1	Myelin protein zero-like protein 1	MPZL1	sp|O95297|MPZL1_HUMAN Myelin protein zero-like protein 1 OS=Homo sapiens OX=9606 GN=MPZL1 PE=1 SV=1	1	1	1	1	1	1	1	1	1	1	1	1	1	1	1	1	1	1	1	1	1	1	3.7	3.7	3.7	29.082	269	269	0.0075214	1.5059	By MS/MS	By MS/MS	By MS/MS	By MS/MS	By MS/MS	By matching	3.7	3.7	3.7	3.7	3.7	3.7
O95336	O95336	7	7	7	6-phosphogluconolactonase	PGLS	sp|O95336|6PGL_HUMAN 6-phosphogluconolactonase OS=Homo sapiens OX=9606 GN=PGLS PE=1 SV=2	1	7	7	7	6	7	6	6	7	6	6	7	6	6	7	6	6	7	6	6	7	6	35.3	35.3	35.3	27.547	258	258	0	14.439	By MS/MS	By MS/MS	By MS/MS	By MS/MS	By MS/MS	By MS/MS	29.5	35.3	29.5	29.5	35.3	29.5
O95340	O95340	2	2	2	Bifunctional 3-phosphoadenosine 5-phosphosulfate synthase 2;Sulfate adenylyltransferase;Adenylyl-sulfate kinase	PAPSS2	sp|O95340|PAPS2_HUMAN Bifunctional 3-phosphoadenosine 5-phosphosulfate synthase 2 OS=Homo sapiens OX=9606 GN=PAPSS2 PE=1 SV=2	1	2	2	2	2	2	2	1	2	2	2	2	2	1	2	2	2	2	2	1	2	2	2.9	2.9	2.9	69.5	614	614	0.0032432	2.0251	By MS/MS	By MS/MS	By MS/MS	By matching	By MS/MS	By MS/MS	2.9	2.9	2.9	1.1	2.9	2.9
O95342	O95342	2	1	1	Bile salt export pump	ABCB11	sp|O95342|ABCBB_HUMAN Bile salt export pump OS=Homo sapiens OX=9606 GN=ABCB11 PE=1 SV=2	1	2	1	1	2	2	2	2	2	2	1	1	1	1	1	1	1	1	1	1	1	1	1.9	1.3	1.3	146.41	1321	1321	0	19.953	By MS/MS	By matching	By MS/MS	By MS/MS	By MS/MS	By MS/MS	1.9	1.9	1.9	1.9	1.9	1.9
O95352	O95352	1	1	1	Ubiquitin-like modifier-activating enzyme ATG7	ATG7	sp|O95352|ATG7_HUMAN Ubiquitin-like modifier-activating enzyme ATG7 OS=Homo sapiens OX=9606 GN=ATG7 PE=1 SV=1	1	1	1	1	1	0	1	1	1	1	1	0	1	1	1	1	1	0	1	1	1	1	1.6	1.6	1.6	77.959	703	703	0.0097775	1.4206	By MS/MS		By matching	By matching	By MS/MS	By matching	1.6	0	1.6	1.6	1.6	1.6
O95359;O75410	O95359	9;1	9;1	9;1	Transforming acidic coiled-coil-containing protein 2	TACC2	sp|O95359|TACC2_HUMAN Transforming acidic coiled-coil-containing protein 2 OS=Homo sapiens OX=9606 GN=TACC2 PE=1 SV=3	2	9	9	9	7	4	8	5	5	7	7	4	8	5	5	7	7	4	8	5	5	7	3.8	3.8	3.8	309.42	2948	2948;805	0	30.195	By MS/MS	By MS/MS	By MS/MS	By MS/MS	By MS/MS	By MS/MS	2.7	1.7	3.4	2	2	2.9
O95372	O95372	6	6	6	Acyl-protein thioesterase 2	LYPLA2	sp|O95372|LYPA2_HUMAN Acyl-protein thioesterase 2 OS=Homo sapiens OX=9606 GN=LYPLA2 PE=1 SV=1	1	6	6	6	5	5	5	5	4	6	5	5	5	5	4	6	5	5	5	5	4	6	29.4	29.4	29.4	24.737	231	231	0	54.463	By MS/MS	By MS/MS	By MS/MS	By MS/MS	By MS/MS	By MS/MS	26	26	26	26	22.5	29.4
O95379	O95379	4	4	4	Tumor necrosis factor alpha-induced protein 8	TNFAIP8	sp|O95379|TFIP8_HUMAN Tumor necrosis factor alpha-induced protein 8 OS=Homo sapiens OX=9606 GN=TNFAIP8 PE=1 SV=1	1	4	4	4	2	2	3	2	1	3	2	2	3	2	1	3	2	2	3	2	1	3	17.2	17.2	17.2	23.003	198	198	0	5.8079	By MS/MS	By matching	By MS/MS	By MS/MS	By MS/MS	By MS/MS	8.6	8.1	13.1	7.6	4.5	12.1
O95394	O95394	12	12	12	Phosphoacetylglucosamine mutase	PGM3	sp|O95394|AGM1_HUMAN Phosphoacetylglucosamine mutase OS=Homo sapiens OX=9606 GN=PGM3 PE=1 SV=1	1	12	12	12	8	9	9	7	9	9	8	9	9	7	9	9	8	9	9	7	9	9	24	24	24	59.851	542	542	0	67.501	By MS/MS	By MS/MS	By MS/MS	By MS/MS	By MS/MS	By MS/MS	16.1	17.3	19.7	14.6	17.3	17.7
O95398;Q8WZA2	O95398	17;1	17;1	17;1	Rap guanine nucleotide exchange factor 3	RAPGEF3	sp|O95398|RPGF3_HUMAN Rap guanine nucleotide exchange factor 3 OS=Homo sapiens OX=9606 GN=RAPGEF3 PE=1 SV=6	2	17	17	17	16	13	13	11	13	13	16	13	13	11	13	13	16	13	13	11	13	13	24.7	24.7	24.7	103.75	923	923;1011	0	87.518	By MS/MS	By MS/MS	By MS/MS	By MS/MS	By MS/MS	By MS/MS	23.3	16.9	18.4	16.5	19.2	19.1
O95433	O95433	4	4	4	Activator of 90 kDa heat shock protein ATPase homolog 1	AHSA1	sp|O95433|AHSA1_HUMAN Activator of 90 kDa heat shock protein ATPase homolog 1 OS=Homo sapiens OX=9606 GN=AHSA1 PE=1 SV=1	1	4	4	4	1	3	4	2	2	3	1	3	4	2	2	3	1	3	4	2	2	3	15.1	15.1	15.1	38.274	338	338	0	8.2494	By MS/MS	By MS/MS	By MS/MS	By MS/MS	By MS/MS	By MS/MS	5.6	11.5	15.1	9.2	9.2	11.8
O95436	O95436	5	5	5	Sodium-dependent phosphate transport protein 2B	SLC34A2	sp|O95436|NPT2B_HUMAN Sodium-dependent phosphate transport protein 2B OS=Homo sapiens OX=9606 GN=SLC34A2 PE=1 SV=3	1	5	5	5	4	3	4	3	5	4	4	3	4	3	5	4	4	3	4	3	5	4	8	8	8	75.759	690	690	0	16.938	By MS/MS	By MS/MS	By MS/MS	By MS/MS	By MS/MS	By MS/MS	6.5	5.5	6.5	5.5	8	6.5
O95471	O95471	1	1	1	Claudin-7	CLDN7	sp|O95471|CLD7_HUMAN Claudin-7 OS=Homo sapiens OX=9606 GN=CLDN7 PE=1 SV=4	1	1	1	1	1	1	1	1	0	1	1	1	1	1	0	1	1	1	1	1	0	1	8.1	8.1	8.1	22.418	211	211	0	4.9486	By matching	By MS/MS	By matching	By MS/MS		By matching	8.1	8.1	8.1	8.1	0	8.1
O95497	O95497	5	5	5	Pantetheinase	VNN1	sp|O95497|VNN1_HUMAN Pantetheinase OS=Homo sapiens OX=9606 GN=VNN1 PE=1 SV=2	1	5	5	5	4	4	4	5	3	5	4	4	4	5	3	5	4	4	4	5	3	5	11.9	11.9	11.9	57.011	513	513	0	35.842	By MS/MS	By MS/MS	By MS/MS	By MS/MS	By MS/MS	By MS/MS	9.2	9.2	9.2	11.9	6.2	11.9
O95498	O95498	5	5	5	Vascular non-inflammatory molecule 2	VNN2	sp|O95498|VNN2_HUMAN Pantetheine hydrolase VNN2 OS=Homo sapiens OX=9606 GN=VNN2 PE=1 SV=3	1	5	5	5	5	5	5	1	2	1	5	5	5	1	2	1	5	5	5	1	2	1	11.3	11.3	11.3	58.502	520	520	0	11.319	By MS/MS	By MS/MS	By MS/MS	By MS/MS	By MS/MS	By MS/MS	11.3	11.3	11.3	2.5	5	2.5
O95562	O95562	1	1	1	Vesicle transport protein SFT2B	SFT2D2	sp|O95562|SFT2B_HUMAN Vesicle transport protein SFT2B OS=Homo sapiens OX=9606 GN=SFT2D2 PE=1 SV=1	1	1	1	1	1	1	1	1	1	1	1	1	1	1	1	1	1	1	1	1	1	1	6.2	6.2	6.2	17.779	160	160	0.00086207	4.1841	By MS/MS	By MS/MS	By matching	By MS/MS	By MS/MS	By MS/MS	6.2	6.2	6.2	6.2	6.2	6.2
O95630	O95630	17	17	17	STAM-binding protein	STAMBP	sp|O95630|STABP_HUMAN STAM-binding protein OS=Homo sapiens OX=9606 GN=STAMBP PE=1 SV=1	1	17	17	17	17	16	17	16	17	16	17	16	17	16	17	16	17	16	17	16	17	16	41.5	41.5	41.5	48.076	424	424	0	129.73	By MS/MS	By MS/MS	By MS/MS	By MS/MS	By MS/MS	By MS/MS	41.5	41.5	41.5	39.9	41.5	41
O95671	O95671	4	4	4	N-acetylserotonin O-methyltransferase-like protein	ASMTL	sp|O95671|ASML_HUMAN Probable bifunctional dTTP/UTP pyrophosphatase/methyltransferase protein OS=Homo sapiens OX=9606 GN=ASMTL PE=1 SV=3	1	4	4	4	3	3	3	1	3	3	3	3	3	1	3	3	3	3	3	1	3	3	8.1	8.1	8.1	68.856	621	621	0	7.6491	By MS/MS	By MS/MS	By MS/MS	By MS/MS	By MS/MS	By MS/MS	5.5	5.5	6.8	1.3	5.5	6.6
O95716;Q96E17	O95716	9;1	7;0	6;0	Ras-related protein Rab-3D	RAB3D	sp|O95716|RAB3D_HUMAN Ras-related protein Rab-3D OS=Homo sapiens OX=9606 GN=RAB3D PE=1 SV=1	2	9	7	6	9	9	9	9	9	9	7	7	7	7	7	7	6	6	6	6	6	6	30.1	26.5	22.8	24.267	219	219;227	0	46.446	By MS/MS	By MS/MS	By MS/MS	By MS/MS	By MS/MS	By MS/MS	30.1	30.1	30.1	30.1	30.1	30.1
O95721	O95721	4	4	4	Synaptosomal-associated protein 29	SNAP29	sp|O95721|SNP29_HUMAN Synaptosomal-associated protein 29 OS=Homo sapiens OX=9606 GN=SNAP29 PE=1 SV=1	1	4	4	4	3	2	3	2	2	3	3	2	3	2	2	3	3	2	3	2	2	3	20.5	20.5	20.5	28.97	258	258	0	14.905	By MS/MS	By MS/MS	By MS/MS	By MS/MS	By MS/MS	By MS/MS	17.1	11.6	14	11.6	11.6	17.1
O95741	O95741	2	1	1	Copine-6	CPNE6	sp|O95741|CPNE6_HUMAN Copine-6 OS=Homo sapiens OX=9606 GN=CPNE6 PE=1 SV=3	1	2	1	1	2	2	2	2	2	2	1	1	1	1	1	1	1	1	1	1	1	1	3.9	2.3	2.3	61.99	557	557	0	4.9253	By MS/MS	By matching	By MS/MS	By MS/MS	By MS/MS	By MS/MS	3.9	3.9	3.9	3.9	3.9	3.9
O95747	O95747	10	10	9	Serine/threonine-protein kinase OSR1	OXSR1	sp|O95747|OXSR1_HUMAN Serine/threonine-protein kinase OSR1 OS=Homo sapiens OX=9606 GN=OXSR1 PE=1 SV=1	1	10	10	9	9	10	10	9	10	10	9	10	10	9	10	10	8	9	9	8	9	9	22	22	20.5	58.022	527	527	0	36.368	By MS/MS	By MS/MS	By MS/MS	By MS/MS	By MS/MS	By MS/MS	19.9	22	22	19.9	22	22
O95755	O95755	1	1	1	Ras-related protein Rab-36	RAB36	sp|O95755|RAB36_HUMAN Ras-related protein Rab-36 OS=Homo sapiens OX=9606 GN=RAB36 PE=1 SV=2	1	1	1	1	0	1	1	0	1	1	0	1	1	0	1	1	0	1	1	0	1	1	6	6	6	36.322	333	333	0	22.53		By matching	By MS/MS		By MS/MS	By matching	0	6	6	0	6	6
O95757	O95757	11	7	7	Heat shock 70 kDa protein 4L	HSPA4L	sp|O95757|HS74L_HUMAN Heat shock 70 kDa protein 4L OS=Homo sapiens OX=9606 GN=HSPA4L PE=1 SV=3	1	11	7	7	6	7	5	4	6	9	4	4	3	2	3	5	4	4	3	2	3	5	16.7	10.6	10.6	94.511	839	839	0	11.98	By MS/MS	By MS/MS	By MS/MS	By MS/MS	By MS/MS	By MS/MS	8.1	11	7	6.2	9.2	14.3
O95772	O95772	7	7	7	MLN64 N-terminal domain homolog	STARD3NL	sp|O95772|STR3N_HUMAN STARD3 N-terminal-like protein OS=Homo sapiens OX=9606 GN=STARD3NL PE=1 SV=1	1	7	7	7	6	5	7	0	1	0	6	5	7	0	1	0	6	5	7	0	1	0	31.6	31.6	31.6	26.654	234	234	0	19.686	By MS/MS	By MS/MS	By MS/MS		By MS/MS		26.1	21.8	31.6	0	4.3	0
O95782	O95782	13	8	8	AP-2 complex subunit alpha-1	AP2A1	sp|O95782|AP2A1_HUMAN AP-2 complex subunit alpha-1 OS=Homo sapiens OX=9606 GN=AP2A1 PE=1 SV=3	1	13	8	8	11	11	11	12	11	10	7	7	7	8	7	6	7	7	7	8	7	6	16.5	11	11	107.54	977	977	0	42.608	By MS/MS	By MS/MS	By MS/MS	By MS/MS	By MS/MS	By MS/MS	13.7	14.6	14	15.8	14	12.8
O95817	O95817	4	4	4	BAG family molecular chaperone regulator 3	BAG3	sp|O95817|BAG3_HUMAN BAG family molecular chaperone regulator 3 OS=Homo sapiens OX=9606 GN=BAG3 PE=1 SV=3	1	4	4	4	2	2	2	1	2	0	2	2	2	1	2	0	2	2	2	1	2	0	7.7	7.7	7.7	61.594	575	575	0	9.84	By MS/MS	By MS/MS	By MS/MS	By matching	By MS/MS		4.2	3.7	4.2	2.4	4.7	0
O95825	O95825	4	4	4	Quinone oxidoreductase-like protein 1	CRYZL1	sp|O95825|QORL1_HUMAN Quinone oxidoreductase-like protein 1 OS=Homo sapiens OX=9606 GN=CRYZL1 PE=1 SV=2	1	4	4	4	2	1	1	4	3	3	2	1	1	4	3	3	2	1	1	4	3	3	12.9	12.9	12.9	38.696	349	349	0	5.8737	By MS/MS	By MS/MS	By MS/MS	By MS/MS	By MS/MS	By MS/MS	6.3	4	4	12.9	9.5	10.6
O95833	O95833	4	4	4	Chloride intracellular channel protein 3	CLIC3	sp|O95833|CLIC3_HUMAN Chloride intracellular channel protein 3 OS=Homo sapiens OX=9606 GN=CLIC3 PE=1 SV=2	1	4	4	4	4	3	3	4	4	4	4	3	3	4	4	4	4	3	3	4	4	4	21.2	21.2	21.2	26.648	236	236	0	36.713	By MS/MS	By MS/MS	By MS/MS	By MS/MS	By MS/MS	By MS/MS	21.2	14.4	14.4	21.2	21.2	21.2
O95834	O95834	9	9	9	Echinoderm microtubule-associated protein-like 2	EML2	sp|O95834|EMAL2_HUMAN Echinoderm microtubule-associated protein-like 2 OS=Homo sapiens OX=9606 GN=EML2 PE=1 SV=1	1	9	9	9	9	9	9	8	9	9	9	9	9	8	9	9	9	9	9	8	9	9	19.1	19.1	19.1	70.678	649	649	0	57.397	By MS/MS	By MS/MS	By MS/MS	By MS/MS	By MS/MS	By MS/MS	19.1	19.1	19.1	15.4	19.1	19.1
O95837;Q03113	O95837	12;1	8;0	8;0	Guanine nucleotide-binding protein subunit alpha-14	GNA14	sp|O95837|GNA14_HUMAN Guanine nucleotide-binding protein subunit alpha-14 OS=Homo sapiens OX=9606 GN=GNA14 PE=1 SV=1	2	12	8	8	6	8	6	11	11	9	2	4	2	7	7	5	2	4	2	7	7	5	35.2	27	27	41.57	355	355;381	0	16.479	By MS/MS	By MS/MS	By MS/MS	By MS/MS	By MS/MS	By MS/MS	16.1	24.2	14.4	32.7	32.7	25.1
O95861	O95861	8	8	8	3(2),5-bisphosphate nucleotidase 1	BPNT1	sp|O95861|BPNT1_HUMAN 3(2),5-bisphosphate nucleotidase 1 OS=Homo sapiens OX=9606 GN=BPNT1 PE=1 SV=1	1	8	8	8	7	6	7	7	8	6	7	6	7	7	8	6	7	6	7	7	8	6	36	36	36	33.392	308	308	0	37.183	By MS/MS	By MS/MS	By MS/MS	By MS/MS	By MS/MS	By MS/MS	28.6	26	28.6	30.5	36	23.1
O95865	O95865	9	8	8	N(G),N(G)-dimethylarginine dimethylaminohydrolase 2	DDAH2	sp|O95865|DDAH2_HUMAN N(G),N(G)-dimethylarginine dimethylaminohydrolase 2 OS=Homo sapiens OX=9606 GN=DDAH2 PE=1 SV=1	1	9	8	8	8	8	7	8	8	8	7	7	6	7	7	7	7	7	6	7	7	7	41.1	38.2	38.2	29.644	285	285	0	100.32	By MS/MS	By MS/MS	By MS/MS	By MS/MS	By MS/MS	By MS/MS	38.6	36.8	35.8	38.6	38.6	38.6
O95954	O95954	9	9	9	Formimidoyltransferase-cyclodeaminase;Glutamate formimidoyltransferase;Formimidoyltetrahydrofolate cyclodeaminase	FTCD	sp|O95954|FTCD_HUMAN Formimidoyltransferase-cyclodeaminase OS=Homo sapiens OX=9606 GN=FTCD PE=1 SV=2	1	9	9	9	9	9	9	9	7	8	9	9	9	9	7	8	9	9	9	9	7	8	21.1	21.1	21.1	58.926	541	541	0	112.06	By MS/MS	By MS/MS	By MS/MS	By MS/MS	By MS/MS	By MS/MS	21.1	21.1	21.1	21.1	15.9	19
O95967	O95967	3	3	3	EGF-containing fibulin-like extracellular matrix protein 2	EFEMP2	sp|O95967|FBLN4_HUMAN EGF-containing fibulin-like extracellular matrix protein 2 OS=Homo sapiens OX=9606 GN=EFEMP2 PE=1 SV=3	1	3	3	3	0	0	0	3	3	2	0	0	0	3	3	2	0	0	0	3	3	2	7.4	7.4	7.4	49.405	443	443	0	5.2464				By MS/MS	By MS/MS	By MS/MS	0	0	0	7.4	7.4	5.4
O95980	O95980	2	2	2	Reversion-inducing cysteine-rich protein with Kazal motifs	RECK	sp|O95980|RECK_HUMAN Reversion-inducing cysteine-rich protein with Kazal motifs OS=Homo sapiens OX=9606 GN=RECK PE=1 SV=1	1	2	2	2	2	1	2	1	1	1	2	1	2	1	1	1	2	1	2	1	1	1	2.2	2.2	2.2	106.46	971	971	0.00080418	3.2583	By MS/MS	By MS/MS	By MS/MS	By MS/MS	By MS/MS	By MS/MS	2.2	1	2.2	1.1	1.1	1.1
O95989	O95989	2	2	2	Diphosphoinositol polyphosphate phosphohydrolase 1	NUDT3	sp|O95989|NUDT3_HUMAN Diphosphoinositol polyphosphate phosphohydrolase 1 OS=Homo sapiens OX=9606 GN=NUDT3 PE=1 SV=1	1	2	2	2	2	1	2	2	2	2	2	1	2	2	2	2	2	1	2	2	2	2	11.6	11.6	11.6	19.471	172	172	0.00079334	3.0661	By MS/MS	By MS/MS	By MS/MS	By MS/MS	By MS/MS	By MS/MS	11.6	5.2	11.6	11.6	11.6	11.6
O96008	O96008	2	2	2	Mitochondrial import receptor subunit TOM40 homolog	TOMM40	sp|O96008|TOM40_HUMAN Mitochondrial import receptor subunit TOM40 homolog OS=Homo sapiens OX=9606 GN=TOMM40 PE=1 SV=1	1	2	2	2	2	2	2	1	2	2	2	2	2	1	2	2	2	2	2	1	2	2	8.6	8.6	8.6	37.893	361	361	0	38.694	By MS/MS	By MS/MS	By MS/MS	By matching	By MS/MS	By MS/MS	8.6	8.6	8.6	4.2	8.6	8.6
O96009	O96009	7	7	7	Napsin-A	NAPSA	sp|O96009|NAPSA_HUMAN Napsin-A OS=Homo sapiens OX=9606 GN=NAPSA PE=1 SV=1	1	7	7	7	7	7	7	6	6	6	7	7	7	6	6	6	7	7	7	6	6	6	15.7	15.7	15.7	45.386	420	420	0	77.807	By MS/MS	By MS/MS	By MS/MS	By MS/MS	By MS/MS	By MS/MS	15.7	15.7	15.7	13.3	13.3	13.3
O96011	O96011	5	5	5	Peroxisomal membrane protein 11B	PEX11B	sp|O96011|PX11B_HUMAN Peroxisomal membrane protein 11B OS=Homo sapiens OX=9606 GN=PEX11B PE=1 SV=1	1	5	5	5	4	4	5	3	3	3	4	4	5	3	3	3	4	4	5	3	3	3	20.5	20.5	20.5	28.431	259	259	0	22.861	By MS/MS	By MS/MS	By MS/MS	By MS/MS	By MS/MS	By MS/MS	16.6	16.6	20.5	12.4	12.4	12
O96013;Q9P286	O96013	13;2	13;2	13;2	Serine/threonine-protein kinase PAK 4	PAK4	sp|O96013|PAK4_HUMAN Serine/threonine-protein kinase PAK 4 OS=Homo sapiens OX=9606 GN=PAK4 PE=1 SV=1	2	13	13	13	12	12	11	13	11	12	12	12	11	13	11	12	12	12	11	13	11	12	23.9	23.9	23.9	64.071	591	591;719	0	85.657	By MS/MS	By MS/MS	By MS/MS	By MS/MS	By MS/MS	By MS/MS	22.7	22.7	22.3	23.9	20.6	22.7
O96033	O96033	1	1	1	Molybdopterin synthase sulfur carrier subunit	MOCS2	sp|O96033|MOC2A_HUMAN Molybdopterin synthase sulfur carrier subunit OS=Homo sapiens OX=9606 GN=MOCS2 PE=1 SV=1	1	1	1	1	1	1	1	1	1	1	1	1	1	1	1	1	1	1	1	1	1	1	21.6	21.6	21.6	9.7552	88	88	0	6.703	By MS/MS	By MS/MS	By MS/MS	By MS/MS	By matching	By MS/MS	21.6	21.6	21.6	21.6	21.6	21.6
P00167	P00167	1	1	1	Cytochrome b5	CYB5A	sp|P00167|CYB5_HUMAN Cytochrome b5 OS=Homo sapiens OX=9606 GN=CYB5A PE=1 SV=2	1	1	1	1	1	1	0	1	0	0	1	1	0	1	0	0	1	1	0	1	0	0	6.7	6.7	6.7	15.33	134	134	0.0049313	1.8051	By MS/MS	By matching		By matching			6.7	6.7	0	6.7	0	0
P00326;P07327;P00325	P00326;P07327;P00325	13;9;9	13;9;9	13;9;9	Alcohol dehydrogenase 1C;Alcohol dehydrogenase 1A;Alcohol dehydrogenase 1B	ADH1C;ADH1A;ADH1B	sp|P00326|ADH1G_HUMAN Alcohol dehydrogenase 1C OS=Homo sapiens OX=9606 GN=ADH1C PE=1 SV=2;sp|P07327|ADH1A_HUMAN Alcohol dehydrogenase 1A OS=Homo sapiens OX=9606 GN=ADH1A PE=1 SV=2;sp|P00325|ADH1B_HUMAN All-trans-retinol dehydrogenase [NAD(+)] ADH1B OS=Homo	3	13	13	13	12	11	11	12	11	11	12	11	11	12	11	11	12	11	11	12	11	11	32.3	32.3	32.3	39.867	375	375;375;375	0	56.574	By MS/MS	By MS/MS	By MS/MS	By MS/MS	By MS/MS	By MS/MS	29.9	27.7	27.7	30.1	27.7	27.7
P00338;Q6ZMR3;P07864	P00338	13;1;1	11;0;0	11;0;0	L-lactate dehydrogenase A chain	LDHA	sp|P00338|LDHA_HUMAN L-lactate dehydrogenase A chain OS=Homo sapiens OX=9606 GN=LDHA PE=1 SV=2	3	13	11	11	13	13	13	12	13	13	11	11	11	11	11	11	11	11	11	11	11	11	36.1	30.4	30.4	36.688	332	332;332;332	0	38.67	By MS/MS	By MS/MS	By MS/MS	By MS/MS	By MS/MS	By MS/MS	36.1	36.1	36.1	34	36.1	36.1
P00352;P05091;P30837	P00352	22;3;1	22;3;1	21;2;0	Retinal dehydrogenase 1	ALDH1A1	sp|P00352|AL1A1_HUMAN Aldehyde dehydrogenase 1A1 OS=Homo sapiens OX=9606 GN=ALDH1A1 PE=1 SV=2	3	22	22	21	20	21	21	22	22	21	20	21	21	22	22	21	19	20	20	21	21	20	54.1	54.1	52.5	54.861	501	501;517;517	0	232.14	By MS/MS	By MS/MS	By MS/MS	By MS/MS	By MS/MS	By MS/MS	51.1	52.7	51.1	54.1	54.1	51.1
P00387	P00387	3	3	3	NADH-cytochrome b5 reductase 3;NADH-cytochrome b5 reductase 3 membrane-bound form;NADH-cytochrome b5 reductase 3 soluble form	CYB5R3	sp|P00387|NB5R3_HUMAN NADH-cytochrome b5 reductase 3 OS=Homo sapiens OX=9606 GN=CYB5R3 PE=1 SV=3	1	3	3	3	1	2	2	2	1	1	1	2	2	2	1	1	1	2	2	2	1	1	12.3	12.3	12.3	34.234	301	301	0.00082816	3.6583	By MS/MS	By MS/MS	By MS/MS	By MS/MS	By MS/MS	By MS/MS	4	8.3	8.3	8	4	4
P00390	P00390	15	15	15	Glutathione reductase, mitochondrial	GSR	sp|P00390|GSHR_HUMAN Glutathione reductase, mitochondrial OS=Homo sapiens OX=9606 GN=GSR PE=1 SV=2	1	15	15	15	12	13	12	13	13	14	12	13	12	13	13	14	12	13	12	13	13	14	39.8	39.8	39.8	56.256	522	522	0	105.09	By MS/MS	By MS/MS	By MS/MS	By MS/MS	By MS/MS	By MS/MS	37	38.5	37	38.3	38.3	33.3
P00439	P00439	5	5	5	Phenylalanine-4-hydroxylase	PAH	sp|P00439|PH4H_HUMAN Phenylalanine-4-hydroxylase OS=Homo sapiens OX=9606 GN=PAH PE=1 SV=1	1	5	5	5	3	4	4	4	2	4	3	4	4	4	2	4	3	4	4	4	2	4	9.7	9.7	9.7	51.861	452	452	0	6.0466	By MS/MS	By MS/MS	By MS/MS	By MS/MS	By MS/MS	By MS/MS	5.8	8.2	8.2	7.3	3.5	8.2
P00441	P00441	7	7	7	Superoxide dismutase [Cu-Zn]	SOD1	sp|P00441|SODC_HUMAN Superoxide dismutase [Cu-Zn] OS=Homo sapiens OX=9606 GN=SOD1 PE=1 SV=2	1	7	7	7	6	7	6	6	7	6	6	7	6	6	7	6	6	7	6	6	7	6	49.4	49.4	49.4	15.936	154	154	0	137.93	By MS/MS	By MS/MS	By MS/MS	By MS/MS	By MS/MS	By MS/MS	46.1	49.4	46.1	46.1	49.4	46.1
P00450;CON__ENSEMBL:ENSBTAP00000031900	P00450	24;6	24;6	24;6	Ceruloplasmin	CP	sp|P00450|CERU_HUMAN Ceruloplasmin OS=Homo sapiens OX=9606 GN=CP PE=1 SV=1	2	24	24	24	14	14	16	21	21	23	14	14	16	21	21	23	14	14	16	21	21	23	25.5	25.5	25.5	122.2	1065	1065;1064	0	290.77	By MS/MS	By MS/MS	By MS/MS	By MS/MS	By MS/MS	By MS/MS	17.2	17.4	17.7	22.6	22.4	24.3
P00491	P00491	7	7	7	Purine nucleoside phosphorylase	PNP	sp|P00491|PNPH_HUMAN Purine nucleoside phosphorylase OS=Homo sapiens OX=9606 GN=PNP PE=1 SV=2	1	7	7	7	6	5	6	6	7	6	6	5	6	6	7	6	6	5	6	6	7	6	34.3	34.3	34.3	32.118	289	289	0	83.149	By MS/MS	By MS/MS	By MS/MS	By MS/MS	By MS/MS	By MS/MS	30.8	23.2	26.6	26.6	34.3	26.6
P00492;Q9NRG1	P00492	7;1	7;1	7;1	Hypoxanthine-guanine phosphoribosyltransferase	HPRT1	sp|P00492|HPRT_HUMAN Hypoxanthine-guanine phosphoribosyltransferase OS=Homo sapiens OX=9606 GN=HPRT1 PE=1 SV=2	2	7	7	7	7	7	7	7	7	7	7	7	7	7	7	7	7	7	7	7	7	7	37.6	37.6	37.6	24.579	218	218;225	0	27.728	By MS/MS	By MS/MS	By MS/MS	By MS/MS	By MS/MS	By MS/MS	37.6	37.6	37.6	37.6	37.6	37.6
P00533;P04626;Q15303	P00533	4;1;1	4;1;1	4;1;1	Epidermal growth factor receptor	EGFR	sp|P00533|EGFR_HUMAN Epidermal growth factor receptor OS=Homo sapiens OX=9606 GN=EGFR PE=1 SV=2	3	4	4	4	1	1	1	1	3	3	1	1	1	1	3	3	1	1	1	1	3	3	4.3	4.3	4.3	134.28	1210	1210;1255;1308	0	7.3245	By matching	By MS/MS	By MS/MS	By MS/MS	By MS/MS	By MS/MS	1	1	1	1	3	3.4
P00558	P00558	23	23	19	Phosphoglycerate kinase 1	PGK1	sp|P00558|PGK1_HUMAN Phosphoglycerate kinase 1 OS=Homo sapiens OX=9606 GN=PGK1 PE=1 SV=3	1	23	23	19	21	23	21	23	23	23	21	23	21	23	23	23	17	19	17	19	19	19	65.7	65.7	54	44.614	417	417	0	323.31	By MS/MS	By MS/MS	By MS/MS	By MS/MS	By MS/MS	By MS/MS	63.3	65.7	63.3	65.7	65.7	65.7
P00568	P00568	7	7	7	Adenylate kinase isoenzyme 1	AK1	sp|P00568|KAD1_HUMAN Adenylate kinase isoenzyme 1 OS=Homo sapiens OX=9606 GN=AK1 PE=1 SV=3	1	7	7	7	6	6	7	6	5	5	6	6	7	6	5	5	6	6	7	6	5	5	42.3	42.3	42.3	21.635	194	194	0	16.295	By MS/MS	By MS/MS	By MS/MS	By MS/MS	By MS/MS	By MS/MS	38.7	32	42.3	32	25.3	25.3
P00734;CON__P00735	P00734	13;2	13;2	13;2	Prothrombin;Activation peptide fragment 1;Activation peptide fragment 2;Thrombin light chain;Thrombin heavy chain	F2	sp|P00734|THRB_HUMAN Prothrombin OS=Homo sapiens OX=9606 GN=F2 PE=1 SV=2	2	13	13	13	4	5	4	11	13	12	4	5	4	11	13	12	4	5	4	11	13	12	26.2	26.2	26.2	70.036	622	622;625	0	151.1	By MS/MS	By MS/MS	By MS/MS	By MS/MS	By MS/MS	By MS/MS	8.7	11.3	9.8	24.9	26.2	26.2
P00738;P00739	P00738;P00739	17;10	17;10	17;10	Haptoglobin;Haptoglobin alpha chain;Haptoglobin beta chain;Haptoglobin-related protein	HP;HPR	sp|P00738|HPT_HUMAN Haptoglobin OS=Homo sapiens OX=9606 GN=HP PE=1 SV=1;sp|P00739|HPTR_HUMAN Haptoglobin-related protein OS=Homo sapiens OX=9606 GN=HPR PE=2 SV=2	2	17	17	17	7	7	7	15	14	17	7	7	7	15	14	17	7	7	7	15	14	17	45.3	45.3	45.3	45.205	406	406;348	0	125.89	By MS/MS	By MS/MS	By MS/MS	By MS/MS	By MS/MS	By MS/MS	20.9	20.9	18.2	43.1	43.1	45.3
P00740	P00740	4	4	4	Coagulation factor IX;Coagulation factor IXa light chain;Coagulation factor IXa heavy chain	F9	sp|P00740|FA9_HUMAN Coagulation factor IX OS=Homo sapiens OX=9606 GN=F9 PE=1 SV=2	1	4	4	4	0	0	0	4	4	4	0	0	0	4	4	4	0	0	0	4	4	4	10	10	10	51.778	461	461	0	10.576				By MS/MS	By MS/MS	By MS/MS	0	0	0	10	10	10
P00746	P00746	3	3	3	Complement factor D	CFD	sp|P00746|CFAD_HUMAN Complement factor D OS=Homo sapiens OX=9606 GN=CFD PE=1 SV=5	1	3	3	3	2	0	0	3	3	3	2	0	0	3	3	3	2	0	0	3	3	3	19.4	19.4	19.4	27.033	253	253	0	13.388	By MS/MS			By MS/MS	By MS/MS	By MS/MS	10.7	0	0	19.4	19.4	19.4
P00747;CON__P06868;Q02325;Q15195	P00747	16;2;2;1	16;2;2;1	16;2;2;1	Plasminogen;Plasmin heavy chain A;Activation peptide;Angiostatin;Plasmin heavy chain A, short form;Plasmin light chain B	PLG	sp|P00747|PLMN_HUMAN Plasminogen OS=Homo sapiens OX=9606 GN=PLG PE=1 SV=2	4	16	16	16	11	14	14	15	16	15	11	14	14	15	16	15	11	14	14	15	16	15	26.5	26.5	26.5	90.568	810	810;812;96;96	0	122.73	By MS/MS	By MS/MS	By MS/MS	By MS/MS	By MS/MS	By MS/MS	20	23.7	24.2	25.7	26.5	26.5
P00749	P00749	7	7	7	Urokinase-type plasminogen activator;Urokinase-type plasminogen activator long chain A;Urokinase-type plasminogen activator short chain A;Urokinase-type plasminogen activator chain B	PLAU	sp|P00749|UROK_HUMAN Urokinase-type plasminogen activator OS=Homo sapiens OX=9606 GN=PLAU PE=1 SV=3	1	7	7	7	7	7	6	7	7	7	7	7	6	7	7	7	7	7	6	7	7	7	19	19	19	48.523	431	431	0	18.857	By MS/MS	By MS/MS	By MS/MS	By MS/MS	By MS/MS	By MS/MS	19	19	16.7	19	19	19
P00751	P00751	8	8	8	Complement factor B;Complement factor B Ba fragment;Complement factor B Bb fragment	CFB	sp|P00751|CFAB_HUMAN Complement factor B OS=Homo sapiens OX=9606 GN=CFB PE=1 SV=2	1	8	8	8	4	3	5	6	6	8	4	3	5	6	6	8	4	3	5	6	6	8	10.7	10.7	10.7	85.532	764	764	0	34.447	By MS/MS	By MS/MS	By MS/MS	By MS/MS	By MS/MS	By MS/MS	5.4	4.3	6.8	8.5	8.6	10.7
P00915	P00915	9	9	9	Carbonic anhydrase 1	CA1	sp|P00915|CAH1_HUMAN Carbonic anhydrase 1 OS=Homo sapiens OX=9606 GN=CA1 PE=1 SV=2	1	9	9	9	8	8	8	9	9	9	8	8	8	9	9	9	8	8	8	9	9	9	36.8	36.8	36.8	28.87	261	261	0	26.885	By MS/MS	By MS/MS	By MS/MS	By MS/MS	By MS/MS	By MS/MS	31.4	31.4	31.4	36.8	36.8	36.8
P00918	P00918	11	11	11	Carbonic anhydrase 2	CA2	sp|P00918|CAH2_HUMAN Carbonic anhydrase 2 OS=Homo sapiens OX=9606 GN=CA2 PE=1 SV=2	1	11	11	11	11	11	11	11	11	11	11	11	11	11	11	11	11	11	11	11	11	11	47.7	47.7	47.7	29.246	260	260	0	125.32	By MS/MS	By MS/MS	By MS/MS	By MS/MS	By MS/MS	By MS/MS	47.7	47.7	47.7	47.7	47.7	47.7
P00966	P00966	19	19	19	Argininosuccinate synthase	ASS1	sp|P00966|ASSY_HUMAN Argininosuccinate synthase OS=Homo sapiens OX=9606 GN=ASS1 PE=1 SV=2	1	19	19	19	18	19	17	17	18	18	18	19	17	17	18	18	18	19	17	17	18	18	38.8	38.8	38.8	46.53	412	412	0	131.18	By MS/MS	By MS/MS	By MS/MS	By MS/MS	By MS/MS	By MS/MS	36.9	38.8	34.7	36.9	33.3	33.3
P00973	P00973	2	2	2	2-5-oligoadenylate synthase 1	OAS1	sp|P00973|OAS1_HUMAN 2-5-oligoadenylate synthase 1 OS=Homo sapiens OX=9606 GN=OAS1 PE=1 SV=4	1	2	2	2	2	2	2	0	2	2	2	2	2	0	2	2	2	2	2	0	2	2	8.5	8.5	8.5	46.028	400	400	0	9.1836	By MS/MS	By MS/MS	By MS/MS		By MS/MS	By MS/MS	8.5	8.5	8.5	0	8.5	8.5
P01008;CON__P41361	P01008	12;3	12;3	12;3	Antithrombin-III	SERPINC1	sp|P01008|ANT3_HUMAN Antithrombin-III OS=Homo sapiens OX=9606 GN=SERPINC1 PE=1 SV=1	2	12	12	12	5	3	3	12	12	12	5	3	3	12	12	12	5	3	3	12	12	12	25.9	25.9	25.9	52.602	464	464;465	0	106.63	By MS/MS	By MS/MS	By MS/MS	By MS/MS	By MS/MS	By MS/MS	13.6	7.8	7.8	25.9	25.9	25.9
P01009;P20848	P01009	23;1	23;1	23;1	Alpha-1-antitrypsin;Short peptide from AAT	SERPINA1	sp|P01009|A1AT_HUMAN Alpha-1-antitrypsin OS=Homo sapiens OX=9606 GN=SERPINA1 PE=1 SV=3	2	23	23	23	22	21	20	22	21	22	22	21	20	22	21	22	22	21	20	22	21	22	57.7	57.7	57.7	46.736	418	418;421	0	323.31	By MS/MS	By MS/MS	By MS/MS	By MS/MS	By MS/MS	By MS/MS	54.8	53.6	53.6	56	56	56
P01011	P01011	11	11	11	Alpha-1-antichymotrypsin;Alpha-1-antichymotrypsin His-Pro-less	SERPINA3	sp|P01011|AACT_HUMAN Alpha-1-antichymotrypsin OS=Homo sapiens OX=9606 GN=SERPINA3 PE=1 SV=2	1	11	11	11	9	8	7	11	11	11	9	8	7	11	11	11	9	8	7	11	11	11	28.1	28.1	28.1	47.65	423	423	0	62.024	By MS/MS	By MS/MS	By MS/MS	By MS/MS	By MS/MS	By MS/MS	28.1	23.6	19.9	28.1	28.1	28.1
P01019	P01019	5	5	5	Angiotensinogen;Angiotensin-1;Angiotensin-2;Angiotensin-3;Angiotensin-4;Angiotensin 1-9;Angiotensin 1-7;Angiotensin 1-5;Angiotensin 1-4	AGT	sp|P01019|ANGT_HUMAN Angiotensinogen OS=Homo sapiens OX=9606 GN=AGT PE=1 SV=3	1	5	5	5	4	4	3	5	4	4	4	4	3	5	4	4	4	4	3	5	4	4	12.2	12.2	12.2	53.154	485	485	0	37.508	By MS/MS	By MS/MS	By MS/MS	By MS/MS	By MS/MS	By MS/MS	10.7	10.7	8.2	12.2	10.7	10.7
P01023;CON__ENSEMBL:ENSBTAP00000024146;P20742	P01023	20;2;1	20;2;1	20;2;1	Alpha-2-macroglobulin	A2M	sp|P01023|A2MG_HUMAN Alpha-2-macroglobulin OS=Homo sapiens OX=9606 GN=A2M PE=1 SV=3	3	20	20	20	18	16	18	17	16	16	18	16	18	17	16	16	18	16	18	17	16	16	18.2	18.2	18.2	163.29	1474	1474;1477;1482	0	83.35	By MS/MS	By MS/MS	By MS/MS	By MS/MS	By MS/MS	By MS/MS	16.9	14.6	16.5	15.4	14.2	14.6
P01024;CON__Q2UVX4	P01024	47;6	47;6	47;6	Complement C3;Complement C3 beta chain;C3-beta-c;Complement C3 alpha chain;C3a anaphylatoxin;Acylation stimulating protein;Complement C3b alpha chain;Complement C3c alpha chain fragment 1;Complement C3dg fragment;Complement C3g fragment;Complement C3d fragment;Complement C3f fragment;Complement C3c alpha chain fragment 2	C3	sp|P01024|CO3_HUMAN Complement C3 OS=Homo sapiens OX=9606 GN=C3 PE=1 SV=2	2	47	47	47	31	32	30	44	45	44	31	32	30	44	45	44	31	32	30	44	45	44	33.8	33.8	33.8	187.15	1663	1663;1662	0	249.95	By MS/MS	By MS/MS	By MS/MS	By MS/MS	By MS/MS	By MS/MS	21.6	22.2	21.7	31.2	32.5	31.6
P01031;CON__Q1A7A4	P01031	13;3	13;3	13;3	Complement C5;Complement C5 beta chain;Complement C5 alpha chain;C5a anaphylatoxin;Complement C5 alpha chain	C5	sp|P01031|CO5_HUMAN Complement C5 OS=Homo sapiens OX=9606 GN=C5 PE=1 SV=4	2	13	13	13	2	3	1	13	11	11	2	3	1	13	11	11	2	3	1	13	11	11	7.5	7.5	7.5	188.3	1676	1676;1677	0	19.76	By matching	By matching	By matching	By MS/MS	By MS/MS	By MS/MS	0.8	1.4	0.4	7.5	6.1	6.1
P01033	P01033	3	3	3	Metalloproteinase inhibitor 1	TIMP1	sp|P01033|TIMP1_HUMAN Metalloproteinase inhibitor 1 OS=Homo sapiens OX=9606 GN=TIMP1 PE=1 SV=1	1	3	3	3	2	3	3	1	2	1	2	3	3	1	2	1	2	3	3	1	2	1	24.6	24.6	24.6	23.171	207	207	0	6.3509	By MS/MS	By MS/MS	By MS/MS	By matching	By matching	By matching	15.5	24.6	24.6	5.8	18.8	5.8
P01034	P01034	4	4	4	Cystatin-C	CST3	sp|P01034|CYTC_HUMAN Cystatin-C OS=Homo sapiens OX=9606 GN=CST3 PE=1 SV=1	1	4	4	4	4	4	4	4	4	4	4	4	4	4	4	4	4	4	4	4	4	4	37	37	37	15.799	146	146	0	28.897	By MS/MS	By MS/MS	By MS/MS	By MS/MS	By MS/MS	By MS/MS	37	37	37	37	37	37
P01040	P01040	4	4	4	Cystatin-A;Cystatin-A, N-terminally processed	CSTA	sp|P01040|CYTA_HUMAN Cystatin-A OS=Homo sapiens OX=9606 GN=CSTA PE=1 SV=1	1	4	4	4	4	4	4	4	4	4	4	4	4	4	4	4	4	4	4	4	4	4	50	50	50	11.006	98	98	0	19.692	By MS/MS	By MS/MS	By MS/MS	By MS/MS	By MS/MS	By MS/MS	50	50	50	50	50	50
P01042	P01042	17	17	17	Kininogen-1;Kininogen-1 heavy chain;T-kinin;Bradykinin;Lysyl-bradykinin;Kininogen-1 light chain;Low molecular weight growth-promoting factor	KNG1	sp|P01042|KNG1_HUMAN Kininogen-1 OS=Homo sapiens OX=9606 GN=KNG1 PE=1 SV=2	1	17	17	17	17	17	15	17	17	17	17	17	15	17	17	17	17	17	15	17	17	17	26.9	26.9	26.9	71.957	644	644	0	135.79	By MS/MS	By MS/MS	By MS/MS	By MS/MS	By MS/MS	By MS/MS	26.9	26.9	23	26.9	26.9	26.9
P01111	P01111	8	8	4	GTPase NRas	NRAS	sp|P01111|RASN_HUMAN GTPase NRas OS=Homo sapiens OX=9606 GN=NRAS PE=1 SV=1	1	8	8	4	8	8	8	8	8	8	8	8	8	8	8	8	4	4	4	4	4	4	43.9	43.9	18.5	21.229	189	189	0	70.427	By MS/MS	By MS/MS	By MS/MS	By MS/MS	By MS/MS	By MS/MS	43.9	43.9	43.9	43.9	43.9	43.9
P01112	P01112	6	3	2	GTPase HRas;GTPase HRas, N-terminally processed	HRAS	sp|P01112|RASH_HUMAN GTPase HRas OS=Homo sapiens OX=9606 GN=HRAS PE=1 SV=1	1	6	3	2	5	5	5	5	5	6	2	2	2	2	2	3	1	1	1	1	1	2	40.2	21.2	13.2	21.298	189	189	0	38.993	By matching	By MS/MS	By MS/MS	By MS/MS	By MS/MS	By MS/MS	33.9	33.9	33.9	33.9	33.9	40.2
P01116	P01116	5	2	2	GTPase KRas;GTPase KRas, N-terminally processed	KRAS	sp|P01116|RASK_HUMAN GTPase KRas OS=Homo sapiens OX=9606 GN=KRAS PE=1 SV=1	1	5	2	2	4	4	5	4	4	4	1	1	2	1	1	1	1	1	2	1	1	1	31.7	11.6	11.6	21.656	189	189	0	7.488	By MS/MS	By MS/MS	By MS/MS	By MS/MS	By MS/MS	By MS/MS	27	27	31.7	27	27	27
P01133	P01133	26	26	26	Pro-epidermal growth factor;Epidermal growth factor	EGF	sp|P01133|EGF_HUMAN Pro-epidermal growth factor OS=Homo sapiens OX=9606 GN=EGF PE=1 SV=2	1	26	26	26	25	25	24	25	25	26	25	25	24	25	25	26	25	25	24	25	25	26	26.1	26.1	26.1	133.99	1207	1207	0	184.07	By MS/MS	By MS/MS	By MS/MS	By MS/MS	By MS/MS	By MS/MS	24.6	24.6	23.9	24.6	24.6	26.1
P01591	P01591	6	6	6	Immunoglobulin J chain	IGJ	sp|P01591|IGJ_HUMAN Immunoglobulin J chain OS=Homo sapiens OX=9606 GN=JCHAIN PE=1 SV=4	1	6	6	6	6	6	5	6	6	6	6	6	5	6	6	6	6	6	5	6	6	6	60.4	60.4	60.4	18.098	159	159	0	89.216	By MS/MS	By MS/MS	By MS/MS	By MS/MS	By MS/MS	By MS/MS	60.4	60.4	36.5	60.4	60.4	60.4
P01594;P01593	P01594;P01593	1;1	1;1	1;1	Ig kappa chain V-I region AU;Ig kappa chain V-I region AG		sp|P01594|KV133_HUMAN Immunoglobulin kappa variable 1-33 OS=Homo sapiens OX=9606 GN=IGKV1-33 PE=1 SV=2;sp|P01593|KVD33_HUMAN Immunoglobulin kappa variable 1D-33 OS=Homo sapiens OX=9606 GN=IGKV1D-33 PE=1 SV=2	2	1	1	1	1	1	1	1	0	0	1	1	1	1	0	0	1	1	1	1	0	0	13.7	13.7	13.7	12.848	117	117;117	0.00079365	3.0748	By matching	By MS/MS	By MS/MS	By matching			13.7	13.7	13.7	13.7	0	0
P01619	P01619	1	1	1	Ig kappa chain V-III region B6		sp|P01619|KV320_HUMAN Immunoglobulin kappa variable 3-20 OS=Homo sapiens OX=9606 GN=IGKV3-20 PE=1 SV=2	1	1	1	1	1	1	1	1	1	1	1	1	1	1	1	1	1	1	1	1	1	1	7.8	7.8	7.8	12.557	116	116	0.0011499	2.6118	By MS/MS	By MS/MS	By MS/MS	By MS/MS	By MS/MS	By MS/MS	7.8	7.8	7.8	7.8	7.8	7.8
P01714	P01714	2	2	2	Ig lambda chain V-III region SH		sp|P01714|LV319_HUMAN Immunoglobulin lambda variable 3-19 OS=Homo sapiens OX=9606 GN=IGLV3-19 PE=1 SV=2	1	2	2	2	2	2	1	1	0	1	2	2	1	1	0	1	2	2	1	1	0	1	18.8	18.8	18.8	12.042	112	112	0.00085397	4.0679	By MS/MS	By matching	By MS/MS	By MS/MS		By MS/MS	18.8	18.8	10.7	8	0	8
P0DP03;P01768;P01764	P0DP03;P01768;P01764	1;1;1	1;1;1	1;1;1	Ig heavy chain V-III region CAM;Ig heavy chain V-III region 23	IGHV3-23	sp|P0DP03|HVC05_HUMAN Immunoglobulin heavy variable 3-30-5 OS=Homo sapiens OX=9606 GN=IGHV3-30-5 PE=3 SV=1;sp|P01768|HV330_HUMAN Immunoglobulin heavy variable 3-30 OS=Homo sapiens OX=9606 GN=IGHV3-30 PE=1 SV=2;sp|P01764|HV323_HUMAN Immunoglobulin heavy var	3	1	1	1	1	1	1	1	1	1	1	1	1	1	1	1	1	1	1	1	1	1	9.4	9.4	9.4	12.947	117	117;117;117	0.00081433	3.441	By MS/MS	By MS/MS	By MS/MS	By MS/MS	By MS/MS	By MS/MS	9.4	9.4	9.4	9.4	9.4	9.4
P01780	P01780	2	1	1	Ig heavy chain V-III region JON		sp|P01780|HV307_HUMAN Immunoglobulin heavy variable 3-7 OS=Homo sapiens OX=9606 GN=IGHV3-7 PE=1 SV=2	1	2	1	1	2	2	2	2	2	2	1	1	1	1	1	1	1	1	1	1	1	1	17.1	7.7	7.7	12.943	117	117	0.0065359	1.5611	By MS/MS	By MS/MS	By MS/MS	By MS/MS	By MS/MS	By MS/MS	17.1	17.1	17.1	17.1	17.1	17.1
P01833	P01833	26	26	26	Polymeric immunoglobulin receptor;Secretory component	PIGR	sp|P01833|PIGR_HUMAN Polymeric immunoglobulin receptor OS=Homo sapiens OX=9606 GN=PIGR PE=1 SV=4	1	26	26	26	25	24	23	24	24	22	25	24	23	24	24	22	25	24	23	24	24	22	43.1	43.1	43.1	83.283	764	764	0	323.31	By MS/MS	By MS/MS	By MS/MS	By MS/MS	By MS/MS	By MS/MS	40.6	39.5	38.1	41	40.6	37
P01834	P01834	6	1	1	Ig kappa chain C region	IGKC	sp|P01834|IGKC_HUMAN Immunoglobulin kappa constant OS=Homo sapiens OX=9606 GN=IGKC PE=1 SV=2	1	6	1	1	6	6	4	5	6	6	1	1	1	1	1	1	1	1	1	1	1	1	71	16.8	16.8	11.765	107	107	0	9.3285	By MS/MS	By MS/MS	By MS/MS	By MS/MS	By MS/MS	By MS/MS	71	71	52.3	71	71	71
P0DOX5;P01857	P0DOX5;P01857	9;9	9;9	6;6	Ig gamma-1 chain C region	IGHG1	sp|P0DOX5|IGG1_HUMAN Immunoglobulin gamma-1 heavy chain OS=Homo sapiens OX=9606 PE=1 SV=2;sp|P01857|IGHG1_HUMAN Immunoglobulin heavy constant gamma 1 OS=Homo sapiens OX=9606 GN=IGHG1 PE=1 SV=2	2	9	9	6	8	8	9	9	9	7	8	8	9	9	9	7	5	5	6	6	6	5	24.3	24.3	18.9	49.328	449	449;399	0	63.147	By MS/MS	By MS/MS	By MS/MS	By MS/MS	By MS/MS	By MS/MS	24.3	24.3	24.3	24.3	24.3	22
P01859	P01859	8	4	3	Ig gamma-2 chain C region	IGHG2	sp|P01859|IGHG2_HUMAN Immunoglobulin heavy constant gamma 2 OS=Homo sapiens OX=9606 GN=IGHG2 PE=1 SV=3	1	8	4	3	7	8	8	8	8	7	4	4	4	4	4	4	3	3	3	3	3	3	27.3	15.9	12.4	43.805	395	395	0	22.106	By MS/MS	By MS/MS	By MS/MS	By MS/MS	By MS/MS	By MS/MS	24.3	27.3	27.3	27.3	27.3	24.8
P01860	P01860	8	5	3	Ig gamma-3 chain C region	IGHG3	sp|P01860|IGHG3_HUMAN Immunoglobulin heavy constant gamma 3 OS=Homo sapiens OX=9606 GN=IGHG3 PE=1 SV=3	1	8	5	3	7	7	8	8	8	7	4	4	5	5	5	5	3	2	3	3	3	3	23.3	16.4	10.1	49.092	446	446	0	28.161	By MS/MS	By MS/MS	By MS/MS	By MS/MS	By MS/MS	By MS/MS	20.6	18.6	23.3	23.3	23.3	21.1
P01861	P01861	5	1	1	Ig gamma-4 chain C region	IGHG4	sp|P01861|IGHG4_HUMAN Immunoglobulin heavy constant gamma 4 OS=Homo sapiens OX=9606 GN=IGHG4 PE=1 SV=2	1	5	1	1	3	4	5	5	5	4	0	0	1	1	1	1	0	0	1	1	1	1	15.2	4.3	4.3	43.831	396	396	0.00080939	3.3464	By matching	By matching	By MS/MS	By MS/MS	By MS/MS	By matching	7.8	10.9	15.2	15.2	15.2	12.6
P01871	P01871	11	11	4	Ig mu chain C region	IGHM	sp|P01871|IGHM_HUMAN Immunoglobulin heavy constant mu OS=Homo sapiens OX=9606 GN=IGHM PE=1 SV=5	1	11	11	4	11	11	11	11	10	11	11	11	11	11	10	11	4	4	4	4	3	4	27.6	27.6	8.9	51.923	474	474	0	92.98	By MS/MS	By MS/MS	By MS/MS	By MS/MS	By MS/MS	By MS/MS	27.6	27.6	27.6	27.6	24.9	27.6
P01876	P01876	15	15	9	Ig alpha-1 chain C region	IGHA1	sp|P01876|IGHA1_HUMAN Immunoglobulin heavy constant alpha 1 OS=Homo sapiens OX=9606 GN=IGHA1 PE=1 SV=3	1	15	15	9	15	15	15	14	15	15	15	15	15	14	15	15	9	9	9	8	9	9	42.5	42.5	34.2	42.848	398	398	0	225.1	By MS/MS	By MS/MS	By MS/MS	By MS/MS	By MS/MS	By MS/MS	42.5	42.5	42.5	42.5	42.5	42.5
P01889	P01889	5	1	1	HLA class I histocompatibility antigen, B-7 alpha chain	HLA-B	sp|P01889|HLAB_HUMAN HLA class I histocompatibility antigen, B alpha chain OS=Homo sapiens OX=9606 GN=HLA-B PE=1 SV=3	1	5	1	1	5	5	5	5	4	5	1	1	1	1	1	1	1	1	1	1	1	1	18.8	5.5	5.5	40.46	362	362	0	51.926	By MS/MS	By MS/MS	By MS/MS	By MS/MS	By MS/MS	By MS/MS	18.8	18.8	18.8	18.8	16.3	18.8
P01903;P01906	P01903	6;1	6;1	6;1	HLA class II histocompatibility antigen, DR alpha chain	HLA-DRA	sp|P01903|DRA_HUMAN HLA class II histocompatibility antigen, DR alpha chain OS=Homo sapiens OX=9606 GN=HLA-DRA PE=1 SV=2	2	6	6	6	6	6	6	4	4	4	6	6	6	4	4	4	6	6	6	4	4	4	27.2	27.2	27.2	28.621	254	254;255	0	37.935	By MS/MS	By MS/MS	By MS/MS	By MS/MS	By MS/MS	By MS/MS	27.2	27.2	27.2	16.9	16.9	16.9
P01911	P01911	6	3	1	HLA class II histocompatibility antigen, DRB1-15 beta chain	HLA-DRB1	sp|P01911|DRB1_HUMAN HLA class II histocompatibility antigen, DRB1 beta chain OS=Homo sapiens OX=9606 GN=HLA-DRB1 PE=1 SV=2	1	6	3	1	6	6	6	6	6	6	3	3	3	3	3	3	1	1	1	1	1	1	30.8	12.8	4.9	29.966	266	266	0	5.4875	By MS/MS	By MS/MS	By MS/MS	By MS/MS	By MS/MS	By MS/MS	30.8	30.8	30.8	30.8	30.8	30.8
P01920	P01920	1	1	1	HLA class II histocompatibility antigen, DQ beta 1 chain	HLA-DQB1	sp|P01920|DQB1_HUMAN HLA class II histocompatibility antigen, DQ beta 1 chain OS=Homo sapiens OX=9606 GN=HLA-DQB1 PE=1 SV=2	1	1	1	1	1	1	1	0	0	0	1	1	1	0	0	0	1	1	1	0	0	0	4.2	4.2	4.2	29.991	261	261	0.0052503	1.753	By MS/MS	By MS/MS	By MS/MS				4.2	4.2	4.2	0	0	0
P02042;CON__Q3SX09;CON__P02070;P02100	P02042	8;2;1;1	3;0;0;0	3;0;0;0	Hemoglobin subunit delta	HBD	sp|P02042|HBD_HUMAN Hemoglobin subunit delta OS=Homo sapiens OX=9606 GN=HBD PE=1 SV=2	4	8	3	3	5	6	4	7	7	8	1	1	1	3	2	3	1	1	1	3	2	3	60.5	23.1	23.1	16.055	147	147;201;145;147	0	6.6502	By matching	By matching	By matching	By MS/MS	By MS/MS	By MS/MS	37.4	45.6	32.7	53.7	54.4	60.5
P02144	P02144	4	4	4	Myoglobin	MB	sp|P02144|MYG_HUMAN Myoglobin OS=Homo sapiens OX=9606 GN=MB PE=1 SV=2	1	4	4	4	4	3	2	4	4	4	4	3	2	4	4	4	4	3	2	4	4	4	34.4	34.4	34.4	17.184	154	154	0	53.857	By MS/MS	By MS/MS	By MS/MS	By MS/MS	By MS/MS	By MS/MS	34.4	28.6	19.5	34.4	34.4	34.4
P02489	P02489	4	4	4	Alpha-crystallin A chain;Alpha-crystallin A(1-172);Alpha-crystallin A(1-168);Alpha-crystallin A(1-162)	CRYAA	sp|P02489|CRYAA_HUMAN Alpha-crystallin A chain OS=Homo sapiens OX=9606 GN=CRYAA PE=1 SV=2	1	4	4	4	3	3	2	3	2	3	3	3	2	3	2	3	3	3	2	3	2	3	25.4	25.4	25.4	19.909	173	173	0	8.6555	By MS/MS	By MS/MS	By matching	By MS/MS	By MS/MS	By MS/MS	19.7	19.1	13.3	19.7	13.3	19.7
P02511	P02511	9	9	9	Alpha-crystallin B chain	CRYAB	sp|P02511|CRYAB_HUMAN Alpha-crystallin B chain OS=Homo sapiens OX=9606 GN=CRYAB PE=1 SV=2	1	9	9	9	9	8	9	8	9	9	9	8	9	8	9	9	9	8	9	8	9	9	45.1	45.1	45.1	20.159	175	175	0	24.82	By MS/MS	By MS/MS	By MS/MS	By MS/MS	By MS/MS	By MS/MS	45.1	41.1	45.1	41.1	45.1	45.1
P02647	P02647	16	16	16	Apolipoprotein A-I;Proapolipoprotein A-I;Truncated apolipoprotein A-I	APOA1	sp|P02647|APOA1_HUMAN Apolipoprotein A-I OS=Homo sapiens OX=9606 GN=APOA1 PE=1 SV=1	1	16	16	16	14	13	13	16	16	16	14	13	13	16	16	16	14	13	13	16	16	16	55.1	55.1	55.1	30.777	267	267	0	133.97	By MS/MS	By MS/MS	By MS/MS	By MS/MS	By MS/MS	By MS/MS	51.7	48.7	48.7	55.1	55.1	55.1
P02649;CON__Q03247	P02649	18;3	18;3	18;3	Apolipoprotein E	APOE	sp|P02649|APOE_HUMAN Apolipoprotein E OS=Homo sapiens OX=9606 GN=APOE PE=1 SV=1	2	18	18	18	17	17	18	17	18	18	17	17	18	17	18	18	17	17	18	17	18	18	50.2	50.2	50.2	36.154	317	317;316	0	150.74	By MS/MS	By MS/MS	By MS/MS	By MS/MS	By MS/MS	By MS/MS	44.8	44.8	50.2	49.2	50.2	50.2
P02652	P02652	2	2	2	Apolipoprotein A-II;Proapolipoprotein A-II;Truncated apolipoprotein A-II	APOA2	sp|P02652|APOA2_HUMAN Apolipoprotein A-II OS=Homo sapiens OX=9606 GN=APOA2 PE=1 SV=1	1	2	2	2	1	1	1	2	2	2	1	1	1	2	2	2	1	1	1	2	2	2	17	17	17	11.175	100	100	0.00082372	3.6152	By matching	By matching	By matching	By matching	By MS/MS	By MS/MS	9	9	9	17	17	17
P02654	P02654	1	1	1	Apolipoprotein C-I;Truncated apolipoprotein C-I	APOC1	sp|P02654|APOC1_HUMAN Apolipoprotein C-I OS=Homo sapiens OX=9606 GN=APOC1 PE=1 SV=1	1	1	1	1	1	1	1	1	1	1	1	1	1	1	1	1	1	1	1	1	1	1	10.8	10.8	10.8	9.3318	83	83	0.0029091	2.0741	By MS/MS	By MS/MS	By MS/MS	By MS/MS	By MS/MS	By MS/MS	10.8	10.8	10.8	10.8	10.8	10.8
P02656	P02656	2	2	2	Apolipoprotein C-III	APOC3	sp|P02656|APOC3_HUMAN Apolipoprotein C-III OS=Homo sapiens OX=9606 GN=APOC3 PE=1 SV=1	1	2	2	2	2	2	2	2	2	2	2	2	2	2	2	2	2	2	2	2	2	2	27.3	27.3	27.3	10.852	99	99	0	22.503	By MS/MS	By MS/MS	By MS/MS	By MS/MS	By MS/MS	By MS/MS	27.3	27.3	27.3	27.3	27.3	27.3
P02671	P02671	19	19	19	Fibrinogen alpha chain;Fibrinopeptide A;Fibrinogen alpha chain	FGA	sp|P02671|FIBA_HUMAN Fibrinogen alpha chain OS=Homo sapiens OX=9606 GN=FGA PE=1 SV=2	1	19	19	19	8	9	10	19	17	17	8	9	10	19	17	17	8	9	10	19	17	17	23.2	23.2	23.2	94.972	866	866	0	198.9	By MS/MS	By MS/MS	By MS/MS	By MS/MS	By MS/MS	By MS/MS	11.5	11.9	13.6	23.2	22.2	20.1
P02675;CON__P02676	P02675	17;4	17;4	17;4	Fibrinogen beta chain;Fibrinopeptide B;Fibrinogen beta chain	FGB	sp|P02675|FIBB_HUMAN Fibrinogen beta chain OS=Homo sapiens OX=9606 GN=FGB PE=1 SV=2	2	17	17	17	9	10	11	16	16	16	9	10	11	16	16	16	9	10	11	16	16	16	46.6	46.6	46.6	55.928	491	491;495	0	270.69	By MS/MS	By MS/MS	By MS/MS	By MS/MS	By MS/MS	By MS/MS	20.2	22.8	25.9	45.2	45.2	44
P02679	P02679	18	18	18	Fibrinogen gamma chain	FGG	sp|P02679|FIBG_HUMAN Fibrinogen gamma chain OS=Homo sapiens OX=9606 GN=FGG PE=1 SV=3	1	18	18	18	10	9	11	16	16	16	10	9	11	16	16	16	10	9	11	16	16	16	42.2	42.2	42.2	51.511	453	453	0	110.88	By MS/MS	By MS/MS	By MS/MS	By MS/MS	By MS/MS	By MS/MS	22.1	21.4	25.2	37.1	38	37.7
P02686	P02686	3	3	3	Myelin basic protein	MBP	sp|P02686|MBP_HUMAN Myelin basic protein OS=Homo sapiens OX=9606 GN=MBP PE=1 SV=3	1	3	3	3	3	3	3	3	3	3	3	3	3	3	3	3	3	3	3	3	3	3	17.4	17.4	17.4	33.117	304	304	0	58.361	By MS/MS	By MS/MS	By MS/MS	By MS/MS	By MS/MS	By MS/MS	17.4	17.4	17.4	17.4	17.4	17.4
P02730	P02730	2	2	2	Band 3 anion transport protein	SLC4A1	sp|P02730|B3AT_HUMAN Band 3 anion transport protein OS=Homo sapiens OX=9606 GN=SLC4A1 PE=1 SV=3	1	2	2	2	2	1	1	0	2	1	2	1	1	0	2	1	2	1	1	0	2	1	3	3	3	101.79	911	911	0	6.7398	By MS/MS	By MS/MS	By MS/MS		By MS/MS	By matching	3	1.4	1.4	0	3	1.5
P02741	P02741	1	1	1	C-reactive protein;C-reactive protein(1-205)	CRP	sp|P02741|CRP_HUMAN C-reactive protein OS=Homo sapiens OX=9606 GN=CRP PE=1 SV=1	1	1	1	1	0	0	0	1	1	1	0	0	0	1	1	1	0	0	0	1	1	1	4.5	4.5	4.5	25.038	224	224	0.004947	1.8366				By MS/MS	By MS/MS	By matching	0	0	0	4.5	4.5	4.5
P02743	P02743	2	2	2	Serum amyloid P-component;Serum amyloid P-component(1-203)	APCS	sp|P02743|SAMP_HUMAN Serum amyloid P-component OS=Homo sapiens OX=9606 GN=APCS PE=1 SV=2	1	2	2	2	2	2	1	2	2	2	2	2	1	2	2	2	2	2	1	2	2	2	12.6	12.6	12.6	25.387	223	223	0	55.056	By MS/MS	By MS/MS	By MS/MS	By MS/MS	By MS/MS	By MS/MS	12.6	12.6	5.8	12.6	12.6	12.6
P02748;CON__Q3MHN2	P02748	16;2	16;2	16;2	Complement component C9;Complement component C9a;Complement component C9b	C9	sp|P02748|CO9_HUMAN Complement component C9 OS=Homo sapiens OX=9606 GN=C9 PE=1 SV=2	2	16	16	16	8	7	7	12	15	15	8	7	7	12	15	15	8	7	7	12	15	15	27.9	27.9	27.9	63.173	559	559;548	0	95.192	By MS/MS	By MS/MS	By MS/MS	By MS/MS	By MS/MS	By MS/MS	15.9	14	13.8	24.5	25.9	27.9
P02749	P02749	4	4	4	Beta-2-glycoprotein 1	APOH	sp|P02749|APOH_HUMAN Beta-2-glycoprotein 1 OS=Homo sapiens OX=9606 GN=APOH PE=1 SV=3	1	4	4	4	3	2	2	3	4	3	3	2	2	3	4	3	3	2	2	3	4	3	18	18	18	38.298	345	345	0	33.19	By MS/MS	By MS/MS	By MS/MS	By MS/MS	By MS/MS	By MS/MS	13.9	8.7	8.7	15.4	18	12.8
P02750	P02750	7	7	7	Leucine-rich alpha-2-glycoprotein	LRG1	sp|P02750|A2GL_HUMAN Leucine-rich alpha-2-glycoprotein OS=Homo sapiens OX=9606 GN=LRG1 PE=1 SV=2	1	7	7	7	6	5	5	6	5	6	6	5	5	6	5	6	6	5	5	6	5	6	17.9	17.9	17.9	38.177	347	347	0	26.98	By MS/MS	By MS/MS	By MS/MS	By MS/MS	By MS/MS	By MS/MS	15.6	12.7	13.5	15.6	12.7	15
P02751	P02751	22	22	22	Fibronectin;Anastellin;Ugl-Y1;Ugl-Y2;Ugl-Y3	FN1	sp|P02751|FINC_HUMAN Fibronectin OS=Homo sapiens OX=9606 GN=FN1 PE=1 SV=5	1	22	22	22	10	7	10	20	19	19	10	7	10	20	19	19	10	7	10	20	19	19	13.6	13.6	13.6	272.32	2477	2477	0	130.72	By MS/MS	By MS/MS	By MS/MS	By MS/MS	By MS/MS	By MS/MS	6.3	4.4	6	12.2	12.7	12.6
P02753	P02753	6	6	6	Retinol-binding protein 4;Plasma retinol-binding protein(1-182);Plasma retinol-binding protein(1-181);Plasma retinol-binding protein(1-179);Plasma retinol-binding protein(1-176)	RBP4	sp|P02753|RET4_HUMAN Retinol-binding protein 4 OS=Homo sapiens OX=9606 GN=RBP4 PE=1 SV=3	1	6	6	6	2	4	2	6	5	6	2	4	2	6	5	6	2	4	2	6	5	6	37.8	37.8	37.8	23.01	201	201	0	41.212	By MS/MS	By MS/MS	By MS/MS	By MS/MS	By MS/MS	By MS/MS	15.9	20.9	14.9	37.8	32.3	37.8
P02760;CON__P00978	P02760	10;1	10;1	10;1	Protein AMBP;Alpha-1-microglobulin;Inter-alpha-trypsin inhibitor light chain;Trypstatin	AMBP	sp|P02760|AMBP_HUMAN Protein AMBP OS=Homo sapiens OX=9606 GN=AMBP PE=1 SV=1	2	10	10	10	9	9	7	9	9	9	9	9	7	9	9	9	9	9	7	9	9	9	38.4	38.4	38.4	38.999	352	352;352	0	77.838	By MS/MS	By MS/MS	By MS/MS	By MS/MS	By MS/MS	By MS/MS	37.5	37.5	30.7	38.1	38.1	38.1
P02763	P02763	5	5	3	Alpha-1-acid glycoprotein 1	ORM1	sp|P02763|A1AG1_HUMAN Alpha-1-acid glycoprotein 1 OS=Homo sapiens OX=9606 GN=ORM1 PE=1 SV=2	1	5	5	3	5	5	5	5	5	5	5	5	5	5	5	5	3	3	3	3	3	3	26.4	26.4	18.4	23.539	201	201	0	32.391	By MS/MS	By MS/MS	By MS/MS	By MS/MS	By MS/MS	By MS/MS	26.4	26.4	26.4	26.4	26.4	26.4
P02765;CON__P12763	P02765	7;2	7;2	7;2	Alpha-2-HS-glycoprotein;Alpha-2-HS-glycoprotein chain A;Alpha-2-HS-glycoprotein chain B	AHSG	sp|P02765|FETUA_HUMAN Alpha-2-HS-glycoprotein OS=Homo sapiens OX=9606 GN=AHSG PE=1 SV=2	2	7	7	7	5	4	5	6	7	7	5	4	5	6	7	7	5	4	5	6	7	7	25.1	25.1	25.1	39.34	367	367;359	0	44.44	By MS/MS	By MS/MS	By MS/MS	By MS/MS	By MS/MS	By MS/MS	13.9	12	13.9	19.6	25.1	25.1
P02766	P02766	2	2	2	Transthyretin	TTR	sp|P02766|TTHY_HUMAN Transthyretin OS=Homo sapiens OX=9606 GN=TTR PE=1 SV=1	1	2	2	2	2	2	2	2	2	2	2	2	2	2	2	2	2	2	2	2	2	2	23.8	23.8	23.8	15.887	147	147	0	134.2	By MS/MS	By MS/MS	By MS/MS	By MS/MS	By MS/MS	By MS/MS	23.8	23.8	23.8	23.8	23.8	23.8
P02774	P02774	1	1	1	Vitamin D-binding protein	GC	sp|P02774|VTDB_HUMAN Vitamin D-binding protein OS=Homo sapiens OX=9606 GN=GC PE=1 SV=2	1	1	1	1	1	0	1	0	1	1	1	0	1	0	1	1	1	0	1	0	1	1	4.2	4.2	4.2	52.917	474	474	0	5.4614	By matching		By matching		By MS/MS	By MS/MS	4.2	0	4.2	0	4.2	4.2
P02787;CON__Q2HJF0	P02787	31;1	31;1	30;1	Serotransferrin	TF	sp|P02787|TRFE_HUMAN Serotransferrin OS=Homo sapiens OX=9606 GN=TF PE=1 SV=4	2	31	31	30	26	25	26	31	28	27	26	25	26	31	28	27	26	25	26	30	28	27	48.1	48.1	47	77.049	698	698;622	0	269.62	By MS/MS	By MS/MS	By MS/MS	By MS/MS	By MS/MS	By MS/MS	41.7	41.5	41.7	48.1	45.4	44.3
P02788	P02788	22	22	21	Lactotransferrin;Lactoferricin-H;Kaliocin-1;Lactoferroxin-A;Lactoferroxin-B;Lactoferroxin-C	LTF	sp|P02788|TRFL_HUMAN Lactotransferrin OS=Homo sapiens OX=9606 GN=LTF PE=1 SV=6	1	22	22	21	19	21	21	12	14	13	19	21	21	12	14	13	18	20	20	12	14	13	41.3	41.3	39.6	78.181	710	710	0	233.98	By MS/MS	By MS/MS	By MS/MS	By MS/MS	By MS/MS	By MS/MS	36.3	40	39.7	22	26.2	24.5
P02790	P02790	7	7	7	Hemopexin	HPX	sp|P02790|HEMO_HUMAN Hemopexin OS=Homo sapiens OX=9606 GN=HPX PE=1 SV=2	1	7	7	7	7	4	6	7	7	7	7	4	6	7	7	7	7	4	6	7	7	7	18.8	18.8	18.8	51.676	462	462	0	47.081	By MS/MS	By MS/MS	By MS/MS	By MS/MS	By MS/MS	By MS/MS	18.8	10	13.6	18.8	18.8	18.8
P02792	P02792	8	8	8	Ferritin light chain	FTL	sp|P02792|FRIL_HUMAN Ferritin light chain OS=Homo sapiens OX=9606 GN=FTL PE=1 SV=2	1	8	8	8	8	7	7	5	5	7	8	7	7	5	5	7	8	7	7	5	5	7	50.9	50.9	50.9	20.019	175	175	0	58.523	By MS/MS	By MS/MS	By MS/MS	By MS/MS	By MS/MS	By MS/MS	50.9	46.9	46.9	27.4	27.4	40
P02794	P02794	7	7	7	Ferritin heavy chain;Ferritin heavy chain, N-terminally processed	FTH1	sp|P02794|FRIH_HUMAN Ferritin heavy chain OS=Homo sapiens OX=9606 GN=FTH1 PE=1 SV=2	1	7	7	7	7	7	7	7	7	7	7	7	7	7	7	7	7	7	7	7	7	7	47	47	47	21.225	183	183	0	31.064	By MS/MS	By MS/MS	By MS/MS	By MS/MS	By MS/MS	By MS/MS	47	47	47	47	47	47
P03950	P03950	1	1	1	Angiogenin	ANG	sp|P03950|ANGI_HUMAN Angiogenin OS=Homo sapiens OX=9606 GN=ANG PE=1 SV=1	1	1	1	1	1	1	1	0	1	1	1	1	1	0	1	1	1	1	1	0	1	1	6.1	6.1	6.1	16.55	147	147	0.0091556	1.4621	By matching	By matching	By matching		By MS/MS	By matching	6.1	6.1	6.1	0	6.1	6.1
P03951;P03952	P03951	3;1	3;1	3;1	Coagulation factor XI;Coagulation factor XIa heavy chain;Coagulation factor XIa light chain	F11	sp|P03951|FA11_HUMAN Coagulation factor XI OS=Homo sapiens OX=9606 GN=F11 PE=1 SV=1	2	3	3	3	0	0	0	1	1	3	0	0	0	1	1	3	0	0	0	1	1	3	5.8	5.8	5.8	70.108	625	625;638	0	6.9853				By MS/MS	By MS/MS	By MS/MS	0	0	0	1.1	1.1	5.8
P04004;CON__Q3ZBS7	P04004	9;1	9;1	9;1	Vitronectin;Vitronectin V65 subunit;Vitronectin V10 subunit;Somatomedin-B	VTN	sp|P04004|VTNC_HUMAN Vitronectin OS=Homo sapiens OX=9606 GN=VTN PE=1 SV=1	2	9	9	9	4	5	4	8	9	9	4	5	4	8	9	9	4	5	4	8	9	9	20.9	20.9	20.9	54.305	478	478;484	0	134.22	By MS/MS	By MS/MS	By MS/MS	By MS/MS	By MS/MS	By MS/MS	7.3	10.5	7.3	20.9	20.9	20.9
P04040	P04040	8	8	8	Catalase	CAT	sp|P04040|CATA_HUMAN Catalase OS=Homo sapiens OX=9606 GN=CAT PE=1 SV=3	1	8	8	8	8	7	6	6	5	6	8	7	6	6	5	6	8	7	6	6	5	6	19.7	19.7	19.7	59.755	527	527	0	25.867	By MS/MS	By MS/MS	By MS/MS	By MS/MS	By MS/MS	By MS/MS	19.7	18	15.6	15.6	13.7	16.5
P04062	P04062	3	3	3	Glucosylceramidase	GBA	sp|P04062|GBA1_HUMAN Lysosomal acid glucosylceramidase OS=Homo sapiens OX=9606 GN=GBA1 PE=1 SV=3	1	3	3	3	2	2	3	2	3	1	2	2	3	2	3	1	2	2	3	2	3	1	7.3	7.3	7.3	59.716	536	536	0	9.5277	By MS/MS	By MS/MS	By MS/MS	By MS/MS	By MS/MS	By matching	5.8	5.8	7.3	5.8	7.3	1.7
P04066	P04066	6	6	6	Tissue alpha-L-fucosidase	FUCA1	sp|P04066|FUCO_HUMAN Tissue alpha-L-fucosidase OS=Homo sapiens OX=9606 GN=FUCA1 PE=1 SV=4	1	6	6	6	5	6	6	5	5	5	5	6	6	5	5	5	5	6	6	5	5	5	10.1	10.1	10.1	53.688	466	466	0	14.757	By MS/MS	By MS/MS	By MS/MS	By MS/MS	By MS/MS	By MS/MS	8.6	10.1	10.1	10.1	8.4	8.6
P04075	P04075	23	23	18	Fructose-bisphosphate aldolase A	ALDOA	sp|P04075|ALDOA_HUMAN Fructose-bisphosphate aldolase A OS=Homo sapiens OX=9606 GN=ALDOA PE=1 SV=2	1	23	23	18	19	19	20	22	21	19	19	19	20	22	21	19	14	15	16	17	16	15	75.8	75.8	62.4	39.42	364	364	0	209.26	By MS/MS	By MS/MS	By MS/MS	By MS/MS	By MS/MS	By MS/MS	58.2	64	70.6	67.6	72.5	64.3
P04080	P04080	7	7	7	Cystatin-B	CSTB	sp|P04080|CYTB_HUMAN Cystatin-B OS=Homo sapiens OX=9606 GN=CSTB PE=1 SV=2	1	7	7	7	7	7	7	7	7	7	7	7	7	7	7	7	7	7	7	7	7	7	83.7	83.7	83.7	11.139	98	98	0	82.956	By MS/MS	By MS/MS	By MS/MS	By MS/MS	By MS/MS	By MS/MS	83.7	83.7	83.7	83.7	83.7	83.7
P04083	P04083	23	23	23	Annexin A1	ANXA1	sp|P04083|ANXA1_HUMAN Annexin A1 OS=Homo sapiens OX=9606 GN=ANXA1 PE=1 SV=2	1	23	23	23	22	22	20	21	20	22	22	22	20	21	20	22	22	22	20	21	20	22	59	59	59	38.714	346	346	0	268.98	By MS/MS	By MS/MS	By MS/MS	By MS/MS	By MS/MS	By MS/MS	57.8	59	59	57.5	57.8	59
P04114;CON__ENSEMBL:ENSBTAP00000032840	P04114	64;1	64;1	64;1	Apolipoprotein B-100;Apolipoprotein B-48	APOB	sp|P04114|APOB_HUMAN Apolipoprotein B-100 OS=Homo sapiens OX=9606 GN=APOB PE=1 SV=2	2	64	64	64	3	2	2	56	57	58	3	2	2	56	57	58	3	2	2	56	57	58	17	17	17	515.6	4563	4563;825	0	257.07	By MS/MS	By MS/MS	By MS/MS	By MS/MS	By MS/MS	By MS/MS	0.7	0.4	0.4	14.9	15.3	15.4
P04156	P04156	3	3	3	Major prion protein	PRNP	sp|P04156|PRIO_HUMAN Major prion protein OS=Homo sapiens OX=9606 GN=PRNP PE=1 SV=1	1	3	3	3	3	2	2	2	3	3	3	2	2	2	3	3	3	2	2	2	3	3	11.5	11.5	11.5	27.661	253	253	0	12.392	By MS/MS	By MS/MS	By MS/MS	By MS/MS	By MS/MS	By MS/MS	11.5	7.9	7.9	7.9	11.5	11.5
P04179	P04179	2	2	2	Superoxide dismutase [Mn], mitochondrial	SOD2	sp|P04179|SODM_HUMAN Superoxide dismutase [Mn], mitochondrial OS=Homo sapiens OX=9606 GN=SOD2 PE=1 SV=3	1	2	2	2	2	1	2	1	2	2	2	1	2	1	2	2	2	1	2	1	2	2	9.5	9.5	9.5	24.75	222	222	0.0008507	4.0206	By MS/MS	By MS/MS	By MS/MS	By MS/MS	By matching	By matching	9.5	6.3	9.5	6.3	9.5	9.5
P04196	P04196	3	3	3	Histidine-rich glycoprotein	HRG	sp|P04196|HRG_HUMAN Histidine-rich glycoprotein OS=Homo sapiens OX=9606 GN=HRG PE=1 SV=1	1	3	3	3	1	1	1	2	3	3	1	1	1	2	3	3	1	1	1	2	3	3	7.2	7.2	7.2	59.578	525	525	0	6.1805	By matching	By matching	By MS/MS	By MS/MS	By MS/MS	By MS/MS	1.3	1.3	1.3	5.1	7.2	7.2
P04216	P04216	3	3	3	Thy-1 membrane glycoprotein	THY1	sp|P04216|THY1_HUMAN Thy-1 membrane glycoprotein OS=Homo sapiens OX=9606 GN=THY1 PE=1 SV=2	1	3	3	3	3	3	3	2	2	3	3	3	3	2	2	3	3	3	3	2	2	3	17.4	17.4	17.4	17.935	161	161	0	74.676	By MS/MS	By MS/MS	By MS/MS	By MS/MS	By MS/MS	By MS/MS	17.4	17.4	17.4	14.9	14.9	17.4
P04217	P04217	8	8	8	Alpha-1B-glycoprotein	A1BG	sp|P04217|A1BG_HUMAN Alpha-1B-glycoprotein OS=Homo sapiens OX=9606 GN=A1BG PE=1 SV=4	1	8	8	8	4	5	5	8	8	7	4	5	5	8	8	7	4	5	5	8	8	7	28.3	28.3	28.3	54.253	495	495	0	38.516	By MS/MS	By MS/MS	By MS/MS	By MS/MS	By MS/MS	By MS/MS	11.1	15.2	12.9	28.3	28.3	26.1
P04233	P04233	2	2	2	HLA class II histocompatibility antigen gamma chain	CD74	sp|P04233|HG2A_HUMAN HLA class II histocompatibility antigen gamma chain OS=Homo sapiens OX=9606 GN=CD74 PE=1 SV=3	1	2	2	2	2	2	2	1	1	1	2	2	2	1	1	1	2	2	2	1	1	1	9.5	9.5	9.5	33.515	296	296	0	64.544	By MS/MS	By MS/MS	By MS/MS	By MS/MS	By MS/MS	By matching	9.5	9.5	9.5	4.7	4.7	4.7
P04259	P04259	37	1	1	Keratin, type II cytoskeletal 6B	KRT6B	sp|P04259|K2C6B_HUMAN Keratin, type II cytoskeletal 6B OS=Homo sapiens OX=9606 GN=KRT6B PE=1 SV=5	1	37	1	1	24	22	24	35	37	34	0	0	0	1	1	1	0	0	0	1	1	1	48.8	2.8	2.8	60.066	564	564	0	5.9649	By matching	By matching	By matching	By MS/MS	By MS/MS	By matching	36.3	34	36.9	48.4	48.8	47
P04264	P04264	40	40	1	Keratin, type II cytoskeletal 1	KRT1	sp|P04264|K2C1_HUMAN Keratin, type II cytoskeletal 1 OS=Homo sapiens OX=9606 GN=KRT1 PE=1 SV=6	1	40	40	1	37	37	36	38	38	38	37	37	36	38	38	38	0	1	0	1	1	1	44.7	44.7	1.4	66.038	644	644	0	323.31	By MS/MS	By MS/MS	By MS/MS	By MS/MS	By MS/MS	By MS/MS	39.3	38.8	38.7	40.7	44.7	40.7
P04279	P04279	15	13	13	Semenogelin-1;Alpha-inhibin-92;Alpha-inhibin-31;Seminal basic protein	SEMG1	sp|P04279|SEMG1_HUMAN Semenogelin-1 OS=Homo sapiens OX=9606 GN=SEMG1 PE=1 SV=2	1	15	13	13	8	9	10	14	14	14	6	7	8	12	12	12	6	7	8	12	12	12	38.5	31.4	31.4	52.13	462	462	0	277.02	By MS/MS	By MS/MS	By MS/MS	By MS/MS	By MS/MS	By MS/MS	27.5	30.1	30.1	36.8	36.6	36.6
P04406;O14556	P04406	15;1	15;1	15;1	Glyceraldehyde-3-phosphate dehydrogenase	GAPDH	sp|P04406|G3P_HUMAN Glyceraldehyde-3-phosphate dehydrogenase OS=Homo sapiens OX=9606 GN=GAPDH PE=1 SV=3	2	15	15	15	13	14	15	14	15	14	13	14	15	14	15	14	13	14	15	14	15	14	50.7	50.7	50.7	36.053	335	335;408	0	136.79	By MS/MS	By MS/MS	By MS/MS	By MS/MS	By MS/MS	By MS/MS	42.1	44.5	50.7	48.4	50.7	48.4
P04424	P04424	10	10	10	Argininosuccinate lyase	ASL	sp|P04424|ARLY_HUMAN Argininosuccinate lyase OS=Homo sapiens OX=9606 GN=ASL PE=1 SV=4	1	10	10	10	9	8	10	7	9	8	9	8	10	7	9	8	9	8	10	7	9	8	21.6	21.6	21.6	51.657	464	464	0	25.132	By MS/MS	By MS/MS	By MS/MS	By MS/MS	By MS/MS	By MS/MS	19.6	17.5	21.6	15.1	19.6	17.2
P04430	P04430	1	1	1	Ig kappa chain V-I region BAN		sp|P04430|KV116_HUMAN Immunoglobulin kappa variable 1-16 OS=Homo sapiens OX=9606 GN=IGKV1-16 PE=1 SV=2	1	1	1	1	1	1	1	0	0	0	1	1	1	0	0	0	1	1	1	0	0	0	13.7	13.7	13.7	12.618	117	117	0.0028891	2.0369	By matching	By matching	By MS/MS				13.7	13.7	13.7	0	0	0
P04439	P04439	12	12	8	HLA class I histocompatibility antigen, A-3 alpha chain	HLA-A	sp|P04439|HLAA_HUMAN HLA class I histocompatibility antigen, A alpha chain OS=Homo sapiens OX=9606 GN=HLA-A PE=1 SV=2	1	12	12	8	9	9	11	9	11	11	9	9	11	9	11	11	5	5	7	5	7	7	37.8	37.8	20.8	40.84	365	365	0	107.7	By MS/MS	By MS/MS	By MS/MS	By MS/MS	By MS/MS	By MS/MS	34	36.7	36.7	34	34	37.8
P04440	P04440	3	2	2	HLA class II histocompatibility antigen, DP beta 1 chain	HLA-DPB1	sp|P04440|DPB1_HUMAN HLA class II histocompatibility antigen, DP beta 1 chain OS=Homo sapiens OX=9606 GN=HLA-DPB1 PE=1 SV=1	1	3	2	2	3	3	2	2	1	1	2	2	1	1	0	0	2	2	1	1	0	0	10.5	7	7	29.159	258	258	0.00079745	3.1304	By MS/MS	By MS/MS	By MS/MS	By matching	By matching	By matching	10.5	10.5	7.8	6.2	3.5	3.5
P04632;Q96L46	P04632	3;1	3;1	3;1	Calpain small subunit 1	CAPNS1	sp|P04632|CPNS1_HUMAN Calpain small subunit 1 OS=Homo sapiens OX=9606 GN=CAPNS1 PE=1 SV=1	2	3	3	3	3	3	3	3	3	3	3	3	3	3	3	3	3	3	3	3	3	3	13.1	13.1	13.1	28.315	268	268;248	0	59.314	By MS/MS	By MS/MS	By MS/MS	By MS/MS	By MS/MS	By MS/MS	13.1	13.1	13.1	13.1	13.1	13.1
P04733;Q93083;P07438	P04733;Q93083;P07438	2;1;1	1;0;0	1;0;0	Metallothionein-1F;Metallothionein-1L;Metallothionein-1B	MT1F;MT1L;MT1B	sp|P04733|MT1F_HUMAN Metallothionein-1F OS=Homo sapiens OX=9606 GN=MT1F PE=1 SV=1;sp|Q93083|MT1L_HUMAN Metallothionein-1L OS=Homo sapiens OX=9606 GN=MT1L PE=2 SV=1;sp|P07438|MT1B_HUMAN Metallothionein-1B OS=Homo sapiens OX=9606 GN=MT1B PE=1 SV=1	3	2	1	1	2	2	2	2	2	2	1	1	1	1	1	1	1	1	1	1	1	1	32.8	19.7	19.7	6.0863	61	61;61;61	0	13.23	By MS/MS	By MS/MS	By MS/MS	By matching	By MS/MS	By matching	32.8	32.8	32.8	32.8	32.8	32.8
P04746;P19961;CON__Q3MHH8	P04746;P19961	7;6;1	7;6;1	1;0;0	Pancreatic alpha-amylase;Alpha-amylase 2B	AMY2A;AMY2B	sp|P04746|AMYP_HUMAN Pancreatic alpha-amylase OS=Homo sapiens OX=9606 GN=AMY2A PE=1 SV=2;sp|P19961|AMY2B_HUMAN Alpha-amylase 2B OS=Homo sapiens OX=9606 GN=AMY2B PE=1 SV=1	3	7	7	1	3	3	4	5	5	5	3	3	4	5	5	5	1	1	1	1	1	1	17.6	17.6	2.2	57.706	511	511;511;511	0	14.149	By MS/MS	By MS/MS	By MS/MS	By MS/MS	By MS/MS	By MS/MS	9	9	10.8	12.3	12.3	12.3
P04792	P04792	13	13	13	Heat shock protein beta-1	HSPB1	sp|P04792|HSPB1_HUMAN Heat shock protein beta-1 OS=Homo sapiens OX=9606 GN=HSPB1 PE=1 SV=2	1	13	13	13	13	13	13	13	13	13	13	13	13	13	13	13	13	13	13	13	13	13	61	61	61	22.782	205	205	0	199.36	By MS/MS	By MS/MS	By MS/MS	By MS/MS	By MS/MS	By MS/MS	61	61	61	61	61	61
P04839	P04839	6	6	6	Cytochrome b-245 heavy chain	CYBB	sp|P04839|CY24B_HUMAN Cytochrome b-245 heavy chain OS=Homo sapiens OX=9606 GN=CYBB PE=1 SV=2	1	6	6	6	6	6	6	3	2	2	6	6	6	3	2	2	6	6	6	3	2	2	10.9	10.9	10.9	65.335	570	570	0	24.581	By MS/MS	By MS/MS	By MS/MS	By MS/MS	By MS/MS	By MS/MS	10.9	10.9	10.9	4.9	2.8	3.5
P04899;P19087;P11488;A8MTJ3	P04899	19;3;2;2	19;3;2;2	11;0;0;0	Guanine nucleotide-binding protein G(i) subunit alpha-2	GNAI2	sp|P04899|GNAI2_HUMAN Guanine nucleotide-binding protein G(i) subunit alpha-2 OS=Homo sapiens OX=9606 GN=GNAI2 PE=1 SV=3	4	19	19	11	19	17	19	17	18	18	19	17	19	17	18	18	11	10	11	10	11	11	57.2	57.2	33.8	40.45	355	355;354;350;354	0	314.07	By MS/MS	By MS/MS	By MS/MS	By MS/MS	By MS/MS	By MS/MS	57.2	53.5	57.2	51.3	53	53
Q99878;Q96KK5;Q9BTM1;Q16777;Q93077;Q7L7L0;Q6FI13;P20671;P0C0S8;P04908;Q96QV6;P16104;Q71UI9;P0C0S5;Q8IUE6	Q99878;Q96KK5;Q9BTM1;Q16777;Q93077;Q7L7L0;Q6FI13;P20671;P0C0S8;P04908;Q96QV6;P16104;Q71UI9;P0C0S5;Q8IUE6	2;2;2;2;2;2;2;2;2;2;2;2;1;1;1	2;2;2;2;2;2;2;2;2;2;2;2;1;1;1	2;2;2;2;2;2;2;2;2;2;2;2;1;1;1	Histone H2A type 1-J;Histone H2A type 1-H;Histone H2A.J;Histone H2A type 2-C;Histone H2A type 1-C;Histone H2A type 3;Histone H2A type 2-A;Histone H2A type 1-D;Histone H2A type 1;Histone H2A type 1-B/E;Histone H2A type 1-A;Histone H2AX;Histone H2A.V;Histone H2A.Z;Histone H2A type 2-B	HIST1H2AJ;HIST1H2AH;H2AFJ;HIST2H2AC;HIST1H2AC;HIST3H2A;HIST2H2AA3;HIST1H2AD;HIST1H2AG;HIST1H2AB;HIST1H2AA;H2AFX;H2AFV;H2AFZ;HIST2H2AB	sp|Q99878|H2A1J_HUMAN Histone H2A type 1-J OS=Homo sapiens OX=9606 GN=H2AC14 PE=1 SV=3;sp|Q96KK5|H2A1H_HUMAN Histone H2A type 1-H OS=Homo sapiens OX=9606 GN=H2AC12 PE=1 SV=3;sp|Q9BTM1|H2AJ_HUMAN Histone H2A.J OS=Homo sapiens OX=9606 GN=H2AJ PE=1 SV=1;sp|Q1	15	2	2	2	2	2	2	2	2	2	2	2	2	2	2	2	2	2	2	2	2	2	18	18	18	13.936	128	128;128;129;129;130;130;130;130;130;130;131;143;128;128;130	0	6.442	By MS/MS	By MS/MS	By MS/MS	By MS/MS	By MS/MS	By MS/MS	18	18	18	18	18	18
P05023;P20648	P05023	38;4	38;4	22;0	Sodium/potassium-transporting ATPase subunit alpha-1	ATP1A1	sp|P05023|AT1A1_HUMAN Sodium/potassium-transporting ATPase subunit alpha-1 OS=Homo sapiens OX=9606 GN=ATP1A1 PE=1 SV=1	2	38	38	22	36	36	36	37	35	38	36	36	36	37	35	38	21	20	21	21	21	22	39.5	39.5	22.5	112.89	1023	1023;1035	0	323.31	By MS/MS	By MS/MS	By MS/MS	By MS/MS	By MS/MS	By MS/MS	38.7	37.9	37.9	37.9	36.3	39.5
P05026	P05026	8	8	8	Sodium/potassium-transporting ATPase subunit beta-1	ATP1B1	sp|P05026|AT1B1_HUMAN Sodium/potassium-transporting ATPase subunit beta-1 OS=Homo sapiens OX=9606 GN=ATP1B1 PE=1 SV=1	1	8	8	8	8	8	8	8	8	8	8	8	8	8	8	8	8	8	8	8	8	8	29.7	29.7	29.7	35.061	303	303	0	68.658	By MS/MS	By MS/MS	By MS/MS	By MS/MS	By MS/MS	By MS/MS	29.7	29.7	29.7	29.7	29.7	29.7
P05062	P05062	19	18	18	Fructose-bisphosphate aldolase B	ALDOB	sp|P05062|ALDOB_HUMAN Fructose-bisphosphate aldolase B OS=Homo sapiens OX=9606 GN=ALDOB PE=1 SV=2	1	19	18	18	19	19	18	19	18	18	18	18	17	18	17	17	18	18	17	18	17	17	64.8	62.9	62.9	39.473	364	364	0	301.57	By MS/MS	By MS/MS	By MS/MS	By MS/MS	By MS/MS	By MS/MS	64.8	64.8	64.6	64.8	58.2	64.6
P05067	P05067	4	4	4	Amyloid beta A4 protein;N-APP;Soluble APP-alpha;Soluble APP-beta;C99;Beta-amyloid protein 42;Beta-amyloid protein 40;C83;P3(42);P3(40);C80;Gamma-secretase C-terminal fragment 59;Gamma-secretase C-terminal fragment 57;Gamma-secretase C-terminal fragment 50;C31	APP	sp|P05067|A4_HUMAN Amyloid-beta precursor protein OS=Homo sapiens OX=9606 GN=APP PE=1 SV=3	1	4	4	4	0	1	1	3	4	4	0	1	1	3	4	4	0	1	1	3	4	4	7	7	7	86.942	770	770	0	12.603		By matching	By matching	By MS/MS	By MS/MS	By MS/MS	0	1.7	1.7	4.3	7	7
P05090	P05090	8	8	8	Apolipoprotein D	APOD	sp|P05090|APOD_HUMAN Apolipoprotein D OS=Homo sapiens OX=9606 GN=APOD PE=1 SV=1	1	8	8	8	8	8	8	8	8	8	8	8	8	8	8	8	8	8	8	8	8	8	34.9	34.9	34.9	21.275	189	189	0	136.1	By MS/MS	By MS/MS	By MS/MS	By MS/MS	By MS/MS	By MS/MS	34.9	34.9	34.9	34.9	34.9	34.9
P05106	P05106	20	20	20	Integrin beta-3	ITGB3	sp|P05106|ITB3_HUMAN Integrin beta-3 OS=Homo sapiens OX=9606 GN=ITGB3 PE=1 SV=2	1	20	20	20	16	16	17	17	18	18	16	16	17	17	18	18	16	16	17	17	18	18	31.9	31.9	31.9	87.057	788	788	0	139.07	By MS/MS	By MS/MS	By MS/MS	By MS/MS	By MS/MS	By MS/MS	26.4	27.7	27.8	27.8	29.9	28.7
P05107	P05107	8	8	8	Integrin beta-2	ITGB2	sp|P05107|ITB2_HUMAN Integrin beta-2 OS=Homo sapiens OX=9606 GN=ITGB2 PE=1 SV=2	1	8	8	8	7	6	5	3	3	4	7	6	5	3	3	4	7	6	5	3	3	4	10.9	10.9	10.9	84.781	769	769	0	35.601	By MS/MS	By MS/MS	By MS/MS	By MS/MS	By MS/MS	By MS/MS	10	8.3	6.8	4.8	3	4.6
P05109	P05109	8	8	8	Protein S100-A8;Protein S100-A8, N-terminally processed	S100A8	sp|P05109|S10A8_HUMAN Protein S100-A8 OS=Homo sapiens OX=9606 GN=S100A8 PE=1 SV=1	1	8	8	8	8	8	8	6	8	6	8	8	8	6	8	6	8	8	8	6	8	6	60.2	60.2	60.2	10.834	93	93	0	32.3	By MS/MS	By MS/MS	By MS/MS	By MS/MS	By MS/MS	By MS/MS	60.2	60.2	60.2	48.4	60.2	60.2
P05141;P12236;P12235;Q9H0C2	P05141;P12236;P12235	4;2;2;1	4;2;2;1	4;2;2;1	ADP/ATP translocase 2;ADP/ATP translocase 2, N-terminally processed;ADP/ATP translocase 3;ADP/ATP translocase 3, N-terminally processed;ADP/ATP translocase 1	SLC25A5;SLC25A6;SLC25A4	sp|P05141|ADT2_HUMAN ADP/ATP translocase 2 OS=Homo sapiens OX=9606 GN=SLC25A5 PE=1 SV=7;sp|P12236|ADT3_HUMAN ADP/ATP translocase 3 OS=Homo sapiens OX=9606 GN=SLC25A6 PE=1 SV=4;sp|P12235|ADT1_HUMAN ADP/ATP translocase 1 OS=Homo sapiens OX=9606 GN=SLC25A4 PE	4	4	4	4	4	4	3	2	2	2	4	4	3	2	2	2	4	4	3	2	2	2	15.4	15.4	15.4	32.852	298	298;298;298;315	0	5.5436	By MS/MS	By MS/MS	By MS/MS	By MS/MS	By MS/MS	By MS/MS	15.4	15.4	12.8	7.7	7.7	7.7
P05154	P05154	12	12	12	Plasma serine protease inhibitor	SERPINA5	sp|P05154|IPSP_HUMAN Plasma serine protease inhibitor OS=Homo sapiens OX=9606 GN=SERPINA5 PE=1 SV=3	1	12	12	12	12	11	12	11	11	12	12	11	12	11	11	12	12	11	12	11	11	12	32.8	32.8	32.8	45.674	406	406	0	99.952	By MS/MS	By MS/MS	By MS/MS	By MS/MS	By MS/MS	By MS/MS	32.8	29.8	32.8	29.6	32.8	32.8
P05155;CON__P50448	P05155	10;2	10;2	10;2	Plasma protease C1 inhibitor	SERPING1	sp|P05155|IC1_HUMAN Plasma protease C1 inhibitor OS=Homo sapiens OX=9606 GN=SERPING1 PE=1 SV=2	2	10	10	10	7	6	6	9	10	9	7	6	6	9	10	9	7	6	6	9	10	9	21.4	21.4	21.4	55.154	500	500;468	0	24.826	By MS/MS	By MS/MS	By MS/MS	By MS/MS	By MS/MS	By MS/MS	15.2	12.6	12.6	20	21.4	20
P05156	P05156	4	4	4	Complement factor I;Complement factor I heavy chain;Complement factor I light chain	CFI	sp|P05156|CFAI_HUMAN Complement factor I OS=Homo sapiens OX=9606 GN=CFI PE=1 SV=2	1	4	4	4	4	4	3	1	3	4	4	4	3	1	3	4	4	4	3	1	3	4	9.3	9.3	9.3	65.75	583	583	0	4.7852	By MS/MS	By MS/MS	By MS/MS	By MS/MS	By MS/MS	By MS/MS	9.3	9.3	7.5	1.5	7.5	9.3
P05161	P05161	3	3	3	Ubiquitin-like protein ISG15	ISG15	sp|P05161|ISG15_HUMAN Ubiquitin-like protein ISG15 OS=Homo sapiens OX=9606 GN=ISG15 PE=1 SV=5	1	3	3	3	2	3	3	3	3	3	2	3	3	3	3	3	2	3	3	3	3	3	15.8	15.8	15.8	17.887	165	165	0.00082645	3.6457	By MS/MS	By MS/MS	By MS/MS	By MS/MS	By MS/MS	By MS/MS	9.7	15.8	15.8	15.8	15.8	15.8
P05162	P05162	3	3	3	Galectin-2	LGALS2	sp|P05162|LEG2_HUMAN Galectin-2 OS=Homo sapiens OX=9606 GN=LGALS2 PE=1 SV=3	1	3	3	3	3	2	3	1	1	1	3	2	3	1	1	1	3	2	3	1	1	1	22.7	22.7	22.7	14.644	132	132	0	4.9687	By MS/MS	By MS/MS	By MS/MS	By MS/MS	By matching	By matching	22.7	13.6	22.7	6.8	6.8	6.8
P05164	P05164	10	10	8	Myeloperoxidase;Myeloperoxidase;89 kDa myeloperoxidase;84 kDa myeloperoxidase;Myeloperoxidase light chain;Myeloperoxidase heavy chain	MPO	sp|P05164|PERM_HUMAN Myeloperoxidase OS=Homo sapiens OX=9606 GN=MPO PE=1 SV=1	1	10	10	8	10	7	10	5	5	5	10	7	10	5	5	5	8	7	8	5	4	4	16.8	16.8	14.4	83.868	745	745	0	54.651	By MS/MS	By MS/MS	By MS/MS	By MS/MS	By MS/MS	By MS/MS	16.8	12.8	16.8	8.5	9	7.9
P05186;REV__Q86WI3	P05186	16;1	16;1	16;1	Alkaline phosphatase, tissue-nonspecific isozyme	ALPL	sp|P05186|PPBT_HUMAN Alkaline phosphatase, tissue-nonspecific isozyme OS=Homo sapiens OX=9606 GN=ALPL PE=1 SV=4	2	16	16	16	15	14	13	14	15	15	15	14	13	14	15	15	15	14	13	14	15	15	32.4	32.4	32.4	57.304	524	524;1866	0	70.838	By MS/MS	By MS/MS	By MS/MS	By MS/MS	By MS/MS	By MS/MS	32.3	32.3	30.7	28.4	32.3	32.4
P05198	P05198	4	4	4	Eukaryotic translation initiation factor 2 subunit 1	EIF2S1	sp|P05198|IF2A_HUMAN Eukaryotic translation initiation factor 2 subunit 1 OS=Homo sapiens OX=9606 GN=EIF2S1 PE=1 SV=3	1	4	4	4	3	4	4	2	3	4	3	4	4	2	3	4	3	4	4	2	3	4	13	13	13	36.112	315	315	0	8.9465	By MS/MS	By MS/MS	By MS/MS	By MS/MS	By MS/MS	By MS/MS	9.8	13	13	7.3	8.9	13
P05230	P05230	2	2	2	Fibroblast growth factor 1	FGF1	sp|P05230|FGF1_HUMAN Fibroblast growth factor 1 OS=Homo sapiens OX=9606 GN=FGF1 PE=1 SV=1	1	2	2	2	1	1	1	2	2	2	1	1	1	2	2	2	1	1	1	2	2	2	16.8	16.8	16.8	17.459	155	155	0	4.4885	By matching	By MS/MS	By MS/MS	By MS/MS	By MS/MS	By MS/MS	7.7	7.7	7.7	16.8	16.8	16.8
P05362	P05362	4	4	4	Intercellular adhesion molecule 1	ICAM1	sp|P05362|ICAM1_HUMAN Intercellular adhesion molecule 1 OS=Homo sapiens OX=9606 GN=ICAM1 PE=1 SV=2	1	4	4	4	4	4	4	4	3	4	4	4	4	4	3	4	4	4	4	4	3	4	11.3	11.3	11.3	57.825	532	532	0	11.205	By MS/MS	By MS/MS	By MS/MS	By MS/MS	By MS/MS	By MS/MS	11.3	11.3	11.3	11.3	8.3	11.3
P05387	P05387	2	2	2	60S acidic ribosomal protein P2	RPLP2	sp|P05387|RLA2_HUMAN 60S acidic ribosomal protein P2 OS=Homo sapiens OX=9606 GN=RPLP2 PE=1 SV=1	1	2	2	2	2	2	2	2	2	2	2	2	2	2	2	2	2	2	2	2	2	2	24.3	24.3	24.3	11.665	115	115	0	13.219	By MS/MS	By MS/MS	By MS/MS	By MS/MS	By MS/MS	By MS/MS	24.3	24.3	24.3	24.3	24.3	24.3
P05413;P02689	P05413	7;1	7;1	7;1	Fatty acid-binding protein, heart	FABP3	sp|P05413|FABPH_HUMAN Fatty acid-binding protein, heart OS=Homo sapiens OX=9606 GN=FABP3 PE=1 SV=4	2	7	7	7	7	7	7	6	7	7	7	7	7	6	7	7	7	7	7	6	7	7	50.4	50.4	50.4	14.858	133	133;132	0	38.449	By MS/MS	By MS/MS	By MS/MS	By MS/MS	By MS/MS	By MS/MS	50.4	50.4	50.4	42.9	50.4	50.4
P05543;CON__Q9TT36	P05543	8;2	8;2	8;2	Thyroxine-binding globulin	SERPINA7	sp|P05543|THBG_HUMAN Thyroxine-binding globulin OS=Homo sapiens OX=9606 GN=SERPINA7 PE=1 SV=2	2	8	8	8	5	7	7	8	8	8	5	7	7	8	8	8	5	7	7	8	8	8	23.1	23.1	23.1	46.324	415	415;411	0	43.71	By MS/MS	By MS/MS	By MS/MS	By MS/MS	By MS/MS	By MS/MS	15.9	21.4	21.4	23.1	23.1	23.1
P05546	P05546	4	4	4	Heparin cofactor 2	SERPIND1	sp|P05546|HEP2_HUMAN Heparin cofactor 2 OS=Homo sapiens OX=9606 GN=SERPIND1 PE=1 SV=3	1	4	4	4	1	0	0	4	3	4	1	0	0	4	3	4	1	0	0	4	3	4	8.6	8.6	8.6	57.07	499	499	0	31.433	By MS/MS			By MS/MS	By MS/MS	By MS/MS	1.8	0	0	8.6	6.8	8.6
P05556	P05556	22	22	22	Integrin beta-1	ITGB1	sp|P05556|ITB1_HUMAN Integrin beta-1 OS=Homo sapiens OX=9606 GN=ITGB1 PE=1 SV=2	1	22	22	22	19	18	19	19	22	20	19	18	19	19	22	20	19	18	19	19	22	20	29.9	29.9	29.9	88.414	798	798	0	168.85	By MS/MS	By MS/MS	By MS/MS	By MS/MS	By MS/MS	By MS/MS	27.3	23.6	26.2	26.6	29.9	26.3
P05783;CON__H-INV:HIT000015463	P05783	16;3	15;3	8;1	Keratin, type I cytoskeletal 18	KRT18	sp|P05783|K1C18_HUMAN Keratin, type I cytoskeletal 18 OS=Homo sapiens OX=9606 GN=KRT18 PE=1 SV=2	2	16	15	8	12	13	14	13	14	15	11	12	13	12	13	14	6	6	7	6	8	7	37.9	36.3	25.8	48.057	430	430;295	0	86.152	By MS/MS	By MS/MS	By MS/MS	By MS/MS	By MS/MS	By MS/MS	27.2	28.6	31.6	34.7	34.7	37.9
P05937;P22676	P05937	18;1	18;1	18;1	Calbindin	CALB1	sp|P05937|CALB1_HUMAN Calbindin OS=Homo sapiens OX=9606 GN=CALB1 PE=1 SV=2	2	18	18	18	18	18	18	18	18	18	18	18	18	18	18	18	18	18	18	18	18	18	51.7	51.7	51.7	30.025	261	261;271	0	323.31	By MS/MS	By MS/MS	By MS/MS	By MS/MS	By MS/MS	By MS/MS	51.7	51.7	51.7	51.7	51.7	51.7
P05981	P05981	5	5	5	Serine protease hepsin;Serine protease hepsin non-catalytic chain;Serine protease hepsin catalytic chain	HPN	sp|P05981|HEPS_HUMAN Serine protease hepsin OS=Homo sapiens OX=9606 GN=HPN PE=1 SV=1	1	5	5	5	5	5	4	5	5	5	5	5	4	5	5	5	5	5	4	5	5	5	17	17	17	45.011	417	417	0	57.201	By MS/MS	By MS/MS	By MS/MS	By MS/MS	By MS/MS	By MS/MS	17	17	11.3	17	17	17
P06132	P06132	3	3	3	Uroporphyrinogen decarboxylase	UROD	sp|P06132|DCUP_HUMAN Uroporphyrinogen decarboxylase OS=Homo sapiens OX=9606 GN=UROD PE=1 SV=2	1	3	3	3	3	2	2	1	3	2	3	2	2	1	3	2	3	2	2	1	3	2	10.9	10.9	10.9	40.786	367	367	0	4.8839	By MS/MS	By matching	By MS/MS	By matching	By MS/MS	By MS/MS	10.9	8.2	8.2	4.4	10.9	8.2
P06213	P06213	4	3	3	Insulin receptor;Insulin receptor subunit alpha;Insulin receptor subunit beta	INSR	sp|P06213|INSR_HUMAN Insulin receptor OS=Homo sapiens OX=9606 GN=INSR PE=1 SV=4	1	4	3	3	3	1	1	4	2	1	2	0	0	3	1	1	2	0	0	3	1	1	2.9	2.3	2.3	156.33	1382	1382	0.00084567	3.8975	By MS/MS	By matching	By matching	By MS/MS	By matching	By MS/MS	2	0.6	0.6	2.9	1.2	0.7
P06239	P06239	5	5	5	Tyrosine-protein kinase Lck	LCK	sp|P06239|LCK_HUMAN Tyrosine-protein kinase Lck OS=Homo sapiens OX=9606 GN=LCK PE=1 SV=6	1	5	5	5	4	4	4	5	4	3	4	4	4	5	4	3	4	4	4	5	4	3	12.4	12.4	12.4	58	509	509	0	15.01	By MS/MS	By MS/MS	By MS/MS	By MS/MS	By MS/MS	By MS/MS	9.4	9.4	9.4	12.4	9.4	7.3
P06280	P06280	5	5	5	Alpha-galactosidase A	GLA	sp|P06280|AGAL_HUMAN Alpha-galactosidase A OS=Homo sapiens OX=9606 GN=GLA PE=1 SV=1	1	5	5	5	5	5	5	2	2	4	5	5	5	2	2	4	5	5	5	2	2	4	13.1	13.1	13.1	48.766	429	429	0	43.1	By MS/MS	By MS/MS	By MS/MS	By MS/MS	By MS/MS	By MS/MS	13.1	13.1	13.1	6.8	6.8	11.4
P06310	P06310	1	1	1	Ig kappa chain V-II region RPMI 6410		sp|P06310|KV230_HUMAN Immunoglobulin kappa variable 2-30 OS=Homo sapiens OX=9606 GN=IGKV2-30 PE=3 SV=2	1	1	1	1	1	1	1	1	1	1	1	1	1	1	1	1	1	1	1	1	1	1	16.7	16.7	16.7	13.185	120	120	0	6.1707	By MS/MS	By MS/MS	By MS/MS	By MS/MS	By MS/MS	By MS/MS	16.7	16.7	16.7	16.7	16.7	16.7
P06312	P06312	2	2	2	Ig kappa chain V-IV region	IGKV4-1	sp|P06312|KV401_HUMAN Immunoglobulin kappa variable 4-1 OS=Homo sapiens OX=9606 GN=IGKV4-1 PE=1 SV=1	1	2	2	2	2	2	1	2	1	2	2	2	1	2	1	2	2	2	1	2	1	2	17.4	17.4	17.4	13.38	121	121	0	16.639	By MS/MS	By MS/MS	By matching	By MS/MS	By MS/MS	By MS/MS	17.4	17.4	9.9	17.4	9.9	17.4
P06576	P06576	2	2	2	ATP synthase subunit beta, mitochondrial	ATP5B	sp|P06576|ATPB_HUMAN ATP synthase subunit beta, mitochondrial OS=Homo sapiens OX=9606 GN=ATP5F1B PE=1 SV=3	1	2	2	2	1	1	2	1	1	1	1	1	2	1	1	1	1	1	2	1	1	1	6.4	6.4	6.4	56.559	529	529	0	5.5188	By matching	By MS/MS	By MS/MS	By matching	By matching	By matching	2.8	2.8	6.4	2.8	2.8	2.8
P06702	P06702	5	5	5	Protein S100-A9	S100A9	sp|P06702|S10A9_HUMAN Protein S100-A9 OS=Homo sapiens OX=9606 GN=S100A9 PE=1 SV=1	1	5	5	5	5	5	5	5	5	5	5	5	5	5	5	5	5	5	5	5	5	5	50.9	50.9	50.9	13.242	114	114	0	64.838	By MS/MS	By MS/MS	By MS/MS	By MS/MS	By MS/MS	By MS/MS	50.9	50.9	50.9	50.9	50.9	50.9
P06703	P06703	6	6	6	Protein S100-A6	S100A6	sp|P06703|S10A6_HUMAN Protein S100-A6 OS=Homo sapiens OX=9606 GN=S100A6 PE=1 SV=1	1	6	6	6	5	6	5	5	6	5	5	6	5	5	6	5	5	6	5	5	6	5	35.6	35.6	35.6	10.18	90	90	0	14.951	By MS/MS	By MS/MS	By MS/MS	By MS/MS	By MS/MS	By MS/MS	26.7	35.6	26.7	26.7	35.6	35.6
P06727	P06727	22	22	20	Apolipoprotein A-IV	APOA4	sp|P06727|APOA4_HUMAN Apolipoprotein A-IV OS=Homo sapiens OX=9606 GN=APOA4 PE=1 SV=4	1	22	22	20	11	10	10	20	22	22	11	10	10	20	22	22	10	9	9	18	20	20	55.1	55.1	52	45.371	396	396	0	106.37	By MS/MS	By MS/MS	By MS/MS	By MS/MS	By MS/MS	By MS/MS	30.6	26.3	26.3	54.5	55.1	55.1
P06730	P06730	4	4	4	Eukaryotic translation initiation factor 4E	EIF4E	sp|P06730|IF4E_HUMAN Eukaryotic translation initiation factor 4E OS=Homo sapiens OX=9606 GN=EIF4E PE=1 SV=2	1	4	4	4	3	3	3	3	4	3	3	3	3	3	4	3	3	3	3	3	4	3	18.9	18.9	18.9	25.097	217	217	0.00083577	3.7343	By MS/MS	By MS/MS	By MS/MS	By MS/MS	By MS/MS	By MS/MS	12	12	12	12	18.9	12
P06731	P06731	5	5	4	Carcinoembryonic antigen-related cell adhesion molecule 5	CEACAM5	sp|P06731|CEAM5_HUMAN Carcinoembryonic antigen-related cell adhesion molecule 5 OS=Homo sapiens OX=9606 GN=CEACAM5 PE=1 SV=4	1	5	5	4	4	4	4	5	5	5	4	4	4	5	5	5	3	3	3	4	4	4	8.3	8.3	7	76.795	702	702	0	35.179	By MS/MS	By MS/MS	By MS/MS	By MS/MS	By MS/MS	By MS/MS	6.8	6.8	6.8	8.3	8.3	8.3
P06733;P13929	P06733	26;3	26;3	23;0	Alpha-enolase	ENO1	sp|P06733|ENOA_HUMAN Alpha-enolase OS=Homo sapiens OX=9606 GN=ENO1 PE=1 SV=2	2	26	26	23	23	26	23	22	23	25	23	26	23	22	23	25	20	23	21	20	21	23	62.2	62.2	53.7	47.168	434	434;434	0	323.31	By MS/MS	By MS/MS	By MS/MS	By MS/MS	By MS/MS	By MS/MS	55.8	62.2	52.3	50.7	52.3	57.1
P06737	P06737	4	4	4	Glycogen phosphorylase, liver form	PYGL	sp|P06737|PYGL_HUMAN Glycogen phosphorylase, liver form OS=Homo sapiens OX=9606 GN=PYGL PE=1 SV=4	1	4	4	4	3	3	3	3	4	4	3	3	3	3	4	4	3	3	3	3	4	4	8.3	8.3	8.3	97.147	847	847	0	11.214	By MS/MS	By MS/MS	By MS/MS	By MS/MS	By MS/MS	By MS/MS	6.1	6.5	6.1	6.5	8.3	8.3
P06744;Q8N196	P06744	15;1	15;1	12;1	Glucose-6-phosphate isomerase	GPI	sp|P06744|G6PI_HUMAN Glucose-6-phosphate isomerase OS=Homo sapiens OX=9606 GN=GPI PE=1 SV=4	2	15	15	12	15	15	14	15	13	15	15	15	14	15	13	15	12	12	11	12	10	12	28.5	28.5	21.7	63.146	558	558;739	0	155.82	By MS/MS	By MS/MS	By MS/MS	By MS/MS	By MS/MS	By MS/MS	28.5	28.5	27.6	28.5	25.6	28.5
P06756	P06756	26	26	26	Integrin alpha-V;Integrin alpha-V heavy chain;Integrin alpha-V light chain	ITGAV	sp|P06756|ITAV_HUMAN Integrin alpha-V OS=Homo sapiens OX=9606 GN=ITGAV PE=1 SV=2	1	26	26	26	20	21	23	25	24	23	20	21	23	25	24	23	20	21	23	25	24	23	27.1	27.1	27.1	116.04	1048	1048	0	323.31	By MS/MS	By MS/MS	By MS/MS	By MS/MS	By MS/MS	By MS/MS	22.9	24.2	25.3	26	25.4	25.4
P06865	P06865	7	7	7	Beta-hexosaminidase subunit alpha	HEXA	sp|P06865|HEXA_HUMAN Beta-hexosaminidase subunit alpha OS=Homo sapiens OX=9606 GN=HEXA PE=1 SV=2	1	7	7	7	6	7	7	2	4	3	6	7	7	2	4	3	6	7	7	2	4	3	14.6	14.6	14.6	60.702	529	529	0	67.934	By MS/MS	By MS/MS	By MS/MS	By matching	By MS/MS	By MS/MS	12.3	14.6	14.6	4.5	8.1	7.2
Q8N257;Q16778;P33778;P23527;P06899;Q6DRA6;Q6DN03	Q8N257;Q16778;P33778;P23527;P06899	5;5;5;5;5;1;1	1;1;1;1;1;1;1	1;1;1;1;1;1;1	Histone H2B type 3-B;Histone H2B type 2-E;Histone H2B type 1-B;Histone H2B type 1-O;Histone H2B type 1-J	HIST3H2BB;HIST2H2BE;HIST1H2BB;HIST1H2BO;HIST1H2BJ	sp|Q8N257|H2B3B_HUMAN Histone H2B type 3-B OS=Homo sapiens OX=9606 GN=H2BC26 PE=1 SV=3;sp|Q16778|H2B2E_HUMAN Histone H2B type 2-E OS=Homo sapiens OX=9606 GN=H2BC21 PE=1 SV=3;sp|P33778|H2B1B_HUMAN Histone H2B type 1-B OS=Homo sapiens OX=9606 GN=H2BC3 PE=1 S	7	5	1	1	5	5	4	4	5	5	1	1	1	1	1	1	1	1	1	1	1	1	41.3	7.1	7.1	13.908	126	126;126;126;126;126;164;193	1	-2	By matching	By MS/MS	By MS/MS	By MS/MS	By MS/MS	By MS/MS	41.3	41.3	29.4	29.4	41.3	41.3
P07093	P07093	1	1	1	Glia-derived nexin	SERPINE2	sp|P07093|GDN_HUMAN Glia-derived nexin OS=Homo sapiens OX=9606 GN=SERPINE2 PE=1 SV=1	1	1	1	1	1	1	1	0	0	0	1	1	1	0	0	0	1	1	1	0	0	0	3	3	3	44.002	398	398	0.0011538	2.6437	By MS/MS	By MS/MS	By MS/MS				3	3	3	0	0	0
P07099	P07099	2	2	2	Epoxide hydrolase 1	EPHX1	sp|P07099|HYEP_HUMAN Epoxide hydrolase 1 OS=Homo sapiens OX=9606 GN=EPHX1 PE=1 SV=1	1	2	2	2	2	2	1	0	0	0	2	2	1	0	0	0	2	2	1	0	0	0	5.5	5.5	5.5	52.948	455	455	0	4.3869	By MS/MS	By MS/MS	By MS/MS				5.5	5.5	2.4	0	0	0
P07108	P07108	5	5	5	Acyl-CoA-binding protein	DBI	sp|P07108|ACBP_HUMAN Acyl-CoA-binding protein OS=Homo sapiens OX=9606 GN=DBI PE=1 SV=2	1	5	5	5	5	5	5	5	5	5	5	5	5	5	5	5	5	5	5	5	5	5	60.9	60.9	60.9	10.044	87	87	0	104.31	By MS/MS	By MS/MS	By MS/MS	By MS/MS	By MS/MS	By MS/MS	60.9	60.9	60.9	60.9	60.9	60.9
P07148	P07148	6	6	6	Fatty acid-binding protein, liver	FABP1	sp|P07148|FABPL_HUMAN Fatty acid-binding protein, liver OS=Homo sapiens OX=9606 GN=FABP1 PE=1 SV=1	1	6	6	6	6	6	6	6	6	6	6	6	6	6	6	6	6	6	6	6	6	6	58.3	58.3	58.3	14.208	127	127	0	47.924	By MS/MS	By MS/MS	By MS/MS	By MS/MS	By MS/MS	By MS/MS	58.3	58.3	58.3	58.3	58.3	58.3
P07195	P07195	14	14	12	L-lactate dehydrogenase B chain	LDHB	sp|P07195|LDHB_HUMAN L-lactate dehydrogenase B chain OS=Homo sapiens OX=9606 GN=LDHB PE=1 SV=2	1	14	14	12	14	14	14	13	14	14	14	14	14	13	14	14	12	12	12	12	12	12	44.3	44.3	38.6	36.638	334	334	0	59.228	By MS/MS	By MS/MS	By MS/MS	By MS/MS	By MS/MS	By MS/MS	44.3	44.3	44.3	42.2	44.3	44.3
P07203	P07203	6	6	6	Glutathione peroxidase 1	GPX1	sp|P07203|GPX1_HUMAN Glutathione peroxidase 1 OS=Homo sapiens OX=9606 GN=GPX1 PE=1 SV=4	1	6	6	6	5	6	6	5	5	5	5	6	6	5	5	5	5	6	6	5	5	5	36.5	36.5	36.5	22.088	203	203	0	18.243	By MS/MS	By MS/MS	By MS/MS	By MS/MS	By MS/MS	By MS/MS	31.5	36.5	36.5	27.1	27.1	27.1
P07205	P07205	6	2	2	Phosphoglycerate kinase 2	PGK2	sp|P07205|PGK2_HUMAN Phosphoglycerate kinase 2 OS=Homo sapiens OX=9606 GN=PGK2 PE=1 SV=3	1	6	2	2	6	6	5	6	5	6	2	2	1	2	1	2	2	2	1	2	1	2	17.5	5.8	5.8	44.796	417	417	0.0065608	1.5965	By MS/MS	By MS/MS	By MS/MS	By MS/MS	By matching	By MS/MS	17.5	17.5	15.8	17.5	15.8	17.5
P07237	P07237	3	3	3	Protein disulfide-isomerase	P4HB	sp|P07237|PDIA1_HUMAN Protein disulfide-isomerase OS=Homo sapiens OX=9606 GN=P4HB PE=1 SV=3	1	3	3	3	2	1	3	2	2	2	2	1	3	2	2	2	2	1	3	2	2	2	5.9	5.9	5.9	57.116	508	508	0.00081037	3.3617	By MS/MS	By MS/MS	By MS/MS	By MS/MS	By MS/MS	By MS/MS	3.5	1.6	5.9	3.5	3.5	3.5
P07288	P07288	6	6	5	Prostate-specific antigen	KLK3	sp|P07288|KLK3_HUMAN Prostate-specific antigen OS=Homo sapiens OX=9606 GN=KLK3 PE=1 SV=2	1	6	6	5	5	5	5	6	6	6	5	5	5	6	6	6	4	4	4	5	5	5	21.8	21.8	18.4	28.741	261	261	0	26.026	By MS/MS	By MS/MS	By MS/MS	By MS/MS	By MS/MS	By MS/MS	19.2	19.2	19.2	21.8	21.8	21.8
P07305	P07305	1	1	1	Histone H1.0;Histone H1.0, N-terminally processed	H1F0	sp|P07305|H10_HUMAN Histone H1.0 OS=Homo sapiens OX=9606 GN=H1-0 PE=1 SV=3	1	1	1	1	0	1	0	0	1	1	0	1	0	0	1	1	0	1	0	0	1	1	6.7	6.7	6.7	20.863	194	194	0.0078258	1.4823		By MS/MS			By MS/MS	By MS/MS	0	6.7	0	0	6.7	6.7
P07339	P07339	13	13	13	Cathepsin D;Cathepsin D light chain;Cathepsin D heavy chain	CTSD	sp|P07339|CATD_HUMAN Cathepsin D OS=Homo sapiens OX=9606 GN=CTSD PE=1 SV=1	1	13	13	13	11	12	12	10	10	10	11	12	12	10	10	10	11	12	12	10	10	10	42.7	42.7	42.7	44.552	412	412	0	119.33	By MS/MS	By MS/MS	By MS/MS	By MS/MS	By MS/MS	By MS/MS	34.2	38.3	37.9	30.8	30.8	30.8
P07355;A6NMY6	P07355;A6NMY6	23;17	23;17	23;17	Annexin A2;Putative annexin A2-like protein	ANXA2;ANXA2P2	sp|P07355|ANXA2_HUMAN Annexin A2 OS=Homo sapiens OX=9606 GN=ANXA2 PE=1 SV=2;sp|A6NMY6|AXA2L_HUMAN Putative annexin A2-like protein OS=Homo sapiens OX=9606 GN=ANXA2P2 PE=5 SV=2	2	23	23	23	23	22	23	22	22	22	23	22	23	22	22	22	23	22	23	22	22	22	59.3	59.3	59.3	38.604	339	339;339	0	323.31	By MS/MS	By MS/MS	By MS/MS	By MS/MS	By MS/MS	By MS/MS	59.3	59.3	59.3	54.6	59.3	54.6
P07357	P07357	1	1	1	Complement component C8 alpha chain	C8A	sp|P07357|CO8A_HUMAN Complement component C8 alpha chain OS=Homo sapiens OX=9606 GN=C8A PE=1 SV=2	1	1	1	1	0	0	0	1	1	1	0	0	0	1	1	1	0	0	0	1	1	1	2.9	2.9	2.9	65.163	584	584	0	5.5118				By matching	By MS/MS	By MS/MS	0	0	0	2.9	2.9	2.9
P07358	P07358	5	5	5	Complement component C8 beta chain	C8B	sp|P07358|CO8B_HUMAN Complement component C8 beta chain OS=Homo sapiens OX=9606 GN=C8B PE=1 SV=3	1	5	5	5	0	0	0	5	5	5	0	0	0	5	5	5	0	0	0	5	5	5	8.5	8.5	8.5	67.046	591	591	0	21.637				By MS/MS	By MS/MS	By MS/MS	0	0	0	8.5	8.5	8.5
P07360	P07360	1	1	1	Complement component C8 gamma chain	C8G	sp|P07360|CO8G_HUMAN Complement component C8 gamma chain OS=Homo sapiens OX=9606 GN=C8G PE=1 SV=3	1	1	1	1	0	0	0	0	1	1	0	0	0	0	1	1	0	0	0	0	1	1	7.4	7.4	7.4	22.277	202	202	0.0084832	1.4679					By MS/MS	By MS/MS	0	0	0	0	7.4	7.4
P07384;O14815	P07384	15;1	15;1	14;0	Calpain-1 catalytic subunit	CAPN1	sp|P07384|CAN1_HUMAN Calpain-1 catalytic subunit OS=Homo sapiens OX=9606 GN=CAPN1 PE=1 SV=1	2	15	15	14	15	14	15	13	15	14	15	14	15	13	15	14	14	13	14	13	14	13	18.2	18.2	17.1	81.889	714	714;690	0	43.952	By MS/MS	By MS/MS	By MS/MS	By MS/MS	By MS/MS	By MS/MS	18.2	16.4	18.2	16	18.2	17.1
P07437;A6NNZ2;CON__ENSEMBL:ENSBTAP00000025008;Q9H4B7	P07437	13;4;2;2	3;0;0;0	2;0;0;0	Tubulin beta chain	TUBB	sp|P07437|TBB5_HUMAN Tubulin beta chain OS=Homo sapiens OX=9606 GN=TUBB PE=1 SV=2	4	13	3	2	12	12	12	13	13	13	3	3	3	3	3	3	2	2	2	2	2	2	38.1	9.5	6.1	49.67	444	444;444;536;451	0	25.613	By MS/MS	By MS/MS	By MS/MS	By MS/MS	By MS/MS	By MS/MS	32.4	32.4	32.4	38.1	38.1	38.1
P07476	P07476	3	3	3	Involucrin	IVL	sp|P07476|INVO_HUMAN Involucrin OS=Homo sapiens OX=9606 GN=IVL PE=1 SV=2	1	3	3	3	1	1	0	3	3	3	1	1	0	3	3	3	1	1	0	3	3	3	7.5	7.5	7.5	68.478	585	585	0	6.4793	By matching	By matching		By MS/MS	By MS/MS	By MS/MS	2.1	3.4	0	7.5	7.5	7.5
P07478	P07478	1	1	1	Trypsin-2	PRSS2	sp|P07478|TRY2_HUMAN Trypsin-2 OS=Homo sapiens OX=9606 GN=PRSS2 PE=1 SV=1	1	1	1	1	1	1	0	1	1	1	1	1	0	1	1	1	1	1	0	1	1	1	6.1	6.1	6.1	26.487	247	247	0.0011407	2.5458	By matching	By matching		By MS/MS	By MS/MS	By MS/MS	6.1	6.1	0	6.1	6.1	6.1
P07602	P07602	9	9	9	Prosaposin;Saposin-A;Saposin-B-Val;Saposin-B;Saposin-C;Saposin-D	PSAP	sp|P07602|SAP_HUMAN Prosaposin OS=Homo sapiens OX=9606 GN=PSAP PE=1 SV=2	1	9	9	9	9	9	9	9	9	9	9	9	9	9	9	9	9	9	9	9	9	9	15.8	15.8	15.8	58.112	524	524	0	44.357	By MS/MS	By MS/MS	By MS/MS	By MS/MS	By MS/MS	By MS/MS	15.8	15.8	15.8	15.8	15.8	15.8
P07686	P07686	16	16	16	Beta-hexosaminidase subunit beta;Beta-hexosaminidase subunit beta chain B;Beta-hexosaminidase subunit beta chain A	HEXB	sp|P07686|HEXB_HUMAN Beta-hexosaminidase subunit beta OS=Homo sapiens OX=9606 GN=HEXB PE=1 SV=4	1	16	16	16	16	16	16	11	13	15	16	16	16	11	13	15	16	16	16	11	13	15	27.9	27.9	27.9	63.137	556	556	0	83.403	By MS/MS	By MS/MS	By MS/MS	By MS/MS	By MS/MS	By MS/MS	27.9	27.9	27.9	22.5	25.4	25.9
P07711	P07711	2	2	2	Cathepsin L1;Cathepsin L1 heavy chain;Cathepsin L1 light chain	CTSL	sp|P07711|CATL1_HUMAN Procathepsin L OS=Homo sapiens OX=9606 GN=CTSL PE=1 SV=2	1	2	2	2	2	2	2	1	1	1	2	2	2	1	1	1	2	2	2	1	1	1	8.4	8.4	8.4	37.564	333	333	0	11.634	By MS/MS	By MS/MS	By MS/MS	By matching	By matching	By matching	8.4	8.4	8.4	4.2	4.2	4.2
P07737;CON__P02584	P07737	7;3	7;3	7;3	Profilin-1	PFN1	sp|P07737|PROF1_HUMAN Profilin-1 OS=Homo sapiens OX=9606 GN=PFN1 PE=1 SV=2	2	7	7	7	7	7	7	7	7	7	7	7	7	7	7	7	7	7	7	7	7	7	60	60	60	15.054	140	140;140	0	62.344	By MS/MS	By MS/MS	By MS/MS	By MS/MS	By MS/MS	By MS/MS	60	60	60	60	60	60
P07738	P07738	1	1	1	Bisphosphoglycerate mutase	BPGM	sp|P07738|PMGE_HUMAN Bisphosphoglycerate mutase OS=Homo sapiens OX=9606 GN=BPGM PE=1 SV=2	1	1	1	1	0	0	0	1	1	1	0	0	0	1	1	1	0	0	0	1	1	1	7.3	7.3	7.3	30.005	259	259	0.00079586	3.1088				By matching	By MS/MS	By MS/MS	0	0	0	7.3	7.3	7.3
P07741	P07741	4	4	4	Adenine phosphoribosyltransferase	APRT	sp|P07741|APT_HUMAN Adenine phosphoribosyltransferase OS=Homo sapiens OX=9606 GN=APRT PE=1 SV=2	1	4	4	4	2	2	2	3	3	2	2	2	2	3	3	2	2	2	2	3	3	2	18.9	18.9	18.9	19.608	180	180	0	26.416	By MS/MS	By MS/MS	By MS/MS	By MS/MS	By MS/MS	By MS/MS	10.6	10.6	10.6	14.4	15	10.6
P07814	P07814	2	2	2	Bifunctional glutamate/proline--tRNA ligase;Glutamate--tRNA ligase;Proline--tRNA ligase	EPRS	sp|P07814|SYEP_HUMAN Bifunctional glutamate/proline--tRNA ligase OS=Homo sapiens OX=9606 GN=EPRS1 PE=1 SV=5	1	2	2	2	2	2	2	2	2	2	2	2	2	2	2	2	2	2	2	2	2	2	2.3	2.3	2.3	170.59	1512	1512	0	5.2187	By MS/MS	By MS/MS	By MS/MS	By MS/MS	By MS/MS	By MS/MS	2.3	2.3	2.3	2.3	2.3	2.3
P07858	P07858	9	9	9	Cathepsin B;Cathepsin B light chain;Cathepsin B heavy chain	CTSB	sp|P07858|CATB_HUMAN Cathepsin B OS=Homo sapiens OX=9606 GN=CTSB PE=1 SV=3	1	9	9	9	9	9	9	6	6	6	9	9	9	6	6	6	9	9	9	6	6	6	31.3	31.3	31.3	37.821	339	339	0	119.4	By MS/MS	By MS/MS	By MS/MS	By MS/MS	By MS/MS	By MS/MS	31.3	31.3	31.3	23	23	23
P07900;Q58FF6;Q58FG0;Q58FG1	P07900	34;4;3;2	34;4;3;2	20;0;1;2	Heat shock protein HSP 90-alpha	HSP90AA1	sp|P07900|HS90A_HUMAN Heat shock protein HSP 90-alpha OS=Homo sapiens OX=9606 GN=HSP90AA1 PE=1 SV=5	4	34	34	20	33	33	32	34	33	33	33	33	32	34	33	33	19	20	20	20	20	19	51.4	51.4	34.8	84.659	732	732;505;334;418	0	323.31	By MS/MS	By MS/MS	By MS/MS	By MS/MS	By MS/MS	By MS/MS	51.1	51.4	50.1	51.4	51.4	51.4
P07902	P07902	1	1	1	Galactose-1-phosphate uridylyltransferase	GALT	sp|P07902|GALT_HUMAN Galactose-1-phosphate uridylyltransferase OS=Homo sapiens OX=9606 GN=GALT PE=1 SV=3	1	1	1	1	1	1	1	1	1	1	1	1	1	1	1	1	1	1	1	1	1	1	3.7	3.7	3.7	43.363	379	379	0	5.7409	By MS/MS	By MS/MS	By MS/MS	By MS/MS	By MS/MS	By MS/MS	3.7	3.7	3.7	3.7	3.7	3.7
P07911	P07911	23	23	23	Uromodulin;Uromodulin, secreted form	UMOD	sp|P07911|UROM_HUMAN Uromodulin OS=Homo sapiens OX=9606 GN=UMOD PE=1 SV=1	1	23	23	23	21	22	21	23	22	22	21	22	21	23	22	22	21	22	21	23	22	22	39.7	39.7	39.7	69.76	640	640	0	323.31	By MS/MS	By MS/MS	By MS/MS	By MS/MS	By MS/MS	By MS/MS	35.9	38.1	35.9	39.7	38.1	38.1
P07947	P07947	16	11	9	Tyrosine-protein kinase Yes	YES1	sp|P07947|YES_HUMAN Tyrosine-protein kinase Yes OS=Homo sapiens OX=9606 GN=YES1 PE=1 SV=3	1	16	11	9	14	14	12	14	15	15	9	9	7	9	10	10	8	8	6	8	9	9	25.8	17.9	14.4	60.801	543	543	0	18.742	By MS/MS	By MS/MS	By MS/MS	By MS/MS	By MS/MS	By MS/MS	23.2	23.2	19.9	23.8	23.8	23.8
P07948	P07948	11	10	9	Tyrosine-protein kinase Lyn	LYN	sp|P07948|LYN_HUMAN Tyrosine-protein kinase Lyn OS=Homo sapiens OX=9606 GN=LYN PE=1 SV=3	1	11	10	9	11	9	9	11	10	11	10	8	8	10	9	10	9	7	7	9	8	9	22.7	21.3	19.3	58.573	512	512	0	26.737	By MS/MS	By MS/MS	By MS/MS	By MS/MS	By MS/MS	By MS/MS	22.7	18.4	18.4	22.7	21.3	22.7
P07954	P07954	5	5	5	Fumarate hydratase, mitochondrial	FH	sp|P07954|FUMH_HUMAN Fumarate hydratase, mitochondrial OS=Homo sapiens OX=9606 GN=FH PE=1 SV=3	1	5	5	5	2	2	3	2	2	3	2	2	3	2	2	3	2	2	3	2	2	3	12.5	12.5	12.5	54.636	510	510	0	8.043	By MS/MS	By MS/MS	By MS/MS	By MS/MS	By MS/MS	By MS/MS	5.3	5.3	6.9	4.5	7.1	8.6
P07996;CON__Q28194	P07996	4;1	4;1	4;1	Thrombospondin-1	THBS1	sp|P07996|TSP1_HUMAN Thrombospondin-1 OS=Homo sapiens OX=9606 GN=THBS1 PE=1 SV=2	2	4	4	4	3	3	4	3	4	4	3	3	4	3	4	4	3	3	4	3	4	4	5.1	5.1	5.1	129.38	1170	1170;1170	0	44.597	By MS/MS	By MS/MS	By MS/MS	By matching	By MS/MS	By MS/MS	3.6	3.8	5.1	3.8	5.1	5.1
P07998	P07998	2	2	2	Ribonuclease pancreatic	RNASE1	sp|P07998|RNAS1_HUMAN Ribonuclease pancreatic OS=Homo sapiens OX=9606 GN=RNASE1 PE=1 SV=4	1	2	2	2	1	0	2	1	0	1	1	0	2	1	0	1	1	0	2	1	0	1	26.9	26.9	26.9	17.644	156	156	0	7.7918	By MS/MS		By MS/MS	By matching		By MS/MS	13.5	0	26.9	13.5	0	13.5
P08069;P14616	P08069	4;1	4;1	3;0	Insulin-like growth factor 1 receptor;Insulin-like growth factor 1 receptor alpha chain;Insulin-like growth factor 1 receptor beta chain	IGF1R	sp|P08069|IGF1R_HUMAN Insulin-like growth factor 1 receptor OS=Homo sapiens OX=9606 GN=IGF1R PE=1 SV=1	2	4	4	3	3	3	2	3	4	3	3	3	2	3	4	3	2	2	1	2	3	3	3.4	3.4	2.9	154.79	1367	1367;1297	0	5.1283	By MS/MS	By MS/MS	By MS/MS	By MS/MS	By MS/MS	By MS/MS	2.2	2.2	1.3	2.2	3.4	2.9
P08118	P08118	1	1	1	Beta-microseminoprotein	MSMB	sp|P08118|MSMB_HUMAN Beta-microseminoprotein OS=Homo sapiens OX=9606 GN=MSMB PE=1 SV=1	1	1	1	1	1	0	1	0	0	0	1	0	1	0	0	0	1	0	1	0	0	0	31.6	31.6	31.6	12.865	114	114	0	4.9469	By matching		By MS/MS				31.6	0	31.6	0	0	0
P08133	P08133	38	38	38	Annexin A6	ANXA6	sp|P08133|ANXA6_HUMAN Annexin A6 OS=Homo sapiens OX=9606 GN=ANXA6 PE=1 SV=3	1	38	38	38	38	37	38	36	36	36	38	37	38	36	36	36	38	37	38	36	36	36	51.6	51.6	51.6	75.872	673	673	0	323.31	By MS/MS	By MS/MS	By MS/MS	By MS/MS	By MS/MS	By MS/MS	51.6	51.6	51.6	47.8	49.3	48
P08134	P08134	10	4	4	Rho-related GTP-binding protein RhoC	RHOC	sp|P08134|RHOC_HUMAN Rho-related GTP-binding protein RhoC OS=Homo sapiens OX=9606 GN=RHOC PE=1 SV=1	1	10	4	4	9	10	9	10	10	10	3	4	3	4	4	4	3	4	3	4	4	4	49.2	22.3	22.3	22.006	193	193	0	19.258	By MS/MS	By MS/MS	By MS/MS	By MS/MS	By MS/MS	By MS/MS	44.6	49.2	44	49.2	49.2	49.2
P08174	P08174	10	10	10	Complement decay-accelerating factor	CD55	sp|P08174|DAF_HUMAN Complement decay-accelerating factor OS=Homo sapiens OX=9606 GN=CD55 PE=1 SV=4	1	10	10	10	10	9	10	10	10	10	10	9	10	10	10	10	10	9	10	10	10	10	23.1	23.1	23.1	41.4	381	381	0	15.634	By MS/MS	By MS/MS	By MS/MS	By MS/MS	By MS/MS	By MS/MS	23.1	21.3	23.1	23.1	23.1	23.1
P08183;P21439;Q9NP78	P08183	44;10;1	44;10;1	42;8;0	Multidrug resistance protein 1	ABCB1	sp|P08183|MDR1_HUMAN ATP-dependent translocase ABCB1 OS=Homo sapiens OX=9606 GN=ABCB1 PE=1 SV=3	3	44	44	42	38	40	41	38	39	40	38	40	41	38	39	40	36	38	39	36	37	39	36.4	36.4	35.8	141.48	1280	1280;1286;766	0	323.31	By MS/MS	By MS/MS	By MS/MS	By MS/MS	By MS/MS	By MS/MS	33.9	33	34.9	31.5	32.8	33.5
P08185	P08185	3	3	3	Corticosteroid-binding globulin	SERPINA6	sp|P08185|CBG_HUMAN Corticosteroid-binding globulin OS=Homo sapiens OX=9606 GN=SERPINA6 PE=1 SV=1	1	3	3	3	1	1	1	3	2	2	1	1	1	3	2	2	1	1	1	3	2	2	7.2	7.2	7.2	45.14	405	405	0	4.8473	By MS/MS	By MS/MS	By MS/MS	By MS/MS	By MS/MS	By MS/MS	2	2	2	7.2	5.2	5.2
P08195	P08195	13	13	13	4F2 cell-surface antigen heavy chain	SLC3A2	sp|P08195|4F2_HUMAN 4F2 cell-surface antigen heavy chain OS=Homo sapiens OX=9606 GN=SLC3A2 PE=1 SV=3	1	13	13	13	12	12	12	13	13	13	12	12	12	13	13	13	12	12	12	13	13	13	28.3	28.3	28.3	67.993	630	630	0	183.27	By MS/MS	By MS/MS	By MS/MS	By MS/MS	By MS/MS	By MS/MS	26.7	26.7	26.7	28.3	28.3	28.3
P08236	P08236	5	5	5	Beta-glucuronidase	GUSB	sp|P08236|BGLR_HUMAN Beta-glucuronidase OS=Homo sapiens OX=9606 GN=GUSB PE=1 SV=2	1	5	5	5	5	5	4	5	5	4	5	5	4	5	5	4	5	5	4	5	5	4	6.3	6.3	6.3	74.731	651	651	0	16.406	By MS/MS	By MS/MS	By MS/MS	By MS/MS	By MS/MS	By MS/MS	6.3	6.3	5.2	6.3	6.3	5.2
P08237	P08237	9	8	8	ATP-dependent 6-phosphofructokinase, muscle type	PFKM	sp|P08237|PFKAM_HUMAN ATP-dependent 6-phosphofructokinase, muscle type OS=Homo sapiens OX=9606 GN=PFKM PE=1 SV=2	1	9	8	8	7	8	7	7	5	7	6	7	6	6	5	7	6	7	6	6	5	7	13.5	12.3	12.3	85.182	780	780	0	13.862	By MS/MS	By MS/MS	By MS/MS	By MS/MS	By MS/MS	By MS/MS	11.3	11.5	11.3	10.1	7.8	11.3
P08238;Q58FF7;Q58FF8	P08238	29;12;6	17;6;3	17;6;3	Heat shock protein HSP 90-beta	HSP90AB1	sp|P08238|HS90B_HUMAN Heat shock protein HSP 90-beta OS=Homo sapiens OX=9606 GN=HSP90AB1 PE=1 SV=4	3	29	17	17	28	26	26	27	27	27	16	15	16	15	16	15	16	15	16	15	16	15	42.4	28.7	28.7	83.263	724	724;597;381	0	272.3	By MS/MS	By MS/MS	By MS/MS	By MS/MS	By MS/MS	By MS/MS	40.9	40.6	39.8	39.5	40.9	40.6
P08263;Q7RTV2;Q16772	P08263;Q7RTV2	9;5;4	1;1;0	1;1;0	Glutathione S-transferase A1;Glutathione S-transferase A1, N-terminally processed;Glutathione S-transferase A5	GSTA1;GSTA5	sp|P08263|GSTA1_HUMAN Glutathione S-transferase A1 OS=Homo sapiens OX=9606 GN=GSTA1 PE=1 SV=3;sp|Q7RTV2|GSTA5_HUMAN Glutathione S-transferase A5 OS=Homo sapiens OX=9606 GN=GSTA5 PE=1 SV=1	3	9	1	1	8	8	9	9	9	9	1	1	1	1	1	1	1	1	1	1	1	1	38.3	3.2	3.2	25.631	222	222;222;222	1	-2	By matching	By MS/MS	By matching	By MS/MS	By matching	By matching	28.8	28.8	38.3	38.3	38.3	38.3
P08294	P08294	1	1	1	Extracellular superoxide dismutase [Cu-Zn]	SOD3	sp|P08294|SODE_HUMAN Extracellular superoxide dismutase [Cu-Zn] OS=Homo sapiens OX=9606 GN=SOD3 PE=1 SV=2	1	1	1	1	1	1	0	1	1	1	1	1	0	1	1	1	1	1	0	1	1	1	3.3	3.3	3.3	25.851	240	240	0.0062478	1.6603	By MS/MS	By MS/MS		By MS/MS	By MS/MS	By MS/MS	3.3	3.3	0	3.3	3.3	3.3
P08311	P08311	4	4	4	Cathepsin G	CTSG	sp|P08311|CATG_HUMAN Cathepsin G OS=Homo sapiens OX=9606 GN=CTSG PE=1 SV=2	1	4	4	4	3	3	4	3	4	4	3	3	4	3	4	4	3	3	4	3	4	4	20.8	20.8	20.8	28.837	255	255	0	15.821	By MS/MS	By MS/MS	By MS/MS	By MS/MS	By MS/MS	By MS/MS	12.5	12.5	20.8	12.5	20.8	20.8
P08473	P08473	36	36	36	Neprilysin	MME	sp|P08473|NEP_HUMAN Neprilysin OS=Homo sapiens OX=9606 GN=MME PE=1 SV=2	1	36	36	36	34	35	36	34	35	34	34	35	36	34	35	34	34	35	36	34	35	34	48.1	48.1	48.1	85.513	750	750	0	323.31	By MS/MS	By MS/MS	By MS/MS	By MS/MS	By MS/MS	By MS/MS	43.9	46.4	48.1	44.1	46.4	44.1
P08571	P08571	9	9	9	Monocyte differentiation antigen CD14;Monocyte differentiation antigen CD14, urinary form;Monocyte differentiation antigen CD14, membrane-bound form	CD14	sp|P08571|CD14_HUMAN Monocyte differentiation antigen CD14 OS=Homo sapiens OX=9606 GN=CD14 PE=1 SV=2	1	9	9	9	7	6	7	9	9	7	7	6	7	9	9	7	7	6	7	9	9	7	32.8	32.8	32.8	40.076	375	375	0	105.99	By MS/MS	By MS/MS	By MS/MS	By MS/MS	By MS/MS	By MS/MS	27.7	25.3	25.3	32.8	32.8	28
P08572	P08572	2	2	2	Collagen alpha-2(IV) chain;Canstatin	COL4A2	sp|P08572|CO4A2_HUMAN Collagen alpha-2(IV) chain OS=Homo sapiens OX=9606 GN=COL4A2 PE=1 SV=4	1	2	2	2	1	0	0	2	2	2	1	0	0	2	2	2	1	0	0	2	2	2	1.5	1.5	1.5	167.55	1712	1712	0.0062522	1.6621	By matching			By MS/MS	By MS/MS	By MS/MS	0.9	0	0	1.5	1.5	1.5
P08575	P08575	14	14	14	Receptor-type tyrosine-protein phosphatase C	PTPRC	sp|P08575|PTPRC_HUMAN Receptor-type tyrosine-protein phosphatase C OS=Homo sapiens OX=9606 GN=PTPRC PE=1 SV=3	1	14	14	14	13	10	14	3	1	1	13	10	14	3	1	1	13	10	14	3	1	1	13.5	13.5	13.5	147.48	1306	1306	0	50.385	By MS/MS	By MS/MS	By MS/MS	By MS/MS	By matching	By matching	12.3	9	13.5	2.8	0.8	0.8
P08582	P08582	24	24	24	Melanotransferrin	MFI2	sp|P08582|TRFM_HUMAN Melanotransferrin OS=Homo sapiens OX=9606 GN=MELTF PE=1 SV=2	1	24	24	24	23	20	21	21	22	23	23	20	21	21	22	23	23	20	21	21	22	23	39.3	39.3	39.3	80.214	738	738	0	252.94	By MS/MS	By MS/MS	By MS/MS	By MS/MS	By MS/MS	By MS/MS	37.9	33.6	34.8	34.8	36.2	37.4
P08670	P08670	4	2	2	Vimentin	VIM	sp|P08670|VIME_HUMAN Vimentin OS=Homo sapiens OX=9606 GN=VIM PE=1 SV=4	1	4	2	2	4	3	3	3	3	4	2	2	2	1	1	2	2	2	2	1	1	2	7.9	4.7	4.7	53.651	466	466	0	5.6465	By MS/MS	By MS/MS	By MS/MS	By MS/MS	By MS/MS	By MS/MS	7.9	6.4	6.2	5.4	5.4	7.9
P08697	P08697	4	4	4	Alpha-2-antiplasmin	SERPINF2	sp|P08697|A2AP_HUMAN Alpha-2-antiplasmin OS=Homo sapiens OX=9606 GN=SERPINF2 PE=1 SV=3	1	4	4	4	3	2	2	4	3	3	3	2	2	4	3	3	3	2	2	4	3	3	8.4	8.4	8.4	54.565	491	491	0	10.277	By MS/MS	By MS/MS	By MS/MS	By MS/MS	By MS/MS	By MS/MS	6.7	4.1	4.1	8.4	6.7	6.7
P08754	P08754	15	7	7	Guanine nucleotide-binding protein G(k) subunit alpha	GNAI3	sp|P08754|GNAI3_HUMAN Guanine nucleotide-binding protein G(i) subunit alpha-3 OS=Homo sapiens OX=9606 GN=GNAI3 PE=1 SV=3	1	15	7	7	15	13	14	14	14	13	7	6	6	7	7	6	7	6	6	7	7	6	43.2	19.8	19.8	40.532	354	354	0	86.005	By MS/MS	By MS/MS	By MS/MS	By MS/MS	By MS/MS	By MS/MS	43.2	40.7	42.7	39	39	39
P08758	P08758	20	20	20	Annexin A5	ANXA5	sp|P08758|ANXA5_HUMAN Annexin A5 OS=Homo sapiens OX=9606 GN=ANXA5 PE=1 SV=2	1	20	20	20	20	20	19	20	18	19	20	20	19	20	18	19	20	20	19	20	18	19	49.7	49.7	49.7	35.936	320	320	0	136.21	By MS/MS	By MS/MS	By MS/MS	By MS/MS	By MS/MS	By MS/MS	49.7	49.7	46.9	49.7	45.3	49.7
P08962	P08962	3	3	3	CD63 antigen	CD63	sp|P08962|CD63_HUMAN CD63 antigen OS=Homo sapiens OX=9606 GN=CD63 PE=1 SV=2	1	3	3	3	3	3	3	3	2	3	3	3	3	3	2	3	3	3	3	3	2	3	12.6	12.6	12.6	25.636	238	238	0	20.129	By MS/MS	By MS/MS	By MS/MS	By MS/MS	By MS/MS	By MS/MS	12.6	12.6	12.6	12.6	7.6	12.6
P08F94	P08F94	13	13	13	Fibrocystin	PKHD1	sp|P08F94|PKHD1_HUMAN Fibrocystin OS=Homo sapiens OX=9606 GN=PKHD1 PE=1 SV=1	1	13	13	13	11	10	12	9	7	6	11	10	12	9	7	6	11	10	12	9	7	6	4.8	4.8	4.8	446.7	4074	4074	0	94.775	By MS/MS	By MS/MS	By MS/MS	By MS/MS	By MS/MS	By MS/MS	4.5	4.1	4.5	2.7	2.8	1.9
P09104	P09104	5	2	2	Gamma-enolase	ENO2	sp|P09104|ENOG_HUMAN Gamma-enolase OS=Homo sapiens OX=9606 GN=ENO2 PE=1 SV=3	1	5	2	2	4	4	4	3	3	4	1	1	2	1	1	2	1	1	2	1	1	2	18.9	6.2	6.2	47.268	434	434	0.0011265	2.3988	By matching	By MS/MS	By MS/MS	By MS/MS	By matching	By MS/MS	15.9	15.7	13.8	10.6	10.6	13.8
P09210	P09210	10	10	2	Glutathione S-transferase A2	GSTA2	sp|P09210|GSTA2_HUMAN Glutathione S-transferase A2 OS=Homo sapiens OX=9606 GN=GSTA2 PE=1 SV=4	1	10	10	2	9	9	9	9	9	9	9	9	9	9	9	9	2	2	1	1	1	1	41.4	41.4	6.3	25.664	222	222	0	19.556	By MS/MS	By MS/MS	By MS/MS	By MS/MS	By MS/MS	By MS/MS	32	32	38.3	38.3	38.3	38.3
P09211	P09211	10	10	10	Glutathione S-transferase P	GSTP1	sp|P09211|GSTP1_HUMAN Glutathione S-transferase P OS=Homo sapiens OX=9606 GN=GSTP1 PE=1 SV=2	1	10	10	10	9	10	9	10	10	10	9	10	9	10	10	10	9	10	9	10	10	10	57.1	57.1	57.1	23.356	210	210	0	160.4	By MS/MS	By MS/MS	By MS/MS	By MS/MS	By MS/MS	By MS/MS	50	57.1	50	57.1	57.1	57.1
P09237;P08253	P09237	4;1	4;1	4;1	Matrilysin	MMP7	sp|P09237|MMP7_HUMAN Matrilysin OS=Homo sapiens OX=9606 GN=MMP7 PE=1 SV=1	2	4	4	4	4	4	4	4	4	3	4	4	4	4	4	3	4	4	4	4	4	3	16.5	16.5	16.5	29.676	267	267;660	0	5.5137	By MS/MS	By MS/MS	By MS/MS	By MS/MS	By MS/MS	By MS/MS	16.5	16.5	16.5	16.5	16.5	11.6
P09327;O75366	P09327	30;1	30;1	30;1	Villin-1	VIL1	sp|P09327|VILI_HUMAN Villin-1 OS=Homo sapiens OX=9606 GN=VIL1 PE=1 SV=4	2	30	30	30	26	28	26	25	20	24	26	28	26	25	20	24	26	28	26	25	20	24	42.1	42.1	42.1	92.694	827	827;819	0	189.41	By MS/MS	By MS/MS	By MS/MS	By MS/MS	By MS/MS	By MS/MS	36.6	40	36.2	34.8	31.2	35.8
P09382	P09382	8	8	8	Galectin-1	LGALS1	sp|P09382|LEG1_HUMAN Galectin-1 OS=Homo sapiens OX=9606 GN=LGALS1 PE=1 SV=2	1	8	8	8	7	7	8	7	8	8	7	7	8	7	8	8	7	7	8	7	8	8	67.4	67.4	67.4	14.716	135	135	0	66.35	By MS/MS	By MS/MS	By MS/MS	By MS/MS	By MS/MS	By MS/MS	60	60	67.4	55.6	67.4	67.4
P09417	P09417	6	6	6	Dihydropteridine reductase	QDPR	sp|P09417|DHPR_HUMAN Dihydropteridine reductase OS=Homo sapiens OX=9606 GN=QDPR PE=1 SV=2	1	6	6	6	6	6	6	5	6	5	6	6	6	5	6	5	6	6	6	5	6	5	30.3	30.3	30.3	25.789	244	244	0	113.22	By MS/MS	By MS/MS	By MS/MS	By MS/MS	By MS/MS	By MS/MS	30.3	30.3	30.3	27	30.3	27
P09455	P09455	4	4	4	Retinol-binding protein 1	RBP1	sp|P09455|RET1_HUMAN Retinol-binding protein 1 OS=Homo sapiens OX=9606 GN=RBP1 PE=1 SV=2	1	4	4	4	1	3	2	2	4	3	1	3	2	2	4	3	1	3	2	2	4	3	30.4	30.4	30.4	15.85	135	135	0	5.0856	By MS/MS	By MS/MS	By MS/MS	By MS/MS	By MS/MS	By MS/MS	7.4	21.5	14.8	14.8	30.4	23
P09467	P09467	15	15	14	Fructose-1,6-bisphosphatase 1	FBP1	sp|P09467|F16P1_HUMAN Fructose-1,6-bisphosphatase 1 OS=Homo sapiens OX=9606 GN=FBP1 PE=1 SV=5	1	15	15	14	15	15	15	15	15	14	15	15	15	15	15	14	14	14	14	14	14	13	49.1	49.1	45.9	36.842	338	338	0	170.3	By MS/MS	By MS/MS	By MS/MS	By MS/MS	By MS/MS	By MS/MS	49.1	49.1	49.1	49.1	49.1	46.7
P09471	P09471	6	4	4	Guanine nucleotide-binding protein G(o) subunit alpha	GNAO1	sp|P09471|GNAO_HUMAN Guanine nucleotide-binding protein G(o) subunit alpha OS=Homo sapiens OX=9606 GN=GNAO1 PE=1 SV=4	1	6	4	4	4	4	4	5	5	4	2	2	2	3	3	2	2	2	2	3	3	2	20.1	13.6	13.6	40.05	354	354	0	8.3569	By MS/MS	By MS/MS	By MS/MS	By MS/MS	By MS/MS	By MS/MS	12.1	12.4	12.4	15.8	16.7	12.4
P09488	P09488	10	9	1	Glutathione S-transferase Mu 1	GSTM1	sp|P09488|GSTM1_HUMAN Glutathione S-transferase Mu 1 OS=Homo sapiens OX=9606 GN=GSTM1 PE=1 SV=3	1	10	9	1	9	8	9	10	10	9	8	8	8	9	9	8	1	1	1	1	1	1	48.2	45	4.1	25.712	218	218	0	81.431	By MS/MS	By MS/MS	By MS/MS	By MS/MS	By MS/MS	By MS/MS	42.2	39	42.2	48.2	48.2	42.2
P09493	P09493	7	2	2	Tropomyosin alpha-1 chain	TPM1	sp|P09493|TPM1_HUMAN Tropomyosin alpha-1 chain OS=Homo sapiens OX=9606 GN=TPM1 PE=1 SV=2	1	7	2	2	4	5	6	7	6	6	0	0	1	2	1	1	0	0	1	2	1	1	25.7	8.5	8.5	32.708	284	284	0.007214	1.55	By matching	By matching	By matching	By MS/MS	By MS/MS	By matching	14.8	17.3	22.5	25.7	20.4	20.4
P09496	P09496	1	1	1	Clathrin light chain A	CLTA	sp|P09496|CLCA_HUMAN Clathrin light chain A OS=Homo sapiens OX=9606 GN=CLTA PE=1 SV=1	1	1	1	1	1	1	1	1	1	1	1	1	1	1	1	1	1	1	1	1	1	1	6	6	6	27.076	248	248	0.00082406	3.6201	By MS/MS	By MS/MS	By MS/MS	By matching	By MS/MS	By MS/MS	6	6	6	6	6	6
P09497	P09497	1	1	1	Clathrin light chain B	CLTB	sp|P09497|CLCB_HUMAN Clathrin light chain B OS=Homo sapiens OX=9606 GN=CLTB PE=1 SV=1	1	1	1	1	1	1	1	0	1	1	1	1	1	0	1	1	1	1	1	0	1	1	4.4	4.4	4.4	25.19	229	229	0.0014942	2.3192	By MS/MS	By MS/MS	By MS/MS		By MS/MS	By matching	4.4	4.4	4.4	0	4.4	4.4
P09525	P09525	25	25	25	Annexin A4	ANXA4	sp|P09525|ANXA4_HUMAN Annexin A4 OS=Homo sapiens OX=9606 GN=ANXA4 PE=1 SV=4	1	25	25	25	22	24	24	24	23	23	22	24	24	24	23	23	22	24	24	24	23	23	63.3	63.3	63.3	35.882	319	319	0	286.07	By MS/MS	By MS/MS	By MS/MS	By MS/MS	By MS/MS	By MS/MS	54.9	63.3	63.3	63.3	63	63.3
P09543	P09543	23	23	23	2,3-cyclic-nucleotide 3-phosphodiesterase	CNP	sp|P09543|CN37_HUMAN 2,3-cyclic-nucleotide 3-phosphodiesterase OS=Homo sapiens OX=9606 GN=CNP PE=1 SV=2	1	23	23	23	20	21	22	22	19	18	20	21	22	22	19	18	20	21	22	22	19	18	39.4	39.4	39.4	47.578	421	421	0	201.96	By MS/MS	By MS/MS	By MS/MS	By MS/MS	By MS/MS	By MS/MS	39	37.3	39.4	37.8	36.8	35.4
P09619	P09619	12	12	12	Platelet-derived growth factor receptor beta	PDGFRB	sp|P09619|PGFRB_HUMAN Platelet-derived growth factor receptor beta OS=Homo sapiens OX=9606 GN=PDGFRB PE=1 SV=1	1	12	12	12	6	8	7	8	12	9	6	8	7	8	12	9	6	8	7	8	12	9	15.9	15.9	15.9	123.97	1106	1106	0	71.469	By MS/MS	By MS/MS	By MS/MS	By MS/MS	By MS/MS	By MS/MS	8	11.7	9	11.7	15.9	11
P09668	P09668	5	5	5	Pro-cathepsin H;Cathepsin H mini chain;Cathepsin H;Cathepsin H heavy chain;Cathepsin H light chain	CTSH	sp|P09668|CATH_HUMAN Pro-cathepsin H OS=Homo sapiens OX=9606 GN=CTSH PE=1 SV=4	1	5	5	5	4	5	5	2	3	3	4	5	5	2	3	3	4	5	5	2	3	3	17.9	17.9	17.9	37.393	335	335	0	20.521	By MS/MS	By MS/MS	By MS/MS	By MS/MS	By MS/MS	By MS/MS	13.4	17.9	17.9	7.8	11	12.2
P09758	P09758	5	5	5	Tumor-associated calcium signal transducer 2	TACSTD2	sp|P09758|TACD2_HUMAN Tumor-associated calcium signal transducer 2 OS=Homo sapiens OX=9606 GN=TACSTD2 PE=1 SV=3	1	5	5	5	4	5	5	5	4	4	4	5	5	5	4	4	4	5	5	5	4	4	18.3	18.3	18.3	35.709	323	323	0	37.215	By MS/MS	By MS/MS	By MS/MS	By MS/MS	By MS/MS	By MS/MS	14.6	18.3	18.3	18.3	13.3	13.3
P09848	P09848	1	1	1	Lactase-phlorizin hydrolase;Lactase;Phlorizin hydrolase	LCT	sp|P09848|LPH_HUMAN Lactase/phlorizin hydrolase OS=Homo sapiens OX=9606 GN=LCT PE=1 SV=3	1	1	1	1	1	1	1	1	1	0	1	1	1	1	1	0	1	1	1	1	1	0	0.7	0.7	0.7	218.58	1927	1927	0.002887	2.0327	By matching	By matching	By matching	By matching	By MS/MS		0.7	0.7	0.7	0.7	0.7	0
P09923;P10696;P05187	P09923	5;2;2	5;2;2	5;2;2	Intestinal-type alkaline phosphatase	ALPI	sp|P09923|PPBI_HUMAN Intestinal-type alkaline phosphatase OS=Homo sapiens OX=9606 GN=ALPI PE=1 SV=2	3	5	5	5	5	5	5	3	2	4	5	5	5	3	2	4	5	5	5	3	2	4	11.2	11.2	11.2	56.811	528	528;532;535	0	10.158	By MS/MS	By MS/MS	By MS/MS	By MS/MS	By MS/MS	By MS/MS	11.2	11.2	11.2	5.5	4.2	9.3
P09936	P09936	10	10	10	Ubiquitin carboxyl-terminal hydrolase isozyme L1	UCHL1	sp|P09936|UCHL1_HUMAN Ubiquitin carboxyl-terminal hydrolase isozyme L1 OS=Homo sapiens OX=9606 GN=UCHL1 PE=1 SV=2	1	10	10	10	10	9	10	9	10	10	10	9	10	9	10	10	10	9	10	9	10	10	44.4	44.4	44.4	24.824	223	223	0	52.726	By MS/MS	By MS/MS	By MS/MS	By MS/MS	By MS/MS	By MS/MS	44.4	40.8	44.4	40.8	44.4	44.4
P09960	P09960	17	17	17	Leukotriene A-4 hydrolase	LTA4H	sp|P09960|LKHA4_HUMAN Leukotriene A-4 hydrolase OS=Homo sapiens OX=9606 GN=LTA4H PE=1 SV=2	1	17	17	17	15	13	13	14	14	15	15	13	13	14	14	15	15	13	13	14	14	15	32.7	32.7	32.7	69.284	611	611	0	157.79	By MS/MS	By MS/MS	By MS/MS	By MS/MS	By MS/MS	By MS/MS	29.1	27	25.7	29	28.5	29.8
P09972	P09972	9	4	4	Fructose-bisphosphate aldolase C	ALDOC	sp|P09972|ALDOC_HUMAN Fructose-bisphosphate aldolase C OS=Homo sapiens OX=9606 GN=ALDOC PE=1 SV=2	1	9	4	4	8	6	6	8	8	7	3	2	2	3	3	3	3	2	2	3	3	3	28.8	15.4	15.4	39.455	364	364	0	70.532	By MS/MS	By MS/MS	By MS/MS	By MS/MS	By matching	By MS/MS	25.5	21.7	20.1	25.5	25.5	25
P0C0L5	P0C0L5	24	24	3	Complement C4-B;Complement C4 beta chain;Complement C4-B alpha chain;C4a anaphylatoxin;C4b-B;C4d-B;Complement C4 gamma chain	C4B	sp|P0C0L5|CO4B_HUMAN Complement C4-B OS=Homo sapiens OX=9606 GN=C4B PE=1 SV=2	1	24	24	3	17	20	19	23	22	22	17	20	19	23	22	22	2	3	2	3	3	3	16.2	16.2	2.8	192.75	1744	1744	0	147.14	By MS/MS	By MS/MS	By MS/MS	By MS/MS	By MS/MS	By MS/MS	11.9	13.5	13	15.8	15.1	15.2
P0CG30;P0CG29	P0CG30;P0CG29	3;3	3;3	3;3	Glutathione S-transferase theta-2B;Glutathione S-transferase theta-2	GSTT2B;GSTT2	sp|P0CG30|GSTT2_HUMAN Glutathione S-transferase theta-2B OS=Homo sapiens OX=9606 GN=GSTT2B PE=1 SV=1;sp|P0CG29|GST2_HUMAN Glutathione S-transferase theta-2 OS=Homo sapiens OX=9606 GN=GSTT2 PE=1 SV=1	2	3	3	3	3	1	0	1	1	1	3	1	0	1	1	1	3	1	0	1	1	1	16.8	16.8	16.8	27.507	244	244;244	0.0011299	2.4307	By MS/MS	By MS/MS		By MS/MS	By MS/MS	By MS/MS	16.8	4.1	0	4.1	4.1	4.1
P0CG47;P0CG48;P62987;P62979	P0CG47;P0CG48;P62987;P62979	7;7;6;6	7;7;6;6	7;7;6;6	Polyubiquitin-B;Ubiquitin;Polyubiquitin-C;Ubiquitin;Ubiquitin-60S ribosomal protein L40;Ubiquitin;60S ribosomal protein L40;Ubiquitin-40S ribosomal protein S27a;Ubiquitin;40S ribosomal protein S27a	UBB;UBC;UBA52;RPS27A	sp|P0CG47|UBB_HUMAN Polyubiquitin-B OS=Homo sapiens OX=9606 GN=UBB PE=1 SV=1;sp|P0CG48|UBC_HUMAN Polyubiquitin-C OS=Homo sapiens OX=9606 GN=UBC PE=1 SV=3;sp|P62987|RL40_HUMAN Ubiquitin-60S ribosomal protein L40 OS=Homo sapiens OX=9606 GN=UBA52 PE=1 SV=2;sp	4	7	7	7	7	7	7	7	5	7	7	7	7	7	5	7	7	7	7	7	5	7	79	79	79	25.761	229	229;685;128;156	0	117.99	By MS/MS	By MS/MS	By MS/MS	By MS/MS	By MS/MS	By MS/MS	79	79	79	79	72.1	79
P0DJI9;P0DJI8	P0DJI9;P0DJI8	1;1	1;1	1;1	Serum amyloid A-2 protein;Serum amyloid A-1 protein;Amyloid protein A;Serum amyloid protein A(2-104);Serum amyloid protein A(3-104);Serum amyloid protein A(2-103);Serum amyloid protein A(2-102);Serum amyloid protein A(4-101)	SAA2;SAA1	sp|P0DJI9|SAA2_HUMAN Serum amyloid A-2 protein OS=Homo sapiens OX=9606 GN=SAA2 PE=1 SV=1;sp|P0DJI8|SAA1_HUMAN Serum amyloid A-1 protein OS=Homo sapiens OX=9606 GN=SAA1 PE=1 SV=1	2	1	1	1	0	0	0	1	0	0	0	0	0	1	0	0	0	0	0	1	0	0	10.7	10.7	10.7	13.527	122	122;122	0.0014892	2.2883				By MS/MS			0	0	0	10.7	0	0
P0DMV9;P0DMV8	P0DMV9;P0DMV8	32;32	28;28	16;16	Heat shock 70 kDa protein 1B;Heat shock 70 kDa protein 1A	HSPA1B;HSPA1A	sp|P0DMV9|HS71B_HUMAN Heat shock 70 kDa protein 1B OS=Homo sapiens OX=9606 GN=HSPA1B PE=1 SV=1;sp|P0DMV8|HS71A_HUMAN Heat shock 70 kDa protein 1A OS=Homo sapiens OX=9606 GN=HSPA1A PE=1 SV=1	2	32	28	16	29	30	31	30	30	30	25	26	27	26	26	26	15	15	15	15	15	15	54.3	50.1	30.6	70.051	641	641;641	0	233.37	By MS/MS	By MS/MS	By MS/MS	By MS/MS	By MS/MS	By MS/MS	49.9	49.9	54.3	49.9	49.9	49.9
P0DOX2;A0A0C4DH42;P0DP02;A0A0J9YVY3;A0A0B4J1X5;A0A0B4J1V1;P01767;P01772;P01763;P01762	P0DOX2	11;1;1;1;1;1;1;1;1;1	6;1;1;1;1;1;1;1;1;1	0;0;0;0;0;0;0;0;0;0			sp|P0DOX2|IGA2_HUMAN Immunoglobulin alpha-2 heavy chain OS=Homo sapiens OX=9606 PE=1 SV=2	10	11	6	0	11	11	11	11	11	11	6	6	6	6	6	6	0	0	0	0	0	0	32.3	25.1	0	48.934	455	455;116;117;117;117;117;116;117;117;117	0	120.32	By MS/MS	By MS/MS	By MS/MS	By MS/MS	By MS/MS	By MS/MS	32.3	32.3	32.3	32.3	32.3	32.3
P0DOX6	P0DOX6	8	1	1			sp|P0DOX6|IGM_HUMAN Immunoglobulin mu heavy chain OS=Homo sapiens OX=9606 PE=1 SV=2	1	8	1	1	8	7	8	8	7	7	1	0	1	1	0	0	1	0	1	1	0	0	19.3	3.8	3.8	63.485	576	576	0	32.725	By MS/MS	By matching	By MS/MS	By matching	By matching	By matching	19.3	15.5	19.3	19.3	15.5	15.5
P0DOX7;P01602	P0DOX7	7;1	7;1	2;1			sp|P0DOX7|IGK_HUMAN Immunoglobulin kappa light chain OS=Homo sapiens OX=9606 PE=1 SV=1	2	7	7	2	7	7	5	6	7	7	7	7	5	6	7	7	2	2	2	2	2	2	41.1	41.1	14	23.379	214	214;117	0	323.31	By MS/MS	By MS/MS	By MS/MS	By MS/MS	By MS/MS	By MS/MS	41.1	41.1	31.8	41.1	41.1	41.1
P0DOY3;P0DOY2;P0CF74;A0M8Q6	P0DOY3;P0DOY2;P0CF74;A0M8Q6	4;4;3;2	2;2;1;1	2;2;1;1	Ig lambda-6 chain C region;Ig lambda-7 chain C region	IGLC6;IGLC7	sp|P0DOY3|IGLC3_HUMAN Immunoglobulin lambda constant 3 OS=Homo sapiens OX=9606 GN=IGLC3 PE=1 SV=1;sp|P0DOY2|IGLC2_HUMAN Immunoglobulin lambda constant 2 OS=Homo sapiens OX=9606 GN=IGLC2 PE=1 SV=1;sp|P0CF74|IGLC6_HUMAN Immunoglobulin lambda constant 6 OS=Ho	4	4	2	2	4	4	4	4	4	4	2	2	2	2	2	2	2	2	2	2	2	2	55.7	27.4	27.4	11.265	106	106;106;106;106	0	9.1306	By MS/MS	By MS/MS	By MS/MS	By MS/MS	By MS/MS	By MS/MS	55.7	55.7	55.7	55.7	55.7	55.7
P0DP25;P0DP24;P0DP23;P02585	P0DP25;P0DP24;P0DP23	13;13;13;1	13;13;13;1	10;10;10;0			sp|P0DP25|CALM3_HUMAN Calmodulin-3 OS=Homo sapiens OX=9606 GN=CALM3 PE=1 SV=1;sp|P0DP24|CALM2_HUMAN Calmodulin-2 OS=Homo sapiens OX=9606 GN=CALM2 PE=1 SV=1;sp|P0DP23|CALM1_HUMAN Calmodulin-1 OS=Homo sapiens OX=9606 GN=CALM1 PE=1 SV=1	4	13	13	10	11	11	11	12	12	12	11	11	11	12	12	12	9	9	9	9	9	10	51.7	51.7	47	16.837	149	149;149;149;160	0	110.07	By MS/MS	By MS/MS	By MS/MS	By MS/MS	By MS/MS	By MS/MS	45.6	45.6	45.6	45.6	45.6	51.7
P0DP57	P0DP57	1	1	1			sp|P0DP57|SLUR2_HUMAN Secreted Ly-6/uPAR domain-containing protein 2 OS=Homo sapiens OX=9606 GN=SLURP2 PE=1 SV=1	1	1	1	1	1	1	1	1	1	1	1	1	1	1	1	1	1	1	1	1	1	1	13.4	13.4	13.4	10.16	97	97	0	5.4128	By MS/MS	By MS/MS	By matching	By MS/MS	By MS/MS	By MS/MS	13.4	13.4	13.4	13.4	13.4	13.4
P0DP58	P0DP58	1	1	1			sp|P0DP58|LYNX1_HUMAN Ly-6/neurotoxin-like protein 1 OS=Homo sapiens OX=9606 GN=LYNX1 PE=1 SV=1	1	1	1	1	1	0	1	0	1	1	1	0	1	0	1	1	1	0	1	0	1	1	9.5	9.5	9.5	12.641	116	116	0.0011623	2.7419	By matching		By MS/MS		By MS/MS	By MS/MS	9.5	0	9.5	0	9.5	9.5
P10114	P10114	7	3	3	Ras-related protein Rap-2a	RAP2A	sp|P10114|RAP2A_HUMAN Ras-related protein Rap-2a OS=Homo sapiens OX=9606 GN=RAP2A PE=1 SV=1	1	7	3	3	6	6	5	6	6	6	3	3	3	3	3	3	3	3	3	3	3	3	42.1	21.9	21.9	20.615	183	183	0	26.286	By MS/MS	By MS/MS	By MS/MS	By MS/MS	By MS/MS	By MS/MS	41.5	42.1	36.1	42.1	42.1	42.1
P10153	P10153	2	2	2	Non-secretory ribonuclease	RNASE2	sp|P10153|RNAS2_HUMAN Non-secretory ribonuclease OS=Homo sapiens OX=9606 GN=RNASE2 PE=1 SV=2	1	2	2	2	2	2	2	1	1	1	2	2	2	1	1	1	2	2	2	1	1	1	20.5	20.5	20.5	18.354	161	161	0	8.8502	By MS/MS	By MS/MS	By MS/MS	By MS/MS	By matching	By MS/MS	20.5	20.5	20.5	10.6	10.6	10.6
P10155	P10155	3	3	3	60 kDa SS-A/Ro ribonucleoprotein	TROVE2	sp|P10155|RO60_HUMAN RNA-binding protein RO60 OS=Homo sapiens OX=9606 GN=RO60 PE=1 SV=2	1	3	3	3	1	1	2	2	1	1	1	1	2	2	1	1	1	1	2	2	1	1	5.6	5.6	5.6	60.67	538	538	0.00083857	3.7614	By MS/MS	By MS/MS	By MS/MS	By MS/MS	By MS/MS	By matching	2	2	4.1	3.5	2	2
P10253	P10253	3	3	3	Lysosomal alpha-glucosidase;76 kDa lysosomal alpha-glucosidase;70 kDa lysosomal alpha-glucosidase	GAA	sp|P10253|LYAG_HUMAN Lysosomal alpha-glucosidase OS=Homo sapiens OX=9606 GN=GAA PE=1 SV=4	1	3	3	3	3	3	3	3	3	3	3	3	3	3	3	3	3	3	3	3	3	3	4.3	4.3	4.3	105.32	952	952	0	12.904	By MS/MS	By MS/MS	By MS/MS	By MS/MS	By MS/MS	By MS/MS	4.3	4.3	4.3	4.3	4.3	4.3
P10301	P10301	9	7	7	Ras-related protein R-Ras	RRAS	sp|P10301|RRAS_HUMAN Ras-related protein R-Ras OS=Homo sapiens OX=9606 GN=RRAS PE=1 SV=1	1	9	7	7	8	9	8	9	7	7	7	7	7	7	6	5	7	7	7	7	6	5	51.8	39.4	39.4	23.48	218	218	0	53.342	By MS/MS	By MS/MS	By MS/MS	By MS/MS	By MS/MS	By MS/MS	44.5	51.8	44.5	51.8	37.6	41.7
P10321	P10321	5	4	2	HLA class I histocompatibility antigen, Cw-7 alpha chain	HLA-C	sp|P10321|HLAC_HUMAN HLA class I histocompatibility antigen, C alpha chain OS=Homo sapiens OX=9606 GN=HLA-C PE=1 SV=3	1	5	4	2	4	4	4	5	4	5	3	3	3	4	3	4	1	1	1	2	2	2	21.3	14.8	8.5	40.648	366	366	0	17.466	By MS/MS	By MS/MS	By MS/MS	By MS/MS	By MS/MS	By MS/MS	17.8	17.8	17.8	21.3	18.9	21.3
P10398;P04049	P10398	4;1	4;1	3;0	Serine/threonine-protein kinase A-Raf	ARAF	sp|P10398|ARAF_HUMAN Serine/threonine-protein kinase A-Raf OS=Homo sapiens OX=9606 GN=ARAF PE=1 SV=2	2	4	4	3	4	3	3	3	4	4	4	3	3	3	4	4	3	2	2	2	3	3	7.6	7.6	5.9	67.585	606	606;648	0	5.33	By MS/MS	By MS/MS	By MS/MS	By MS/MS	By MS/MS	By MS/MS	7.6	5.8	5.6	5.4	7.6	7.6
P16403;P10412;P16402;Q02539;P22492	P16403;P10412;P16402;Q02539	5;5;5;3;2	5;5;5;3;2	3;3;3;1;1	Histone H1.2;Histone H1.4;Histone H1.3;Histone H1.1	HIST1H1C;HIST1H1E;HIST1H1D;HIST1H1A	sp|P16403|H12_HUMAN Histone H1.2 OS=Homo sapiens OX=9606 GN=H1-2 PE=1 SV=2;sp|P10412|H14_HUMAN Histone H1.4 OS=Homo sapiens OX=9606 GN=H1-4 PE=1 SV=2;sp|P16402|H13_HUMAN Histone H1.3 OS=Homo sapiens OX=9606 GN=H1-3 PE=1 SV=2;sp|Q02539|H11_HUMAN Histone H1.	5	5	5	3	3	3	2	4	4	5	3	3	2	4	4	5	3	3	2	3	3	3	22.5	22.5	15	21.364	213	213;219;221;215;207	0	8.3659	By MS/MS	By MS/MS	By MS/MS	By MS/MS	By MS/MS	By MS/MS	15	15	10.8	18.3	19.2	22.5
P10451	P10451	3	3	3	Osteopontin	SPP1	sp|P10451|OSTP_HUMAN Osteopontin OS=Homo sapiens OX=9606 GN=SPP1 PE=1 SV=1	1	3	3	3	1	1	1	3	3	3	1	1	1	3	3	3	1	1	1	3	3	3	17.2	17.2	17.2	35.422	314	314	0	42.475	By matching	By matching	By MS/MS	By MS/MS	By MS/MS	By MS/MS	6.1	6.1	6.1	17.2	17.2	17.2
P10586	P10586	5	1	1	Receptor-type tyrosine-protein phosphatase F	PTPRF	sp|P10586|PTPRF_HUMAN Receptor-type tyrosine-protein phosphatase F OS=Homo sapiens OX=9606 GN=PTPRF PE=1 SV=2	1	5	1	1	5	3	3	5	4	4	1	0	0	1	0	0	1	0	0	1	0	0	3.4	0.9	0.9	212.88	1907	1907	0.0022148	2.1986	By MS/MS	By matching	By matching	By matching	By matching	By matching	3.4	1.8	1.8	3.4	2.5	2.5
P10599	P10599	7	7	7	Thioredoxin	TXN	sp|P10599|THIO_HUMAN Thioredoxin OS=Homo sapiens OX=9606 GN=TXN PE=1 SV=3	1	7	7	7	7	7	7	7	7	7	7	7	7	7	7	7	7	7	7	7	7	7	62.9	62.9	62.9	11.737	105	105	0	24.647	By MS/MS	By MS/MS	By MS/MS	By MS/MS	By MS/MS	By MS/MS	62.9	62.9	62.9	62.9	62.9	62.9
P10619	P10619	7	7	7	Lysosomal protective protein;Lysosomal protective protein 32 kDa chain;Lysosomal protective protein 20 kDa chain	CTSA	sp|P10619|PPGB_HUMAN Lysosomal protective protein OS=Homo sapiens OX=9606 GN=CTSA PE=1 SV=2	1	7	7	7	7	7	7	7	7	7	7	7	7	7	7	7	7	7	7	7	7	7	14.4	14.4	14.4	54.465	480	480	0	46.093	By MS/MS	By MS/MS	By MS/MS	By MS/MS	By MS/MS	By MS/MS	14.4	14.4	14.4	14.4	14.4	14.4
P10636	P10636	1	1	1	Microtubule-associated protein tau	MAPT	sp|P10636|TAU_HUMAN Microtubule-associated protein tau OS=Homo sapiens OX=9606 GN=MAPT PE=1 SV=5	1	1	1	1	1	1	1	0	1	1	1	1	1	0	1	1	1	1	1	0	1	1	2.6	2.6	2.6	78.927	758	758	0	4.8451	By matching	By MS/MS	By matching		By matching	By MS/MS	2.6	2.6	2.6	0	2.6	2.6
P10643	P10643	4	4	4	Complement component C7	C7	sp|P10643|CO7_HUMAN Complement component C7 OS=Homo sapiens OX=9606 GN=C7 PE=1 SV=2	1	4	4	4	3	3	2	4	4	3	3	3	2	4	4	3	3	3	2	4	4	3	6.8	6.8	6.8	93.517	843	843	0	40.412	By MS/MS	By MS/MS	By matching	By MS/MS	By MS/MS	By MS/MS	5.2	5.2	4	6.8	6.8	5.6
P10644	P10644	9	9	9	cAMP-dependent protein kinase type I-alpha regulatory subunit;cAMP-dependent protein kinase type I-alpha regulatory subunit, N-terminally processed	PRKAR1A	sp|P10644|KAP0_HUMAN cAMP-dependent protein kinase type I-alpha regulatory subunit OS=Homo sapiens OX=9606 GN=PRKAR1A PE=1 SV=1	1	9	9	9	8	8	7	6	7	8	8	8	7	6	7	8	8	8	7	6	7	8	29.1	29.1	29.1	42.981	381	381	0	73.077	By MS/MS	By MS/MS	By MS/MS	By MS/MS	By MS/MS	By MS/MS	26.5	24.4	21.8	18.6	21.8	24.4
P10768	P10768	7	7	7	S-formylglutathione hydrolase	ESD	sp|P10768|ESTD_HUMAN S-formylglutathione hydrolase OS=Homo sapiens OX=9606 GN=ESD PE=1 SV=2	1	7	7	7	7	7	7	7	7	7	7	7	7	7	7	7	7	7	7	7	7	7	30.1	30.1	30.1	31.462	282	282	0	66.944	By MS/MS	By MS/MS	By MS/MS	By MS/MS	By MS/MS	By MS/MS	30.1	30.1	30.1	30.1	30.1	30.1
P10909	P10909	10	10	10	Clusterin;Clusterin beta chain;Clusterin alpha chain	CLU	sp|P10909|CLUS_HUMAN Clusterin OS=Homo sapiens OX=9606 GN=CLU PE=1 SV=1	1	10	10	10	10	10	10	10	10	10	10	10	10	10	10	10	10	10	10	10	10	10	24.9	24.9	24.9	52.494	449	449	0	72.867	By MS/MS	By MS/MS	By MS/MS	By MS/MS	By MS/MS	By MS/MS	24.9	24.9	24.9	24.9	24.9	24.9
P10911	P10911	1	1	1	Proto-oncogene DBL;MCF2-transforming protein;DBL-transforming protein	MCF2	sp|P10911|MCF2_HUMAN Proto-oncogene DBL OS=Homo sapiens OX=9606 GN=MCF2 PE=1 SV=3	1	1	1	1	1	1	1	1	1	1	1	1	1	1	1	1	1	1	1	1	1	1	0.8	0.8	0.8	107.67	925	925	0.0052724	1.7837	By MS/MS	By MS/MS	By MS/MS	By MS/MS	By MS/MS	By MS/MS	0.8	0.8	0.8	0.8	0.8	0.8
P11021	P11021	5	4	4	78 kDa glucose-regulated protein	HSPA5	sp|P11021|BIP_HUMAN Endoplasmic reticulum chaperone BiP OS=Homo sapiens OX=9606 GN=HSPA5 PE=1 SV=2	1	5	4	4	2	2	2	3	4	4	1	1	1	2	3	3	1	1	1	2	3	3	10.7	8.3	8.3	72.332	654	654	0	11.852	By MS/MS	By MS/MS	By matching	By MS/MS	By MS/MS	By MS/MS	4.3	4.7	4.3	6.1	8.4	8.4
P11117	P11117	9	9	9	Lysosomal acid phosphatase	ACP2	sp|P11117|PPAL_HUMAN Lysosomal acid phosphatase OS=Homo sapiens OX=9606 GN=ACP2 PE=1 SV=3	1	9	9	9	9	9	9	9	9	9	9	9	9	9	9	9	9	9	9	9	9	9	24.1	24.1	24.1	48.344	423	423	0	50.658	By MS/MS	By MS/MS	By MS/MS	By MS/MS	By MS/MS	By MS/MS	24.1	24.1	24.1	24.1	24.1	24.1
P11142	P11142	36	36	24	Heat shock cognate 71 kDa protein	HSPA8	sp|P11142|HSP7C_HUMAN Heat shock cognate 71 kDa protein OS=Homo sapiens OX=9606 GN=HSPA8 PE=1 SV=1	1	36	36	24	33	35	35	33	35	33	33	35	35	33	35	33	22	24	24	22	23	22	61.6	61.6	46.9	70.897	646	646	0	323.31	By MS/MS	By MS/MS	By MS/MS	By MS/MS	By MS/MS	By MS/MS	56.7	61.3	61.3	56.7	60.5	56.7
P11166	P11166	1	1	1	Solute carrier family 2, facilitated glucose transporter member 1	SLC2A1	sp|P11166|GTR1_HUMAN Solute carrier family 2, facilitated glucose transporter member 1 OS=Homo sapiens OX=9606 GN=SLC2A1 PE=1 SV=2	1	1	1	1	0	0	0	1	1	1	0	0	0	1	1	1	0	0	0	1	1	1	3	3	3	54.083	492	492	0	35.767				By MS/MS	By matching	By MS/MS	0	0	0	3	3	3
P11168	P11168	3	3	3	Solute carrier family 2, facilitated glucose transporter member 2	SLC2A2	sp|P11168|GTR2_HUMAN Solute carrier family 2, facilitated glucose transporter member 2 OS=Homo sapiens OX=9606 GN=SLC2A2 PE=1 SV=1	1	3	3	3	3	3	2	3	3	3	3	3	2	3	3	3	3	3	2	3	3	3	5.7	5.7	5.7	57.489	524	524	0	6.2249	By MS/MS	By MS/MS	By MS/MS	By MS/MS	By MS/MS	By MS/MS	5.7	5.7	3.6	5.7	5.7	5.7
P11169;Q8TDB8	P11169;Q8TDB8	3;2	3;2	3;2	Solute carrier family 2, facilitated glucose transporter member 3;Solute carrier family 2, facilitated glucose transporter member 14	SLC2A3;SLC2A14	sp|P11169|GTR3_HUMAN Solute carrier family 2, facilitated glucose transporter member 3 OS=Homo sapiens OX=9606 GN=SLC2A3 PE=1 SV=1;sp|Q8TDB8|GTR14_HUMAN Solute carrier family 2, facilitated glucose transporter member 14 OS=Homo sapiens OX=9606 GN=SLC2A14 P	2	3	3	3	2	3	2	1	1	1	2	3	2	1	1	1	2	3	2	1	1	1	7.9	7.9	7.9	53.924	496	496;520	0	40.868	By MS/MS	By MS/MS	By MS/MS	By matching	By matching	By MS/MS	5.6	7.9	5.2	3	3	3
P11172	P11172	7	7	7	Uridine 5-monophosphate synthase;Orotate phosphoribosyltransferase;Orotidine 5-phosphate decarboxylase	UMPS	sp|P11172|UMPS_HUMAN Uridine 5-monophosphate synthase OS=Homo sapiens OX=9606 GN=UMPS PE=1 SV=1	1	7	7	7	6	7	5	6	6	7	6	7	5	6	6	7	6	7	5	6	6	7	15.8	15.8	15.8	52.221	480	480	0	8.871	By MS/MS	By MS/MS	By MS/MS	By MS/MS	By MS/MS	By MS/MS	14.4	15.8	12.1	13.5	14.4	15.8
P11215	P11215	4	4	4	Integrin alpha-M	ITGAM	sp|P11215|ITAM_HUMAN Integrin alpha-M OS=Homo sapiens OX=9606 GN=ITGAM PE=1 SV=2	1	4	4	4	3	2	3	1	2	2	3	2	3	1	2	2	3	2	3	1	2	2	4.4	4.4	4.4	127.18	1152	1152	0	5.4782	By MS/MS	By MS/MS	By MS/MS	By matching	By MS/MS	By matching	3.1	2.3	3.6	1	2.3	2.3
P11216	P11216	14	14	14	Glycogen phosphorylase, brain form	PYGB	sp|P11216|PYGB_HUMAN Glycogen phosphorylase, brain form OS=Homo sapiens OX=9606 GN=PYGB PE=1 SV=5	1	14	14	14	13	11	13	14	13	12	13	11	13	14	13	12	13	11	13	14	13	12	21	21	21	96.695	843	843	0	40.084	By MS/MS	By MS/MS	By MS/MS	By MS/MS	By MS/MS	By MS/MS	20.2	17.8	20.2	21	20.2	19
P11233	P11233	7	7	5	Ras-related protein Ral-A	RALA	sp|P11233|RALA_HUMAN Ras-related protein Ral-A OS=Homo sapiens OX=9606 GN=RALA PE=1 SV=1	1	7	7	5	7	6	6	6	6	6	7	6	6	6	6	6	5	5	4	5	4	4	40.8	40.8	22.8	23.567	206	206	0	44.46	By MS/MS	By MS/MS	By MS/MS	By MS/MS	By MS/MS	By MS/MS	40.8	28.2	34	28.2	34	34
P11234	P11234	7	5	5	Ras-related protein Ral-B	RALB	sp|P11234|RALB_HUMAN Ras-related protein Ral-B OS=Homo sapiens OX=9606 GN=RALB PE=1 SV=1	1	7	5	5	7	6	7	6	7	7	5	5	5	5	5	5	5	5	5	5	5	5	39.8	21.8	21.8	23.408	206	206	0	21.47	By MS/MS	By MS/MS	By MS/MS	By MS/MS	By MS/MS	By MS/MS	39.8	27.2	39.8	27.2	39.8	39.8
P11274	P11274	25	25	24	Breakpoint cluster region protein	BCR	sp|P11274|BCR_HUMAN Breakpoint cluster region protein OS=Homo sapiens OX=9606 GN=BCR PE=1 SV=2	1	25	25	24	21	21	19	22	23	21	21	21	19	22	23	21	20	20	18	21	22	20	21.6	21.6	20.8	142.82	1271	1271	0	251.86	By MS/MS	By MS/MS	By MS/MS	By MS/MS	By MS/MS	By MS/MS	18.6	17.8	16.2	19.3	20.7	18
P11279	P11279	9	9	9	Lysosome-associated membrane glycoprotein 1	LAMP1	sp|P11279|LAMP1_HUMAN Lysosome-associated membrane glycoprotein 1 OS=Homo sapiens OX=9606 GN=LAMP1 PE=1 SV=3	1	9	9	9	9	9	9	9	9	9	9	9	9	9	9	9	9	9	9	9	9	9	14.4	14.4	14.4	44.882	417	417	0	110.8	By MS/MS	By MS/MS	By MS/MS	By MS/MS	By MS/MS	By MS/MS	14.4	14.4	14.4	14.4	14.4	14.4
P11413	P11413	4	4	4	Glucose-6-phosphate 1-dehydrogenase	G6PD	sp|P11413|G6PD_HUMAN Glucose-6-phosphate 1-dehydrogenase OS=Homo sapiens OX=9606 GN=G6PD PE=1 SV=4	1	4	4	4	4	4	4	4	4	4	4	4	4	4	4	4	4	4	4	4	4	4	8.3	8.3	8.3	59.256	515	515	0	8.2859	By MS/MS	By MS/MS	By MS/MS	By MS/MS	By MS/MS	By MS/MS	8.3	8.3	8.3	8.3	8.3	8.3
P11586	P11586	30	30	30	C-1-tetrahydrofolate synthase, cytoplasmic;Methylenetetrahydrofolate dehydrogenase;Methenyltetrahydrofolate cyclohydrolase;Formyltetrahydrofolate synthetase;C-1-tetrahydrofolate synthase, cytoplasmic, N-terminally processed	MTHFD1	sp|P11586|C1TC_HUMAN C-1-tetrahydrofolate synthase, cytoplasmic OS=Homo sapiens OX=9606 GN=MTHFD1 PE=1 SV=4	1	30	30	30	29	28	28	27	27	29	29	28	28	27	27	29	29	28	28	27	27	29	37.4	37.4	37.4	101.53	935	935	0	205.81	By MS/MS	By MS/MS	By MS/MS	By MS/MS	By MS/MS	By MS/MS	36.5	37.4	37.4	36.6	34.9	37.4
P11597	P11597	4	4	4	Cholesteryl ester transfer protein	CETP	sp|P11597|CETP_HUMAN Cholesteryl ester transfer protein OS=Homo sapiens OX=9606 GN=CETP PE=1 SV=2	1	4	4	4	3	4	3	4	4	4	3	4	3	4	4	4	3	4	3	4	4	4	8.9	8.9	8.9	54.756	493	493	0	15.729	By MS/MS	By MS/MS	By MS/MS	By MS/MS	By MS/MS	By MS/MS	6.5	8.9	6.5	8.9	8.9	8.9
P11678	P11678	3	1	1	Eosinophil peroxidase;Eosinophil peroxidase light chain;Eosinophil peroxidase heavy chain	EPX	sp|P11678|PERE_HUMAN Eosinophil peroxidase OS=Homo sapiens OX=9606 GN=EPX PE=1 SV=2	1	3	1	1	2	0	2	0	2	2	0	0	0	0	1	1	0	0	0	0	1	1	4.3	1.8	1.8	81.04	715	715	0.0035651	1.9351	By matching		By matching		By matching	By MS/MS	2.5	0	2.5	0	3.2	3.2
P11766	P11766	16	16	16	Alcohol dehydrogenase class-3	ADH5	sp|P11766|ADHX_HUMAN Alcohol dehydrogenase class-3 OS=Homo sapiens OX=9606 GN=ADH5 PE=1 SV=4	1	16	16	16	14	14	14	15	16	15	14	14	14	15	16	15	14	14	14	15	16	15	42.2	42.2	42.2	39.724	374	374	0	155.91	By MS/MS	By MS/MS	By MS/MS	By MS/MS	By MS/MS	By MS/MS	38	38	38	41.7	42.2	40.4
P11801	P11801	7	7	7	Serine/threonine-protein kinase H1	PSKH1	sp|P11801|KPSH1_HUMAN Serine/threonine-protein kinase H1 OS=Homo sapiens OX=9606 GN=PSKH1 PE=1 SV=4	1	7	7	7	7	7	6	5	7	6	7	7	6	5	7	6	7	7	6	5	7	6	17.5	17.5	17.5	48.035	424	424	0	12.02	By MS/MS	By MS/MS	By MS/MS	By MS/MS	By MS/MS	By MS/MS	17.5	17.5	13.7	11.8	17.5	13.7
P11908	P11908	6	6	3	Ribose-phosphate pyrophosphokinase 2	PRPS2	sp|P11908|PRPS2_HUMAN Ribose-phosphate pyrophosphokinase 2 OS=Homo sapiens OX=9606 GN=PRPS2 PE=1 SV=2	1	6	6	3	5	5	5	6	6	6	5	5	5	6	6	6	3	3	3	3	3	3	29.6	29.6	14.2	34.769	318	318	0	32.32	By MS/MS	By MS/MS	By MS/MS	By MS/MS	By MS/MS	By MS/MS	25.2	25.2	25.2	29.6	29.6	29.6
P11940;Q9H361;Q4VXU2	P11940	5;2;1	5;2;1	4;2;1	Polyadenylate-binding protein 1	PABPC1	sp|P11940|PABP1_HUMAN Polyadenylate-binding protein 1 OS=Homo sapiens OX=9606 GN=PABPC1 PE=1 SV=2	3	5	5	4	4	5	4	5	5	5	4	5	4	5	5	5	3	4	4	4	4	4	9.1	9.1	7.4	70.67	636	636;631;614	0	12.427	By MS/MS	By MS/MS	By MS/MS	By MS/MS	By MS/MS	By MS/MS	7.7	9.1	7.4	9.1	9.1	9.1
P12081	P12081	3	3	3	Histidine--tRNA ligase, cytoplasmic	HARS	sp|P12081|HARS1_HUMAN Histidine--tRNA ligase, cytoplasmic OS=Homo sapiens OX=9606 GN=HARS1 PE=1 SV=2	1	3	3	3	3	3	3	3	2	3	3	3	3	3	2	3	3	3	3	3	2	3	6.1	6.1	6.1	57.41	509	509	0	6.3401	By MS/MS	By MS/MS	By MS/MS	By MS/MS	By MS/MS	By MS/MS	6.1	6.1	6.1	6.1	4.5	6.1
P12109	P12109	6	6	6	Collagen alpha-1(VI) chain	COL6A1	sp|P12109|CO6A1_HUMAN Collagen alpha-1(VI) chain OS=Homo sapiens OX=9606 GN=COL6A1 PE=1 SV=3	1	6	6	6	4	4	4	5	6	5	4	4	4	5	6	5	4	4	4	5	6	5	6.8	6.8	6.8	108.53	1028	1028	0	10.323	By MS/MS	By MS/MS	By MS/MS	By MS/MS	By MS/MS	By MS/MS	4.6	4.3	5.2	6	6.8	6
P12111	P12111	2	2	2	Collagen alpha-3(VI) chain	COL6A3	sp|P12111|CO6A3_HUMAN Collagen alpha-3(VI) chain OS=Homo sapiens OX=9606 GN=COL6A3 PE=1 SV=5	1	2	2	2	1	2	1	2	1	2	1	2	1	2	1	2	1	2	1	2	1	2	0.8	0.8	0.8	343.67	3177	3177	0	6.6514	By matching	By MS/MS	By matching	By MS/MS	By MS/MS	By MS/MS	0.4	0.8	0.4	0.8	0.4	0.8
P12268;P20839	P12268	4;1	4;1	4;1	Inosine-5-monophosphate dehydrogenase 2	IMPDH2	sp|P12268|IMDH2_HUMAN Inosine-5-monophosphate dehydrogenase 2 OS=Homo sapiens OX=9606 GN=IMPDH2 PE=1 SV=2	2	4	4	4	4	3	3	2	2	4	4	3	3	2	2	4	4	3	3	2	2	4	9.5	9.5	9.5	55.804	514	514;514	0	10.091	By MS/MS	By MS/MS	By MS/MS	By MS/MS	By MS/MS	By MS/MS	9.5	8	7.2	5.1	5.1	9.5
P12273	P12273	4	4	4	Prolactin-inducible protein	PIP	sp|P12273|PIP_HUMAN Prolactin-inducible protein OS=Homo sapiens OX=9606 GN=PIP PE=1 SV=1	1	4	4	4	3	4	4	3	4	3	3	4	4	3	4	3	3	4	4	3	4	3	27.4	27.4	27.4	16.572	146	146	0	9.8291	By MS/MS	By MS/MS	By MS/MS	By MS/MS	By MS/MS	By MS/MS	27.4	27.4	27.4	27.4	27.4	14.4
P12277;P06732	P12277	13;2	13;2	13;2	Creatine kinase B-type	CKB	sp|P12277|KCRB_HUMAN Creatine kinase B-type OS=Homo sapiens OX=9606 GN=CKB PE=1 SV=1	2	13	13	13	11	11	10	11	12	12	11	11	10	11	12	12	11	11	10	11	12	12	43.3	43.3	43.3	42.644	381	381;381	0	265.79	By MS/MS	By MS/MS	By MS/MS	By MS/MS	By MS/MS	By MS/MS	40.4	35.7	38.3	40.4	43.3	43.3
P12429	P12429	22	22	22	Annexin A3	ANXA3	sp|P12429|ANXA3_HUMAN Annexin A3 OS=Homo sapiens OX=9606 GN=ANXA3 PE=1 SV=3	1	22	22	22	22	20	21	18	21	21	22	20	21	18	21	21	22	20	21	18	21	21	55.1	55.1	55.1	36.375	323	323	0	151.99	By MS/MS	By MS/MS	By MS/MS	By MS/MS	By MS/MS	By MS/MS	55.1	49.5	51.7	49.2	51.7	51.7
P12814;P35609	P12814	20;4	11;1	11;1	Alpha-actinin-1	ACTN1	sp|P12814|ACTN1_HUMAN Alpha-actinin-1 OS=Homo sapiens OX=9606 GN=ACTN1 PE=1 SV=2	2	20	11	11	18	20	17	16	18	19	11	11	11	10	10	10	11	11	11	10	10	10	27.8	17.8	17.8	103.06	892	892;894	0	119	By MS/MS	By MS/MS	By MS/MS	By MS/MS	By MS/MS	By MS/MS	25.9	27.8	24.6	23.4	25.2	26.7
P12821	P12821	21	21	21	Angiotensin-converting enzyme;Angiotensin-converting enzyme, soluble form	ACE	sp|P12821|ACE_HUMAN Angiotensin-converting enzyme OS=Homo sapiens OX=9606 GN=ACE PE=1 SV=1	1	21	21	21	20	19	19	19	20	19	20	19	19	19	20	19	20	19	19	19	20	19	19.8	19.8	19.8	149.71	1306	1306	0	221.42	By MS/MS	By MS/MS	By MS/MS	By MS/MS	By MS/MS	By MS/MS	19.5	17.8	18.1	18.1	18.3	18.1
P12830	P12830	3	3	3	Cadherin-1;E-Cad/CTF1;E-Cad/CTF2;E-Cad/CTF3	CDH1	sp|P12830|CADH1_HUMAN Cadherin-1 OS=Homo sapiens OX=9606 GN=CDH1 PE=1 SV=3	1	3	3	3	3	3	3	2	2	3	3	3	3	2	2	3	3	3	3	2	2	3	4.9	4.9	4.9	97.455	882	882	0	6.3432	By MS/MS	By MS/MS	By MS/MS	By MS/MS	By MS/MS	By MS/MS	4.9	4.9	4.9	2.4	2.4	4.9
P12931;Q9H3Y6;P08581;Q04912	P12931	18;1;1;1	17;0;0;0	12;0;0;0	Proto-oncogene tyrosine-protein kinase Src	SRC	sp|P12931|SRC_HUMAN Proto-oncogene tyrosine-protein kinase Src OS=Homo sapiens OX=9606 GN=SRC PE=1 SV=3	4	18	17	12	16	14	17	15	16	17	15	13	16	14	15	16	10	8	11	9	10	11	35.8	34.3	26.3	59.834	536	536;488;1390;1400	0	94.074	By MS/MS	By MS/MS	By MS/MS	By MS/MS	By MS/MS	By MS/MS	32.1	29.1	34.1	32.3	32.3	33.8
P12955	P12955	12	12	12	Xaa-Pro dipeptidase	PEPD	sp|P12955|PEPD_HUMAN Xaa-Pro dipeptidase OS=Homo sapiens OX=9606 GN=PEPD PE=1 SV=3	1	12	12	12	11	11	10	12	11	11	11	11	10	12	11	11	11	11	10	12	11	11	26.8	26.8	26.8	54.548	493	493	0	29.647	By MS/MS	By MS/MS	By MS/MS	By MS/MS	By MS/MS	By MS/MS	22.7	22.7	20.7	26.8	22.7	22.7
P13473	P13473	7	7	7	Lysosome-associated membrane glycoprotein 2	LAMP2	sp|P13473|LAMP2_HUMAN Lysosome-associated membrane glycoprotein 2 OS=Homo sapiens OX=9606 GN=LAMP2 PE=1 SV=2	1	7	7	7	7	7	7	7	7	7	7	7	7	7	7	7	7	7	7	7	7	7	16.1	16.1	16.1	44.96	410	410	0	39.868	By MS/MS	By MS/MS	By MS/MS	By MS/MS	By MS/MS	By MS/MS	16.1	16.1	16.1	16.1	16.1	16.1
P13489	P13489	14	14	14	Ribonuclease inhibitor	RNH1	sp|P13489|RINI_HUMAN Ribonuclease inhibitor OS=Homo sapiens OX=9606 GN=RNH1 PE=1 SV=2	1	14	14	14	14	14	13	14	14	14	14	14	13	14	14	14	14	14	13	14	14	14	36	36	36	49.973	461	461	0	128.92	By MS/MS	By MS/MS	By MS/MS	By MS/MS	By MS/MS	By MS/MS	36	36	34.1	36	36	36
P13498	P13498	1	1	1	Cytochrome b-245 light chain	CYBA	sp|P13498|CY24A_HUMAN Cytochrome b-245 light chain OS=Homo sapiens OX=9606 GN=CYBA PE=1 SV=3	1	1	1	1	1	1	1	1	0	0	1	1	1	1	0	0	1	1	1	1	0	0	15.9	15.9	15.9	21.012	195	195	0	10.831	By MS/MS	By MS/MS	By MS/MS	By matching			15.9	15.9	15.9	15.9	0	0
P13639	P13639	33	33	33	Elongation factor 2	EEF2	sp|P13639|EF2_HUMAN Elongation factor 2 OS=Homo sapiens OX=9606 GN=EEF2 PE=1 SV=4	1	33	33	33	32	29	27	27	29	29	32	29	27	27	29	29	32	29	27	27	29	29	37.3	37.3	37.3	95.337	858	858	0	116.66	By MS/MS	By MS/MS	By MS/MS	By MS/MS	By MS/MS	By MS/MS	35.9	34	30.1	30.5	33.1	32.3
P13671	P13671	2	2	2	Complement component C6	C6	sp|P13671|CO6_HUMAN Complement component C6 OS=Homo sapiens OX=9606 GN=C6 PE=1 SV=3	1	2	2	2	0	0	0	1	2	1	0	0	0	1	2	1	0	0	0	1	2	1	2.6	2.6	2.6	104.79	934	934	0	9.091				By MS/MS	By MS/MS	By MS/MS	0	0	0	1.5	2.6	1.5
P13686	P13686	1	1	1	Tartrate-resistant acid phosphatase type 5	ACP5	sp|P13686|PPA5_HUMAN Tartrate-resistant acid phosphatase type 5 OS=Homo sapiens OX=9606 GN=ACP5 PE=1 SV=3	1	1	1	1	1	1	0	0	0	0	1	1	0	0	0	0	1	1	0	0	0	0	3.7	3.7	3.7	36.598	325	325	0.0035778	1.9637	By MS/MS	By matching					3.7	3.7	0	0	0	0
P13688	P13688	4	3	3	Carcinoembryonic antigen-related cell adhesion molecule 1	CEACAM1	sp|P13688|CEAM1_HUMAN Carcinoembryonic antigen-related cell adhesion molecule 1 OS=Homo sapiens OX=9606 GN=CEACAM1 PE=1 SV=2	1	4	3	3	4	2	3	4	3	4	3	1	2	3	2	3	3	1	2	3	2	3	12.7	11	11	57.56	526	526	0.00083963	3.7733	By MS/MS	By MS/MS	By MS/MS	By MS/MS	By MS/MS	By MS/MS	12.7	4.2	9.5	12.7	9.5	12.7
P13693;Q56UQ5	P13693;Q56UQ5	5;3	5;3	5;3	Translationally-controlled tumor protein;TPT1-like protein	TPT1	sp|P13693|TCTP_HUMAN Translationally-controlled tumor protein OS=Homo sapiens OX=9606 GN=TPT1 PE=1 SV=1;sp|Q56UQ5|TPT1L_HUMAN TPT1-like protein OS=Homo sapiens OX=9606 PE=2 SV=2	2	5	5	5	5	5	5	5	5	5	5	5	5	5	5	5	5	5	5	5	5	5	28.5	28.5	28.5	19.595	172	172;140	0	63.681	By MS/MS	By MS/MS	By MS/MS	By MS/MS	By MS/MS	By MS/MS	28.5	28.5	28.5	28.5	28.5	28.5
P13716	P13716	6	6	6	Delta-aminolevulinic acid dehydratase	ALAD	sp|P13716|HEM2_HUMAN Delta-aminolevulinic acid dehydratase OS=Homo sapiens OX=9606 GN=ALAD PE=1 SV=1	1	6	6	6	5	6	6	5	5	6	5	6	6	5	5	6	5	6	6	5	5	6	21.2	21.2	21.2	36.294	330	330	0	18.294	By MS/MS	By MS/MS	By MS/MS	By MS/MS	By MS/MS	By MS/MS	17.9	21.2	21.2	18.5	18.5	21.2
P13726	P13726	8	8	8	Tissue factor	F3	sp|P13726|TF_HUMAN Tissue factor OS=Homo sapiens OX=9606 GN=F3 PE=1 SV=1	1	8	8	8	6	5	6	6	8	6	6	5	6	6	8	6	6	5	6	6	8	6	29.2	29.2	29.2	33.067	295	295	0	57.732	By MS/MS	By MS/MS	By MS/MS	By MS/MS	By MS/MS	By MS/MS	24.1	21.4	24.1	24.1	29.2	24.1
P13747	P13747	8	7	7	HLA class I histocompatibility antigen, alpha chain E	HLA-E	sp|P13747|HLAE_HUMAN HLA class I histocompatibility antigen, alpha chain E OS=Homo sapiens OX=9606 GN=HLA-E PE=1 SV=4	1	8	7	7	4	5	5	7	7	7	3	4	4	6	6	6	3	4	4	6	6	6	27.1	23.5	23.5	40.057	358	358	0	79.718	By MS/MS	By MS/MS	By MS/MS	By MS/MS	By MS/MS	By MS/MS	15.6	18.4	18.4	23.5	23.5	24.3
P13762	P13762	1	1	1	HLA class II histocompatibility antigen, DR beta 4 chain	HLA-DRB4	sp|P13762|DRB4_HUMAN HLA class II histocompatibility antigen, DR beta 4 chain OS=Homo sapiens OX=9606 GN=HLA-DRB4 PE=1 SV=2	1	1	1	1	1	1	1	0	0	0	1	1	1	0	0	0	1	1	1	0	0	0	3.8	3.8	3.8	29.941	266	266	0.0011494	2.6117	By MS/MS	By MS/MS	By MS/MS				3.8	3.8	3.8	0	0	0
P13796	P13796	20	15	15	Plastin-2	LCP1	sp|P13796|PLSL_HUMAN Plastin-2 OS=Homo sapiens OX=9606 GN=LCP1 PE=1 SV=6	1	20	15	15	19	19	20	16	17	17	14	14	15	11	12	13	14	14	15	11	12	13	34	27	27	70.288	627	627	0	157.34	By MS/MS	By MS/MS	By MS/MS	By MS/MS	By MS/MS	By MS/MS	34	34	34	29.7	32.1	34
P13797	P13797	25	25	18	Plastin-3	PLS3	sp|P13797|PLST_HUMAN Plastin-3 OS=Homo sapiens OX=9606 GN=PLS3 PE=1 SV=4	1	25	25	18	23	23	24	24	25	24	23	23	24	24	25	24	16	16	17	17	18	18	43.5	43.5	32.4	70.81	630	630	0	238.68	By MS/MS	By MS/MS	By MS/MS	By MS/MS	By MS/MS	By MS/MS	38.9	42.4	42.4	42.4	43.5	43.5
P13798	P13798	12	12	12	Acylamino-acid-releasing enzyme	APEH	sp|P13798|ACPH_HUMAN Acylamino-acid-releasing enzyme OS=Homo sapiens OX=9606 GN=APEH PE=1 SV=4	1	12	12	12	12	8	9	9	9	9	12	8	9	9	9	9	12	8	9	9	9	9	19.4	19.4	19.4	81.224	732	732	0	35.53	By MS/MS	By MS/MS	By MS/MS	By MS/MS	By MS/MS	By MS/MS	19.4	10.9	13.5	15.3	13.4	13.4
P13861	P13861	14	14	12	cAMP-dependent protein kinase type II-alpha regulatory subunit	PRKAR2A	sp|P13861|KAP2_HUMAN cAMP-dependent protein kinase type II-alpha regulatory subunit OS=Homo sapiens OX=9606 GN=PRKAR2A PE=1 SV=2	1	14	14	12	14	14	13	12	12	12	14	14	13	12	12	12	12	12	11	10	10	10	42.1	42.1	35.4	45.518	404	404	0	79.822	By MS/MS	By MS/MS	By MS/MS	By MS/MS	By MS/MS	By MS/MS	42.1	42.1	40.3	36.6	36.6	36.6
P13866	P13866	10	10	10	Sodium/glucose cotransporter 1	SLC5A1	sp|P13866|SC5A1_HUMAN Sodium/glucose cotransporter 1 OS=Homo sapiens OX=9606 GN=SLC5A1 PE=1 SV=1	1	10	10	10	9	10	10	8	9	8	9	10	10	8	9	8	9	10	10	8	9	8	12.8	12.8	12.8	73.497	664	664	0	187.04	By MS/MS	By MS/MS	By MS/MS	By MS/MS	By MS/MS	By MS/MS	10.5	12.8	12.8	11.3	12.8	11
Q5VT79;P13928	Q5VT79;P13928	2;2	2;2	2;2	Annexin A8-like protein 2;Annexin A8	ANXA8L2;ANXA8	sp|Q5VT79|AXA81_HUMAN Annexin A8-like protein 1 OS=Homo sapiens OX=9606 GN=ANXA8L1 PE=2 SV=2;sp|P13928|ANXA8_HUMAN Annexin A8 OS=Homo sapiens OX=9606 GN=ANXA8 PE=1 SV=3	2	2	2	2	2	0	1	1	1	1	2	0	1	1	1	1	2	0	1	1	1	1	9.5	9.5	9.5	36.879	327	327;327	0	5.4747	By MS/MS		By MS/MS	By matching	By MS/MS	By MS/MS	9.5	0	4.6	4.6	4.6	4.6
P13987	P13987	5	5	5	CD59 glycoprotein	CD59	sp|P13987|CD59_HUMAN CD59 glycoprotein OS=Homo sapiens OX=9606 GN=CD59 PE=1 SV=1	1	5	5	5	5	5	5	5	5	5	5	5	5	5	5	5	5	5	5	5	5	5	37.5	37.5	37.5	14.177	128	128	0	38.164	By MS/MS	By MS/MS	By MS/MS	By MS/MS	By MS/MS	By MS/MS	37.5	37.5	37.5	37.5	37.5	37.5
P14174	P14174	3	3	3	Macrophage migration inhibitory factor	MIF	sp|P14174|MIF_HUMAN Macrophage migration inhibitory factor OS=Homo sapiens OX=9606 GN=MIF PE=1 SV=4	1	3	3	3	3	3	3	3	3	3	3	3	3	3	3	3	3	3	3	3	3	3	23.5	23.5	23.5	12.476	115	115	0	9.0971	By MS/MS	By MS/MS	By MS/MS	By MS/MS	By MS/MS	By MS/MS	23.5	23.5	23.5	23.5	23.5	23.5
P14209	P14209	2	2	2	CD99 antigen	CD99	sp|P14209|CD99_HUMAN CD99 antigen OS=Homo sapiens OX=9606 GN=CD99 PE=1 SV=1	1	2	2	2	1	0	1	2	2	1	1	0	1	2	2	1	1	0	1	2	2	1	24.3	24.3	24.3	18.848	185	185	0	75.295	By matching		By MS/MS	By MS/MS	By MS/MS	By MS/MS	16.8	0	7.6	24.3	24.3	16.8
P14324	P14324	5	5	5	Farnesyl pyrophosphate synthase	FDPS	sp|P14324|FPPS_HUMAN Farnesyl pyrophosphate synthase OS=Homo sapiens OX=9606 GN=FDPS PE=1 SV=4	1	5	5	5	5	4	5	4	4	3	5	4	5	4	4	3	5	4	5	4	4	3	14.3	14.3	14.3	48.275	419	419	0	16.642	By MS/MS	By MS/MS	By MS/MS	By MS/MS	By MS/MS	By MS/MS	14.3	11.5	14.3	11.7	11.7	8.8
P14384	P14384	11	11	11	Carboxypeptidase M	CPM	sp|P14384|CBPM_HUMAN Carboxypeptidase M OS=Homo sapiens OX=9606 GN=CPM PE=1 SV=2	1	11	11	11	11	10	11	10	9	9	11	10	11	10	9	9	11	10	11	10	9	9	24.8	24.8	24.8	50.513	443	443	0	39.896	By MS/MS	By MS/MS	By MS/MS	By MS/MS	By MS/MS	By MS/MS	24.8	24.8	24.8	22.8	22.8	22.8
P14410	P14410	15	15	15	Sucrase-isomaltase, intestinal;Sucrase;Isomaltase	SI	sp|P14410|SUIS_HUMAN Sucrase-isomaltase, intestinal OS=Homo sapiens OX=9606 GN=SI PE=1 SV=6	1	15	15	15	8	9	8	12	14	12	8	9	8	12	14	12	8	9	8	12	14	12	10.5	10.5	10.5	209.45	1827	1827	0	49.325	By MS/MS	By MS/MS	By MS/MS	By MS/MS	By MS/MS	By MS/MS	5.5	6.9	5.9	8.3	9.6	9
P14543	P14543	2	2	2	Nidogen-1	NID1	sp|P14543|NID1_HUMAN Nidogen-1 OS=Homo sapiens OX=9606 GN=NID1 PE=1 SV=3	1	2	2	2	1	0	0	1	2	2	1	0	0	1	2	2	1	0	0	1	2	2	1.7	1.7	1.7	136.38	1247	1247	0.0011802	2.937	By MS/MS			By MS/MS	By MS/MS	By MS/MS	0.6	0	0	1.1	1.7	1.7
P14550	P14550	15	15	15	Alcohol dehydrogenase [NADP(+)]	AKR1A1	sp|P14550|AK1A1_HUMAN Aldo-keto reductase family 1 member A1 OS=Homo sapiens OX=9606 GN=AKR1A1 PE=1 SV=3	1	15	15	15	14	14	15	14	14	15	14	14	15	14	14	15	14	14	15	14	14	15	49.5	49.5	49.5	36.573	325	325	0	174.73	By MS/MS	By MS/MS	By MS/MS	By MS/MS	By MS/MS	By MS/MS	49.5	49.5	49.5	49.5	49.5	49.5
P14555	P14555	6	6	6	Phospholipase A2, membrane associated	PLA2G2A	sp|P14555|PA2GA_HUMAN Phospholipase A2, membrane associated OS=Homo sapiens OX=9606 GN=PLA2G2A PE=1 SV=2	1	6	6	6	6	6	5	2	3	3	6	6	5	2	3	3	6	6	5	2	3	3	38.9	38.9	38.9	16.083	144	144	0	13.076	By MS/MS	By MS/MS	By MS/MS	By MS/MS	By MS/MS	By MS/MS	38.9	38.9	34	11.1	21.5	21.5
P14618	P14618	29	29	28	Pyruvate kinase PKM	PKM	sp|P14618|KPYM_HUMAN Pyruvate kinase PKM OS=Homo sapiens OX=9606 GN=PKM PE=1 SV=4	1	29	29	28	28	28	27	28	29	27	28	28	27	28	29	27	27	27	26	27	28	26	58.8	58.8	56.7	57.936	531	531	0	272.48	By MS/MS	By MS/MS	By MS/MS	By MS/MS	By MS/MS	By MS/MS	55.7	58.2	55.2	58.8	58.8	57.3
P14625	P14625	3	3	3	Endoplasmin	HSP90B1	sp|P14625|ENPL_HUMAN Endoplasmin OS=Homo sapiens OX=9606 GN=HSP90B1 PE=1 SV=1	1	3	3	3	3	3	3	2	3	3	3	3	3	2	3	3	3	3	3	2	3	3	4.7	4.7	4.7	92.468	803	803	0	4.7683	By MS/MS	By MS/MS	By MS/MS	By MS/MS	By MS/MS	By MS/MS	4.7	4.7	4.7	3.1	4.7	4.7
P14735	P14735	3	3	3	Insulin-degrading enzyme	IDE	sp|P14735|IDE_HUMAN Insulin-degrading enzyme OS=Homo sapiens OX=9606 GN=IDE PE=1 SV=4	1	3	3	3	3	2	2	2	2	3	3	2	2	2	2	3	3	2	2	2	2	3	3.1	3.1	3.1	117.97	1019	1019	0	4.379	By MS/MS	By MS/MS	By MS/MS	By MS/MS	By MS/MS	By MS/MS	3.1	2.4	2.4	2.4	2.4	3.1
P14868	P14868	5	5	5	Aspartate--tRNA ligase, cytoplasmic	DARS	sp|P14868|SYDC_HUMAN Aspartate--tRNA ligase, cytoplasmic OS=Homo sapiens OX=9606 GN=DARS1 PE=1 SV=2	1	5	5	5	4	5	5	3	1	3	4	5	5	3	1	3	4	5	5	3	1	3	13.4	13.4	13.4	57.136	501	501	0	10.478	By MS/MS	By MS/MS	By MS/MS	By MS/MS	By MS/MS	By MS/MS	11	13.4	13.4	8.4	2	6.4
P14921	P14921	1	1	1	Protein C-ets-1	ETS1	sp|P14921|ETS1_HUMAN Protein C-ets-1 OS=Homo sapiens OX=9606 GN=ETS1 PE=1 SV=1	1	1	1	1	1	1	1	1	1	1	1	1	1	1	1	1	1	1	1	1	1	1	2.9	2.9	2.9	50.407	441	441	1	-2	By MS/MS	By matching	By MS/MS	By matching	By matching	By MS/MS	2.9	2.9	2.9	2.9	2.9	2.9
P14923	P14923	21	21	20	Junction plakoglobin	JUP	sp|P14923|PLAK_HUMAN Junction plakoglobin OS=Homo sapiens OX=9606 GN=JUP PE=1 SV=3	1	21	21	20	12	11	11	21	19	19	12	11	11	21	19	19	11	10	10	20	18	18	40.8	40.8	39.1	81.744	745	745	0	162.06	By MS/MS	By MS/MS	By MS/MS	By MS/MS	By MS/MS	By MS/MS	21.6	16.4	16.9	40.8	36	35.2
P15104	P15104	1	1	1	Glutamine synthetase	GLUL	sp|P15104|GLNA_HUMAN Glutamine synthetase OS=Homo sapiens OX=9606 GN=GLUL PE=1 SV=4	1	1	1	1	1	1	1	1	1	1	1	1	1	1	1	1	1	1	1	1	1	1	4	4	4	42.064	373	373	0	24.453	By MS/MS	By matching	By matching	By MS/MS	By MS/MS	By MS/MS	4	4	4	4	4	4
P15121;C9JRZ8	P15121	12;1	12;1	12;1	Aldose reductase	AKR1B1	sp|P15121|ALDR_HUMAN Aldo-keto reductase family 1 member B1 OS=Homo sapiens OX=9606 GN=AKR1B1 PE=1 SV=3	2	12	12	12	11	12	11	12	12	11	11	12	11	12	12	11	11	12	11	12	12	11	40.2	40.2	40.2	35.853	316	316;316	0	186.15	By MS/MS	By MS/MS	By MS/MS	By MS/MS	By MS/MS	By MS/MS	36.4	40.2	36.4	40.2	40.2	37.7
P15144	P15144	37	37	37	Aminopeptidase N	ANPEP	sp|P15144|AMPN_HUMAN Aminopeptidase N OS=Homo sapiens OX=9606 GN=ANPEP PE=1 SV=4	1	37	37	37	36	35	36	35	35	36	36	35	36	35	35	36	36	35	36	35	35	36	30.2	30.2	30.2	109.54	967	967	0	323.31	By MS/MS	By MS/MS	By MS/MS	By MS/MS	By MS/MS	By MS/MS	29.5	30.1	30.1	29.4	29.4	30.1
P15151	P15151	2	2	2	Poliovirus receptor	PVR	sp|P15151|PVR_HUMAN Poliovirus receptor OS=Homo sapiens OX=9606 GN=PVR PE=1 SV=2	1	2	2	2	2	1	2	2	2	1	2	1	2	2	2	1	2	1	2	2	2	1	8.2	8.2	8.2	45.302	417	417	0	92.68	By matching	By matching	By MS/MS	By MS/MS	By MS/MS	By MS/MS	8.2	5.3	8.2	8.2	8.2	5.3
P15153;Q9H4E5	P15153	8;1	2;0	2;0	Ras-related C3 botulinum toxin substrate 2	RAC2	sp|P15153|RAC2_HUMAN Ras-related C3 botulinum toxin substrate 2 OS=Homo sapiens OX=9606 GN=RAC2 PE=1 SV=1	2	8	2	2	8	8	8	7	7	8	2	2	2	2	2	2	2	2	2	2	2	2	35.9	14.6	14.6	21.429	192	192;214	0.001165	2.7727	By MS/MS	By MS/MS	By MS/MS	By MS/MS	By MS/MS	By MS/MS	35.9	35.9	35.9	31.8	31.8	35.9
P15170;Q8IYD1	P15170;Q8IYD1	13;7	13;7	13;7	Eukaryotic peptide chain release factor GTP-binding subunit ERF3A;Eukaryotic peptide chain release factor GTP-binding subunit ERF3B	GSPT1;GSPT2	sp|P15170|ERF3A_HUMAN Eukaryotic peptide chain release factor GTP-binding subunit ERF3A OS=Homo sapiens OX=9606 GN=GSPT1 PE=1 SV=1;sp|Q8IYD1|ERF3B_HUMAN Eukaryotic peptide chain release factor GTP-binding subunit ERF3B OS=Homo sapiens OX=9606 GN=GSPT2 PE=1	2	13	13	13	11	9	13	8	9	10	11	9	13	8	9	10	11	9	13	8	9	10	27.1	27.1	27.1	55.755	499	499;628	0	48.254	By MS/MS	By MS/MS	By MS/MS	By MS/MS	By MS/MS	By MS/MS	26.9	19.6	27.1	19.2	19.6	21.8
P15259	P15259	5	1	1	Phosphoglycerate mutase 2	PGAM2	sp|P15259|PGAM2_HUMAN Phosphoglycerate mutase 2 OS=Homo sapiens OX=9606 GN=PGAM2 PE=1 SV=3	1	5	1	1	4	4	3	5	5	5	0	0	0	1	1	1	0	0	0	1	1	1	16.6	3.6	3.6	28.766	253	253	1	-2	By matching	By matching	By matching	By matching	By matching	By MS/MS	13	13	13	16.6	16.6	16.6
P15260	P15260	4	4	4	Interferon gamma receptor 1	IFNGR1	sp|P15260|INGR1_HUMAN Interferon gamma receptor 1 OS=Homo sapiens OX=9606 GN=IFNGR1 PE=1 SV=1	1	4	4	4	3	2	1	4	3	2	3	2	1	4	3	2	3	2	1	4	3	2	10.2	10.2	10.2	54.404	489	489	0	6.6799	By MS/MS	By MS/MS	By matching	By MS/MS	By MS/MS	By MS/MS	8	5.3	2.2	10.2	8	4.9
P15289	P15289	1	1	1	Arylsulfatase A;Arylsulfatase A component B;Arylsulfatase A component C	ARSA	sp|P15289|ARSA_HUMAN Arylsulfatase A OS=Homo sapiens OX=9606 GN=ARSA PE=1 SV=3	1	1	1	1	1	1	1	0	0	0	1	1	1	0	0	0	1	1	1	0	0	0	3.2	3.2	3.2	53.588	507	507	0.0074906	1.4831	By MS/MS	By MS/MS	By MS/MS				3.2	3.2	3.2	0	0	0
P15291	P15291	2	2	2	Beta-1,4-galactosyltransferase 1;Lactose synthase A protein;N-acetyllactosamine synthase;Beta-N-acetylglucosaminylglycopeptide beta-1,4-galactosyltransferase;Beta-N-acetylglucosaminyl-glycolipid beta-1,4-galactosyltransferase;Processed beta-1,4-galactosyltransferase 1	B4GALT1	sp|P15291|B4GT1_HUMAN Beta-1,4-galactosyltransferase 1 OS=Homo sapiens OX=9606 GN=B4GALT1 PE=1 SV=5	1	2	2	2	2	2	2	2	2	2	2	2	2	2	2	2	2	2	2	2	2	2	4.8	4.8	4.8	43.92	398	398	0	4.6059	By MS/MS	By MS/MS	By MS/MS	By MS/MS	By matching	By MS/MS	4.8	4.8	4.8	4.8	4.8	4.8
P15309	P15309	10	10	10	Prostatic acid phosphatase;PAPf39	ACPP	sp|P15309|PPAP_HUMAN Prostatic acid phosphatase OS=Homo sapiens OX=9606 GN=ACP3 PE=1 SV=3	1	10	10	10	8	9	10	8	9	10	8	9	10	8	9	10	8	9	10	8	9	10	32.1	32.1	32.1	44.566	386	386	0	77.538	By MS/MS	By MS/MS	By MS/MS	By MS/MS	By MS/MS	By MS/MS	28.5	30.3	32.1	24.4	30.3	32.1
P15311	P15311	46	35	34	Ezrin	EZR	sp|P15311|EZRI_HUMAN Ezrin OS=Homo sapiens OX=9606 GN=EZR PE=1 SV=4	1	46	35	34	44	45	43	42	45	43	34	35	32	31	34	32	33	34	31	30	33	31	57.3	43.5	42.3	69.412	586	586	0	177.65	By MS/MS	By MS/MS	By MS/MS	By MS/MS	By MS/MS	By MS/MS	57.3	57.3	53.1	52.4	54.4	51.7
P15313	P15313	20	20	15	V-type proton ATPase subunit B, kidney isoform	ATP6V1B1	sp|P15313|VATB1_HUMAN V-type proton ATPase subunit B, kidney isoform OS=Homo sapiens OX=9606 GN=ATP6V1B1 PE=1 SV=3	1	20	20	15	18	19	18	19	19	17	18	19	18	19	19	17	13	14	13	14	14	12	44.1	44.1	32.7	56.832	513	513	0	97.114	By MS/MS	By MS/MS	By MS/MS	By MS/MS	By MS/MS	By MS/MS	38.4	41.9	38.4	41.9	40.5	36.1
P15328	P15328	8	8	8	Folate receptor alpha	FOLR1	sp|P15328|FOLR1_HUMAN Folate receptor alpha OS=Homo sapiens OX=9606 GN=FOLR1 PE=1 SV=3	1	8	8	8	8	8	8	8	8	8	8	8	8	8	8	8	8	8	8	8	8	8	32.7	32.7	32.7	29.819	257	257	0	154.32	By MS/MS	By MS/MS	By MS/MS	By MS/MS	By MS/MS	By MS/MS	32.7	32.7	32.7	32.7	32.7	32.7
P15374	P15374	9	9	9	Ubiquitin carboxyl-terminal hydrolase isozyme L3	UCHL3	sp|P15374|UCHL3_HUMAN Ubiquitin carboxyl-terminal hydrolase isozyme L3 OS=Homo sapiens OX=9606 GN=UCHL3 PE=1 SV=1	1	9	9	9	9	7	9	7	8	7	9	7	9	7	8	7	9	7	9	7	8	7	41.7	41.7	41.7	26.182	230	230	0	31.545	By MS/MS	By MS/MS	By MS/MS	By MS/MS	By MS/MS	By MS/MS	41.7	36.1	41.7	36.1	36.1	36.1
P15428	P15428	11	11	11	15-hydroxyprostaglandin dehydrogenase [NAD(+)]	HPGD	sp|P15428|PGDH_HUMAN 15-hydroxyprostaglandin dehydrogenase [NAD(+)] OS=Homo sapiens OX=9606 GN=HPGD PE=1 SV=1	1	11	11	11	10	9	9	11	10	10	10	9	9	11	10	10	10	9	9	11	10	10	49.6	49.6	49.6	28.977	266	266	0	98.566	By MS/MS	By MS/MS	By MS/MS	By MS/MS	By MS/MS	By MS/MS	47	41.7	44	49.6	47	44.4
P15529	P15529	4	4	4	Membrane cofactor protein	CD46	sp|P15529|MCP_HUMAN Membrane cofactor protein OS=Homo sapiens OX=9606 GN=CD46 PE=1 SV=3	1	4	4	4	2	2	1	1	3	4	2	2	1	1	3	4	2	2	1	1	3	4	8.4	8.4	8.4	43.747	392	392	0	4.7457	By MS/MS	By MS/MS	By MS/MS	By MS/MS	By MS/MS	By MS/MS	5.1	5.1	2	2	7.7	8.4
P15531	P15531	8	8	3	Nucleoside diphosphate kinase A	NME1	sp|P15531|NDKA_HUMAN Nucleoside diphosphate kinase A OS=Homo sapiens OX=9606 GN=NME1 PE=1 SV=1	1	8	8	3	7	6	6	5	7	7	7	6	6	5	7	7	3	3	2	2	2	2	50.7	50.7	20.4	17.149	152	152	0	61.085	By MS/MS	By MS/MS	By MS/MS	By MS/MS	By MS/MS	By MS/MS	42.8	37.5	40.8	32.9	46.1	46.1
P15559	P15559	5	5	5	NAD(P)H dehydrogenase [quinone] 1	NQO1	sp|P15559|NQO1_HUMAN NAD(P)H dehydrogenase [quinone] 1 OS=Homo sapiens OX=9606 GN=NQO1 PE=1 SV=1	1	5	5	5	5	4	3	4	4	4	5	4	3	4	4	4	5	4	3	4	4	4	20.4	20.4	20.4	30.867	274	274	0	12.288	By MS/MS	By MS/MS	By MS/MS	By MS/MS	By MS/MS	By MS/MS	20.4	16.8	13.9	17.2	17.2	17.2
P15586	P15586	7	7	7	N-acetylglucosamine-6-sulfatase	GNS	sp|P15586|GNS_HUMAN N-acetylglucosamine-6-sulfatase OS=Homo sapiens OX=9606 GN=GNS PE=1 SV=3	1	7	7	7	6	7	7	6	5	6	6	7	7	6	5	6	6	7	7	6	5	6	13.2	13.2	13.2	62.081	552	552	0	24.421	By MS/MS	By MS/MS	By MS/MS	By MS/MS	By MS/MS	By MS/MS	11.6	13.2	13.2	11.6	9.2	11.6
P15848	P15848	7	7	7	Arylsulfatase B	ARSB	sp|P15848|ARSB_HUMAN Arylsulfatase B OS=Homo sapiens OX=9606 GN=ARSB PE=1 SV=1	1	7	7	7	7	6	7	4	5	4	7	6	7	4	5	4	7	6	7	4	5	4	15.4	15.4	15.4	59.687	533	533	0	17.613	By MS/MS	By MS/MS	By MS/MS	By MS/MS	By MS/MS	By MS/MS	15.4	12.4	15.4	8.4	10.5	6.9
P15880	P15880	3	3	3	40S ribosomal protein S2	RPS2	sp|P15880|RS2_HUMAN 40S ribosomal protein S2 OS=Homo sapiens OX=9606 GN=RPS2 PE=1 SV=2	1	3	3	3	2	2	2	3	3	3	2	2	2	3	3	3	2	2	2	3	3	3	10.6	10.6	10.6	31.324	293	293	0	4.7583	By MS/MS	By MS/MS	By MS/MS	By MS/MS	By MS/MS	By MS/MS	7.8	7.8	7.8	10.6	10.6	10.6
P15924	P15924	63	63	63	Desmoplakin	DSP	sp|P15924|DESP_HUMAN Desmoplakin OS=Homo sapiens OX=9606 GN=DSP PE=1 SV=3	1	63	63	63	32	26	22	54	52	53	32	26	22	54	52	53	32	26	22	54	52	53	22.6	22.6	22.6	331.77	2871	2871	0	285.83	By MS/MS	By MS/MS	By MS/MS	By MS/MS	By MS/MS	By MS/MS	12.4	9.6	7.6	19.9	18.5	19.1
P15941	P15941	9	9	9	Mucin-1;Mucin-1 subunit alpha;Mucin-1 subunit beta	MUC1	sp|P15941|MUC1_HUMAN Mucin-1 OS=Homo sapiens OX=9606 GN=MUC1 PE=1 SV=3	1	9	9	9	9	9	9	9	9	9	9	9	9	9	9	9	9	9	9	9	9	9	8.9	8.9	8.9	122.1	1255	1255	0	131.64	By MS/MS	By MS/MS	By MS/MS	By MS/MS	By MS/MS	By MS/MS	8.9	8.9	8.9	8.9	8.9	8.9
P16066;O75343;P20594;Q02846;P51841	P16066	7;1;1;1;1	7;1;1;1;1	6;0;0;0;0	Atrial natriuretic peptide receptor 1	NPR1	sp|P16066|ANPRA_HUMAN Atrial natriuretic peptide receptor 1 OS=Homo sapiens OX=9606 GN=NPR1 PE=1 SV=1	5	7	7	6	3	2	3	6	6	7	3	2	3	6	6	7	3	2	2	5	5	6	9.5	9.5	8.3	118.92	1061	1061;617;1047;1103;1108	0	16.319	By MS/MS	By MS/MS	By MS/MS	By MS/MS	By MS/MS	By MS/MS	4.7	4	5.2	8.7	8	9.5
P16070	P16070	3	3	3	CD44 antigen	CD44	sp|P16070|CD44_HUMAN CD44 antigen OS=Homo sapiens OX=9606 GN=CD44 PE=1 SV=3	1	3	3	3	1	1	2	1	3	2	1	1	2	1	3	2	1	1	2	1	3	2	4.9	4.9	4.9	81.537	742	742	0	39.304	By MS/MS	By MS/MS	By MS/MS	By MS/MS	By MS/MS	By MS/MS	2.2	2.2	3.5	1.3	4.9	3.5
P16083	P16083	7	7	7	Ribosyldihydronicotinamide dehydrogenase [quinone]	NQO2	sp|P16083|NQO2_HUMAN Ribosyldihydronicotinamide dehydrogenase [quinone] OS=Homo sapiens OX=9606 GN=NQO2 PE=1 SV=5	1	7	7	7	7	7	7	7	7	7	7	7	7	7	7	7	7	7	7	7	7	7	41.6	41.6	41.6	25.918	231	231	0	72.383	By MS/MS	By MS/MS	By MS/MS	By MS/MS	By MS/MS	By MS/MS	41.6	41.6	41.6	41.6	41.6	41.6
P16152	P16152	15	15	13	Carbonyl reductase [NADPH] 1	CBR1	sp|P16152|CBR1_HUMAN Carbonyl reductase [NADPH] 1 OS=Homo sapiens OX=9606 GN=CBR1 PE=1 SV=3	1	15	15	13	14	15	15	14	15	14	14	15	15	14	15	14	12	13	13	12	13	12	66.4	66.4	56	30.375	277	277	0	136.55	By MS/MS	By MS/MS	By MS/MS	By MS/MS	By MS/MS	By MS/MS	61.4	66.4	66.4	62.1	66.4	61.4
P16278	P16278	12	12	12	Beta-galactosidase	GLB1	sp|P16278|BGAL_HUMAN Beta-galactosidase OS=Homo sapiens OX=9606 GN=GLB1 PE=1 SV=2	1	12	12	12	11	12	12	10	11	11	11	12	12	10	11	11	11	12	12	10	11	11	21.6	21.6	21.6	76.074	677	677	0	50.491	By MS/MS	By MS/MS	By MS/MS	By MS/MS	By MS/MS	By MS/MS	20.4	21.6	21.6	18.8	20.4	20.4
P16333	P16333	6	5	5	Cytoplasmic protein NCK1	NCK1	sp|P16333|NCK1_HUMAN Cytoplasmic protein NCK1 OS=Homo sapiens OX=9606 GN=NCK1 PE=1 SV=1	1	6	5	5	5	3	5	4	5	4	4	2	4	3	4	3	4	2	4	3	4	3	14.6	12.5	12.5	42.864	377	377	0	15.315	By MS/MS	By MS/MS	By MS/MS	By MS/MS	By MS/MS	By MS/MS	14.3	8.8	14.3	11.9	11.9	11.9
P16401	P16401	4	2	2	Histone H1.5	HIST1H1B	sp|P16401|H15_HUMAN Histone H1.5 OS=Homo sapiens OX=9606 GN=H1-5 PE=1 SV=3	1	4	2	2	2	0	0	3	3	4	2	0	0	2	2	2	2	0	0	2	2	2	17.3	10.2	10.2	22.58	226	226	0	5.3064	By MS/MS			By MS/MS	By MS/MS	By MS/MS	10.2	0	0	13.3	14.2	17.3
P16422	P16422	1	1	1	Epithelial cell adhesion molecule	EPCAM	sp|P16422|EPCAM_HUMAN Epithelial cell adhesion molecule OS=Homo sapiens OX=9606 GN=EPCAM PE=1 SV=2	1	1	1	1	1	1	1	1	1	1	1	1	1	1	1	1	1	1	1	1	1	1	2.9	2.9	2.9	34.932	314	314	0.0075034	1.4892	By matching	By matching	By matching	By MS/MS	By matching	By matching	2.9	2.9	2.9	2.9	2.9	2.9
P16444	P16444	18	18	18	Dipeptidase 1	DPEP1	sp|P16444|DPEP1_HUMAN Dipeptidase 1 OS=Homo sapiens OX=9606 GN=DPEP1 PE=1 SV=3	1	18	18	18	17	17	17	18	17	17	17	17	17	18	17	17	17	17	17	18	17	17	50.4	50.4	50.4	45.673	411	411	0	311.43	By MS/MS	By MS/MS	By MS/MS	By MS/MS	By MS/MS	By MS/MS	48.4	48.4	48.4	50.4	48.4	48.4
P16455	P16455	1	1	1	Methylated-DNA--protein-cysteine methyltransferase	MGMT	sp|P16455|MGMT_HUMAN Methylated-DNA--protein-cysteine methyltransferase OS=Homo sapiens OX=9606 GN=MGMT PE=1 SV=1	1	1	1	1	1	1	0	1	0	1	1	1	0	1	0	1	1	1	0	1	0	1	8.7	8.7	8.7	21.646	207	207	0	9.2003	By matching	By matching		By matching		By MS/MS	8.7	8.7	0	8.7	0	8.7
P16671	P16671	1	1	1	Platelet glycoprotein 4	CD36	sp|P16671|CD36_HUMAN Platelet glycoprotein 4 OS=Homo sapiens OX=9606 GN=CD36 PE=1 SV=2	1	1	1	1	1	1	1	1	0	0	1	1	1	1	0	0	1	1	1	1	0	0	2.5	2.5	2.5	53.053	472	472	0.00081699	3.4856	By MS/MS	By MS/MS	By matching	By MS/MS			2.5	2.5	2.5	2.5	0	0
P16870	P16870	3	3	3	Carboxypeptidase E	CPE	sp|P16870|CBPE_HUMAN Carboxypeptidase E OS=Homo sapiens OX=9606 GN=CPE PE=1 SV=1	1	3	3	3	2	3	3	2	2	2	2	3	3	2	2	2	2	3	3	2	2	2	8.6	8.6	8.6	53.15	476	476	0	4.9206	By MS/MS	By MS/MS	By MS/MS	By MS/MS	By MS/MS	By MS/MS	4.8	8.6	8.6	4.8	4.8	4.8
P16885	P16885	27	27	26	1-phosphatidylinositol 4,5-bisphosphate phosphodiesterase gamma-2	PLCG2	sp|P16885|PLCG2_HUMAN 1-phosphatidylinositol 4,5-bisphosphate phosphodiesterase gamma-2 OS=Homo sapiens OX=9606 GN=PLCG2 PE=1 SV=4	1	27	27	26	25	25	27	25	23	24	25	25	27	25	23	24	24	24	26	24	22	23	22.4	22.4	21.8	147.87	1265	1265	0	122.19	By MS/MS	By MS/MS	By MS/MS	By MS/MS	By MS/MS	By MS/MS	18.8	19.6	22.4	20.3	18.9	19.1
P16930	P16930	6	6	6	Fumarylacetoacetase	FAH	sp|P16930|FAAA_HUMAN Fumarylacetoacetase OS=Homo sapiens OX=9606 GN=FAH PE=1 SV=2	1	6	6	6	5	4	6	5	5	6	5	4	6	5	5	6	5	4	6	5	5	6	14.3	14.3	14.3	46.374	419	419	0	21.322	By MS/MS	By MS/MS	By MS/MS	By MS/MS	By MS/MS	By MS/MS	12.2	9.8	14.3	11.9	11.9	14.3
P16949;Q93045	P16949;Q93045	1;1	1;1	1;1	Stathmin;Stathmin-2	STMN1;STMN2	sp|P16949|STMN1_HUMAN Stathmin OS=Homo sapiens OX=9606 GN=STMN1 PE=1 SV=3;sp|Q93045|STMN2_HUMAN Stathmin-2 OS=Homo sapiens OX=9606 GN=STMN2 PE=1 SV=3	2	1	1	1	1	1	1	1	1	1	1	1	1	1	1	1	1	1	1	1	1	1	6	6	6	17.302	149	149;179	0.0035689	1.9447	By MS/MS	By MS/MS	By MS/MS	By MS/MS	By MS/MS	By MS/MS	6	6	6	6	6	6
P17050	P17050	4	4	4	Alpha-N-acetylgalactosaminidase	NAGA	sp|P17050|NAGAB_HUMAN Alpha-N-acetylgalactosaminidase OS=Homo sapiens OX=9606 GN=NAGA PE=1 SV=2	1	4	4	4	4	4	4	2	3	3	4	4	4	2	3	3	4	4	4	2	3	3	12.4	12.4	12.4	46.564	411	411	0	37.451	By MS/MS	By MS/MS	By MS/MS	By MS/MS	By MS/MS	By MS/MS	12.4	12.4	12.4	5.6	8.3	9.5
P17066;P48741	P17066;P48741	10;6	2;2	2;2	Heat shock 70 kDa protein 6;Putative heat shock 70 kDa protein 7	HSPA6;HSPA7	sp|P17066|HSP76_HUMAN Heat shock 70 kDa protein 6 OS=Homo sapiens OX=9606 GN=HSPA6 PE=1 SV=2;sp|P48741|HSP77_HUMAN Putative heat shock 70 kDa protein 7 OS=Homo sapiens OX=9606 GN=HSPA7 PE=5 SV=2	2	10	2	2	10	10	10	10	10	10	2	2	2	2	2	2	2	2	2	2	2	2	15.1	3.7	3.7	71.027	643	643;367	0	36.667	By MS/MS	By MS/MS	By MS/MS	By MS/MS	By MS/MS	By MS/MS	15.1	15.1	15.1	15.1	15.1	15.1
P17081	P17081	4	3	3	Rho-related GTP-binding protein RhoQ	RHOQ	sp|P17081|RHOQ_HUMAN Rho-related GTP-binding protein RhoQ OS=Homo sapiens OX=9606 GN=RHOQ PE=1 SV=2	1	4	3	3	4	4	4	4	4	4	3	3	3	3	3	3	3	3	3	3	3	3	22	16.6	16.6	22.659	205	205	0	24.024	By MS/MS	By MS/MS	By MS/MS	By MS/MS	By MS/MS	By MS/MS	22	22	22	22	22	22
P17174	P17174	12	12	12	Aspartate aminotransferase, cytoplasmic	GOT1	sp|P17174|AATC_HUMAN Aspartate aminotransferase, cytoplasmic OS=Homo sapiens OX=9606 GN=GOT1 PE=1 SV=3	1	12	12	12	10	9	11	12	11	10	10	9	11	12	11	10	10	9	11	12	11	10	33.2	33.2	33.2	46.247	413	413	0	82.503	By MS/MS	By MS/MS	By MS/MS	By MS/MS	By MS/MS	By MS/MS	27.8	25.7	31	33.2	31	28.3
P17213	P17213	7	7	7	Bactericidal permeability-increasing protein	BPI	sp|P17213|BPI_HUMAN Bactericidal permeability-increasing protein OS=Homo sapiens OX=9606 GN=BPI PE=1 SV=4	1	7	7	7	6	6	7	2	2	3	6	6	7	2	2	3	6	6	7	2	2	3	20.5	20.5	20.5	53.899	487	487	0	45.427	By MS/MS	By MS/MS	By MS/MS	By matching	By MS/MS	By MS/MS	18.7	18.5	20.5	4.9	4.9	10.5
P17252;P05771;P05129	P17252	12;3;2	12;3;2	12;3;2	Protein kinase C alpha type	PRKCA	sp|P17252|KPCA_HUMAN Protein kinase C alpha type OS=Homo sapiens OX=9606 GN=PRKCA PE=1 SV=4	3	12	12	12	10	10	11	9	10	10	10	10	11	9	10	10	10	10	11	9	10	10	25.3	25.3	25.3	76.749	672	672;671;697	0	59.386	By MS/MS	By MS/MS	By MS/MS	By MS/MS	By MS/MS	By MS/MS	22.2	21.4	23.2	20.1	22.2	22.2
P17301	P17301	3	3	3	Integrin alpha-2	ITGA2	sp|P17301|ITA2_HUMAN Integrin alpha-2 OS=Homo sapiens OX=9606 GN=ITGA2 PE=1 SV=2	1	3	3	3	3	2	1	2	2	2	3	2	1	2	2	2	3	2	1	2	2	2	3.1	3.1	3.1	129.29	1181	1181	0.00079397	3.0766	By MS/MS	By MS/MS	By MS/MS	By MS/MS	By MS/MS	By MS/MS	3.1	1.7	0.8	1.7	1.7	1.7
P17302	P17302	3	3	3	Gap junction alpha-1 protein	GJA1	sp|P17302|CXA1_HUMAN Gap junction alpha-1 protein OS=Homo sapiens OX=9606 GN=GJA1 PE=1 SV=2	1	3	3	3	1	1	2	3	3	3	1	1	2	3	3	3	1	1	2	3	3	3	11.8	11.8	11.8	43.008	382	382	0	32.234	By MS/MS	By matching	By MS/MS	By MS/MS	By MS/MS	By MS/MS	3.7	3.7	7.6	11.8	11.8	11.8
P17342	P17342	6	6	6	Atrial natriuretic peptide receptor 3	NPR3	sp|P17342|ANPRC_HUMAN Atrial natriuretic peptide receptor 3 OS=Homo sapiens OX=9606 GN=NPR3 PE=1 SV=2	1	6	6	6	4	5	5	5	6	6	4	5	5	5	6	6	4	5	5	5	6	6	13.3	13.3	13.3	59.807	541	541	0	15.463	By MS/MS	By MS/MS	By MS/MS	By MS/MS	By MS/MS	By MS/MS	7.4	11.3	11.3	11.3	13.3	13.3
P17612;P22612	P17612	5;1	1;0	1;0	cAMP-dependent protein kinase catalytic subunit alpha	PRKACA	sp|P17612|KAPCA_HUMAN cAMP-dependent protein kinase catalytic subunit alpha OS=Homo sapiens OX=9606 GN=PRKACA PE=1 SV=2	2	5	1	1	5	5	5	4	5	5	1	1	1	1	1	1	1	1	1	1	1	1	12.8	2.6	2.6	40.589	351	351;351	0.0074983	1.4871	By MS/MS	By MS/MS	By matching	By MS/MS	By MS/MS	By MS/MS	12.8	12.8	12.8	10.3	12.8	12.8
P17655	P17655	12	11	11	Calpain-2 catalytic subunit	CAPN2	sp|P17655|CAN2_HUMAN Calpain-2 catalytic subunit OS=Homo sapiens OX=9606 GN=CAPN2 PE=1 SV=6	1	12	11	11	10	11	10	11	12	12	9	10	9	11	11	11	9	10	9	11	11	11	21.3	20.1	20.1	79.994	700	700	0	81.417	By MS/MS	By MS/MS	By MS/MS	By MS/MS	By MS/MS	By MS/MS	16.1	18.7	16.1	20.1	21.3	21.3
P17693	P17693	2	1	1	HLA class I histocompatibility antigen, alpha chain G	HLA-G	sp|P17693|HLAG_HUMAN HLA class I histocompatibility antigen, alpha chain G OS=Homo sapiens OX=9606 GN=HLA-G PE=1 SV=1	1	2	1	1	2	2	2	2	2	2	1	1	1	1	1	1	1	1	1	1	1	1	6.8	3	3	38.224	338	338	0.0011261	2.3972	By MS/MS	By MS/MS	By MS/MS	By MS/MS	By MS/MS	By matching	6.8	6.8	6.8	6.8	6.8	6.8
P17858	P17858	9	9	7	ATP-dependent 6-phosphofructokinase, liver type	PFKL	sp|P17858|PFKAL_HUMAN ATP-dependent 6-phosphofructokinase, liver type OS=Homo sapiens OX=9606 GN=PFKL PE=1 SV=6	1	9	9	7	8	9	7	8	5	7	8	9	7	8	5	7	6	7	5	6	4	6	13.3	13.3	9.7	85.018	780	780	0	75.862	By MS/MS	By MS/MS	By MS/MS	By MS/MS	By MS/MS	By MS/MS	11.8	13.3	11.7	13.2	8.5	12.1
P17900	P17900	5	5	5	Ganglioside GM2 activator;Ganglioside GM2 activator isoform short	GM2A	sp|P17900|SAP3_HUMAN Ganglioside GM2 activator OS=Homo sapiens OX=9606 GN=GM2A PE=1 SV=4	1	5	5	5	5	5	5	5	5	5	5	5	5	5	5	5	5	5	5	5	5	5	22.8	22.8	22.8	20.838	193	193	0	8.5983	By MS/MS	By MS/MS	By MS/MS	By MS/MS	By MS/MS	By MS/MS	22.8	22.8	22.8	22.8	22.8	22.8
P17927;Q2VPA4	P17927	33;4	33;4	33;4	Complement receptor type 1	CR1	sp|P17927|CR1_HUMAN Complement receptor type 1 OS=Homo sapiens OX=9606 GN=CR1 PE=1 SV=3	2	33	33	33	29	26	23	31	31	30	29	26	23	31	31	30	29	26	23	31	31	30	33	33	33	223.66	2039	2039;569	0	265.54	By MS/MS	By MS/MS	By MS/MS	By MS/MS	By MS/MS	By MS/MS	30.7	27.1	22.8	30.3	31	30.4
P17931	P17931	10	10	10	Galectin-3	LGALS3	sp|P17931|LEG3_HUMAN Galectin-3 OS=Homo sapiens OX=9606 GN=LGALS3 PE=1 SV=5	1	10	10	10	9	9	8	10	8	9	9	9	8	10	8	9	9	9	8	10	8	9	36	36	36	26.152	250	250	0	117.88	By MS/MS	By MS/MS	By MS/MS	By MS/MS	By MS/MS	By MS/MS	33.2	36	30.4	36	30.4	33.2
P17980	P17980	6	6	6	26S protease regulatory subunit 6A	PSMC3	sp|P17980|PRS6A_HUMAN 26S proteasome regulatory subunit 6A OS=Homo sapiens OX=9606 GN=PSMC3 PE=1 SV=3	1	6	6	6	6	6	5	4	5	6	6	6	5	4	5	6	6	6	5	4	5	6	18.2	18.2	18.2	49.203	439	439	0	19.088	By MS/MS	By MS/MS	By MS/MS	By MS/MS	By MS/MS	By MS/MS	18.2	18.2	16.2	14.1	16.2	18.2
P17987	P17987	14	14	14	T-complex protein 1 subunit alpha	TCP1	sp|P17987|TCPA_HUMAN T-complex protein 1 subunit alpha OS=Homo sapiens OX=9606 GN=TCP1 PE=1 SV=1	1	14	14	14	14	14	12	14	13	12	14	14	12	14	13	12	14	14	12	14	13	12	32.6	32.6	32.6	60.343	556	556	0	160.16	By MS/MS	By MS/MS	By MS/MS	By MS/MS	By MS/MS	By MS/MS	32.6	32.6	29	32.6	30.6	29
P18084	P18084	10	10	10	Integrin beta-5	ITGB5	sp|P18084|ITB5_HUMAN Integrin beta-5 OS=Homo sapiens OX=9606 GN=ITGB5 PE=1 SV=1	1	10	10	10	4	7	6	10	8	9	4	7	6	10	8	9	4	7	6	10	8	9	14.4	14.4	14.4	88.053	799	799	0	29.154	By MS/MS	By MS/MS	By MS/MS	By MS/MS	By MS/MS	By MS/MS	5.4	11.1	8.8	14.4	12.6	14.1
P18085	P18085	4	3	3	ADP-ribosylation factor 4	ARF4	sp|P18085|ARF4_HUMAN ADP-ribosylation factor 4 OS=Homo sapiens OX=9606 GN=ARF4 PE=1 SV=3	1	4	3	3	4	3	3	2	3	3	3	2	2	1	2	2	3	2	2	1	2	2	25.6	19.4	19.4	20.511	180	180	0	32.898	By MS/MS	By MS/MS	By MS/MS	By MS/MS	By MS/MS	By MS/MS	25.6	20	20	14.4	20	20
P18206	P18206	40	40	40	Vinculin	VCL	sp|P18206|VINC_HUMAN Vinculin OS=Homo sapiens OX=9606 GN=VCL PE=1 SV=4	1	40	40	40	36	33	34	33	32	34	36	33	34	33	32	34	36	33	34	33	32	34	40.6	40.6	40.6	123.8	1134	1134	0	170.73	By MS/MS	By MS/MS	By MS/MS	By MS/MS	By MS/MS	By MS/MS	36.8	35.4	34.8	35.4	35.7	36.3
P18283	P18283	2	2	2	Glutathione peroxidase 2	GPX2	sp|P18283|GPX2_HUMAN Glutathione peroxidase 2 OS=Homo sapiens OX=9606 GN=GPX2 PE=1 SV=3	1	2	2	2	1	2	1	2	1	2	1	2	1	2	1	2	1	2	1	2	1	2	15.8	15.8	15.8	21.954	190	190	0.00084782	3.9586	By MS/MS	By MS/MS	By matching	By MS/MS	By matching	By MS/MS	6.3	15.8	9.5	15.8	6.3	15.8
P18428	P18428	3	3	3	Lipopolysaccharide-binding protein	LBP	sp|P18428|LBP_HUMAN Lipopolysaccharide-binding protein OS=Homo sapiens OX=9606 GN=LBP PE=1 SV=3	1	3	3	3	1	2	3	3	2	3	1	2	3	3	2	3	1	2	3	3	2	3	6	6	6	53.383	481	481	0	4.852	By MS/MS	By MS/MS	By MS/MS	By MS/MS	By MS/MS	By MS/MS	2.3	4.6	6	6	4.6	6
P18433	P18433	1	1	1	Receptor-type tyrosine-protein phosphatase alpha	PTPRA	sp|P18433|PTPRA_HUMAN Receptor-type tyrosine-protein phosphatase alpha OS=Homo sapiens OX=9606 GN=PTPRA PE=1 SV=3	1	1	1	1	1	1	1	1	1	1	1	1	1	1	1	1	1	1	1	1	1	1	1.5	1.5	1.5	90.718	802	802	0.0018491	2.2267	By MS/MS	By matching	By MS/MS	By matching	By MS/MS	By matching	1.5	1.5	1.5	1.5	1.5	1.5
P18510	P18510	5	5	5	Interleukin-1 receptor antagonist protein	IL1RN	sp|P18510|IL1RA_HUMAN Interleukin-1 receptor antagonist protein OS=Homo sapiens OX=9606 GN=IL1RN PE=1 SV=1	1	5	5	5	2	2	3	5	4	5	2	2	3	5	4	5	2	2	3	5	4	5	38.4	38.4	38.4	20.055	177	177	0	113.79	By MS/MS	By MS/MS	By MS/MS	By MS/MS	By MS/MS	By MS/MS	7.9	7.9	16.9	38.4	27.7	38.4
P18669;Q8N0Y7	P18669	11;3	11;3	7;2	Phosphoglycerate mutase 1	PGAM1	sp|P18669|PGAM1_HUMAN Phosphoglycerate mutase 1 OS=Homo sapiens OX=9606 GN=PGAM1 PE=1 SV=2	2	11	11	7	11	10	9	9	9	9	11	10	9	9	9	9	7	6	6	5	5	5	48	48	35	28.804	254	254;254	0	99.016	By MS/MS	By MS/MS	By MS/MS	By MS/MS	By MS/MS	By MS/MS	48	42.1	47.6	41.7	41.7	41.7
P18827	P18827	1	1	1	Syndecan-1	SDC1	sp|P18827|SDC1_HUMAN Syndecan-1 OS=Homo sapiens OX=9606 GN=SDC1 PE=1 SV=3	1	1	1	1	1	1	1	1	1	1	1	1	1	1	1	1	1	1	1	1	1	1	5.5	5.5	5.5	32.461	310	310	0	4.3396	By matching	By matching	By MS/MS	By MS/MS	By MS/MS	By MS/MS	5.5	5.5	5.5	5.5	5.5	5.5
P19022;P55283	P19022;P55283	1;1	1;1	1;1	Cadherin-2;Cadherin-4	CDH2;CDH4	sp|P19022|CADH2_HUMAN Cadherin-2 OS=Homo sapiens OX=9606 GN=CDH2 PE=1 SV=4;sp|P55283|CADH4_HUMAN Cadherin-4 OS=Homo sapiens OX=9606 GN=CDH4 PE=2 SV=2	2	1	1	1	1	1	1	1	1	0	1	1	1	1	1	0	1	1	1	1	1	0	1.8	1.8	1.8	99.808	906	906;916	0.0022035	2.1461	By matching	By MS/MS	By MS/MS	By matching	By matching		1.8	1.8	1.8	1.8	1.8	0
P19075	P19075	3	3	3	Tetraspanin-8	TSPAN8	sp|P19075|TSN8_HUMAN Tetraspanin-8 OS=Homo sapiens OX=9606 GN=TSPAN8 PE=1 SV=1	1	3	3	3	2	2	3	3	3	3	2	2	3	3	3	3	2	2	3	3	3	3	12.2	12.2	12.2	26.044	237	237	0	4.745	By matching	By matching	By MS/MS	By MS/MS	By MS/MS	By matching	7.6	8.9	12.2	12.2	12.2	12.2
P19086	P19086	8	7	7	Guanine nucleotide-binding protein G(z) subunit alpha	GNAZ	sp|P19086|GNAZ_HUMAN Guanine nucleotide-binding protein G(z) subunit alpha OS=Homo sapiens OX=9606 GN=GNAZ PE=1 SV=3	1	8	7	7	7	7	7	8	8	8	6	6	6	7	7	7	6	6	6	7	7	7	24.2	22	22	40.923	355	355	0	39.566	By MS/MS	By MS/MS	By MS/MS	By MS/MS	By MS/MS	By MS/MS	20.8	20.8	20.8	24.2	24.2	24.2
P19256	P19256	3	3	3	Lymphocyte function-associated antigen 3	CD58	sp|P19256|LFA3_HUMAN Lymphocyte function-associated antigen 3 OS=Homo sapiens OX=9606 GN=CD58 PE=1 SV=1	1	3	3	3	3	3	3	3	3	3	3	3	3	3	3	3	3	3	3	3	3	3	13.2	13.2	13.2	28.147	250	250	0	26.917	By MS/MS	By MS/MS	By MS/MS	By MS/MS	By MS/MS	By MS/MS	13.2	13.2	13.2	13.2	13.2	13.2
P19320	P19320	1	1	1	Vascular cell adhesion protein 1	VCAM1	sp|P19320|VCAM1_HUMAN Vascular cell adhesion protein 1 OS=Homo sapiens OX=9606 GN=VCAM1 PE=1 SV=1	1	1	1	1	1	1	1	1	1	1	1	1	1	1	1	1	1	1	1	1	1	1	1.4	1.4	1.4	81.275	739	739	0.000815	3.4663	By matching	By MS/MS	By matching	By matching	By MS/MS	By MS/MS	1.4	1.4	1.4	1.4	1.4	1.4
P19440;A6NGU5;P36268;Q14390;B5MD39;Q9BX51	P19440;A6NGU5;P36268	17;12;10;4;3;2	17;12;10;4;3;2	17;12;10;4;3;2	Gamma-glutamyltranspeptidase 1;Gamma-glutamyltranspeptidase 1 heavy chain;Gamma-glutamyltranspeptidase 1 light chain;Putative gamma-glutamyltranspeptidase 3;Putative gamma-glutamyltranspeptidase 3 heavy chain;Putative gamma-glutamyltranspeptidase 3 light chain;Inactive gamma-glutamyltranspeptidase 2	GGT1;GGT3P;GGT2	sp|P19440|GGT1_HUMAN Glutathione hydrolase 1 proenzyme OS=Homo sapiens OX=9606 GN=GGT1 PE=1 SV=2;sp|A6NGU5|GGT3_HUMAN Putative glutathione hydrolase 3 proenzyme OS=Homo sapiens OX=9606 GN=GGT3P PE=5 SV=2;sp|P36268|GGT2_HUMAN Inactive glutathione hydrolase	6	17	17	17	17	17	17	16	17	17	17	17	17	16	17	17	17	17	17	16	17	17	31.6	31.6	31.6	61.409	569	569;568;569;218;225;225	0	192.03	By MS/MS	By MS/MS	By MS/MS	By MS/MS	By MS/MS	By MS/MS	31.6	31.6	31.6	31.5	31.6	31.6
P19474	P19474	2	2	2	E3 ubiquitin-protein ligase TRIM21	TRIM21	sp|P19474|RO52_HUMAN E3 ubiquitin-protein ligase TRIM21 OS=Homo sapiens OX=9606 GN=TRIM21 PE=1 SV=1	1	2	2	2	1	2	0	1	1	0	1	2	0	1	1	0	1	2	0	1	1	0	6.3	6.3	6.3	54.169	475	475	0	5.2562	By matching	By MS/MS		By MS/MS	By matching		4.2	6.3	0	4.2	4.2	0
P19634	P19634	3	3	3	Sodium/hydrogen exchanger 1	SLC9A1	sp|P19634|SL9A1_HUMAN Sodium/hydrogen exchanger 1 OS=Homo sapiens OX=9606 GN=SLC9A1 PE=1 SV=2	1	3	3	3	2	1	1	0	2	2	2	1	1	0	2	2	2	1	1	0	2	2	4.7	4.7	4.7	90.762	815	815	0	5.1395	By MS/MS	By MS/MS	By MS/MS		By MS/MS	By MS/MS	3.3	2	2	0	3.3	2.7
P19652	P19652	4	2	2	Alpha-1-acid glycoprotein 2	ORM2	sp|P19652|A1AG2_HUMAN Alpha-1-acid glycoprotein 2 OS=Homo sapiens OX=9606 GN=ORM2 PE=1 SV=2	1	4	2	2	4	2	3	4	4	4	2	0	1	2	2	2	2	0	1	2	2	2	18.9	10.9	10.9	23.602	201	201	0.0011329	2.455	By matching	By matching	By matching	By MS/MS	By MS/MS	By MS/MS	18.9	8	12.9	18.9	18.9	18.9
P19801	P19801	11	11	11	Amiloride-sensitive amine oxidase [copper-containing]	AOC1	sp|P19801|AOC1_HUMAN Amiloride-sensitive amine oxidase [copper-containing] OS=Homo sapiens OX=9606 GN=AOC1 PE=1 SV=4	1	11	11	11	5	3	3	10	9	10	5	3	3	10	9	10	5	3	3	10	9	10	17.7	17.7	17.7	85.377	751	751	0	32.872	By MS/MS	By MS/MS	By MS/MS	By MS/MS	By MS/MS	By MS/MS	9.1	4.8	5.3	16.5	15	16.5
P19827;CON__Q0VCM5	P19827	7;1	7;1	7;1	Inter-alpha-trypsin inhibitor heavy chain H1	ITIH1	sp|P19827|ITIH1_HUMAN Inter-alpha-trypsin inhibitor heavy chain H1 OS=Homo sapiens OX=9606 GN=ITIH1 PE=1 SV=3	2	7	7	7	2	1	2	6	7	6	2	1	2	6	7	6	2	1	2	6	7	6	10.6	10.6	10.6	101.39	911	911;906	0	40.764	By MS/MS	By matching	By matching	By MS/MS	By MS/MS	By MS/MS	3.2	1	2.1	9.5	10.6	9.5
P19971	P19971	5	5	5	Thymidine phosphorylase	TYMP	sp|P19971|TYPH_HUMAN Thymidine phosphorylase OS=Homo sapiens OX=9606 GN=TYMP PE=1 SV=2	1	5	5	5	3	4	3	5	2	4	3	4	3	5	2	4	3	4	3	5	2	4	13.5	13.5	13.5	49.955	482	482	0	10.268	By MS/MS	By MS/MS	By MS/MS	By MS/MS	By MS/MS	By MS/MS	7.7	11.6	8.9	13.5	4.1	11.6
P20020	P20020	7	2	2	Plasma membrane calcium-transporting ATPase 1	ATP2B1	sp|P20020|AT2B1_HUMAN Plasma membrane calcium-transporting ATPase 1 OS=Homo sapiens OX=9606 GN=ATP2B1 PE=1 SV=4	1	7	2	2	6	5	5	7	6	6	2	1	1	2	2	2	2	1	1	2	2	2	8.9	2.3	2.3	134.68	1220	1220	0.0011219	2.341	By MS/MS	By matching	By MS/MS	By matching	By MS/MS	By matching	7.5	6.1	6.1	8.9	7.5	7.5
P20042	P20042	2	2	2	Eukaryotic translation initiation factor 2 subunit 2	EIF2S2	sp|P20042|IF2B_HUMAN Eukaryotic translation initiation factor 2 subunit 2 OS=Homo sapiens OX=9606 GN=EIF2S2 PE=1 SV=2	1	2	2	2	2	2	2	1	2	1	2	2	2	1	2	1	2	2	2	1	2	1	7.2	7.2	7.2	38.388	333	333	0	24.96	By MS/MS	By MS/MS	By MS/MS	By MS/MS	By matching	By MS/MS	7.2	7.2	7.2	4.5	7.2	4.5
P20073	P20073	21	21	21	Annexin A7	ANXA7	sp|P20073|ANXA7_HUMAN Annexin A7 OS=Homo sapiens OX=9606 GN=ANXA7 PE=1 SV=3	1	21	21	21	21	21	20	20	21	20	21	21	20	20	21	20	21	21	20	20	21	20	39.1	39.1	39.1	52.739	488	488	0	251.29	By MS/MS	By MS/MS	By MS/MS	By MS/MS	By MS/MS	By MS/MS	39.1	39.1	39.1	39.1	39.1	39.1
P20151	P20151	3	2	2	Kallikrein-2	KLK2	sp|P20151|KLK2_HUMAN Kallikrein-2 OS=Homo sapiens OX=9606 GN=KLK2 PE=1 SV=1	1	3	2	2	2	2	2	3	3	2	1	1	1	2	2	1	1	1	1	2	2	1	13	9.6	9.6	28.671	261	261	0	8.09	By MS/MS	By MS/MS	By MS/MS	By MS/MS	By MS/MS	By MS/MS	10	10	10	13	13	10
P20336	P20336	5	3	3	Ras-related protein Rab-3A	RAB3A	sp|P20336|RAB3A_HUMAN Ras-related protein Rab-3A OS=Homo sapiens OX=9606 GN=RAB3A PE=1 SV=1	1	5	3	3	5	5	5	5	5	5	3	3	3	3	3	3	3	3	3	3	3	3	25.5	18.2	18.2	24.984	220	220	0	24.942	By MS/MS	By MS/MS	By MS/MS	By MS/MS	By MS/MS	By MS/MS	25.5	25.5	25.5	25.5	25.5	25.5
P20337	P20337	6	5	5	Ras-related protein Rab-3B	RAB3B	sp|P20337|RAB3B_HUMAN Ras-related protein Rab-3B OS=Homo sapiens OX=9606 GN=RAB3B PE=1 SV=2	1	6	5	5	6	6	6	6	6	6	5	5	5	5	5	5	5	5	5	5	5	5	26	22.4	22.4	24.758	219	219	0	107.42	By MS/MS	By MS/MS	By MS/MS	By MS/MS	By MS/MS	By MS/MS	26	26	26	26	26	26
P20338	P20338	3	3	3	Ras-related protein Rab-4A	RAB4A	sp|P20338|RAB4A_HUMAN Ras-related protein Rab-4A OS=Homo sapiens OX=9606 GN=RAB4A PE=1 SV=3	1	3	3	3	3	3	3	2	3	2	3	3	3	2	3	2	3	3	3	2	3	2	16.5	16.5	16.5	24.389	218	218	0	6.1915	By MS/MS	By MS/MS	By MS/MS	By MS/MS	By MS/MS	By MS/MS	16.5	16.5	16.5	9.6	16.5	11.9
P20339	P20339	6	4	4	Ras-related protein Rab-5A	RAB5A	sp|P20339|RAB5A_HUMAN Ras-related protein Rab-5A OS=Homo sapiens OX=9606 GN=RAB5A PE=1 SV=2	1	6	4	4	5	6	6	6	6	6	3	4	4	4	4	4	3	4	4	4	4	4	43.7	33.5	33.5	23.658	215	215	0	43.677	By MS/MS	By MS/MS	By MS/MS	By MS/MS	By MS/MS	By MS/MS	32.1	43.7	43.7	43.7	43.7	43.7
P20340;Q9NRW1;Q14964	P20340;Q9NRW1	9;5;1	9;5;1	7;4;1	Ras-related protein Rab-6A;Ras-related protein Rab-6B	RAB6A;RAB6B	sp|P20340|RAB6A_HUMAN Ras-related protein Rab-6A OS=Homo sapiens OX=9606 GN=RAB6A PE=1 SV=3;sp|Q9NRW1|RAB6B_HUMAN Ras-related protein Rab-6B OS=Homo sapiens OX=9606 GN=RAB6B PE=1 SV=1	3	9	9	7	9	9	8	9	8	8	9	9	8	9	8	8	7	7	6	7	7	7	46.2	46.2	37	23.593	208	208;208;217	0	29.446	By MS/MS	By MS/MS	By MS/MS	By MS/MS	By MS/MS	By MS/MS	46.2	46.2	42.3	46.2	41.3	41.3
P20472	P20472	8	8	8	Parvalbumin alpha	PVALB	sp|P20472|PRVA_HUMAN Parvalbumin alpha OS=Homo sapiens OX=9606 GN=PVALB PE=1 SV=2	1	8	8	8	7	7	7	8	7	7	7	7	7	8	7	7	7	7	7	8	7	7	57.3	57.3	57.3	12.059	110	110	0	21.748	By MS/MS	By MS/MS	By MS/MS	By MS/MS	By MS/MS	By MS/MS	56.4	56.4	56.4	57.3	56.4	56.4
P20618	P20618	5	5	5	Proteasome subunit beta type-1	PSMB1	sp|P20618|PSB1_HUMAN Proteasome subunit beta type-1 OS=Homo sapiens OX=9606 GN=PSMB1 PE=1 SV=2	1	5	5	5	5	3	4	3	4	4	5	3	4	3	4	4	5	3	4	3	4	4	32.8	32.8	32.8	26.489	241	241	0	58.122	By MS/MS	By MS/MS	By MS/MS	By MS/MS	By MS/MS	By MS/MS	32.8	20.3	28.6	20.3	28.6	28.6
P20711	P20711	13	13	13	Aromatic-L-amino-acid decarboxylase	DDC	sp|P20711|DDC_HUMAN Aromatic-L-amino-acid decarboxylase OS=Homo sapiens OX=9606 GN=DDC PE=1 SV=2	1	13	13	13	13	12	13	13	13	13	13	12	13	13	13	13	13	12	13	13	13	13	24.6	24.6	24.6	53.926	480	480	0	110.93	By MS/MS	By MS/MS	By MS/MS	By MS/MS	By MS/MS	By MS/MS	24.6	24.6	24.6	24.6	24.6	24.6
P20810	P20810	8	8	8	Calpastatin	CAST	sp|P20810|ICAL_HUMAN Calpastatin OS=Homo sapiens OX=9606 GN=CAST PE=1 SV=4	1	8	8	8	6	4	6	7	6	5	6	4	6	7	6	5	6	4	6	7	6	5	17.4	17.4	17.4	76.572	708	708	0	75.309	By MS/MS	By MS/MS	By MS/MS	By MS/MS	By MS/MS	By MS/MS	12.6	10.6	13.7	17.4	13	12.6
P20933	P20933	2	2	2	N(4)-(beta-N-acetylglucosaminyl)-L-asparaginase;Glycosylasparaginase alpha chain;Glycosylasparaginase beta chain	AGA	sp|P20933|ASPG_HUMAN N(4)-(beta-N-acetylglucosaminyl)-L-asparaginase OS=Homo sapiens OX=9606 GN=AGA PE=1 SV=2	1	2	2	2	1	1	2	0	1	0	1	1	2	0	1	0	1	1	2	0	1	0	5.2	5.2	5.2	37.208	346	346	0.0011534	2.6378	By matching	By MS/MS	By MS/MS		By matching		3.2	3.2	5.2	0	3.2	0
P20936	P20936	2	2	2	Ras GTPase-activating protein 1	RASA1	sp|P20936|RASA1_HUMAN Ras GTPase-activating protein 1 OS=Homo sapiens OX=9606 GN=RASA1 PE=1 SV=1	1	2	2	2	2	1	1	1	2	2	2	1	1	1	2	2	2	1	1	1	2	2	2.4	2.4	2.4	116.4	1047	1047	0.00080354	3.2448	By MS/MS	By MS/MS	By MS/MS	By MS/MS	By MS/MS	By MS/MS	2.4	1.1	1.1	1.1	2.4	2.4
P21266	P21266	14	14	12	Glutathione S-transferase Mu 3	GSTM3	sp|P21266|GSTM3_HUMAN Glutathione S-transferase Mu 3 OS=Homo sapiens OX=9606 GN=GSTM3 PE=1 SV=3	1	14	14	12	12	10	12	14	12	13	12	10	12	14	12	13	10	9	11	12	10	11	59.6	59.6	52.4	26.559	225	225	0	102.32	By MS/MS	By MS/MS	By MS/MS	By MS/MS	By MS/MS	By MS/MS	53.8	42.7	49.8	59.6	53.8	53.8
P21281	P21281	15	10	10	V-type proton ATPase subunit B, brain isoform	ATP6V1B2	sp|P21281|VATB2_HUMAN V-type proton ATPase subunit B, brain isoform OS=Homo sapiens OX=9606 GN=ATP6V1B2 PE=1 SV=3	1	15	10	10	14	14	14	15	14	15	9	9	9	10	9	10	9	9	9	10	9	10	32.9	21.5	21.5	56.5	511	511	0	106.71	By MS/MS	By MS/MS	By MS/MS	By MS/MS	By MS/MS	By MS/MS	29.5	29.5	30.7	32.9	30.7	32.9
P21283	P21283	17	17	17	V-type proton ATPase subunit C 1	ATP6V1C1	sp|P21283|VATC1_HUMAN V-type proton ATPase subunit C 1 OS=Homo sapiens OX=9606 GN=ATP6V1C1 PE=1 SV=4	1	17	17	17	13	15	16	16	15	16	13	15	16	16	15	16	13	15	16	16	15	16	41.6	41.6	41.6	43.941	382	382	0	37.785	By MS/MS	By MS/MS	By MS/MS	By MS/MS	By MS/MS	By MS/MS	29.8	34.3	39.8	39.3	37.4	39.5
P21291	P21291	8	8	8	Cysteine and glycine-rich protein 1	CSRP1	sp|P21291|CSRP1_HUMAN Cysteine and glycine-rich protein 1 OS=Homo sapiens OX=9606 GN=CSRP1 PE=1 SV=3	1	8	8	8	7	8	8	8	7	8	7	8	8	8	7	8	7	8	8	8	7	8	50.8	50.8	50.8	20.567	193	193	0	95.462	By MS/MS	By MS/MS	By MS/MS	By MS/MS	By MS/MS	By MS/MS	47.2	50.8	50.8	50.8	50.8	50.8
P21333	P21333	6	5	5	Filamin-A	FLNA	sp|P21333|FLNA_HUMAN Filamin-A OS=Homo sapiens OX=9606 GN=FLNA PE=1 SV=4	1	6	5	5	3	6	5	2	4	3	2	5	4	2	3	2	2	5	4	2	3	2	3	2.7	2.7	280.74	2647	2647	0.00043422	4.3045	By MS/MS	By MS/MS	By MS/MS	By MS/MS	By MS/MS	By MS/MS	1.6	3	2.5	1	2	1.6
P21399;O00408	P21399	26;1	26;1	26;1	Cytoplasmic aconitate hydratase	ACO1	sp|P21399|ACOHC_HUMAN Cytoplasmic aconitate hydratase OS=Homo sapiens OX=9606 GN=ACO1 PE=1 SV=3	2	26	26	26	23	21	23	21	26	23	23	21	23	21	26	23	23	21	23	21	26	23	30.8	30.8	30.8	98.398	889	889;941	0	114.46	By MS/MS	By MS/MS	By MS/MS	By MS/MS	By MS/MS	By MS/MS	28.8	27.2	29	27.2	30.8	28.3
P21579;Q8N9I0	P21579	5;1	5;1	5;1	Synaptotagmin-1	SYT1	sp|P21579|SYT1_HUMAN Synaptotagmin-1 OS=Homo sapiens OX=9606 GN=SYT1 PE=1 SV=1	2	5	5	5	4	4	4	4	4	3	4	4	4	4	4	3	4	4	4	4	4	3	13	13	13	47.573	422	422;419	0	11.064	By MS/MS	By MS/MS	By MS/MS	By MS/MS	By MS/MS	By MS/MS	11.1	11.1	11.1	11.1	11.1	8.1
P21589	P21589	13	13	13	5-nucleotidase	NT5E	sp|P21589|5NTD_HUMAN 5-nucleotidase OS=Homo sapiens OX=9606 GN=NT5E PE=1 SV=1	1	13	13	13	13	12	12	13	13	13	13	12	12	13	13	13	13	12	12	13	13	13	25.8	25.8	25.8	63.367	574	574	0	126.25	By MS/MS	By MS/MS	By MS/MS	By MS/MS	By MS/MS	By MS/MS	25.8	24.4	24.4	25.8	25.8	25.8
P21695	P21695	15	15	14	Glycerol-3-phosphate dehydrogenase [NAD(+)], cytoplasmic	GPD1	sp|P21695|GPDA_HUMAN Glycerol-3-phosphate dehydrogenase [NAD(+)], cytoplasmic OS=Homo sapiens OX=9606 GN=GPD1 PE=1 SV=4	1	15	15	14	15	15	15	15	14	14	15	15	15	15	14	14	14	14	14	14	13	13	46.1	46.1	44.1	37.567	349	349	0	116.61	By MS/MS	By MS/MS	By MS/MS	By MS/MS	By MS/MS	By MS/MS	46.1	46.1	46.1	46.1	43.6	43.6
P21796	P21796	15	15	15	Voltage-dependent anion-selective channel protein 1	VDAC1	sp|P21796|VDAC1_HUMAN Voltage-dependent anion-selective channel protein 1 OS=Homo sapiens OX=9606 GN=VDAC1 PE=1 SV=2	1	15	15	15	15	15	15	14	14	14	15	15	15	14	14	14	15	15	15	14	14	14	64.3	64.3	64.3	30.772	283	283	0	173.12	By MS/MS	By MS/MS	By MS/MS	By MS/MS	By MS/MS	By MS/MS	64.3	64.3	64.3	63.3	63.3	63.3
P21810;P07585	P21810	6;1	6;1	6;1	Biglycan	BGN	sp|P21810|PGS1_HUMAN Biglycan OS=Homo sapiens OX=9606 GN=BGN PE=1 SV=2	2	6	6	6	4	4	5	6	5	5	4	4	5	6	5	5	4	4	5	6	5	5	20.4	20.4	20.4	41.654	368	368;359	0	42.276	By MS/MS	By MS/MS	By MS/MS	By MS/MS	By MS/MS	By MS/MS	16.3	16.3	18.5	20.4	18.5	18.5
P21926	P21926	6	6	6	CD9 antigen	CD9	sp|P21926|CD9_HUMAN CD9 antigen OS=Homo sapiens OX=9606 GN=CD9 PE=1 SV=4	1	6	6	6	5	6	6	6	6	6	5	6	6	6	6	6	5	6	6	6	6	6	15.4	15.4	15.4	25.416	228	228	0	14.115	By MS/MS	By MS/MS	By MS/MS	By MS/MS	By MS/MS	By MS/MS	14.5	15.4	15.4	15.4	15.4	15.4
P21964	P21964	8	8	8	Catechol O-methyltransferase	COMT	sp|P21964|COMT_HUMAN Catechol O-methyltransferase OS=Homo sapiens OX=9606 GN=COMT PE=1 SV=2	1	8	8	8	8	8	8	8	8	8	8	8	8	8	8	8	8	8	8	8	8	8	32.1	32.1	32.1	30.037	271	271	0	62.962	By MS/MS	By MS/MS	By MS/MS	By MS/MS	By MS/MS	By MS/MS	32.1	32.1	32.1	32.1	32.1	32.1
P21980	P21980	10	10	10	Protein-glutamine gamma-glutamyltransferase 2	TGM2	sp|P21980|TGM2_HUMAN Protein-glutamine gamma-glutamyltransferase 2 OS=Homo sapiens OX=9606 GN=TGM2 PE=1 SV=2	1	10	10	10	9	10	9	6	8	7	9	10	9	6	8	7	9	10	9	6	8	7	15.4	15.4	15.4	77.328	687	687	0	18.567	By MS/MS	By MS/MS	By MS/MS	By MS/MS	By MS/MS	By MS/MS	13.4	15.4	13.2	9.3	12.8	11.1
P22059	P22059	14	14	14	Oxysterol-binding protein 1	OSBP	sp|P22059|OSBP1_HUMAN Oxysterol-binding protein 1 OS=Homo sapiens OX=9606 GN=OSBP PE=1 SV=1	1	14	14	14	14	14	14	12	11	13	14	14	14	12	11	13	14	14	14	12	11	13	19.5	19.5	19.5	89.42	807	807	0	37.876	By MS/MS	By MS/MS	By MS/MS	By MS/MS	By MS/MS	By MS/MS	19.5	19.5	19.5	17.1	14.1	17.3
P22061	P22061	6	6	6	Protein-L-isoaspartate(D-aspartate) O-methyltransferase	PCMT1	sp|P22061|PIMT_HUMAN Protein-L-isoaspartate(D-aspartate) O-methyltransferase OS=Homo sapiens OX=9606 GN=PCMT1 PE=1 SV=4	1	6	6	6	6	6	6	6	6	6	6	6	6	6	6	6	6	6	6	6	6	6	34.4	34.4	34.4	24.636	227	227	0	34.655	By MS/MS	By MS/MS	By MS/MS	By MS/MS	By MS/MS	By MS/MS	34.4	34.4	34.4	34.4	34.4	34.4
P22102	P22102	6	6	6	Trifunctional purine biosynthetic protein adenosine-3;Phosphoribosylamine--glycine ligase;Phosphoribosylformylglycinamidine cyclo-ligase;Phosphoribosylglycinamide formyltransferase	GART	sp|P22102|PUR2_HUMAN Trifunctional purine biosynthetic protein adenosine-3 OS=Homo sapiens OX=9606 GN=GART PE=1 SV=1	1	6	6	6	5	6	5	4	5	4	5	6	5	4	5	4	5	6	5	4	5	4	8.4	8.4	8.4	107.77	1010	1010	0	34.132	By MS/MS	By MS/MS	By MS/MS	By MS/MS	By MS/MS	By MS/MS	7.2	8.4	7.5	6.3	7.5	6.3
P22234	P22234	7	7	7	Multifunctional protein ADE2;Phosphoribosylaminoimidazole-succinocarboxamide synthase;Phosphoribosylaminoimidazole carboxylase	PAICS	sp|P22234|PUR6_HUMAN Bifunctional phosphoribosylaminoimidazole carboxylase/phosphoribosylaminoimidazole succinocarboxamide synthetase OS=Homo sapiens OX=9606 GN=PAICS PE=1 SV=3	1	7	7	7	6	6	7	5	5	4	6	6	7	5	5	4	6	6	7	5	5	4	19.1	19.1	19.1	47.079	425	425	0	35.694	By MS/MS	By MS/MS	By MS/MS	By MS/MS	By MS/MS	By MS/MS	16.2	18.8	19.1	12.7	13.6	13.6
P22314	P22314	26	26	26	Ubiquitin-like modifier-activating enzyme 1	UBA1	sp|P22314|UBA1_HUMAN Ubiquitin-like modifier-activating enzyme 1 OS=Homo sapiens OX=9606 GN=UBA1 PE=1 SV=3	1	26	26	26	24	26	24	23	24	24	24	26	24	23	24	24	24	26	24	23	24	24	26.4	26.4	26.4	117.85	1058	1058	0	321.47	By MS/MS	By MS/MS	By MS/MS	By MS/MS	By MS/MS	By MS/MS	25.7	26.4	23.2	23.2	23.6	24.3
P22352	P22352	3	3	3	Glutathione peroxidase 3	GPX3	sp|P22352|GPX3_HUMAN Glutathione peroxidase 3 OS=Homo sapiens OX=9606 GN=GPX3 PE=1 SV=2	1	3	3	3	3	2	1	2	2	2	3	2	1	2	2	2	3	2	1	2	2	2	18.1	18.1	18.1	25.552	226	226	0	6.6859	By MS/MS	By MS/MS	By MS/MS	By MS/MS	By MS/MS	By MS/MS	18.1	11.5	6.2	11.5	12.8	11.5
P22392;O60361	P22392;O60361	8;5	3;2	3;2	Nucleoside diphosphate kinase B;Putative nucleoside diphosphate kinase	NME2;NME2P1	sp|P22392|NDKB_HUMAN Nucleoside diphosphate kinase B OS=Homo sapiens OX=9606 GN=NME2 PE=1 SV=1;sp|O60361|NDK8_HUMAN Putative nucleoside diphosphate kinase OS=Homo sapiens OX=9606 GN=NME2P1 PE=5 SV=1	2	8	3	3	7	6	7	6	8	8	3	3	3	3	3	3	3	3	3	3	3	3	47.4	17.1	17.1	17.298	152	152;137	0	4.7875	By MS/MS	By MS/MS	By MS/MS	By MS/MS	By MS/MS	By MS/MS	39.5	34.2	42.1	34.2	47.4	47.4
P22626	P22626	2	2	2	Heterogeneous nuclear ribonucleoproteins A2/B1	HNRNPA2B1	sp|P22626|ROA2_HUMAN Heterogeneous nuclear ribonucleoproteins A2/B1 OS=Homo sapiens OX=9606 GN=HNRNPA2B1 PE=1 SV=2	1	2	2	2	1	1	1	1	0	2	1	1	1	1	0	2	1	1	1	1	0	2	6.5	6.5	6.5	37.429	353	353	0.00085251	4.0325	By MS/MS	By MS/MS	By MS/MS	By MS/MS		By MS/MS	3.7	2.8	3.7	3.7	0	6.5
P22694	P22694	5	5	1	cAMP-dependent protein kinase catalytic subunit beta	PRKACB	sp|P22694|KAPCB_HUMAN cAMP-dependent protein kinase catalytic subunit beta OS=Homo sapiens OX=9606 GN=PRKACB PE=1 SV=2	1	5	5	1	5	5	5	4	5	5	5	5	5	4	5	5	1	1	1	1	1	1	15.1	15.1	4.8	40.622	351	351	0	15.286	By MS/MS	By MS/MS	By MS/MS	By MS/MS	By MS/MS	By MS/MS	15.1	15.1	15.1	12.5	15.1	15.1
P22732	P22732	7	7	7	Solute carrier family 2, facilitated glucose transporter member 5	SLC2A5	sp|P22732|GTR5_HUMAN Solute carrier family 2, facilitated glucose transporter member 5 OS=Homo sapiens OX=9606 GN=SLC2A5 PE=1 SV=1	1	7	7	7	7	7	7	7	7	7	7	7	7	7	7	7	7	7	7	7	7	7	10.4	10.4	10.4	54.973	501	501	0	61.932	By MS/MS	By MS/MS	By MS/MS	By MS/MS	By MS/MS	By MS/MS	10.4	10.4	10.4	10.4	10.4	10.4
P22735	P22735	1	1	1	Protein-glutamine gamma-glutamyltransferase K	TGM1	sp|P22735|TGM1_HUMAN Protein-glutamine gamma-glutamyltransferase K OS=Homo sapiens OX=9606 GN=TGM1 PE=1 SV=4	1	1	1	1	0	0	1	0	0	0	0	0	1	0	0	0	0	0	1	0	0	0	2	2	2	89.786	817	817	0.002193	2.1185			By MS/MS				0	0	2	0	0	0
P22748	P22748	5	5	5	Carbonic anhydrase 4	CA4	sp|P22748|CAH4_HUMAN Carbonic anhydrase 4 OS=Homo sapiens OX=9606 GN=CA4 PE=1 SV=2	1	5	5	5	4	4	4	4	5	4	4	4	4	4	5	4	4	4	4	4	5	4	16.3	16.3	16.3	35.032	312	312	0	48.795	By MS/MS	By MS/MS	By MS/MS	By MS/MS	By MS/MS	By MS/MS	14.1	14.1	14.1	14.1	16.3	14.1
P22792	P22792	6	6	6	Carboxypeptidase N subunit 2	CPN2	sp|P22792|CPN2_HUMAN Carboxypeptidase N subunit 2 OS=Homo sapiens OX=9606 GN=CPN2 PE=1 SV=3	1	6	6	6	5	4	3	5	6	5	5	4	3	5	6	5	5	4	3	5	6	5	13.9	13.9	13.9	60.556	545	545	0	48.231	By MS/MS	By MS/MS	By MS/MS	By MS/MS	By MS/MS	By MS/MS	12.5	8.4	7	12.5	13.9	12.5
P22891	P22891	5	5	5	Vitamin K-dependent protein Z	PROZ	sp|P22891|PROZ_HUMAN Vitamin K-dependent protein Z OS=Homo sapiens OX=9606 GN=PROZ PE=1 SV=2	1	5	5	5	1	2	4	5	5	5	1	2	4	5	5	5	1	2	4	5	5	5	14.5	14.5	14.5	44.743	400	400	0	29.126	By MS/MS	By MS/MS	By MS/MS	By MS/MS	By MS/MS	By MS/MS	4.2	6.5	12	14.5	14.5	14.5
P23229	P23229	4	4	4	Integrin alpha-6;Integrin alpha-6 heavy chain;Integrin alpha-6 light chain;Processed integrin alpha-6	ITGA6	sp|P23229|ITA6_HUMAN Integrin alpha-6 OS=Homo sapiens OX=9606 GN=ITGA6 PE=1 SV=5	1	4	4	4	4	4	4	3	2	2	4	4	4	3	2	2	4	4	4	3	2	2	4.2	4.2	4.2	126.6	1130	1130	0	19.314	By MS/MS	By MS/MS	By MS/MS	By MS/MS	By MS/MS	By MS/MS	4.2	4.2	4.2	2.7	1.5	2.1
P23284	P23284	2	2	2	Peptidyl-prolyl cis-trans isomerase B	PPIB	sp|P23284|PPIB_HUMAN Peptidyl-prolyl cis-trans isomerase B OS=Homo sapiens OX=9606 GN=PPIB PE=1 SV=2	1	2	2	2	2	1	2	2	2	2	2	1	2	2	2	2	2	1	2	2	2	2	10.6	10.6	10.6	23.742	216	216	0	4.6481	By MS/MS	By matching	By MS/MS	By matching	By MS/MS	By MS/MS	10.6	4.6	10.6	10.6	10.6	10.6
P23381	P23381	9	9	9	Tryptophan--tRNA ligase, cytoplasmic;T1-TrpRS;T2-TrpRS	WARS	sp|P23381|SYWC_HUMAN Tryptophan--tRNA ligase, cytoplasmic OS=Homo sapiens OX=9606 GN=WARS1 PE=1 SV=2	1	9	9	9	5	9	7	7	7	6	5	9	7	7	7	6	5	9	7	7	7	6	22.3	22.3	22.3	53.165	471	471	0	53.953	By MS/MS	By MS/MS	By MS/MS	By MS/MS	By MS/MS	By MS/MS	14	22.3	18.7	19.7	18	18
P23396	P23396	2	2	2	40S ribosomal protein S3	RPS3	sp|P23396|RS3_HUMAN 40S ribosomal protein S3 OS=Homo sapiens OX=9606 GN=RPS3 PE=1 SV=2	1	2	2	2	1	1	1	1	2	0	1	1	1	1	2	0	1	1	1	1	2	0	8.6	8.6	8.6	26.688	243	243	0.0011228	2.3442	By matching	By matching	By MS/MS	By MS/MS	By MS/MS		3.7	3.7	3.7	3.7	8.6	0
P23458	P23458	9	9	9	Tyrosine-protein kinase JAK1	JAK1	sp|P23458|JAK1_HUMAN Tyrosine-protein kinase JAK1 OS=Homo sapiens OX=9606 GN=JAK1 PE=1 SV=2	1	9	9	9	6	8	6	6	8	8	6	8	6	6	8	8	6	8	6	6	8	8	9.4	9.4	9.4	133.28	1154	1154	0	18.598	By MS/MS	By MS/MS	By MS/MS	By MS/MS	By MS/MS	By MS/MS	6.1	8.2	5.5	5.5	8.3	8.2
P23468	P23468	9	9	3	Receptor-type tyrosine-protein phosphatase delta	PTPRD	sp|P23468|PTPRD_HUMAN Receptor-type tyrosine-protein phosphatase delta OS=Homo sapiens OX=9606 GN=PTPRD PE=1 SV=2	1	9	9	3	6	6	6	8	8	9	6	6	6	8	8	9	0	1	1	2	3	3	5.7	5.7	1.5	214.76	1912	1912	0	19.647	By MS/MS	By MS/MS	By MS/MS	By MS/MS	By MS/MS	By MS/MS	4.2	4	4.1	5.1	4.7	5.7
P23526	P23526	13	13	13	Adenosylhomocysteinase	AHCY	sp|P23526|SAHH_HUMAN Adenosylhomocysteinase OS=Homo sapiens OX=9606 GN=AHCY PE=1 SV=4	1	13	13	13	12	12	12	11	12	12	12	12	12	11	12	12	12	12	12	11	12	12	31.5	31.5	31.5	47.716	432	432	0	81.978	By MS/MS	By MS/MS	By MS/MS	By MS/MS	By MS/MS	By MS/MS	29.6	29.6	29.6	27.3	29.6	29.9
P23528	P23528	15	15	13	Cofilin-1	CFL1	sp|P23528|COF1_HUMAN Cofilin-1 OS=Homo sapiens OX=9606 GN=CFL1 PE=1 SV=3	1	15	15	13	15	15	15	14	14	14	15	15	15	14	14	14	13	13	13	12	12	12	69.3	69.3	65.1	18.502	166	166	0	178.77	By MS/MS	By MS/MS	By MS/MS	By MS/MS	By MS/MS	By MS/MS	69.3	69.3	69.3	69.3	69.3	69.3
P23634	P23634	7	7	2	Plasma membrane calcium-transporting ATPase 4	ATP2B4	sp|P23634|AT2B4_HUMAN Plasma membrane calcium-transporting ATPase 4 OS=Homo sapiens OX=9606 GN=ATP2B4 PE=1 SV=2	1	7	7	2	5	6	6	7	6	6	5	6	6	7	6	6	1	2	2	2	2	2	9.1	9.1	2.6	137.92	1241	1241	0	53.71	By MS/MS	By MS/MS	By MS/MS	By MS/MS	By MS/MS	By MS/MS	6.4	7.7	7.7	9.1	7.7	7.7
P24071	P24071	1	1	1	Immunoglobulin alpha Fc receptor	FCAR	sp|P24071|FCAR_HUMAN Immunoglobulin alpha Fc receptor OS=Homo sapiens OX=9606 GN=FCAR PE=1 SV=1	1	1	1	1	1	1	1	0	0	0	1	1	1	0	0	0	1	1	1	0	0	0	3.8	3.8	3.8	32.265	287	287	0	5.683	By MS/MS	By MS/MS	By MS/MS				3.8	3.8	3.8	0	0	0
P24158	P24158	1	1	1	Myeloblastin	PRTN3	sp|P24158|PRTN3_HUMAN Myeloblastin OS=Homo sapiens OX=9606 GN=PRTN3 PE=1 SV=3	1	1	1	1	1	1	1	0	1	1	1	1	1	0	1	1	1	1	1	0	1	1	9.4	9.4	9.4	27.807	256	256	0	25.843	By MS/MS	By MS/MS	By MS/MS		By MS/MS	By matching	9.4	9.4	9.4	0	9.4	9.4
P24298	P24298	8	8	8	Alanine aminotransferase 1	GPT	sp|P24298|ALAT1_HUMAN Alanine aminotransferase 1 OS=Homo sapiens OX=9606 GN=GPT PE=1 SV=3	1	8	8	8	8	7	8	4	4	4	8	7	8	4	4	4	8	7	8	4	4	4	19.8	19.8	19.8	54.636	496	496	0	32.803	By MS/MS	By MS/MS	By MS/MS	By MS/MS	By MS/MS	By MS/MS	19.8	15.9	19.8	10.5	10.5	10.5
P24534	P24534	3	2	2	Elongation factor 1-beta	EEF1B2	sp|P24534|EF1B_HUMAN Elongation factor 1-beta OS=Homo sapiens OX=9606 GN=EEF1B2 PE=1 SV=3	1	3	2	2	3	3	3	2	1	2	2	2	2	2	1	2	2	2	2	2	1	2	16.9	12	12	24.763	225	225	0	5.1958	By MS/MS	By MS/MS	By MS/MS	By MS/MS	By MS/MS	By MS/MS	16.9	16.9	16.9	12	4	12
P24666	P24666	3	3	3	Low molecular weight phosphotyrosine protein phosphatase	ACP1	sp|P24666|PPAC_HUMAN Low molecular weight phosphotyrosine protein phosphatase OS=Homo sapiens OX=9606 GN=ACP1 PE=1 SV=3	1	3	3	3	3	3	3	2	3	3	3	3	3	2	3	3	3	3	3	2	3	3	29.7	29.7	29.7	18.042	158	158	0	40.916	By MS/MS	By MS/MS	By MS/MS	By MS/MS	By MS/MS	By MS/MS	29.7	29.7	29.7	14.6	29.7	29.7
P24723	P24723	5	3	3	Protein kinase C eta type	PRKCH	sp|P24723|KPCL_HUMAN Protein kinase C eta type OS=Homo sapiens OX=9606 GN=PRKCH PE=1 SV=4	1	5	3	3	2	3	2	5	4	3	1	2	1	3	3	2	1	2	1	3	3	2	8.9	5.7	5.7	77.828	683	683	0	8.2585	By matching	By matching	By matching	By MS/MS	By MS/MS	By MS/MS	3.1	4.5	2.6	8.9	6.9	5.4
P24752	P24752	1	1	1	Acetyl-CoA acetyltransferase, mitochondrial	ACAT1	sp|P24752|THIL_HUMAN Acetyl-CoA acetyltransferase, mitochondrial OS=Homo sapiens OX=9606 GN=ACAT1 PE=1 SV=1	1	1	1	1	0	0	1	1	1	1	0	0	1	1	1	1	0	0	1	1	1	1	3	3	3	45.199	427	427	0.0062652	1.681			By MS/MS	By matching	By MS/MS	By MS/MS	0	0	3	3	3	3
P24855	P24855	2	2	2	Deoxyribonuclease-1	DNASE1	sp|P24855|DNAS1_HUMAN Deoxyribonuclease-1 OS=Homo sapiens OX=9606 GN=DNASE1 PE=1 SV=1	1	2	2	2	2	2	2	2	2	2	2	2	2	2	2	2	2	2	2	2	2	2	12.8	12.8	12.8	31.433	282	282	0	20.603	By MS/MS	By MS/MS	By MS/MS	By MS/MS	By MS/MS	By MS/MS	12.8	12.8	12.8	12.8	12.8	12.8
P25092	P25092	2	1	1	Heat-stable enterotoxin receptor	GUCY2C	sp|P25092|GUC2C_HUMAN Guanylyl cyclase C OS=Homo sapiens OX=9606 GN=GUCY2C PE=1 SV=2	1	2	1	1	1	0	1	2	2	2	1	0	0	1	1	1	1	0	0	1	1	1	2.2	1	1	123.4	1073	1073	0.0022099	2.1696	By MS/MS		By matching	By MS/MS	By matching	By MS/MS	1	0	1.2	2.2	2.2	2.2
P25098;P35626	P25098;P35626	3;2	3;2	3;2	Beta-adrenergic receptor kinase 1;Beta-adrenergic receptor kinase 2	ADRBK1;ADRBK2	sp|P25098|ARBK1_HUMAN Beta-adrenergic receptor kinase 1 OS=Homo sapiens OX=9606 GN=GRK2 PE=1 SV=2;sp|P35626|ARBK2_HUMAN Beta-adrenergic receptor kinase 2 OS=Homo sapiens OX=9606 GN=GRK3 PE=1 SV=2	2	3	3	3	1	1	2	3	1	1	1	1	2	3	1	1	1	1	2	3	1	1	4.9	4.9	4.9	79.573	689	689;688	0.00082988	3.6756	By matching	By MS/MS	By MS/MS	By MS/MS	By MS/MS	By MS/MS	1.7	1.7	3.5	4.9	1.7	1.7
P25116	P25116	2	2	2	Proteinase-activated receptor 1	F2R	sp|P25116|PAR1_HUMAN Proteinase-activated receptor 1 OS=Homo sapiens OX=9606 GN=F2R PE=1 SV=2	1	2	2	2	1	2	1	2	2	2	1	2	1	2	2	2	1	2	1	2	2	2	7.5	7.5	7.5	47.44	425	425	0	44.49	By matching	By matching	By matching	By matching	By MS/MS	By MS/MS	3.3	7.5	3.3	7.5	7.5	7.5
P25311	P25311	6	6	6	Zinc-alpha-2-glycoprotein	AZGP1	sp|P25311|ZA2G_HUMAN Zinc-alpha-2-glycoprotein OS=Homo sapiens OX=9606 GN=AZGP1 PE=1 SV=2	1	6	6	6	6	6	6	6	6	5	6	6	6	6	6	5	6	6	6	6	6	5	21.8	21.8	21.8	34.258	298	298	0	19.732	By MS/MS	By MS/MS	By MS/MS	By MS/MS	By MS/MS	By MS/MS	21.8	21.8	21.8	21.8	21.8	18.5
P25325	P25325	3	3	3	3-mercaptopyruvate sulfurtransferase	MPST	sp|P25325|THTM_HUMAN 3-mercaptopyruvate sulfurtransferase OS=Homo sapiens OX=9606 GN=MPST PE=1 SV=3	1	3	3	3	2	3	2	2	2	2	2	3	2	2	2	2	2	3	2	2	2	2	9.1	9.1	9.1	33.178	297	297	0.00085948	4.1517	By MS/MS	By MS/MS	By MS/MS	By MS/MS	By MS/MS	By MS/MS	6.7	9.1	6.7	6.7	6.7	6.7
P25398	P25398	4	4	4	40S ribosomal protein S12	RPS12	sp|P25398|RS12_HUMAN 40S ribosomal protein S12 OS=Homo sapiens OX=9606 GN=RPS12 PE=1 SV=3	1	4	4	4	4	4	4	4	4	4	4	4	4	4	4	4	4	4	4	4	4	4	32.6	32.6	32.6	14.515	132	132	0	5.8813	By MS/MS	By MS/MS	By MS/MS	By MS/MS	By MS/MS	By MS/MS	32.6	32.6	32.6	32.6	32.6	32.6
P25445	P25445	1	1	1	Tumor necrosis factor receptor superfamily member 6	FAS	sp|P25445|TNR6_HUMAN Tumor necrosis factor receptor superfamily member 6 OS=Homo sapiens OX=9606 GN=FAS PE=1 SV=1	1	1	1	1	0	0	0	1	0	0	0	0	0	1	0	0	0	0	0	1	0	0	4.5	4.5	4.5	37.732	335	335	0.0022059	2.1556				By MS/MS			0	0	0	4.5	0	0
P25685	P25685	6	6	5	DnaJ homolog subfamily B member 1	DNAJB1	sp|P25685|DNJB1_HUMAN DnaJ homolog subfamily B member 1 OS=Homo sapiens OX=9606 GN=DNAJB1 PE=1 SV=4	1	6	6	5	5	4	5	4	5	5	5	4	5	4	5	5	4	3	4	3	4	4	17.1	17.1	13.5	38.044	340	340	0	12.626	By MS/MS	By MS/MS	By MS/MS	By MS/MS	By MS/MS	By MS/MS	14.1	11.8	14.7	11.8	14.1	14.1
P25686	P25686	4	4	4	DnaJ homolog subfamily B member 2	DNAJB2	sp|P25686|DNJB2_HUMAN DnaJ homolog subfamily B member 2 OS=Homo sapiens OX=9606 GN=DNAJB2 PE=1 SV=3	1	4	4	4	3	3	3	2	2	2	3	3	3	2	2	2	3	3	3	2	2	2	16	16	16	35.58	324	324	0	9.0605	By MS/MS	By MS/MS	By MS/MS	By MS/MS	By MS/MS	By MS/MS	9.9	12.3	12.3	9.9	8.6	6.2
P25705	P25705	2	2	2	ATP synthase subunit alpha, mitochondrial	ATP5A1	sp|P25705|ATPA_HUMAN ATP synthase subunit alpha, mitochondrial OS=Homo sapiens OX=9606 GN=ATP5F1A PE=1 SV=1	1	2	2	2	2	0	2	0	0	0	2	0	2	0	0	0	2	0	2	0	0	0	4	4	4	59.75	553	553	0	5.5826	By MS/MS		By MS/MS				4	0	4	0	0	0
P25774	P25774	5	5	5	Cathepsin S	CTSS	sp|P25774|CATS_HUMAN Cathepsin S OS=Homo sapiens OX=9606 GN=CTSS PE=1 SV=3	1	5	5	5	5	5	5	2	3	2	5	5	5	2	3	2	5	5	5	2	3	2	19.6	19.6	19.6	37.495	331	331	0	22.703	By MS/MS	By MS/MS	By MS/MS	By MS/MS	By MS/MS	By MS/MS	19.6	19.6	19.6	7.3	11.8	6.3
P25786	P25786	7	7	7	Proteasome subunit alpha type-1	PSMA1	sp|P25786|PSA1_HUMAN Proteasome subunit alpha type-1 OS=Homo sapiens OX=9606 GN=PSMA1 PE=1 SV=1	1	7	7	7	7	7	7	5	5	6	7	7	7	5	5	6	7	7	7	5	5	6	31.6	31.6	31.6	29.555	263	263	0	56.931	By MS/MS	By MS/MS	By MS/MS	By MS/MS	By MS/MS	By MS/MS	31.6	31.6	31.6	20.2	21.3	25.9
P25787	P25787	1	1	1	Proteasome subunit alpha type-2	PSMA2	sp|P25787|PSA2_HUMAN Proteasome subunit alpha type-2 OS=Homo sapiens OX=9606 GN=PSMA2 PE=1 SV=2	1	1	1	1	1	1	1	1	1	1	1	1	1	1	1	1	1	1	1	1	1	1	6	6	6	25.898	234	234	0	12.244	By matching	By matching	By MS/MS	By MS/MS	By MS/MS	By MS/MS	6	6	6	6	6	6
P25788	P25788	6	6	6	Proteasome subunit alpha type-3	PSMA3	sp|P25788|PSA3_HUMAN Proteasome subunit alpha type-3 OS=Homo sapiens OX=9606 GN=PSMA3 PE=1 SV=2	1	6	6	6	5	5	5	6	5	6	5	5	5	6	5	6	5	5	5	6	5	6	25.9	25.9	25.9	28.433	255	255	0	49.214	By MS/MS	By MS/MS	By MS/MS	By MS/MS	By MS/MS	By MS/MS	22.7	22.7	22.7	25.9	22.7	25.9
P25789	P25789	7	7	7	Proteasome subunit alpha type-4	PSMA4	sp|P25789|PSA4_HUMAN Proteasome subunit alpha type-4 OS=Homo sapiens OX=9606 GN=PSMA4 PE=1 SV=1	1	7	7	7	6	5	6	5	4	4	6	5	6	5	4	4	6	5	6	5	4	4	25.7	25.7	25.7	29.483	261	261	0	11.821	By MS/MS	By MS/MS	By MS/MS	By MS/MS	By MS/MS	By MS/MS	22.6	19.9	23	19.9	16.1	16.1
P25815	P25815	2	2	2	Protein S100-P	S100P	sp|P25815|S100P_HUMAN Protein S100-P OS=Homo sapiens OX=9606 GN=S100P PE=1 SV=2	1	2	2	2	2	2	2	2	2	2	2	2	2	2	2	2	2	2	2	2	2	2	24.2	24.2	24.2	10.4	95	95	0	22.753	By MS/MS	By MS/MS	By MS/MS	By MS/MS	By MS/MS	By MS/MS	24.2	24.2	24.2	24.2	24.2	24.2
P25942	P25942	1	1	1	Tumor necrosis factor receptor superfamily member 5	CD40	sp|P25942|TNR5_HUMAN Tumor necrosis factor receptor superfamily member 5 OS=Homo sapiens OX=9606 GN=CD40 PE=1 SV=1	1	1	1	1	0	0	1	0	0	0	0	0	1	0	0	0	0	0	1	0	0	0	10.5	10.5	10.5	30.619	277	277	0	9.3742			By MS/MS				0	0	10.5	0	0	0
P26006	P26006	16	16	16	Integrin alpha-3;Integrin alpha-3 heavy chain;Integrin alpha-3 light chain	ITGA3	sp|P26006|ITA3_HUMAN Integrin alpha-3 OS=Homo sapiens OX=9606 GN=ITGA3 PE=1 SV=5	1	16	16	16	13	13	14	16	16	16	13	13	14	16	16	16	13	13	14	16	16	16	16.7	16.7	16.7	116.61	1051	1051	0	48.728	By MS/MS	By MS/MS	By MS/MS	By MS/MS	By MS/MS	By MS/MS	13.8	13.9	14.7	16.7	16.7	16.7
P26012	P26012	10	10	10	Integrin beta-8	ITGB8	sp|P26012|ITB8_HUMAN Integrin beta-8 OS=Homo sapiens OX=9606 GN=ITGB8 PE=1 SV=1	1	10	10	10	8	6	7	9	10	10	8	6	7	9	10	10	8	6	7	9	10	10	17.3	17.3	17.3	85.631	769	769	0	85.893	By MS/MS	By MS/MS	By MS/MS	By MS/MS	By MS/MS	By MS/MS	12.5	9.8	11.4	15.5	17.3	17.3
P26038	P26038	48	48	34	Moesin	MSN	sp|P26038|MOES_HUMAN Moesin OS=Homo sapiens OX=9606 GN=MSN PE=1 SV=3	1	48	48	34	44	44	45	45	41	43	44	44	45	45	41	43	31	31	31	31	28	29	66.7	66.7	50.4	67.819	577	577	0	323.31	By MS/MS	By MS/MS	By MS/MS	By MS/MS	By MS/MS	By MS/MS	65	65	65	64	58.6	57.9
P26196	P26196	2	2	2	Probable ATP-dependent RNA helicase DDX6	DDX6	sp|P26196|DDX6_HUMAN Probable ATP-dependent RNA helicase DDX6 OS=Homo sapiens OX=9606 GN=DDX6 PE=1 SV=2	1	2	2	2	2	2	2	1	2	2	2	2	2	1	2	2	2	2	2	1	2	2	6	6	6	54.416	483	483	0.00081566	3.4741	By MS/MS	By MS/MS	By MS/MS	By matching	By MS/MS	By MS/MS	6	6	6	3.9	6	6
P26440	P26440	2	2	2	Isovaleryl-CoA dehydrogenase, mitochondrial	IVD	sp|P26440|IVD_HUMAN Isovaleryl-CoA dehydrogenase, mitochondrial OS=Homo sapiens OX=9606 GN=IVD PE=1 SV=2	1	2	2	2	1	2	2	0	0	0	1	2	2	0	0	0	1	2	2	0	0	0	4.9	4.9	4.9	46.65	426	426	0.0052393	1.7289	By MS/MS	By MS/MS	By MS/MS				2.8	4.9	4.9	0	0	0
P26447	P26447	3	3	3	Protein S100-A4	S100A4	sp|P26447|S10A4_HUMAN Protein S100-A4 OS=Homo sapiens OX=9606 GN=S100A4 PE=1 SV=1	1	3	3	3	3	3	3	3	3	3	3	3	3	3	3	3	3	3	3	3	3	3	27.7	27.7	27.7	11.728	101	101	0	6.4872	By MS/MS	By MS/MS	By MS/MS	By MS/MS	By MS/MS	By MS/MS	27.7	27.7	27.7	27.7	27.7	27.7
P26583	P26583	1	1	1	High mobility group protein B2	HMGB2	sp|P26583|HMGB2_HUMAN High mobility group protein B2 OS=Homo sapiens OX=9606 GN=HMGB2 PE=1 SV=2	1	1	1	1	1	1	1	0	0	0	1	1	1	0	0	0	1	1	1	0	0	0	6.2	6.2	6.2	24.033	209	209	0.0014859	2.261	By MS/MS	By MS/MS	By MS/MS				6.2	6.2	6.2	0	0	0
P26599;O95758	P26599;O95758	2;1	2;1	2;1	Polypyrimidine tract-binding protein 1;Polypyrimidine tract-binding protein 3	PTBP1;PTBP3	sp|P26599|PTBP1_HUMAN Polypyrimidine tract-binding protein 1 OS=Homo sapiens OX=9606 GN=PTBP1 PE=1 SV=2;sp|O95758|PTBP3_HUMAN Polypyrimidine tract-binding protein 3 OS=Homo sapiens OX=9606 GN=PTBP3 PE=1 SV=2	2	2	2	2	2	1	2	1	2	2	2	1	2	1	2	2	2	1	2	1	2	2	5	5	5	59.632	557	557;552	0.0032293	1.9907	By MS/MS	By matching	By matching	By matching	By matching	By matching	5	1.4	5	1.4	5	5
P26639	P26639	6	6	6	Threonine--tRNA ligase, cytoplasmic	TARS	sp|P26639|SYTC_HUMAN Threonine--tRNA ligase 1, cytoplasmic OS=Homo sapiens OX=9606 GN=TARS1 PE=1 SV=3	1	6	6	6	4	4	5	4	3	3	4	4	5	4	3	3	4	4	5	4	3	3	10	10	10	83.434	723	723	0	22.346	By MS/MS	By MS/MS	By MS/MS	By MS/MS	By MS/MS	By MS/MS	6.5	7.2	8.2	6.9	5.4	5.4
P26641	P26641	5	5	5	Elongation factor 1-gamma	EEF1G	sp|P26641|EF1G_HUMAN Elongation factor 1-gamma OS=Homo sapiens OX=9606 GN=EEF1G PE=1 SV=3	1	5	5	5	3	4	4	2	4	4	3	4	4	2	4	4	3	4	4	2	4	4	9.6	9.6	9.6	50.118	437	437	0	7.4834	By MS/MS	By MS/MS	By MS/MS	By MS/MS	By MS/MS	By MS/MS	6.4	6.6	9.4	4.8	9.4	9.4
P27105	P27105	14	14	14	Erythrocyte band 7 integral membrane protein	STOM	sp|P27105|STOM_HUMAN Stomatin OS=Homo sapiens OX=9606 GN=STOM PE=1 SV=3	1	14	14	14	14	14	14	14	14	14	14	14	14	14	14	14	14	14	14	14	14	14	49	49	49	31.73	288	288	0	239.4	By MS/MS	By MS/MS	By MS/MS	By MS/MS	By MS/MS	By MS/MS	49	49	49	49	49	49
P27169	P27169	2	2	2	Serum paraoxonase/arylesterase 1	PON1	sp|P27169|PON1_HUMAN Serum paraoxonase/arylesterase 1 OS=Homo sapiens OX=9606 GN=PON1 PE=1 SV=3	1	2	2	2	0	0	0	2	1	1	0	0	0	2	1	1	0	0	0	2	1	1	7	7	7	39.731	355	355	0	4.7936				By MS/MS	By MS/MS	By MS/MS	0	0	0	7	3.9	3.9
P27216	P27216	15	14	14	Annexin A13	ANXA13	sp|P27216|ANX13_HUMAN Annexin A13 OS=Homo sapiens OX=9606 GN=ANXA13 PE=1 SV=3	1	15	14	14	13	13	13	11	12	11	12	12	12	10	11	10	12	12	12	10	11	10	45.6	42.7	42.7	35.415	316	316	0	67.602	By MS/MS	By MS/MS	By MS/MS	By MS/MS	By MS/MS	By MS/MS	40.8	40.2	40.5	36.4	38	35.1
P27348	P27348	13	11	11	14-3-3 protein theta	YWHAQ	sp|P27348|1433T_HUMAN 14-3-3 protein theta OS=Homo sapiens OX=9606 GN=YWHAQ PE=1 SV=1	1	13	11	11	13	13	13	12	12	12	11	11	11	10	10	10	11	11	11	10	10	10	50.2	42.4	42.4	27.764	245	245	0	214.73	By MS/MS	By MS/MS	By MS/MS	By MS/MS	By MS/MS	By MS/MS	50.2	50.2	50.2	50.2	50.2	50.2
P27361	P27361	7	6	6	Mitogen-activated protein kinase 3	MAPK3	sp|P27361|MK03_HUMAN Mitogen-activated protein kinase 3 OS=Homo sapiens OX=9606 GN=MAPK3 PE=1 SV=4	1	7	6	6	6	6	5	5	5	5	5	5	4	4	4	4	5	5	4	4	4	4	21.4	18.2	18.2	43.135	379	379	0	7.4976	By MS/MS	By MS/MS	By MS/MS	By MS/MS	By MS/MS	By MS/MS	19	19	14	14	16.6	16.6
P27449	P27449	1	1	1	V-type proton ATPase 16 kDa proteolipid subunit	ATP6V0C	sp|P27449|VATL_HUMAN V-type proton ATPase 16 kDa proteolipid subunit c OS=Homo sapiens OX=9606 GN=ATP6V0C PE=1 SV=1	1	1	1	1	0	0	1	0	0	0	0	0	1	0	0	0	0	0	1	0	0	0	11.6	11.6	11.6	15.736	155	155	0.0049628	1.8712			By MS/MS				0	0	11.6	0	0	0
P27482	P27482	5	2	2	Calmodulin-like protein 3	CALML3	sp|P27482|CALL3_HUMAN Calmodulin-like protein 3 OS=Homo sapiens OX=9606 GN=CALML3 PE=1 SV=2	1	5	2	2	2	3	2	4	3	4	0	1	0	1	0	2	0	1	0	1	0	2	34.2	18.8	18.8	16.891	149	149	0	43.619	By matching	By matching	By matching	By matching	By matching	By MS/MS	10.1	21.5	10.1	22.8	15.4	28.9
P27487	P27487	37	37	37	Dipeptidyl peptidase 4;Dipeptidyl peptidase 4 membrane form;Dipeptidyl peptidase 4 soluble form	DPP4	sp|P27487|DPP4_HUMAN Dipeptidyl peptidase 4 OS=Homo sapiens OX=9606 GN=DPP4 PE=1 SV=2	1	37	37	37	37	35	37	35	35	34	37	35	37	35	35	34	37	35	37	35	35	34	41.9	41.9	41.9	88.278	766	766	0	323.31	By MS/MS	By MS/MS	By MS/MS	By MS/MS	By MS/MS	By MS/MS	41.9	40.9	41.9	41.8	40.7	40.9
P27540	P27540	1	1	1	Aryl hydrocarbon receptor nuclear translocator	ARNT	sp|P27540|ARNT_HUMAN Aryl hydrocarbon receptor nuclear translocator OS=Homo sapiens OX=9606 GN=ARNT PE=1 SV=1	1	1	1	1	0	0	0	1	0	0	0	0	0	1	0	0	0	0	0	1	0	0	1.3	1.3	1.3	86.636	789	789	1	-2				By MS/MS			0	0	0	1.3	0	0
P27635	P27635	1	1	1	60S ribosomal protein L10	RPL10	sp|P27635|RL10_HUMAN 60S ribosomal protein L10 OS=Homo sapiens OX=9606 GN=RPL10 PE=1 SV=5	1	1	1	1	1	1	1	1	1	1	1	1	1	1	1	1	1	1	1	1	1	1	6.1	6.1	6.1	24.577	214	214	0	5.146	By MS/MS	By matching	By MS/MS	By MS/MS	By MS/MS	By MS/MS	6.1	6.1	6.1	6.1	6.1	6.1
P27701	P27701	4	4	4	CD82 antigen	CD82	sp|P27701|CD82_HUMAN CD82 antigen OS=Homo sapiens OX=9606 GN=CD82 PE=1 SV=1	1	4	4	4	3	3	2	3	3	3	3	3	2	3	3	3	3	3	2	3	3	3	16.1	16.1	16.1	29.625	267	267	0	29.503	By MS/MS	By MS/MS	By MS/MS	By MS/MS	By MS/MS	By MS/MS	16.1	16.1	8.6	8.6	16.1	8.6
P27797	P27797	7	7	7	Calreticulin	CALR	sp|P27797|CALR_HUMAN Calreticulin OS=Homo sapiens OX=9606 GN=CALR PE=1 SV=1	1	7	7	7	7	6	4	5	6	6	7	6	4	5	6	6	7	6	4	5	6	6	21.6	21.6	21.6	48.141	417	417	0	25.358	By MS/MS	By MS/MS	By MS/MS	By MS/MS	By MS/MS	By MS/MS	21.6	18.7	11.3	13.9	15.8	15.8
P27824	P27824	4	4	4	Calnexin	CANX	sp|P27824|CALX_HUMAN Calnexin OS=Homo sapiens OX=9606 GN=CANX PE=1 SV=2	1	4	4	4	4	4	3	4	4	4	4	4	3	4	4	4	4	4	3	4	4	4	6.2	6.2	6.2	67.567	592	592	0	10.772	By MS/MS	By MS/MS	By MS/MS	By MS/MS	By MS/MS	By MS/MS	6.2	6.2	4.2	6.2	6.2	6.2
P27986	P27986	3	2	1	Phosphatidylinositol 3-kinase regulatory subunit alpha	PIK3R1	sp|P27986|P85A_HUMAN Phosphatidylinositol 3-kinase regulatory subunit alpha OS=Homo sapiens OX=9606 GN=PIK3R1 PE=1 SV=2	1	3	2	1	3	3	2	3	3	2	2	2	1	2	2	1	1	1	0	1	1	0	5.1	3.2	1.5	83.597	724	724	0	11.175	By MS/MS	By MS/MS	By MS/MS	By MS/MS	By MS/MS	By MS/MS	5.1	5.1	3.6	5.1	5.1	3.6
P28062	P28062	2	2	2	Proteasome subunit beta type-8	PSMB8	sp|P28062|PSB8_HUMAN Proteasome subunit beta type-8 OS=Homo sapiens OX=9606 GN=PSMB8 PE=1 SV=3	1	2	2	2	2	2	2	2	2	1	2	2	2	2	2	1	2	2	2	2	2	1	6.5	6.5	6.5	30.354	276	276	0	9.7418	By MS/MS	By MS/MS	By matching	By MS/MS	By matching	By matching	6.5	6.5	6.5	6.5	6.5	5.1
P28066	P28066	8	8	8	Proteasome subunit alpha type-5	PSMA5	sp|P28066|PSA5_HUMAN Proteasome subunit alpha type-5 OS=Homo sapiens OX=9606 GN=PSMA5 PE=1 SV=3	1	8	8	8	8	8	8	8	8	7	8	8	8	8	8	7	8	8	8	8	8	7	41.5	41.5	41.5	26.411	241	241	0	82.896	By MS/MS	By MS/MS	By MS/MS	By MS/MS	By MS/MS	By MS/MS	41.5	41.5	41.5	41.5	41.5	33.2
P28067	P28067	1	1	1	HLA class II histocompatibility antigen, DM alpha chain	HLA-DMA	sp|P28067|DMA_HUMAN HLA class II histocompatibility antigen, DM alpha chain OS=Homo sapiens OX=9606 GN=HLA-DMA PE=1 SV=1	1	1	1	1	1	1	1	1	1	1	1	1	1	1	1	1	1	1	1	1	1	1	5	5	5	29.194	261	261	0	14.817	By MS/MS	By MS/MS	By MS/MS	By MS/MS	By MS/MS	By MS/MS	5	5	5	5	5	5
P28068	P28068	3	3	3	HLA class II histocompatibility antigen, DM beta chain	HLA-DMB	sp|P28068|DMB_HUMAN HLA class II histocompatibility antigen, DM beta chain OS=Homo sapiens OX=9606 GN=HLA-DMB PE=1 SV=2	1	3	3	3	3	3	2	3	3	3	3	3	2	3	3	3	3	3	2	3	3	3	13.3	13.3	13.3	28.931	263	263	0	9.5082	By MS/MS	By MS/MS	By MS/MS	By MS/MS	By MS/MS	By MS/MS	13.3	13.3	8.4	13.3	13.3	13.3
P28070	P28070	2	2	2	Proteasome subunit beta type-4	PSMB4	sp|P28070|PSB4_HUMAN Proteasome subunit beta type-4 OS=Homo sapiens OX=9606 GN=PSMB4 PE=1 SV=4	1	2	2	2	2	2	2	2	2	2	2	2	2	2	2	2	2	2	2	2	2	2	11.4	11.4	11.4	29.204	264	264	0	9.979	By MS/MS	By MS/MS	By MS/MS	By matching	By MS/MS	By MS/MS	11.4	11.4	11.4	11.4	11.4	11.4
P28072	P28072	2	2	2	Proteasome subunit beta type-6	PSMB6	sp|P28072|PSB6_HUMAN Proteasome subunit beta type-6 OS=Homo sapiens OX=9606 GN=PSMB6 PE=1 SV=4	1	2	2	2	2	2	2	2	2	2	2	2	2	2	2	2	2	2	2	2	2	2	8.8	8.8	8.8	25.357	239	239	0.0035714	1.9478	By MS/MS	By MS/MS	By MS/MS	By MS/MS	By MS/MS	By MS/MS	8.8	8.8	8.8	8.8	8.8	8.8
P28074	P28074	3	3	3	Proteasome subunit beta type-5	PSMB5	sp|P28074|PSB5_HUMAN Proteasome subunit beta type-5 OS=Homo sapiens OX=9606 GN=PSMB5 PE=1 SV=3	1	3	3	3	3	2	2	2	2	2	3	2	2	2	2	2	3	2	2	2	2	2	13.3	13.3	13.3	28.48	263	263	0	6.0461	By MS/MS	By MS/MS	By MS/MS	By MS/MS	By MS/MS	By MS/MS	13.3	8.4	8.4	8.4	8.4	8.4
P28161	P28161	9	4	4	Glutathione S-transferase Mu 2	GSTM2	sp|P28161|GSTM2_HUMAN Glutathione S-transferase Mu 2 OS=Homo sapiens OX=9606 GN=GSTM2 PE=1 SV=2	1	9	4	4	9	9	8	9	9	9	4	4	4	4	4	4	4	4	4	4	4	4	48.2	21.6	21.6	25.744	218	218	0	13.51	By MS/MS	By MS/MS	By MS/MS	By MS/MS	By MS/MS	By MS/MS	48.2	48.2	44	48.2	48.2	48.2
P28332	P28332	7	7	7	Alcohol dehydrogenase 6	ADH6	sp|P28332|ADH6_HUMAN Alcohol dehydrogenase 6 OS=Homo sapiens OX=9606 GN=ADH6 PE=1 SV=3	1	7	7	7	7	5	7	5	6	6	7	5	7	5	6	6	7	5	7	5	6	6	23.6	23.6	23.6	39.072	368	368	0	62.537	By MS/MS	By MS/MS	By MS/MS	By MS/MS	By MS/MS	By MS/MS	23.6	18.5	23.6	17.7	20.9	20.9
P28482	P28482	8	8	7	Mitogen-activated protein kinase 1	MAPK1	sp|P28482|MK01_HUMAN Mitogen-activated protein kinase 1 OS=Homo sapiens OX=9606 GN=MAPK1 PE=1 SV=3	1	8	8	7	5	6	7	5	7	7	5	6	7	5	7	7	4	5	6	4	6	6	23.1	23.1	19.7	41.389	360	360	0	17.86	By MS/MS	By MS/MS	By MS/MS	By MS/MS	By MS/MS	By MS/MS	14.7	17.2	21.1	14.2	20.6	20.6
P28676	P28676	7	7	7	Grancalcin	GCA	sp|P28676|GRAN_HUMAN Grancalcin OS=Homo sapiens OX=9606 GN=GCA PE=1 SV=2	1	7	7	7	7	7	7	6	7	6	7	7	7	6	7	6	7	7	7	6	7	6	36.4	36.4	36.4	24.01	217	217	0	43.17	By MS/MS	By MS/MS	By MS/MS	By MS/MS	By MS/MS	By MS/MS	36.4	36.4	36.4	30.9	36.4	30.9
P28799	P28799	3	3	3	Granulins;Acrogranin;Paragranulin;Granulin-1;Granulin-2;Granulin-3;Granulin-4;Granulin-5;Granulin-6;Granulin-7	GRN	sp|P28799|GRN_HUMAN Progranulin OS=Homo sapiens OX=9606 GN=GRN PE=1 SV=2	1	3	3	3	2	3	3	1	1	1	2	3	3	1	1	1	2	3	3	1	1	1	11	11	11	63.544	593	593	0	105.37	By MS/MS	By MS/MS	By MS/MS	By MS/MS	By MS/MS	By MS/MS	7.9	11	11	5.7	5.7	5.7
P28838	P28838	17	17	17	Cytosol aminopeptidase	LAP3	sp|P28838|AMPL_HUMAN Cytosol aminopeptidase OS=Homo sapiens OX=9606 GN=LAP3 PE=1 SV=3	1	17	17	17	14	15	15	14	15	15	14	15	15	14	15	15	14	15	15	14	15	15	39.3	39.3	39.3	56.166	519	519	0	153.01	By MS/MS	By MS/MS	By MS/MS	By MS/MS	By MS/MS	By MS/MS	35.8	35.6	38	35.6	37.2	37.2
P28907	P28907	7	7	7	ADP-ribosyl cyclase/cyclic ADP-ribose hydrolase 1	CD38	sp|P28907|CD38_HUMAN ADP-ribosyl cyclase/cyclic ADP-ribose hydrolase 1 OS=Homo sapiens OX=9606 GN=CD38 PE=1 SV=2	1	7	7	7	7	7	7	7	7	7	7	7	7	7	7	7	7	7	7	7	7	7	23.7	23.7	23.7	34.328	300	300	0	19.47	By MS/MS	By MS/MS	By MS/MS	By MS/MS	By MS/MS	By MS/MS	23.7	23.7	23.7	23.7	23.7	23.7
P29218	P29218	4	4	4	Inositol monophosphatase 1	IMPA1	sp|P29218|IMPA1_HUMAN Inositol monophosphatase 1 OS=Homo sapiens OX=9606 GN=IMPA1 PE=1 SV=1	1	4	4	4	3	4	4	4	4	4	3	4	4	4	4	4	3	4	4	4	4	4	13.4	13.4	13.4	30.188	277	277	0	6.135	By MS/MS	By MS/MS	By MS/MS	By MS/MS	By MS/MS	By MS/MS	10.5	13.4	13.4	13.4	13.4	13.4
P29317;P54762;P54760;Q15375;P54753;Q9UF33;P29323;Q06187;P29320;P54764;P29322;P54756	P29317;P54762;P54760;Q15375;P54753;Q9UF33;P29323	4;2;2;2;2;2;2;1;1;1;1;1	4;2;2;2;2;2;2;1;1;1;1;1	4;2;2;2;2;2;2;1;1;1;1;1	Ephrin type-A receptor 2;Ephrin type-B receptor 1;Ephrin type-B receptor 4;Ephrin type-A receptor 7;Ephrin type-B receptor 3;Ephrin type-A receptor 6;Ephrin type-B receptor 2	EPHA2;EPHB1;EPHB4;EPHA7;EPHB3;EPHA6;EPHB2	sp|P29317|EPHA2_HUMAN Ephrin type-A receptor 2 OS=Homo sapiens OX=9606 GN=EPHA2 PE=1 SV=2;sp|P54762|EPHB1_HUMAN Ephrin type-B receptor 1 OS=Homo sapiens OX=9606 GN=EPHB1 PE=1 SV=1;sp|P54760|EPHB4_HUMAN Ephrin type-B receptor 4 OS=Homo sapiens OX=9606 GN=EP	12	4	4	4	3	2	3	3	4	3	3	2	3	3	4	3	3	2	3	3	4	3	4.6	4.6	4.6	108.27	976	976;984;987;998;998;1036;1055;659;983;986;1005;1037	0	7.482	By MS/MS	By MS/MS	By MS/MS	By MS/MS	By MS/MS	By MS/MS	3.2	1.9	3.2	3.2	4.6	3.5
P29350	P29350	11	11	11	Tyrosine-protein phosphatase non-receptor type 6	PTPN6	sp|P29350|PTN6_HUMAN Tyrosine-protein phosphatase non-receptor type 6 OS=Homo sapiens OX=9606 GN=PTPN6 PE=1 SV=1	1	11	11	11	11	11	10	9	10	10	11	11	10	9	10	10	11	11	10	9	10	10	21.8	21.8	21.8	67.56	595	595	0	49.223	By MS/MS	By MS/MS	By MS/MS	By MS/MS	By MS/MS	By MS/MS	21.8	21.8	20.3	18.7	20.2	20.3
P29353;Q6S5L8	P29353	5;1	5;1	5;1	SHC-transforming protein 1	SHC1	sp|P29353|SHC1_HUMAN SHC-transforming protein 1 OS=Homo sapiens OX=9606 GN=SHC1 PE=1 SV=4	2	5	5	5	5	4	5	3	3	3	5	4	5	3	3	3	5	4	5	3	3	3	11.8	11.8	11.8	62.821	583	583;630	0	12.59	By MS/MS	By MS/MS	By MS/MS	By MS/MS	By MS/MS	By MS/MS	11.8	8.4	11.8	8.6	8.6	8.6
P29373	P29373	8	8	8	Cellular retinoic acid-binding protein 2	CRABP2	sp|P29373|RABP2_HUMAN Cellular retinoic acid-binding protein 2 OS=Homo sapiens OX=9606 GN=CRABP2 PE=1 SV=2	1	8	8	8	8	8	7	7	8	8	8	8	7	7	8	8	8	8	7	7	8	8	49.3	49.3	49.3	15.693	138	138	0	107.16	By MS/MS	By MS/MS	By MS/MS	By MS/MS	By MS/MS	By MS/MS	49.3	49.3	49.3	43.5	49.3	49.3
P29375	P29375	1	1	1	Lysine-specific demethylase 5A	KDM5A	sp|P29375|KDM5A_HUMAN Lysine-specific demethylase 5A OS=Homo sapiens OX=9606 GN=KDM5A PE=1 SV=3	1	1	1	1	1	1	1	1	1	1	1	1	1	1	1	1	1	1	1	1	1	1	0.4	0.4	0.4	192.09	1690	1690	0.0049452	1.8348	By MS/MS	By MS/MS	By MS/MS	By MS/MS	By MS/MS	By MS/MS	0.4	0.4	0.4	0.4	0.4	0.4
P29401	P29401	13	13	13	Transketolase	TKT	sp|P29401|TKT_HUMAN Transketolase OS=Homo sapiens OX=9606 GN=TKT PE=1 SV=3	1	13	13	13	12	11	12	12	12	12	12	11	12	12	12	12	12	11	12	12	12	12	28.3	28.3	28.3	67.877	623	623	0	119.21	By MS/MS	By MS/MS	By MS/MS	By MS/MS	By MS/MS	By MS/MS	27	23	27.1	25.4	27.1	27.1
P29508;P48594	P29508;P48594	5;3	5;3	5;3	Serpin B3;Serpin B4	SERPINB3;SERPINB4	sp|P29508|SPB3_HUMAN Serpin B3 OS=Homo sapiens OX=9606 GN=SERPINB3 PE=1 SV=2;sp|P48594|SPB4_HUMAN Serpin B4 OS=Homo sapiens OX=9606 GN=SERPINB4 PE=1 SV=2	2	5	5	5	4	4	3	5	4	4	4	4	3	5	4	4	4	4	3	5	4	4	11.5	11.5	11.5	44.564	390	390;390	0	18.412	By MS/MS	By MS/MS	By MS/MS	By MS/MS	By MS/MS	By MS/MS	9.5	9.5	7.7	11.5	9.5	9.5
P29597	P29597	5	5	5	Non-receptor tyrosine-protein kinase TYK2	TYK2	sp|P29597|TYK2_HUMAN Non-receptor tyrosine-protein kinase TYK2 OS=Homo sapiens OX=9606 GN=TYK2 PE=1 SV=3	1	5	5	5	2	2	3	3	4	5	2	2	3	3	4	5	2	2	3	3	4	5	4.8	4.8	4.8	133.65	1187	1187	0	5.4856	By MS/MS	By MS/MS	By MS/MS	By MS/MS	By MS/MS	By MS/MS	1.7	1.8	2.8	2.8	3.8	4.8
P29622	P29622	6	6	6	Kallistatin	SERPINA4	sp|P29622|KAIN_HUMAN Kallistatin OS=Homo sapiens OX=9606 GN=SERPINA4 PE=1 SV=3	1	6	6	6	5	5	3	6	6	6	5	5	3	6	6	6	5	5	3	6	6	6	15.5	15.5	15.5	48.541	427	427	0	24.665	By MS/MS	By MS/MS	By MS/MS	By MS/MS	By MS/MS	By MS/MS	12.2	12.2	5.2	15.5	15.5	15.5
P29692	P29692	6	6	5	Elongation factor 1-delta	EEF1D	sp|P29692|EF1D_HUMAN Elongation factor 1-delta OS=Homo sapiens OX=9606 GN=EEF1D PE=1 SV=5	1	6	6	5	5	4	4	3	3	3	5	4	4	3	3	3	4	3	3	3	3	3	28.8	28.8	24.9	31.121	281	281	0	18.686	By MS/MS	By MS/MS	By MS/MS	By MS/MS	By MS/MS	By MS/MS	24.6	19.9	16	17.4	13.2	17.4
P29728	P29728	8	8	8	2-5-oligoadenylate synthase 2	OAS2	sp|P29728|OAS2_HUMAN 2-5-oligoadenylate synthase 2 OS=Homo sapiens OX=9606 GN=OAS2 PE=1 SV=3	1	8	8	8	8	8	7	8	8	8	8	8	7	8	8	8	8	8	7	8	8	8	13.8	13.8	13.8	82.43	719	719	0	81.573	By MS/MS	By MS/MS	By MS/MS	By MS/MS	By MS/MS	By MS/MS	13.8	13.8	12.8	13.8	13.8	13.8
P29762	P29762	1	1	1	Cellular retinoic acid-binding protein 1	CRABP1	sp|P29762|RABP1_HUMAN Cellular retinoic acid-binding protein 1 OS=Homo sapiens OX=9606 GN=CRABP1 PE=1 SV=2	1	1	1	1	1	1	1	1	1	1	1	1	1	1	1	1	1	1	1	1	1	1	7.3	7.3	7.3	15.565	137	137	0.0052429	1.74	By MS/MS	By matching	By MS/MS	By MS/MS	By matching	By MS/MS	7.3	7.3	7.3	7.3	7.3	7.3
P29966	P29966	11	11	11	Myristoylated alanine-rich C-kinase substrate	MARCKS	sp|P29966|MARCS_HUMAN Myristoylated alanine-rich C-kinase substrate OS=Homo sapiens OX=9606 GN=MARCKS PE=1 SV=4	1	11	11	11	10	8	8	9	11	8	10	8	8	9	11	8	10	8	8	9	11	8	51.2	51.2	51.2	31.554	332	332	0	155.84	By MS/MS	By MS/MS	By MS/MS	By MS/MS	By MS/MS	By MS/MS	51.2	31.9	40.4	41.6	51.2	36.1
P29972	P29972	6	6	6	Aquaporin-1	AQP1	sp|P29972|AQP1_HUMAN Aquaporin-1 OS=Homo sapiens OX=9606 GN=AQP1 PE=1 SV=3	1	6	6	6	6	6	6	6	6	5	6	6	6	6	6	5	6	6	6	6	6	5	18.6	18.6	18.6	28.526	269	269	0	323.31	By MS/MS	By MS/MS	By MS/MS	By MS/MS	By MS/MS	By MS/MS	18.6	18.6	18.6	18.6	18.6	18.6
P29992	P29992	18	18	10	Guanine nucleotide-binding protein subunit alpha-11	GNA11	sp|P29992|GNA11_HUMAN Guanine nucleotide-binding protein subunit alpha-11 OS=Homo sapiens OX=9606 GN=GNA11 PE=1 SV=2	1	18	18	10	16	16	17	18	17	18	16	16	17	18	17	18	8	8	9	10	9	10	48.5	48.5	27.3	42.123	359	359	0	129.17	By MS/MS	By MS/MS	By MS/MS	By MS/MS	By MS/MS	By MS/MS	42.1	42.1	44.3	48.5	44.3	48.5
P30039	P30039	12	12	12	Phenazine biosynthesis-like domain-containing protein	PBLD	sp|P30039|PBLD_HUMAN Phenazine biosynthesis-like domain-containing protein OS=Homo sapiens OX=9606 GN=PBLD PE=1 SV=2	1	12	12	12	12	12	11	12	11	11	12	12	11	12	11	11	12	12	11	12	11	11	51.7	51.7	51.7	31.785	288	288	0	251.59	By MS/MS	By MS/MS	By MS/MS	By MS/MS	By MS/MS	By MS/MS	51.7	51.7	48.3	51.7	48.3	48.3
P30041	P30041	19	19	19	Peroxiredoxin-6	PRDX6	sp|P30041|PRDX6_HUMAN Peroxiredoxin-6 OS=Homo sapiens OX=9606 GN=PRDX6 PE=1 SV=3	1	19	19	19	18	18	19	19	18	18	18	18	19	19	18	18	18	18	19	19	18	18	77.7	77.7	77.7	25.035	224	224	0	108.83	By MS/MS	By MS/MS	By MS/MS	By MS/MS	By MS/MS	By MS/MS	77.7	77.7	77.7	77.7	77.7	74.6
P30043	P30043	5	5	5	Flavin reductase (NADPH)	BLVRB	sp|P30043|BLVRB_HUMAN Flavin reductase (NADPH) OS=Homo sapiens OX=9606 GN=BLVRB PE=1 SV=3	1	5	5	5	5	5	5	5	5	5	5	5	5	5	5	5	5	5	5	5	5	5	40.3	40.3	40.3	22.119	206	206	0	184.24	By MS/MS	By MS/MS	By MS/MS	By MS/MS	By MS/MS	By MS/MS	40.3	40.3	40.3	40.3	40.3	40.3
P30044	P30044	6	6	6	Peroxiredoxin-5, mitochondrial	PRDX5	sp|P30044|PRDX5_HUMAN Peroxiredoxin-5, mitochondrial OS=Homo sapiens OX=9606 GN=PRDX5 PE=1 SV=4	1	6	6	6	6	6	6	6	5	6	6	6	6	6	5	6	6	6	6	6	5	6	36.4	36.4	36.4	22.086	214	214	0	20.669	By MS/MS	By MS/MS	By MS/MS	By MS/MS	By MS/MS	By MS/MS	36.4	36.4	36.4	36.4	31.3	36.4
P30047	P30047	2	2	2	GTP cyclohydrolase 1 feedback regulatory protein	GCHFR	sp|P30047|GFRP_HUMAN GTP cyclohydrolase 1 feedback regulatory protein OS=Homo sapiens OX=9606 GN=GCHFR PE=1 SV=3	1	2	2	2	2	2	1	2	1	1	2	2	1	2	1	1	2	2	1	2	1	1	41.7	41.7	41.7	9.6981	84	84	0	31.99	By MS/MS	By MS/MS	By MS/MS	By MS/MS	By MS/MS	By MS/MS	41.7	41.7	29.8	41.7	29.8	29.8
P30048	P30048	5	5	5	Thioredoxin-dependent peroxide reductase, mitochondrial	PRDX3	sp|P30048|PRDX3_HUMAN Thioredoxin-dependent peroxide reductase, mitochondrial OS=Homo sapiens OX=9606 GN=PRDX3 PE=1 SV=3	1	5	5	5	5	4	3	2	1	1	5	4	3	2	1	1	5	4	3	2	1	1	20.3	20.3	20.3	27.692	256	256	0	7.3862	By MS/MS	By MS/MS	By MS/MS	By MS/MS	By MS/MS	By matching	20.3	14.8	10.2	7.8	3.1	2.7
P30050	P30050	3	3	3	60S ribosomal protein L12	RPL12	sp|P30050|RL12_HUMAN 60S ribosomal protein L12 OS=Homo sapiens OX=9606 GN=RPL12 PE=1 SV=1	1	3	3	3	2	3	3	2	0	1	2	3	3	2	0	1	2	3	3	2	0	1	35.8	35.8	35.8	17.818	165	165	0.00080289	3.2376	By matching	By MS/MS	By MS/MS	By MS/MS		By MS/MS	14.5	35.8	35.8	14.5	0	5.5
P30085	P30085	7	7	7	UMP-CMP kinase	CMPK1	sp|P30085|KCY_HUMAN UMP-CMP kinase OS=Homo sapiens OX=9606 GN=CMPK1 PE=1 SV=3	1	7	7	7	7	6	6	6	6	7	7	6	6	6	6	7	7	6	6	6	6	7	39.8	39.8	39.8	22.222	196	196	0	82.758	By MS/MS	By MS/MS	By MS/MS	By MS/MS	By MS/MS	By MS/MS	39.8	34.7	34.7	34.7	34.7	39.8
P30086	P30086	9	9	9	Phosphatidylethanolamine-binding protein 1;Hippocampal cholinergic neurostimulating peptide	PEBP1	sp|P30086|PEBP1_HUMAN Phosphatidylethanolamine-binding protein 1 OS=Homo sapiens OX=9606 GN=PEBP1 PE=1 SV=3	1	9	9	9	9	9	9	9	9	9	9	9	9	9	9	9	9	9	9	9	9	9	66.8	66.8	66.8	21.057	187	187	0	208.84	By MS/MS	By MS/MS	By MS/MS	By MS/MS	By MS/MS	By MS/MS	66.8	66.8	66.8	66.8	66.8	66.8
P30101	P30101	1	1	1	Protein disulfide-isomerase A3	PDIA3	sp|P30101|PDIA3_HUMAN Protein disulfide-isomerase A3 OS=Homo sapiens OX=9606 GN=PDIA3 PE=1 SV=4	1	1	1	1	1	1	0	1	1	0	1	1	0	1	1	0	1	1	0	1	1	0	3.2	3.2	3.2	56.782	505	505	0.00080548	3.2799	By matching	By MS/MS		By matching	By matching		3.2	3.2	0	3.2	3.2	0
P30153;P30154	P30153	16;2	16;2	16;2	Serine/threonine-protein phosphatase 2A 65 kDa regulatory subunit A alpha isoform	PPP2R1A	sp|P30153|2AAA_HUMAN Serine/threonine-protein phosphatase 2A 65 kDa regulatory subunit A alpha isoform OS=Homo sapiens OX=9606 GN=PPP2R1A PE=1 SV=4	2	16	16	16	15	15	15	16	16	16	15	15	15	16	16	16	15	15	15	16	16	16	32.6	32.6	32.6	65.308	589	589;601	0	73.659	By MS/MS	By MS/MS	By MS/MS	By MS/MS	By MS/MS	By MS/MS	30.4	30.4	29.2	32.6	32.6	32.6
P30273	P30273	2	2	2	High affinity immunoglobulin epsilon receptor subunit gamma	FCER1G	sp|P30273|FCERG_HUMAN High affinity immunoglobulin epsilon receptor subunit gamma OS=Homo sapiens OX=9606 GN=FCER1G PE=1 SV=1	1	2	2	2	2	2	1	0	0	1	2	2	1	0	0	1	2	2	1	0	0	1	23.3	23.3	23.3	9.6674	86	86	0.00080483	3.2617	By MS/MS	By MS/MS	By MS/MS			By MS/MS	23.3	23.3	10.5	0	0	10.5
P30411	P30411	2	2	2	B2 bradykinin receptor	BDKRB2	sp|P30411|BKRB2_HUMAN B2 bradykinin receptor OS=Homo sapiens OX=9606 GN=BDKRB2 PE=1 SV=2	1	2	2	2	2	2	2	2	2	2	2	2	2	2	2	2	2	2	2	2	2	2	5.1	5.1	5.1	44.46	391	391	0	5.0589	By MS/MS	By MS/MS	By MS/MS	By MS/MS	By MS/MS	By MS/MS	5.1	5.1	5.1	5.1	5.1	5.1
P30520	P30520	4	4	4	Adenylosuccinate synthetase isozyme 2	ADSS	sp|P30520|PURA2_HUMAN Adenylosuccinate synthetase isozyme 2 OS=Homo sapiens OX=9606 GN=ADSS2 PE=1 SV=3	1	4	4	4	4	4	4	4	3	4	4	4	4	4	3	4	4	4	4	4	3	4	9.2	9.2	9.2	50.097	456	456	0	7.6819	By MS/MS	By MS/MS	By MS/MS	By MS/MS	By MS/MS	By MS/MS	9.2	9.2	9.2	9.2	6.4	9.2
P30566	P30566	2	2	2	Adenylosuccinate lyase	ADSL	sp|P30566|PUR8_HUMAN Adenylosuccinate lyase OS=Homo sapiens OX=9606 GN=ADSL PE=1 SV=2	1	2	2	2	2	2	2	1	1	1	2	2	2	1	1	1	2	2	2	1	1	1	4.5	4.5	4.5	54.889	484	484	0.00081967	3.5178	By MS/MS	By MS/MS	By MS/MS	By MS/MS	By MS/MS	By MS/MS	4.5	4.5	4.5	2.3	2.3	2.3
P30613	P30613	10	9	9	Pyruvate kinase PKLR	PKLR	sp|P30613|KPYR_HUMAN Pyruvate kinase PKLR OS=Homo sapiens OX=9606 GN=PKLR PE=1 SV=2	1	10	9	9	9	9	10	7	9	6	8	8	9	6	8	5	8	8	9	6	8	5	24.6	22.6	22.6	61.829	574	574	0	45.624	By MS/MS	By MS/MS	By MS/MS	By MS/MS	By MS/MS	By MS/MS	23.2	23	24.6	18.3	23.2	16.7
P30622	P30622	1	1	1	CAP-Gly domain-containing linker protein 1	CLIP1	sp|P30622|CLIP1_HUMAN CAP-Gly domain-containing linker protein 1 OS=Homo sapiens OX=9606 GN=CLIP1 PE=1 SV=2	1	1	1	1	1	1	1	1	1	0	1	1	1	1	1	0	1	1	1	1	1	0	1	1	1	162.24	1438	1438	0.00082001	3.5209	By MS/MS	By matching	By matching	By matching	By matching		1	1	1	1	1	0
P30626	P30626	10	10	10	Sorcin	SRI	sp|P30626|SORCN_HUMAN Sorcin OS=Homo sapiens OX=9606 GN=SRI PE=1 SV=1	1	10	10	10	10	10	9	9	9	9	10	10	9	9	9	9	10	10	9	9	9	9	46	46	46	21.676	198	198	0	34.328	By MS/MS	By MS/MS	By MS/MS	By MS/MS	By MS/MS	By MS/MS	46	46	39.9	39.9	39.9	39.9
P30679	P30679	4	4	4	Guanine nucleotide-binding protein subunit alpha-15	GNA15	sp|P30679|GNA15_HUMAN Guanine nucleotide-binding protein subunit alpha-15 OS=Homo sapiens OX=9606 GN=GNA15 PE=1 SV=3	1	4	4	4	4	3	2	3	4	3	4	3	2	3	4	3	4	3	2	3	4	3	13.6	13.6	13.6	43.508	374	374	0	8.4767	By MS/MS	By MS/MS	By MS/MS	By MS/MS	By MS/MS	By MS/MS	13.6	10.2	6.7	10.2	13.6	10.2
P30711	P30711	6	6	6	Glutathione S-transferase theta-1	GSTT1	sp|P30711|GSTT1_HUMAN Glutathione S-transferase theta-1 OS=Homo sapiens OX=9606 GN=GSTT1 PE=1 SV=4	1	6	6	6	5	6	5	4	5	4	5	6	5	4	5	4	5	6	5	4	5	4	24.2	24.2	24.2	27.335	240	240	0	51.05	By MS/MS	By MS/MS	By MS/MS	By MS/MS	By MS/MS	By MS/MS	18.8	24.2	18.8	18.8	18.8	18.8
P30740;P50452;O75830	P30740	9;1;1	9;1;1	8;0;0	Leukocyte elastase inhibitor	SERPINB1	sp|P30740|ILEU_HUMAN Leukocyte elastase inhibitor OS=Homo sapiens OX=9606 GN=SERPINB1 PE=1 SV=1	3	9	9	8	9	9	9	9	9	9	9	9	9	9	9	9	8	8	8	8	8	8	25.6	25.6	23	42.741	379	379;374;405	0	42.32	By MS/MS	By MS/MS	By MS/MS	By MS/MS	By MS/MS	By MS/MS	25.6	25.6	25.6	25.6	25.6	25.6
P31146	P31146	4	4	4	Coronin-1A	CORO1A	sp|P31146|COR1A_HUMAN Coronin-1A OS=Homo sapiens OX=9606 GN=CORO1A PE=1 SV=4	1	4	4	4	4	3	4	0	0	1	4	3	4	0	0	1	4	3	4	0	0	1	10.8	10.8	10.8	51.026	461	461	0	7.9325	By MS/MS	By MS/MS	By MS/MS			By MS/MS	10.8	8.9	10.8	0	0	1.7
P31150	P31150	14	8	8	Rab GDP dissociation inhibitor alpha	GDI1	sp|P31150|GDIA_HUMAN Rab GDP dissociation inhibitor alpha OS=Homo sapiens OX=9606 GN=GDI1 PE=1 SV=2	1	14	8	8	11	12	13	13	12	10	5	6	7	7	6	5	5	6	7	7	6	5	38.9	23.7	23.7	50.582	447	447	0	92.866	By MS/MS	By MS/MS	By MS/MS	By MS/MS	By MS/MS	By MS/MS	32.7	35.3	35.8	38.5	35.3	30.6
P31151;Q86SG5	P31151	3;1	3;1	3;1	Protein S100-A7	S100A7	sp|P31151|S10A7_HUMAN Protein S100-A7 OS=Homo sapiens OX=9606 GN=S100A7 PE=1 SV=4	2	3	3	3	1	2	1	3	2	3	1	2	1	3	2	3	1	2	1	3	2	3	19.8	19.8	19.8	11.471	101	101;101	0	6.1592	By MS/MS	By MS/MS	By MS/MS	By MS/MS	By MS/MS	By MS/MS	7.9	18.8	7.9	19.8	18.8	19.8
P31153	P31153	5	5	5	S-adenosylmethionine synthase isoform type-2	MAT2A	sp|P31153|METK2_HUMAN S-adenosylmethionine synthase isoform type-2 OS=Homo sapiens OX=9606 GN=MAT2A PE=1 SV=1	1	5	5	5	5	5	5	5	5	5	5	5	5	5	5	5	5	5	5	5	5	5	16.7	16.7	16.7	43.66	395	395	0	29.445	By MS/MS	By MS/MS	By MS/MS	By MS/MS	By MS/MS	By MS/MS	16.7	16.7	16.7	16.7	16.7	16.7
P31323	P31323	5	3	3	cAMP-dependent protein kinase type II-beta regulatory subunit	PRKAR2B	sp|P31323|KAP3_HUMAN cAMP-dependent protein kinase type II-beta regulatory subunit OS=Homo sapiens OX=9606 GN=PRKAR2B PE=1 SV=3	1	5	3	3	5	4	4	4	4	3	3	2	2	2	2	1	3	2	2	2	2	1	13.6	7.2	7.2	46.302	418	418	0	5.4198	By MS/MS	By MS/MS	By MS/MS	By MS/MS	By matching	By matching	13.6	11	11	11	11	9.1
P31431	P31431	3	3	3	Syndecan-4	SDC4	sp|P31431|SDC4_HUMAN Syndecan-4 OS=Homo sapiens OX=9606 GN=SDC4 PE=1 SV=2	1	3	3	3	2	2	3	3	3	3	2	2	3	3	3	3	2	2	3	3	3	3	18.2	18.2	18.2	21.641	198	198	0	19.396	By MS/MS	By MS/MS	By MS/MS	By MS/MS	By MS/MS	By MS/MS	12.1	12.1	18.2	18.2	18.2	18.2
P31639	P31639	7	7	7	Sodium/glucose cotransporter 2	SLC5A2	sp|P31639|SC5A2_HUMAN Sodium/glucose cotransporter 2 OS=Homo sapiens OX=9606 GN=SLC5A2 PE=1 SV=1	1	7	7	7	7	7	7	7	7	7	7	7	7	7	7	7	7	7	7	7	7	7	12.1	12.1	12.1	72.896	672	672	0	318.89	By MS/MS	By MS/MS	By MS/MS	By MS/MS	By MS/MS	By MS/MS	12.1	12.1	12.1	12.1	12.1	12.1
P31689	P31689	13	13	13	DnaJ homolog subfamily A member 1	DNAJA1	sp|P31689|DNJA1_HUMAN DnaJ homolog subfamily A member 1 OS=Homo sapiens OX=9606 GN=DNAJA1 PE=1 SV=2	1	13	13	13	10	9	12	9	9	12	10	9	12	9	9	12	10	9	12	9	9	12	30.2	30.2	30.2	44.868	397	397	0	203.61	By MS/MS	By MS/MS	By MS/MS	By MS/MS	By MS/MS	By MS/MS	23.7	23.7	28.2	23.7	23.7	27.5
P31749	P31749	2	2	2	RAC-alpha serine/threonine-protein kinase	AKT1	sp|P31749|AKT1_HUMAN RAC-alpha serine/threonine-protein kinase OS=Homo sapiens OX=9606 GN=AKT1 PE=1 SV=2	1	2	2	2	2	2	2	1	1	1	2	2	2	1	1	1	2	2	2	1	1	1	3.5	3.5	3.5	55.686	480	480	0.0049558	1.8474	By MS/MS	By MS/MS	By MS/MS	By MS/MS	By MS/MS	By MS/MS	3.5	3.5	3.5	1.7	1.7	1.7
P31751	P31751	6	6	6	RAC-beta serine/threonine-protein kinase	AKT2	sp|P31751|AKT2_HUMAN RAC-beta serine/threonine-protein kinase OS=Homo sapiens OX=9606 GN=AKT2 PE=1 SV=2	1	6	6	6	6	6	5	4	6	6	6	6	5	4	6	6	6	6	5	4	6	6	15.2	15.2	15.2	55.768	481	481	0	17.089	By MS/MS	By MS/MS	By MS/MS	By MS/MS	By MS/MS	By MS/MS	15.2	15.2	13.1	10.8	15.2	15.2
P31939	P31939	12	12	12	Bifunctional purine biosynthesis protein PURH;Phosphoribosylaminoimidazolecarboxamide formyltransferase;IMP cyclohydrolase	ATIC	sp|P31939|PUR9_HUMAN Bifunctional purine biosynthesis protein ATIC OS=Homo sapiens OX=9606 GN=ATIC PE=1 SV=3	1	12	12	12	11	10	8	8	11	10	11	10	8	8	11	10	11	10	8	8	11	10	26	26	26	64.615	592	592	0	68.864	By MS/MS	By MS/MS	By MS/MS	By MS/MS	By MS/MS	By MS/MS	23.1	23.3	18.2	18.6	24.2	21.3
P31942	P31942	2	2	2	Heterogeneous nuclear ribonucleoprotein H3	HNRNPH3	sp|P31942|HNRH3_HUMAN Heterogeneous nuclear ribonucleoprotein H3 OS=Homo sapiens OX=9606 GN=HNRNPH3 PE=1 SV=2	1	2	2	2	2	2	2	1	1	2	2	2	2	1	1	2	2	2	2	1	1	2	6.1	6.1	6.1	36.926	346	346	0.00079713	3.1287	By MS/MS	By MS/MS	By MS/MS	By matching	By MS/MS	By MS/MS	6.1	6.1	6.1	3.5	3.5	6.1
P55795;P31943	P55795;P31943	1;1	1;1	1;1	Heterogeneous nuclear ribonucleoprotein H2;Heterogeneous nuclear ribonucleoprotein H;Heterogeneous nuclear ribonucleoprotein H, N-terminally processed	HNRNPH2;HNRNPH1	sp|P55795|HNRH2_HUMAN Heterogeneous nuclear ribonucleoprotein H2 OS=Homo sapiens OX=9606 GN=HNRNPH2 PE=1 SV=1;sp|P31943|HNRH1_HUMAN Heterogeneous nuclear ribonucleoprotein H OS=Homo sapiens OX=9606 GN=HNRNPH1 PE=1 SV=4	2	1	1	1	0	0	0	1	1	1	0	0	0	1	1	1	0	0	0	1	1	1	3.8	3.8	3.8	49.263	449	449;449	0.0062718	1.7023				By MS/MS	By matching	By matching	0	0	0	3.8	3.8	3.8
P31944	P31944	1	1	1	Caspase-14;Caspase-14 subunit p17, mature form;Caspase-14 subunit p10, mature form;Caspase-14 subunit p20, intermediate form;Caspase-14 subunit p8, intermediate form	CASP14	sp|P31944|CASPE_HUMAN Caspase-14 OS=Homo sapiens OX=9606 GN=CASP14 PE=1 SV=2	1	1	1	1	1	1	1	0	1	1	1	1	1	0	1	1	1	1	1	0	1	1	4.5	4.5	4.5	27.679	242	242	0.0011481	2.5991	By MS/MS	By MS/MS	By matching		By MS/MS	By MS/MS	4.5	4.5	4.5	0	4.5	4.5
P31946	P31946	12	10	8	14-3-3 protein beta/alpha;14-3-3 protein beta/alpha, N-terminally processed	YWHAB	sp|P31946|1433B_HUMAN 14-3-3 protein beta/alpha OS=Homo sapiens OX=9606 GN=YWHAB PE=1 SV=3	1	12	10	8	12	9	11	11	12	12	10	7	9	9	10	10	8	6	7	7	8	8	51.6	43.9	37.4	28.082	246	246	0	304.39	By MS/MS	By MS/MS	By MS/MS	By MS/MS	By MS/MS	By MS/MS	51.6	49.2	49.6	51.6	51.6	51.6
P31947	P31947	14	13	13	14-3-3 protein sigma	SFN	sp|P31947|1433S_HUMAN 14-3-3 protein sigma OS=Homo sapiens OX=9606 GN=SFN PE=1 SV=1	1	14	13	13	12	13	13	14	14	13	11	12	12	13	13	12	11	12	12	13	13	12	46.8	42.7	42.7	27.774	248	248	0	45.562	By MS/MS	By MS/MS	By MS/MS	By MS/MS	By MS/MS	By MS/MS	43.1	43.1	46.8	46.8	46.8	43.1
P31948	P31948	17	17	17	Stress-induced-phosphoprotein 1	STIP1	sp|P31948|STIP1_HUMAN Stress-induced-phosphoprotein 1 OS=Homo sapiens OX=9606 GN=STIP1 PE=1 SV=1	1	17	17	17	16	17	16	14	14	15	16	17	16	14	14	15	16	17	16	14	14	15	32.4	32.4	32.4	62.639	543	543	0	74.46	By MS/MS	By MS/MS	By MS/MS	By MS/MS	By MS/MS	By MS/MS	29.3	32.4	30.9	26	26	27.4
P31949	P31949	6	6	6	Protein S100-A11;Protein S100-A11, N-terminally processed	S100A11	sp|P31949|S10AB_HUMAN Protein S100-A11 OS=Homo sapiens OX=9606 GN=S100A11 PE=1 SV=2	1	6	6	6	6	5	5	5	5	5	6	5	5	5	5	5	6	5	5	5	5	5	41	41	41	11.74	105	105	0	26.689	By MS/MS	By MS/MS	By MS/MS	By MS/MS	By MS/MS	By MS/MS	41	38.1	38.1	38.1	38.1	38.1
P31997	P31997	4	3	3	Carcinoembryonic antigen-related cell adhesion molecule 8	CEACAM8	sp|P31997|CEAM8_HUMAN Carcinoembryonic antigen-related cell adhesion molecule 8 OS=Homo sapiens OX=9606 GN=CEACAM8 PE=1 SV=2	1	4	3	3	4	4	4	2	2	2	3	3	3	1	1	1	3	3	3	1	1	1	14.9	12.3	12.3	38.153	349	349	0	21.322	By MS/MS	By MS/MS	By MS/MS	By matching	By MS/MS	By MS/MS	14.9	14.9	14.9	8.3	6.6	6.6
P32119	P32119	12	11	11	Peroxiredoxin-2	PRDX2	sp|P32119|PRDX2_HUMAN Peroxiredoxin-2 OS=Homo sapiens OX=9606 GN=PRDX2 PE=1 SV=5	1	12	11	11	11	10	10	11	11	12	10	9	9	10	10	11	10	9	9	10	10	11	44.4	38.9	38.9	21.892	198	198	0	88.006	By MS/MS	By MS/MS	By MS/MS	By MS/MS	By MS/MS	By MS/MS	44.4	44.4	44.4	44.4	44.4	44.4
P32189;Q14409	P32189;Q14409	10;9	10;9	8;7	Glycerol kinase;Putative glycerol kinase 3	GK;GK3P	sp|P32189|GLPK_HUMAN Glycerol kinase OS=Homo sapiens OX=9606 GN=GK PE=1 SV=3;sp|Q14409|GLPK3_HUMAN Glycerol kinase 3 OS=Homo sapiens OX=9606 GN=GK3 PE=2 SV=2	2	10	10	8	10	9	7	7	6	6	10	9	7	7	6	6	8	7	5	5	4	4	23.6	23.6	19.7	61.244	559	559;553	0	28.047	By MS/MS	By MS/MS	By MS/MS	By MS/MS	By MS/MS	By MS/MS	23.6	20.4	16.5	16.8	13.1	13.1
P32320	P32320	3	3	3	Cytidine deaminase	CDA	sp|P32320|CDD_HUMAN Cytidine deaminase OS=Homo sapiens OX=9606 GN=CDA PE=1 SV=2	1	3	3	3	3	3	3	2	3	3	3	3	3	2	3	3	3	3	3	2	3	3	30.1	30.1	30.1	16.185	146	146	0	24.411	By MS/MS	By MS/MS	By MS/MS	By MS/MS	By MS/MS	By MS/MS	30.1	30.1	30.1	25.3	30.1	30.1
P32321	P32321	3	3	3	Deoxycytidylate deaminase	DCTD	sp|P32321|DCTD_HUMAN Deoxycytidylate deaminase OS=Homo sapiens OX=9606 GN=DCTD PE=1 SV=2	1	3	3	3	2	2	2	3	3	3	2	2	2	3	3	3	2	2	2	3	3	3	21.9	21.9	21.9	20.016	178	178	0	4.8646	By MS/MS	By MS/MS	By MS/MS	By MS/MS	By MS/MS	By MS/MS	13.5	13.5	13.5	21.9	21.9	21.9
P32455;Q9H0R5	P32455	5;1	5;1	4;1	Interferon-induced guanylate-binding protein 1	GBP1	sp|P32455|GBP1_HUMAN Guanylate-binding protein 1 OS=Homo sapiens OX=9606 GN=GBP1 PE=1 SV=2	2	5	5	4	5	4	4	4	5	4	5	4	4	4	5	4	4	3	4	3	4	4	9.1	9.1	7.1	67.93	592	592;595	0	33.662	By MS/MS	By MS/MS	By MS/MS	By MS/MS	By MS/MS	By MS/MS	9.1	7.8	7.1	7.8	9.1	7.1
P32754	P32754	10	10	10	4-hydroxyphenylpyruvate dioxygenase	HPD	sp|P32754|HPPD_HUMAN 4-hydroxyphenylpyruvate dioxygenase OS=Homo sapiens OX=9606 GN=HPD PE=1 SV=2	1	10	10	10	9	9	9	9	9	10	9	9	9	9	9	10	9	9	9	9	9	10	26.7	26.7	26.7	44.934	393	393	0	24.634	By MS/MS	By MS/MS	By MS/MS	By MS/MS	By MS/MS	By MS/MS	26.5	26.5	26.5	26.5	26.5	26.7
P32856	P32856	11	11	11	Syntaxin-2	STX2	sp|P32856|STX2_HUMAN Syntaxin-2 OS=Homo sapiens OX=9606 GN=STX2 PE=1 SV=3	1	11	11	11	11	10	11	10	10	10	11	10	11	10	10	10	11	10	11	10	10	10	46.9	46.9	46.9	33.341	288	288	0	40.88	By MS/MS	By MS/MS	By MS/MS	By MS/MS	By MS/MS	By MS/MS	46.9	43.8	46.9	41.7	41.3	41.3
P32929	P32929	5	5	5	Cystathionine gamma-lyase	CTH	sp|P32929|CGL_HUMAN Cystathionine gamma-lyase OS=Homo sapiens OX=9606 GN=CTH PE=1 SV=3	1	5	5	5	5	4	5	2	5	5	5	4	5	2	5	5	5	4	5	2	5	5	15.3	15.3	15.3	44.508	405	405	0	8.4333	By MS/MS	By MS/MS	By MS/MS	By MS/MS	By MS/MS	By MS/MS	15.3	12.1	15.3	5.9	15.3	15.3
P32942	P32942	2	2	2	Intercellular adhesion molecule 3	ICAM3	sp|P32942|ICAM3_HUMAN Intercellular adhesion molecule 3 OS=Homo sapiens OX=9606 GN=ICAM3 PE=1 SV=2	1	2	2	2	2	2	1	0	0	0	2	2	1	0	0	0	2	2	1	0	0	0	3.5	3.5	3.5	59.54	547	547	0.0011561	2.6887	By MS/MS	By MS/MS	By MS/MS				3.5	3.5	1.8	0	0	0
Q9ULC5;P33121	Q9ULC5;P33121	1;1	1;1	1;1	Long-chain-fatty-acid--CoA ligase 5;Long-chain-fatty-acid--CoA ligase 1	ACSL5;ACSL1	sp|Q9ULC5|ACSL5_HUMAN Long-chain-fatty-acid--CoA ligase 5 OS=Homo sapiens OX=9606 GN=ACSL5 PE=1 SV=1;sp|P33121|ACSL1_HUMAN Long-chain-fatty-acid--CoA ligase 1 OS=Homo sapiens OX=9606 GN=ACSL1 PE=1 SV=1	2	1	1	1	1	0	1	1	1	1	1	0	1	1	1	1	1	0	1	1	1	1	1.6	1.6	1.6	75.99	683	683;698	0.0029007	2.0552	By MS/MS		By matching	By matching	By matching	By MS/MS	1.6	0	1.6	1.6	1.6	1.6
P33176	P33176	41	41	33	Kinesin-1 heavy chain	KIF5B	sp|P33176|KINH_HUMAN Kinesin-1 heavy chain OS=Homo sapiens OX=9606 GN=KIF5B PE=1 SV=1	1	41	41	33	37	38	37	37	39	38	37	38	37	37	39	38	30	30	30	29	31	30	48.7	48.7	38.5	109.68	963	963	0	323.31	By MS/MS	By MS/MS	By MS/MS	By MS/MS	By MS/MS	By MS/MS	44.2	46.1	44.1	46.3	48	46.1
P33908;O60476	P33908	15;1	15;1	15;1	Mannosyl-oligosaccharide 1,2-alpha-mannosidase IA	MAN1A1	sp|P33908|MA1A1_HUMAN Mannosyl-oligosaccharide 1,2-alpha-mannosidase IA OS=Homo sapiens OX=9606 GN=MAN1A1 PE=1 SV=3	2	15	15	15	7	9	10	12	13	12	7	9	10	12	13	12	7	9	10	12	13	12	18.5	18.5	18.5	72.968	653	653;641	0	25.396	By MS/MS	By MS/MS	By MS/MS	By MS/MS	By MS/MS	By MS/MS	11.3	13.3	13.6	14.7	15.8	15.6
P34059	P34059	3	3	3	N-acetylgalactosamine-6-sulfatase	GALNS	sp|P34059|GALNS_HUMAN N-acetylgalactosamine-6-sulfatase OS=Homo sapiens OX=9606 GN=GALNS PE=1 SV=1	1	3	3	3	2	2	3	1	1	0	2	2	3	1	1	0	2	2	3	1	1	0	7.1	7.1	7.1	58.025	522	522	0	6.0727	By MS/MS	By MS/MS	By MS/MS	By MS/MS	By matching		4.4	4.6	7.1	1.9	1.9	0
P34096	P34096	1	1	1	Ribonuclease 4	RNASE4	sp|P34096|RNAS4_HUMAN Ribonuclease 4 OS=Homo sapiens OX=9606 GN=RNASE4 PE=1 SV=3	1	1	1	1	1	1	1	0	1	0	1	1	1	0	1	0	1	1	1	0	1	0	7.5	7.5	7.5	16.84	147	147	0.0011253	2.3787	By MS/MS	By MS/MS	By matching		By matching		7.5	7.5	7.5	0	7.5	0
P34741	P34741	4	4	4	Syndecan-2	SDC2	sp|P34741|SDC2_HUMAN Syndecan-2 OS=Homo sapiens OX=9606 GN=SDC2 PE=1 SV=2	1	4	4	4	3	3	3	4	4	4	3	3	3	4	4	4	3	3	3	4	4	4	11.4	11.4	11.4	22.16	201	201	0	26.768	By MS/MS	By MS/MS	By matching	By MS/MS	By MS/MS	By MS/MS	11.4	11.4	11.4	11.4	11.4	11.4
P34896;P34897	P34896	16;1	16;1	16;1	Serine hydroxymethyltransferase, cytosolic	SHMT1	sp|P34896|GLYC_HUMAN Serine hydroxymethyltransferase, cytosolic OS=Homo sapiens OX=9606 GN=SHMT1 PE=1 SV=1	2	16	16	16	15	14	16	14	14	14	15	14	16	14	14	14	15	14	16	14	14	14	36.2	36.2	36.2	53.082	483	483;504	0	114.26	By MS/MS	By MS/MS	By MS/MS	By MS/MS	By MS/MS	By MS/MS	33.3	31.1	36.2	33.1	33.1	33.1
P34910	P34910	1	1	1	Protein EVI2B	EVI2B	sp|P34910|EVI2B_HUMAN Protein EVI2B OS=Homo sapiens OX=9606 GN=EVI2B PE=1 SV=2	1	1	1	1	1	0	1	0	0	0	1	0	1	0	0	0	1	0	1	0	0	0	5.4	5.4	5.4	48.666	448	448	0	7.2085	By MS/MS		By matching				5.4	0	5.4	0	0	0
P34913	P34913	11	11	11	Bifunctional epoxide hydrolase 2;Cytosolic epoxide hydrolase 2;Lipid-phosphate phosphatase	EPHX2	sp|P34913|HYES_HUMAN Bifunctional epoxide hydrolase 2 OS=Homo sapiens OX=9606 GN=EPHX2 PE=1 SV=2	1	11	11	11	11	11	11	11	11	11	11	11	11	11	11	11	11	11	11	11	11	11	29.9	29.9	29.9	62.615	555	555	0	126.4	By MS/MS	By MS/MS	By MS/MS	By MS/MS	By MS/MS	By MS/MS	29.9	29.9	29.9	29.9	29.9	29.9
P34932	P34932	21	21	19	Heat shock 70 kDa protein 4	HSPA4	sp|P34932|HSP74_HUMAN Heat shock 70 kDa protein 4 OS=Homo sapiens OX=9606 GN=HSPA4 PE=1 SV=4	1	21	21	19	18	18	18	18	19	19	18	18	18	18	19	19	17	17	17	17	18	17	33.5	33.5	29.9	94.33	840	840	0	211.8	By MS/MS	By MS/MS	By MS/MS	By MS/MS	By MS/MS	By MS/MS	28.2	28.2	28	28.2	30.5	29.9
P34949	P34949	6	6	6	Mannose-6-phosphate isomerase	MPI	sp|P34949|MPI_HUMAN Mannose-6-phosphate isomerase OS=Homo sapiens OX=9606 GN=MPI PE=1 SV=2	1	6	6	6	6	6	6	6	6	6	6	6	6	6	6	6	6	6	6	6	6	6	17.5	17.5	17.5	46.655	423	423	0	32.919	By MS/MS	By MS/MS	By MS/MS	By MS/MS	By MS/MS	By MS/MS	17.5	17.5	17.5	17.5	17.5	17.5
P35052	P35052	1	1	1	Glypican-1;Secreted glypican-1	GPC1	sp|P35052|GPC1_HUMAN Glypican-1 OS=Homo sapiens OX=9606 GN=GPC1 PE=1 SV=2	1	1	1	1	1	0	0	0	0	0	1	0	0	0	0	0	1	0	0	0	0	0	3.2	3.2	3.2	61.68	558	558	0.0052448	1.7456	By MS/MS						3.2	0	0	0	0	0
P35080	P35080	4	4	4	Profilin-2	PFN2	sp|P35080|PROF2_HUMAN Profilin-2 OS=Homo sapiens OX=9606 GN=PFN2 PE=1 SV=3	1	4	4	4	3	4	4	4	4	3	3	4	4	4	4	3	3	4	4	4	4	3	36.4	36.4	36.4	15.046	140	140	0	33.221	By MS/MS	By MS/MS	By MS/MS	By MS/MS	By MS/MS	By MS/MS	29.3	36.4	36.4	36.4	36.4	29.3
P35221;P26232	P35221	10;1	10;1	10;1	Catenin alpha-1	CTNNA1	sp|P35221|CTNA1_HUMAN Catenin alpha-1 OS=Homo sapiens OX=9606 GN=CTNNA1 PE=1 SV=1	2	10	10	10	8	6	6	6	7	7	8	6	6	6	7	7	8	6	6	6	7	7	16.4	16.4	16.4	100.07	906	906;953	0	54.614	By MS/MS	By MS/MS	By MS/MS	By MS/MS	By MS/MS	By MS/MS	12.8	10.2	11.3	11.7	12.9	12.6
P35222	P35222	4	3	3	Catenin beta-1	CTNNB1	sp|P35222|CTNB1_HUMAN Catenin beta-1 OS=Homo sapiens OX=9606 GN=CTNNB1 PE=1 SV=1	1	4	3	3	2	4	3	3	4	4	1	3	2	2	3	3	1	3	2	2	3	3	6	4.4	4.4	85.496	781	781	0	5.8178	By MS/MS	By MS/MS	By MS/MS	By MS/MS	By MS/MS	By MS/MS	3.2	6	4.7	4.5	6	6
P35228	P35228	4	4	4	Nitric oxide synthase, inducible	NOS2	sp|P35228|NOS2_HUMAN Nitric oxide synthase, inducible OS=Homo sapiens OX=9606 GN=NOS2 PE=1 SV=2	1	4	4	4	4	2	3	2	1	0	4	2	3	2	1	0	4	2	3	2	1	0	5.3	5.3	5.3	131.12	1153	1153	0	16.907	By MS/MS	By MS/MS	By MS/MS	By matching	By matching		5.3	2.1	4.2	1.9	1	0
P35237	P35237	13	13	13	Serpin B6	SERPINB6	sp|P35237|SPB6_HUMAN Serpin B6 OS=Homo sapiens OX=9606 GN=SERPINB6 PE=1 SV=3	1	13	13	13	12	12	11	11	13	13	12	12	11	11	13	13	12	12	11	11	13	13	42	42	42	42.621	376	376	0	136.34	By MS/MS	By MS/MS	By MS/MS	By MS/MS	By MS/MS	By MS/MS	40.7	40.7	38	35.4	42	42
P35240;Q14680	P35240	19;1	19;1	19;1	Merlin	NF2	sp|P35240|MERL_HUMAN Merlin OS=Homo sapiens OX=9606 GN=NF2 PE=1 SV=1	2	19	19	19	16	17	16	16	17	18	16	17	16	16	17	18	16	17	16	16	17	18	30.6	30.6	30.6	69.689	595	595;651	0	69.957	By MS/MS	By MS/MS	By MS/MS	By MS/MS	By MS/MS	By MS/MS	28.7	28.7	25.7	27.2	28.7	30.6
P35241;Q69YQ0	P35241	43;1	28;1	28;1	Radixin	RDX	sp|P35241|RADI_HUMAN Radixin OS=Homo sapiens OX=9606 GN=RDX PE=1 SV=1	2	43	28	28	39	39	39	41	40	41	25	25	24	26	26	26	25	25	24	26	26	26	51.8	34.5	34.5	68.563	583	583;1117	0	308.88	By MS/MS	By MS/MS	By MS/MS	By MS/MS	By MS/MS	By MS/MS	49.2	49.1	47.9	51.6	48.5	49.1
P35244	P35244	1	1	1	Replication protein A 14 kDa subunit	RPA3	sp|P35244|RFA3_HUMAN Replication protein A 14 kDa subunit OS=Homo sapiens OX=9606 GN=RPA3 PE=1 SV=1	1	1	1	1	1	1	1	0	0	1	1	1	1	0	0	1	1	1	1	0	0	1	13.2	13.2	13.2	13.569	121	121	0.002197	2.1272	By matching	By matching	By matching			By MS/MS	13.2	13.2	13.2	0	0	13.2
P35268	P35268	2	2	2	60S ribosomal protein L22	RPL22	sp|P35268|RL22_HUMAN 60S ribosomal protein L22 OS=Homo sapiens OX=9606 GN=RPL22 PE=1 SV=2	1	2	2	2	2	2	2	1	2	2	2	2	2	1	2	2	2	2	2	1	2	2	18.8	18.8	18.8	14.787	128	128	0.00084246	3.8332	By MS/MS	By MS/MS	By MS/MS	By MS/MS	By MS/MS	By MS/MS	18.8	18.8	18.8	8.6	18.8	18.8
P35270;REV__Q16649	P35270	9;1	9;1	9;1	Sepiapterin reductase	SPR	sp|P35270|SPRE_HUMAN Sepiapterin reductase OS=Homo sapiens OX=9606 GN=SPR PE=1 SV=1	2	9	9	9	7	7	8	8	8	8	7	7	8	8	8	8	7	7	8	8	8	8	38.7	38.7	38.7	28.048	261	261;462	0	48.405	By MS/MS	By MS/MS	By MS/MS	By MS/MS	By MS/MS	By MS/MS	32.2	32.2	36	36	36	36.4
P35408	P35408	2	2	2	Prostaglandin E2 receptor EP4 subtype	PTGER4	sp|P35408|PE2R4_HUMAN Prostaglandin E2 receptor EP4 subtype OS=Homo sapiens OX=9606 GN=PTGER4 PE=1 SV=1	1	2	2	2	0	1	0	1	2	2	0	1	0	1	2	2	0	1	0	1	2	2	6.4	6.4	6.4	53.119	488	488	0	5.3791		By matching		By matching	By MS/MS	By MS/MS	0	2.3	0	2.3	6.4	6.4
P35542	P35542	3	3	3	Serum amyloid A-4 protein	SAA4	sp|P35542|SAA4_HUMAN Serum amyloid A-4 protein OS=Homo sapiens OX=9606 GN=SAA4 PE=1 SV=2	1	3	3	3	0	0	0	3	3	3	0	0	0	3	3	3	0	0	0	3	3	3	24.6	24.6	24.6	14.746	130	130	0	4.9587				By MS/MS	By MS/MS	By MS/MS	0	0	0	24.6	24.6	24.6
P35558;Q16822	P35558	17;1	17;1	17;1	Phosphoenolpyruvate carboxykinase, cytosolic [GTP]	PCK1	sp|P35558|PCKGC_HUMAN Phosphoenolpyruvate carboxykinase, cytosolic [GTP] OS=Homo sapiens OX=9606 GN=PCK1 PE=1 SV=3	2	17	17	17	16	14	15	14	15	15	16	14	15	14	15	15	16	14	15	14	15	15	33.9	33.9	33.9	69.194	622	622;640	0	74.982	By MS/MS	By MS/MS	By MS/MS	By MS/MS	By MS/MS	By MS/MS	31.4	27.2	29.3	27.3	30.7	30.7
P35579;REV__Q9UKV3	P35579	66;1	66;1	57;1	Myosin-9	MYH9	sp|P35579|MYH9_HUMAN Myosin-9 OS=Homo sapiens OX=9606 GN=MYH9 PE=1 SV=4	2	66	66	57	61	54	53	55	59	57	61	54	53	55	59	57	52	46	44	47	50	48	39	39	33.6	226.53	1960	1960;1341	0	323.31	By MS/MS	By MS/MS	By MS/MS	By MS/MS	By MS/MS	By MS/MS	36.2	33.1	33.2	34	34.9	33.8
P35580	P35580	29	23	22	Myosin-10	MYH10	sp|P35580|MYH10_HUMAN Myosin-10 OS=Homo sapiens OX=9606 GN=MYH10 PE=1 SV=3	1	29	23	22	22	18	24	22	21	23	16	13	18	17	15	17	16	13	17	16	15	17	20.8	16.9	16.3	229	1976	1976	0	84.638	By MS/MS	By MS/MS	By MS/MS	By MS/MS	By MS/MS	By MS/MS	15.8	12.9	16.4	15.4	15.1	16.5
P35606	P35606	6	6	6	Coatomer subunit beta	COPB2	sp|P35606|COPB2_HUMAN Coatomer subunit beta OS=Homo sapiens OX=9606 GN=COPB2 PE=1 SV=2	1	6	6	6	4	5	4	4	5	4	4	5	4	4	5	4	4	5	4	4	5	4	7.4	7.4	7.4	102.49	906	906	0	13.606	By MS/MS	By MS/MS	By MS/MS	By MS/MS	By MS/MS	By matching	4.9	6.4	4.6	4.9	6	4.9
P35611	P35611	4	4	4	Alpha-adducin	ADD1	sp|P35611|ADDA_HUMAN Alpha-adducin OS=Homo sapiens OX=9606 GN=ADD1 PE=1 SV=2	1	4	4	4	3	2	2	2	3	4	3	2	2	2	3	4	3	2	2	2	3	4	7.1	7.1	7.1	80.954	737	737	0	4.5176	By MS/MS	By MS/MS	By MS/MS	By MS/MS	By MS/MS	By MS/MS	5.8	3.3	4.5	4.5	5.7	7.1
P35613	P35613	6	6	6	Basigin	BSG	sp|P35613|BASI_HUMAN Basigin OS=Homo sapiens OX=9606 GN=BSG PE=1 SV=2	1	6	6	6	5	6	6	5	6	6	5	6	6	5	6	6	5	6	6	5	6	6	19	19	19	42.2	385	385	0	52.226	By MS/MS	By MS/MS	By MS/MS	By MS/MS	By MS/MS	By MS/MS	17.1	19	19	17.1	19	19
P35754	P35754	4	4	4	Glutaredoxin-1	GLRX	sp|P35754|GLRX1_HUMAN Glutaredoxin-1 OS=Homo sapiens OX=9606 GN=GLRX PE=1 SV=2	1	4	4	4	4	4	4	3	4	4	4	4	4	3	4	4	4	4	4	3	4	4	44.3	44.3	44.3	11.776	106	106	0	50.614	By MS/MS	By MS/MS	By MS/MS	By MS/MS	By MS/MS	By MS/MS	44.3	44.3	44.3	36.8	44.3	44.3
P35813	P35813	7	7	7	Protein phosphatase 1A	PPM1A	sp|P35813|PPM1A_HUMAN Protein phosphatase 1A OS=Homo sapiens OX=9606 GN=PPM1A PE=1 SV=1	1	7	7	7	6	7	6	6	6	6	6	7	6	6	6	6	6	7	6	6	6	6	23.3	23.3	23.3	42.447	382	382	0	15.568	By MS/MS	By MS/MS	By MS/MS	By MS/MS	By MS/MS	By MS/MS	18.3	23.3	20.4	20.4	20.4	20.2
P35998	P35998	10	10	10	26S protease regulatory subunit 7	PSMC2	sp|P35998|PRS7_HUMAN 26S proteasome regulatory subunit 7 OS=Homo sapiens OX=9606 GN=PSMC2 PE=1 SV=3	1	10	10	10	8	9	8	7	7	6	8	9	8	7	7	6	8	9	8	7	7	6	31.2	31.2	31.2	48.633	433	433	0	59.992	By MS/MS	By MS/MS	By MS/MS	By MS/MS	By MS/MS	By MS/MS	26.3	28.6	26.1	23.8	23.8	19.6
P36405	P36405	9	9	9	ADP-ribosylation factor-like protein 3	ARL3	sp|P36405|ARL3_HUMAN ADP-ribosylation factor-like protein 3 OS=Homo sapiens OX=9606 GN=ARL3 PE=1 SV=2	1	9	9	9	8	9	8	7	9	9	8	9	8	7	9	9	8	9	8	7	9	9	63.7	63.7	63.7	20.455	182	182	0	70.545	By MS/MS	By MS/MS	By MS/MS	By MS/MS	By MS/MS	By MS/MS	50.5	63.7	59.3	58.2	63.7	63.7
P36406	P36406	1	1	1	E3 ubiquitin-protein ligase TRIM23	TRIM23	sp|P36406|TRI23_HUMAN E3 ubiquitin-protein ligase TRIM23 OS=Homo sapiens OX=9606 GN=TRIM23 PE=1 SV=1	1	1	1	1	1	1	1	1	1	1	1	1	1	1	1	1	1	1	1	1	1	1	1.7	1.7	1.7	64.066	574	574	0.0011876	3.0459	By MS/MS	By MS/MS	By MS/MS	By MS/MS	By MS/MS	By MS/MS	1.7	1.7	1.7	1.7	1.7	1.7
P36507	P36507	4	4	3	Dual specificity mitogen-activated protein kinase kinase 2	MAP2K2	sp|P36507|MP2K2_HUMAN Dual specificity mitogen-activated protein kinase kinase 2 OS=Homo sapiens OX=9606 GN=MAP2K2 PE=1 SV=1	1	4	4	3	3	4	4	2	2	2	3	4	4	2	2	2	2	3	3	1	1	1	10.2	10.2	8	44.424	400	400	0	43.64	By MS/MS	By MS/MS	By MS/MS	By MS/MS	By MS/MS	By MS/MS	8	10.2	10.2	5.2	5.2	5.2
P36543;Q96A05	P36543	11;5	11;5	11;5	V-type proton ATPase subunit E 1	ATP6V1E1	sp|P36543|VATE1_HUMAN V-type proton ATPase subunit E 1 OS=Homo sapiens OX=9606 GN=ATP6V1E1 PE=1 SV=1	2	11	11	11	11	11	11	11	11	11	11	11	11	11	11	11	11	11	11	11	11	11	52.7	52.7	52.7	26.145	226	226;226	0	134.22	By MS/MS	By MS/MS	By MS/MS	By MS/MS	By MS/MS	By MS/MS	52.7	52.7	52.7	52.7	52.7	52.7
P36578	P36578	2	2	2	60S ribosomal protein L4	RPL4	sp|P36578|RL4_HUMAN 60S ribosomal protein L4 OS=Homo sapiens OX=9606 GN=RPL4 PE=1 SV=5	1	2	2	2	1	2	1	1	2	1	1	2	1	1	2	1	1	2	1	1	2	1	4.7	4.7	4.7	47.697	427	427	0.0011891	3.0595	By MS/MS	By MS/MS	By MS/MS	By MS/MS	By MS/MS	By MS/MS	2.6	4.7	2.6	2.6	4.7	2.6
P36871	P36871	17	17	17	Phosphoglucomutase-1	PGM1	sp|P36871|PGM1_HUMAN Phosphoglucomutase-1 OS=Homo sapiens OX=9606 GN=PGM1 PE=1 SV=3	1	17	17	17	17	16	17	15	13	16	17	16	17	15	13	16	17	16	17	15	13	16	35.8	35.8	35.8	61.448	562	562	0	53.477	By MS/MS	By MS/MS	By MS/MS	By MS/MS	By MS/MS	By MS/MS	35.8	33.5	35.8	31.5	27.4	34.3
P36894	P36894	2	2	2	Bone morphogenetic protein receptor type-1A	BMPR1A	sp|P36894|BMR1A_HUMAN Bone morphogenetic protein receptor type-1A OS=Homo sapiens OX=9606 GN=BMPR1A PE=1 SV=2	1	2	2	2	0	1	0	1	1	0	0	1	0	1	1	0	0	1	0	1	1	0	5.8	5.8	5.8	60.197	532	532	0	5.1164		By MS/MS		By MS/MS	By MS/MS		0	2.8	0	3	2.8	0
P36915	P36915	2	2	2	Guanine nucleotide-binding protein-like 1	GNL1	sp|P36915|GNL1_HUMAN Guanine nucleotide-binding protein-like 1 OS=Homo sapiens OX=9606 GN=GNL1 PE=1 SV=2	1	2	2	2	1	1	1	2	1	2	1	1	1	2	1	2	1	1	1	2	1	2	4	4	4	68.66	607	607	0.0011355	2.484	By MS/MS	By matching	By matching	By MS/MS	By matching	By matching	1.3	1.3	1.3	4	1.3	4
P36952	P36952	9	9	9	Serpin B5	SERPINB5	sp|P36952|SPB5_HUMAN Serpin B5 OS=Homo sapiens OX=9606 GN=SERPINB5 PE=1 SV=2	1	9	9	9	8	8	7	7	7	7	8	8	7	7	7	7	8	8	7	7	7	7	31.7	31.7	31.7	42.1	375	375	0	24.362	By MS/MS	By MS/MS	By MS/MS	By MS/MS	By MS/MS	By MS/MS	29.6	29.3	24.8	23.7	23.7	24.8
P36955;CON__Q95121	P36955	11;2	11;2	11;2	Pigment epithelium-derived factor	SERPINF1	sp|P36955|PEDF_HUMAN Pigment epithelium-derived factor OS=Homo sapiens OX=9606 GN=SERPINF1 PE=1 SV=4	2	11	11	11	7	6	5	10	11	10	7	6	5	10	11	10	7	6	5	10	11	10	26.6	26.6	26.6	46.312	418	418;416	0	26.832	By MS/MS	By MS/MS	By MS/MS	By MS/MS	By MS/MS	By MS/MS	15.6	15.8	11.7	24.4	26.6	24.9
P36959	P36959	3	3	3	GMP reductase 1	GMPR	sp|P36959|GMPR1_HUMAN GMP reductase 1 OS=Homo sapiens OX=9606 GN=GMPR PE=1 SV=1	1	3	3	3	1	2	2	2	3	2	1	2	2	2	3	2	1	2	2	2	3	2	15.9	15.9	15.9	37.418	345	345	0	12.295	By MS/MS	By MS/MS	By MS/MS	By MS/MS	By MS/MS	By MS/MS	7.5	11	11	11	15.9	11
P36969	P36969	9	9	9	Phospholipid hydroperoxide glutathione peroxidase, mitochondrial	GPX4	sp|P36969|GPX4_HUMAN Phospholipid hydroperoxide glutathione peroxidase OS=Homo sapiens OX=9606 GN=GPX4 PE=1 SV=3	1	9	9	9	9	9	8	9	9	9	9	9	8	9	9	9	9	9	8	9	9	9	48.7	48.7	48.7	22.174	197	197	0	24.836	By MS/MS	By MS/MS	By MS/MS	By MS/MS	By MS/MS	By MS/MS	48.7	48.7	44.2	48.7	48.7	48.7
P37235;P84074	P37235;P84074	7;4	7;4	5;2	Hippocalcin-like protein 1;Neuron-specific calcium-binding protein hippocalcin	HPCAL1;HPCA	sp|P37235|HPCL1_HUMAN Hippocalcin-like protein 1 OS=Homo sapiens OX=9606 GN=HPCAL1 PE=1 SV=3;sp|P84074|HPCA_HUMAN Neuron-specific calcium-binding protein hippocalcin OS=Homo sapiens OX=9606 GN=HPCA PE=1 SV=2	2	7	7	5	7	5	6	6	6	6	7	5	6	6	6	6	5	3	4	4	4	4	33.7	33.7	25.9	22.313	193	193;193	0	26.436	By MS/MS	By MS/MS	By MS/MS	By MS/MS	By MS/MS	By MS/MS	33.7	21.2	25.9	29	25.9	29
P37802;Q9UI15	P37802	8;1	8;1	8;1	Transgelin-2	TAGLN2	sp|P37802|TAGL2_HUMAN Transgelin-2 OS=Homo sapiens OX=9606 GN=TAGLN2 PE=1 SV=3	2	8	8	8	6	5	5	6	7	6	6	5	5	6	7	6	6	5	5	6	7	6	43.2	43.2	43.2	22.391	199	199;199	0	117.91	By MS/MS	By MS/MS	By MS/MS	By MS/MS	By MS/MS	By MS/MS	33.2	27.6	27.6	33.7	37.7	32.2
P37837	P37837	7	7	7	Transaldolase	TALDO1	sp|P37837|TALDO_HUMAN Transaldolase OS=Homo sapiens OX=9606 GN=TALDO1 PE=1 SV=2	1	7	7	7	7	7	7	6	7	7	7	7	7	6	7	7	7	7	7	6	7	7	22	22	22	37.54	337	337	0	16.116	By MS/MS	By MS/MS	By MS/MS	By MS/MS	By MS/MS	By MS/MS	22	22	22	19	22	22
P37840	P37840	1	1	1	Alpha-synuclein	SNCA	sp|P37840|SYUA_HUMAN Alpha-synuclein OS=Homo sapiens OX=9606 GN=SNCA PE=1 SV=1	1	1	1	1	0	0	1	1	1	1	0	0	1	1	1	1	0	0	1	1	1	1	11.4	11.4	11.4	14.46	140	140	0.0032247	1.9776			By matching	By MS/MS	By MS/MS	By MS/MS	0	0	11.4	11.4	11.4	11.4
P38571	P38571	1	1	1	Lysosomal acid lipase/cholesteryl ester hydrolase	LIPA	sp|P38571|LICH_HUMAN Lysosomal acid lipase/cholesteryl ester hydrolase OS=Homo sapiens OX=9606 GN=LIPA PE=1 SV=2	1	1	1	1	1	1	1	1	1	1	1	1	1	1	1	1	1	1	1	1	1	1	2.5	2.5	2.5	45.418	399	399	0.0011244	2.3605	By MS/MS	By matching	By MS/MS	By MS/MS	By MS/MS	By MS/MS	2.5	2.5	2.5	2.5	2.5	2.5
P38606	P38606	17	17	17	V-type proton ATPase catalytic subunit A	ATP6V1A	sp|P38606|VATA_HUMAN V-type proton ATPase catalytic subunit A OS=Homo sapiens OX=9606 GN=ATP6V1A PE=1 SV=2	1	17	17	17	14	15	13	15	14	15	14	15	13	15	14	15	14	15	13	15	14	15	31.6	31.6	31.6	68.303	617	617	0	100.2	By MS/MS	By MS/MS	By MS/MS	By MS/MS	By MS/MS	By MS/MS	25.6	28	25.6	27.9	26.7	28.5
P39019	P39019	2	2	2	40S ribosomal protein S19	RPS19	sp|P39019|RS19_HUMAN 40S ribosomal protein S19 OS=Homo sapiens OX=9606 GN=RPS19 PE=1 SV=2	1	2	2	2	1	2	1	1	1	0	1	2	1	1	1	0	1	2	1	1	1	0	13.1	13.1	13.1	16.06	145	145	0.0074932	1.4848	By MS/MS	By MS/MS	By MS/MS	By MS/MS	By MS/MS		6.2	13.1	6.2	6.2	6.2	0
P39023	P39023	2	2	2	60S ribosomal protein L3	RPL3	sp|P39023|RL3_HUMAN 60S ribosomal protein L3 OS=Homo sapiens OX=9606 GN=RPL3 PE=1 SV=2	1	2	2	2	1	2	1	2	1	1	1	2	1	2	1	1	1	2	1	2	1	1	9.4	9.4	9.4	46.108	403	403	0	4.3435	By MS/MS	By MS/MS	By matching	By MS/MS	By matching	By matching	3	9.4	3	9.4	3	3
P39059	P39059	2	2	2	Collagen alpha-1(XV) chain;Restin;Restin-2;Restin-3;Restin-4	COL15A1	sp|P39059|COFA1_HUMAN Collagen alpha-1(XV) chain OS=Homo sapiens OX=9606 GN=COL15A1 PE=1 SV=2	1	2	2	2	1	1	1	2	2	2	1	1	1	2	2	2	1	1	1	2	2	2	2.9	2.9	2.9	141.72	1388	1388	0.00086133	4.1703	By MS/MS	By MS/MS	By MS/MS	By MS/MS	By MS/MS	By MS/MS	1.1	1.1	1.1	2.9	2.9	2.9
P39060	P39060	8	8	8	Collagen alpha-1(XVIII) chain;Endostatin	COL18A1	sp|P39060|COIA1_HUMAN Collagen alpha-1(XVIII) chain OS=Homo sapiens OX=9606 GN=COL18A1 PE=1 SV=5	1	8	8	8	3	3	3	7	6	6	3	3	3	7	6	6	3	3	3	7	6	6	5.4	5.4	5.4	178.19	1754	1754	0	32.455	By MS/MS	By MS/MS	By MS/MS	By MS/MS	By MS/MS	By MS/MS	2.2	2.2	2.2	4.7	4.4	4.4
P40121	P40121	12	12	12	Macrophage-capping protein	CAPG	sp|P40121|CAPG_HUMAN Macrophage-capping protein OS=Homo sapiens OX=9606 GN=CAPG PE=1 SV=2	1	12	12	12	11	11	11	10	12	11	11	11	11	10	12	11	11	11	11	10	12	11	41.4	41.4	41.4	38.498	348	348	0	152.19	By MS/MS	By MS/MS	By MS/MS	By MS/MS	By MS/MS	By MS/MS	36.8	36.8	36.8	33.9	41.4	36.8
P40189	P40189	3	3	3	Interleukin-6 receptor subunit beta	IL6ST	sp|P40189|IL6RB_HUMAN Interleukin-6 receptor subunit beta OS=Homo sapiens OX=9606 GN=IL6ST PE=1 SV=2	1	3	3	3	3	3	2	2	2	1	3	3	2	2	2	1	3	3	2	2	2	1	6.6	6.6	6.6	103.54	918	918	0	23.278	By MS/MS	By matching	By MS/MS	By matching	By MS/MS	By matching	6.6	6.6	5.3	3.2	4.8	3.5
P40199	P40199	2	2	2	Carcinoembryonic antigen-related cell adhesion molecule 6	CEACAM6	sp|P40199|CEAM6_HUMAN Carcinoembryonic antigen-related cell adhesion molecule 6 OS=Homo sapiens OX=9606 GN=CEACAM6 PE=1 SV=4	1	2	2	2	2	2	2	2	2	1	2	2	2	2	2	1	2	2	2	2	2	1	9.9	9.9	9.9	37.237	344	344	0	22.109	By MS/MS	By MS/MS	By MS/MS	By MS/MS	By MS/MS	By MS/MS	9.9	9.9	9.9	9.9	9.9	6.1
P40227;Q92526	P40227	10;4	10;4	10;4	T-complex protein 1 subunit zeta	CCT6A	sp|P40227|TCPZ_HUMAN T-complex protein 1 subunit zeta OS=Homo sapiens OX=9606 GN=CCT6A PE=1 SV=3	2	10	10	10	10	10	9	9	10	9	10	10	9	9	10	9	10	10	9	9	10	9	20.5	20.5	20.5	58.024	531	531;530	0	73.633	By MS/MS	By MS/MS	By MS/MS	By MS/MS	By MS/MS	By MS/MS	20.5	20.5	19.2	18.8	20.5	18.6
P40763	P40763	11	11	11	Signal transducer and activator of transcription 3	STAT3	sp|P40763|STAT3_HUMAN Signal transducer and activator of transcription 3 OS=Homo sapiens OX=9606 GN=STAT3 PE=1 SV=2	1	11	11	11	8	8	9	9	9	9	8	8	9	9	9	9	8	8	9	9	9	9	17.7	17.7	17.7	88.067	770	770	0	49.718	By MS/MS	By MS/MS	By MS/MS	By MS/MS	By MS/MS	By MS/MS	13.8	12.3	15.2	15.2	14.8	14.8
P40818	P40818	13	13	13	Ubiquitin carboxyl-terminal hydrolase 8	USP8	sp|P40818|UBP8_HUMAN Ubiquitin carboxyl-terminal hydrolase 8 OS=Homo sapiens OX=9606 GN=USP8 PE=1 SV=1	1	13	13	13	11	8	11	11	11	9	11	8	11	11	11	9	11	8	11	11	11	9	13.1	13.1	13.1	127.52	1118	1118	0	28.264	By MS/MS	By MS/MS	By MS/MS	By MS/MS	By MS/MS	By MS/MS	11.5	9	11.4	11.4	11.4	9.1
P40925	P40925	14	14	14	Malate dehydrogenase, cytoplasmic	MDH1	sp|P40925|MDHC_HUMAN Malate dehydrogenase, cytoplasmic OS=Homo sapiens OX=9606 GN=MDH1 PE=1 SV=4	1	14	14	14	14	13	13	13	12	12	14	13	13	13	12	12	14	13	13	13	12	12	38.9	38.9	38.9	36.426	334	334	0	58.745	By MS/MS	By MS/MS	By MS/MS	By MS/MS	By MS/MS	By MS/MS	38.9	38.6	38.6	38.6	34.7	34.7
P41091;Q2VIR3	P41091;Q2VIR3	7;5	7;5	7;5	Eukaryotic translation initiation factor 2 subunit 3;Putative eukaryotic translation initiation factor 2 subunit 3-like protein	EIF2S3;EIF2S3L	sp|P41091|IF2G_HUMAN Eukaryotic translation initiation factor 2 subunit 3 OS=Homo sapiens OX=9606 GN=EIF2S3 PE=1 SV=3;sp|Q2VIR3|IF2GL_HUMAN Eukaryotic translation initiation factor 2 subunit 3B OS=Homo sapiens OX=9606 GN=EIF2S3B PE=2 SV=2	2	7	7	7	6	5	6	7	6	7	6	5	6	7	6	7	6	5	6	7	6	7	20.1	20.1	20.1	51.109	472	472;472	0	25.167	By MS/MS	By MS/MS	By MS/MS	By MS/MS	By MS/MS	By MS/MS	18.4	16.1	18.4	20.1	18.4	20.1
P41181	P41181	4	4	4	Aquaporin-2	AQP2	sp|P41181|AQP2_HUMAN Aquaporin-2 OS=Homo sapiens OX=9606 GN=AQP2 PE=1 SV=1	1	4	4	4	4	4	4	4	4	4	4	4	4	4	4	4	4	4	4	4	4	4	13.7	13.7	13.7	28.837	271	271	0	45.772	By MS/MS	By MS/MS	By MS/MS	By MS/MS	By MS/MS	By MS/MS	13.7	13.7	13.7	13.7	13.7	13.7
P41217	P41217	2	2	2	OX-2 membrane glycoprotein	CD200	sp|P41217|OX2G_HUMAN OX-2 membrane glycoprotein OS=Homo sapiens OX=9606 GN=CD200 PE=1 SV=4	1	2	2	2	2	2	2	2	2	2	2	2	2	2	2	2	2	2	2	2	2	2	11.5	11.5	11.5	31.264	278	278	0	30.222	By MS/MS	By MS/MS	By MS/MS	By MS/MS	By MS/MS	By MS/MS	11.5	11.5	11.5	11.5	11.5	11.5
P41218	P41218	4	4	4	Myeloid cell nuclear differentiation antigen	MNDA	sp|P41218|MNDA_HUMAN Myeloid cell nuclear differentiation antigen OS=Homo sapiens OX=9606 GN=MNDA PE=1 SV=1	1	4	4	4	3	4	3	1	0	0	3	4	3	1	0	0	3	4	3	1	0	0	9.1	9.1	9.1	45.836	407	407	0	7.2412	By MS/MS	By MS/MS	By MS/MS	By matching			7.4	9.1	7.4	2.9	0	0
P41222	P41222	4	4	4	Prostaglandin-H2 D-isomerase	PTGDS	sp|P41222|PTGDS_HUMAN Prostaglandin-H2 D-isomerase OS=Homo sapiens OX=9606 GN=PTGDS PE=1 SV=1	1	4	4	4	4	4	4	4	4	4	4	4	4	4	4	4	4	4	4	4	4	4	20	20	20	21.029	190	190	0	9.7372	By MS/MS	By MS/MS	By MS/MS	By MS/MS	By MS/MS	By MS/MS	20	20	20	20	20	20
P41240	P41240	8	8	8	Tyrosine-protein kinase CSK	CSK	sp|P41240|CSK_HUMAN Tyrosine-protein kinase CSK OS=Homo sapiens OX=9606 GN=CSK PE=1 SV=1	1	8	8	8	6	6	6	6	7	4	6	6	6	6	7	4	6	6	6	6	7	4	20.2	20.2	20.2	50.704	450	450	0	9.0047	By MS/MS	By MS/MS	By MS/MS	By MS/MS	By MS/MS	By MS/MS	13.6	13.6	13.6	13.6	16.7	8.2
P41250	P41250	4	4	4	Glycine--tRNA ligase	GARS	sp|P41250|GARS_HUMAN Glycine--tRNA ligase OS=Homo sapiens OX=9606 GN=GARS1 PE=1 SV=3	1	4	4	4	2	2	2	3	3	2	2	2	2	3	3	2	2	2	2	3	3	2	5.8	5.8	5.8	83.165	739	739	0	7.1858	By MS/MS	By MS/MS	By MS/MS	By MS/MS	By MS/MS	By MS/MS	3	3	3	4.5	4.5	2.8
P41252	P41252	2	2	2	Isoleucine--tRNA ligase, cytoplasmic	IARS	sp|P41252|SYIC_HUMAN Isoleucine--tRNA ligase, cytoplasmic OS=Homo sapiens OX=9606 GN=IARS1 PE=1 SV=2	1	2	2	2	1	2	2	1	1	1	1	2	2	1	1	1	1	2	2	1	1	1	1.7	1.7	1.7	144.5	1262	1262	0.00080775	3.3237	By MS/MS	By MS/MS	By MS/MS	By MS/MS	By MS/MS	By MS/MS	0.8	1.7	1.7	0.8	0.8	0.8
P41567;O60739	P41567;O60739	4;3	4;3	4;3	Eukaryotic translation initiation factor 1;Eukaryotic translation initiation factor 1b	EIF1;EIF1B	sp|P41567|EIF1_HUMAN Eukaryotic translation initiation factor 1 OS=Homo sapiens OX=9606 GN=EIF1 PE=1 SV=1;sp|O60739|EIF1B_HUMAN Eukaryotic translation initiation factor 1b OS=Homo sapiens OX=9606 GN=EIF1B PE=1 SV=2	2	4	4	4	3	3	3	4	4	4	3	3	3	4	4	4	3	3	3	4	4	4	42.5	42.5	42.5	12.732	113	113;113	0	23.612	By MS/MS	By MS/MS	By MS/MS	By MS/MS	By MS/MS	By MS/MS	27.4	27.4	27.4	42.5	42.5	42.5
P41732	P41732	2	2	2	Tetraspanin-7	TSPAN7	sp|P41732|TSN7_HUMAN Tetraspanin-7 OS=Homo sapiens OX=9606 GN=TSPAN7 PE=1 SV=2	1	2	2	2	2	2	2	2	2	2	2	2	2	2	2	2	2	2	2	2	2	2	8.8	8.8	8.8	27.574	249	249	0	26.473	By MS/MS	By MS/MS	By MS/MS	By MS/MS	By MS/MS	By MS/MS	8.8	8.8	8.8	8.8	8.8	8.8
P41743	P41743	7	6	6	Protein kinase C iota type	PRKCI	sp|P41743|KPCI_HUMAN Protein kinase C iota type OS=Homo sapiens OX=9606 GN=PRKCI PE=1 SV=2	1	7	6	6	6	6	6	7	6	7	5	5	5	6	5	6	5	5	5	6	5	6	18.1	16.8	16.8	68.262	596	596	0	77.075	By MS/MS	By MS/MS	By MS/MS	By MS/MS	By MS/MS	By MS/MS	14.4	14.4	13.9	18.1	13.9	18.1
P42025	P42025	3	2	2	Beta-centractin	ACTR1B	sp|P42025|ACTY_HUMAN Beta-centractin OS=Homo sapiens OX=9606 GN=ACTR1B PE=1 SV=1	1	3	2	2	2	3	2	2	2	2	1	2	1	1	1	1	1	2	1	1	1	1	10.4	8.5	8.5	42.293	376	376	0.00083647	3.7354	By matching	By MS/MS	By MS/MS	By matching	By MS/MS	By matching	6.4	10.4	6.4	6.4	6.4	6.4
P42224	P42224	16	16	16	Signal transducer and activator of transcription 1-alpha/beta	STAT1	sp|P42224|STAT1_HUMAN Signal transducer and activator of transcription 1-alpha/beta OS=Homo sapiens OX=9606 GN=STAT1 PE=1 SV=2	1	16	16	16	14	14	16	15	12	15	14	14	16	15	12	15	14	14	16	15	12	15	23.5	23.5	23.5	87.334	750	750	0	58.54	By MS/MS	By MS/MS	By MS/MS	By MS/MS	By MS/MS	By MS/MS	20	20	23.5	21.7	16.4	21.2
P42330	P42330	9	9	4	Aldo-keto reductase family 1 member C3	AKR1C3	sp|P42330|AK1C3_HUMAN Aldo-keto reductase family 1 member C3 OS=Homo sapiens OX=9606 GN=AKR1C3 PE=1 SV=4	1	9	9	4	9	9	8	8	7	7	9	9	8	8	7	7	4	4	3	3	2	2	33.1	33.1	15.8	36.853	323	323	0	110.82	By MS/MS	By MS/MS	By MS/MS	By MS/MS	By MS/MS	By MS/MS	33.1	33.1	28.8	28.8	23.8	23.8
P42345	P42345	22	22	22	Serine/threonine-protein kinase mTOR	MTOR	sp|P42345|MTOR_HUMAN Serine/threonine-protein kinase mTOR OS=Homo sapiens OX=9606 GN=MTOR PE=1 SV=1	1	22	22	22	19	17	17	7	7	5	19	17	17	7	7	5	19	17	17	7	7	5	11.1	11.1	11.1	288.89	2549	2549	0	70.451	By MS/MS	By MS/MS	By MS/MS	By MS/MS	By MS/MS	By MS/MS	10.1	9.1	9.1	3.2	4.1	3
P42356;Q8N8J0;A4QPH2	P42356	18;2;1	18;2;1	18;2;1	Phosphatidylinositol 4-kinase alpha	PI4KA	sp|P42356|PI4KA_HUMAN Phosphatidylinositol 4-kinase alpha OS=Homo sapiens OX=9606 GN=PI4KA PE=1 SV=4	3	18	18	18	13	10	13	15	15	14	13	10	13	15	15	14	13	10	13	15	15	14	10.2	10.2	10.2	236.83	2102	2102;262;592	0	80.094	By MS/MS	By MS/MS	By MS/MS	By MS/MS	By MS/MS	By MS/MS	6.9	5.1	7.3	8.5	8.7	7.8
P42566	P42566	7	7	7	Epidermal growth factor receptor substrate 15	EPS15	sp|P42566|EPS15_HUMAN Epidermal growth factor receptor substrate 15 OS=Homo sapiens OX=9606 GN=EPS15 PE=1 SV=2	1	7	7	7	4	6	5	6	6	5	4	6	5	6	6	5	4	6	5	6	6	5	10.6	10.6	10.6	98.655	896	896	0	18.112	By MS/MS	By MS/MS	By MS/MS	By MS/MS	By MS/MS	By MS/MS	5.9	9	7.5	9.3	9.3	7.9
P42658	P42658	5	5	5	Dipeptidyl aminopeptidase-like protein 6	DPP6	sp|P42658|DPP6_HUMAN Dipeptidyl aminopeptidase-like protein 6 OS=Homo sapiens OX=9606 GN=DPP6 PE=1 SV=2	1	5	5	5	4	5	5	5	5	4	4	5	5	5	5	4	4	5	5	5	5	4	10.1	10.1	10.1	97.587	865	865	0	16.818	By MS/MS	By MS/MS	By MS/MS	By MS/MS	By MS/MS	By MS/MS	6.8	10.1	10.1	10.1	10.1	6.8
P42685	P42685	20	20	19	Tyrosine-protein kinase FRK	FRK	sp|P42685|FRK_HUMAN Tyrosine-protein kinase FRK OS=Homo sapiens OX=9606 GN=FRK PE=1 SV=1	1	20	20	19	19	18	19	19	17	18	19	18	19	19	17	18	18	17	18	18	16	17	41.4	41.4	39.8	58.253	505	505	0	323.31	By MS/MS	By MS/MS	By MS/MS	By MS/MS	By MS/MS	By MS/MS	40	36	38.6	41.4	33.3	40
P42702	P42702	1	1	1	Leukemia inhibitory factor receptor	LIFR	sp|P42702|LIFR_HUMAN Leukemia inhibitory factor receptor OS=Homo sapiens OX=9606 GN=LIFR PE=1 SV=1	1	1	1	1	1	1	1	0	1	1	1	1	1	0	1	1	1	1	1	0	1	1	0.6	0.6	0.6	123.74	1097	1097	1	-2	By matching	By matching	By MS/MS		By matching	By matching	0.6	0.6	0.6	0	0.6	0.6
P42766	P42766	1	1	1	60S ribosomal protein L35	RPL35	sp|P42766|RL35_HUMAN 60S ribosomal protein L35 OS=Homo sapiens OX=9606 GN=RPL35 PE=1 SV=2	1	1	1	1	1	1	1	0	0	0	1	1	1	0	0	0	1	1	1	0	0	0	8.1	8.1	8.1	14.551	123	123	0.0046099	1.8752	By MS/MS	By MS/MS	By matching				8.1	8.1	8.1	0	0	0
P42785	P42785	9	9	9	Lysosomal Pro-X carboxypeptidase	PRCP	sp|P42785|PCP_HUMAN Lysosomal Pro-X carboxypeptidase OS=Homo sapiens OX=9606 GN=PRCP PE=1 SV=1	1	9	9	9	9	9	9	5	5	5	9	9	9	5	5	5	9	9	9	5	5	5	15.7	15.7	15.7	55.799	496	496	0	25.494	By MS/MS	By MS/MS	By MS/MS	By MS/MS	By MS/MS	By MS/MS	15.7	15.7	15.7	11.1	9.7	9.7
P43005	P43005	5	5	5	Excitatory amino acid transporter 3	SLC1A1	sp|P43005|EAA3_HUMAN Excitatory amino acid transporter 3 OS=Homo sapiens OX=9606 GN=SLC1A1 PE=1 SV=2	1	5	5	5	4	5	4	4	4	4	4	5	4	4	4	4	4	5	4	4	4	4	8.4	8.4	8.4	57.1	524	524	0	50.516	By MS/MS	By MS/MS	By MS/MS	By MS/MS	By MS/MS	By MS/MS	6.3	8.4	6.3	6.3	6.3	6.3
P43034	P43034	9	9	9	Platelet-activating factor acetylhydrolase IB subunit alpha	PAFAH1B1	sp|P43034|LIS1_HUMAN Platelet-activating factor acetylhydrolase IB subunit beta OS=Homo sapiens OX=9606 GN=PAFAH1B1 PE=1 SV=2	1	9	9	9	9	9	8	9	8	8	9	9	8	9	8	8	9	9	8	9	8	8	23.7	23.7	23.7	46.637	410	410	0	39.061	By MS/MS	By MS/MS	By MS/MS	By MS/MS	By MS/MS	By MS/MS	23.7	23.7	21	23.7	20.7	20.7
P43234	P43234	3	3	3	Cathepsin O	CTSO	sp|P43234|CATO_HUMAN Cathepsin O OS=Homo sapiens OX=9606 GN=CTSO PE=1 SV=1	1	3	3	3	2	3	3	2	2	1	2	3	3	2	2	1	2	3	3	2	2	1	10.3	10.3	10.3	35.957	321	321	0	47.694	By MS/MS	By MS/MS	By MS/MS	By matching	By matching	By matching	7.2	10.3	10.3	5.3	8.1	5
P43250;P32298;P34947	P43250	3;1;1	3;1;1	3;1;1	G protein-coupled receptor kinase 6	GRK6	sp|P43250|GRK6_HUMAN G protein-coupled receptor kinase 6 OS=Homo sapiens OX=9606 GN=GRK6 PE=1 SV=2	3	3	3	3	2	3	2	3	3	3	2	3	2	3	3	3	2	3	2	3	3	3	7.5	7.5	7.5	65.99	576	576;578;590	0	10.516	By MS/MS	By MS/MS	By MS/MS	By MS/MS	By MS/MS	By MS/MS	5	7.5	5.4	7.5	7.5	7.5
P43251	P43251	1	1	1	Biotinidase	BTD	sp|P43251|BTD_HUMAN Biotinidase OS=Homo sapiens OX=9606 GN=BTD PE=1 SV=2	1	1	1	1	0	0	0	1	1	1	0	0	0	1	1	1	0	0	0	1	1	1	1.8	1.8	1.8	61.132	543	543	0.0014864	2.2638				By MS/MS	By MS/MS	By MS/MS	0	0	0	1.8	1.8	1.8
P43353;P48448;P30838;P51648	P43353	11;3;1;1	11;3;1;1	11;3;1;1	Aldehyde dehydrogenase family 3 member B1	ALDH3B1	sp|P43353|AL3B1_HUMAN Aldehyde dehydrogenase family 3 member B1 OS=Homo sapiens OX=9606 GN=ALDH3B1 PE=1 SV=1	4	11	11	11	11	9	10	11	11	11	11	9	10	11	11	11	11	9	10	11	11	11	29.5	29.5	29.5	51.839	468	468;385;453;485	0	198.63	By MS/MS	By MS/MS	By MS/MS	By MS/MS	By MS/MS	By MS/MS	29.5	22.4	27.4	29.5	29.5	29.5
P43405	P43405	12	12	12	Tyrosine-protein kinase SYK	SYK	sp|P43405|KSYK_HUMAN Tyrosine-protein kinase SYK OS=Homo sapiens OX=9606 GN=SYK PE=1 SV=1	1	12	12	12	11	12	12	11	10	11	11	12	12	11	10	11	11	12	12	11	10	11	23.3	23.3	23.3	72.065	635	635	0	35.663	By MS/MS	By MS/MS	By MS/MS	By MS/MS	By MS/MS	By MS/MS	21.7	23.3	23.3	21.7	18.4	21.7
P43487	P43487	4	4	4	Ran-specific GTPase-activating protein	RANBP1	sp|P43487|RANG_HUMAN Ran-specific GTPase-activating protein OS=Homo sapiens OX=9606 GN=RANBP1 PE=1 SV=1	1	4	4	4	4	4	4	4	4	3	4	4	4	4	4	3	4	4	4	4	4	3	32.3	32.3	32.3	23.31	201	201	0	38.534	By MS/MS	By MS/MS	By MS/MS	By MS/MS	By MS/MS	By MS/MS	32.3	32.3	32.3	32.3	32.3	26.9
P43490	P43490	12	12	12	Nicotinamide phosphoribosyltransferase	NAMPT	sp|P43490|NAMPT_HUMAN Nicotinamide phosphoribosyltransferase OS=Homo sapiens OX=9606 GN=NAMPT PE=1 SV=1	1	12	12	12	10	9	10	9	10	10	10	9	10	9	10	10	10	9	10	9	10	10	32.2	32.2	32.2	55.52	491	491	0	36.146	By MS/MS	By MS/MS	By MS/MS	By MS/MS	By MS/MS	By MS/MS	25.5	23.4	27.9	24.4	25.5	26.5
P43686	P43686	3	3	3	26S protease regulatory subunit 6B	PSMC4	sp|P43686|PRS6B_HUMAN 26S proteasome regulatory subunit 6B OS=Homo sapiens OX=9606 GN=PSMC4 PE=1 SV=2	1	3	3	3	2	3	3	3	3	3	2	3	3	3	3	3	2	3	3	3	3	3	7.9	7.9	7.9	47.366	418	418	0.0011512	2.6148	By MS/MS	By MS/MS	By MS/MS	By MS/MS	By MS/MS	By MS/MS	4.5	7.9	7.9	7.9	7.9	7.9
P45381	P45381	4	4	4	Aspartoacylase	ASPA	sp|P45381|ACY2_HUMAN Aspartoacylase OS=Homo sapiens OX=9606 GN=ASPA PE=1 SV=1	1	4	4	4	4	3	4	3	2	2	4	3	4	3	2	2	4	3	4	3	2	2	13.4	13.4	13.4	35.735	313	313	0	8.7392	By MS/MS	By MS/MS	By MS/MS	By MS/MS	By MS/MS	By MS/MS	13.4	10.2	13.4	9.9	6.7	6.7
P45877	P45877	3	3	3	Peptidyl-prolyl cis-trans isomerase C	PPIC	sp|P45877|PPIC_HUMAN Peptidyl-prolyl cis-trans isomerase C OS=Homo sapiens OX=9606 GN=PPIC PE=1 SV=1	1	3	3	3	3	2	1	2	3	2	3	2	1	2	3	2	3	2	1	2	3	2	13.2	13.2	13.2	22.763	212	212	0	6.9825	By MS/MS	By MS/MS	By MS/MS	By MS/MS	By MS/MS	By MS/MS	13.2	9.9	6.1	9.4	13.2	9.9
P45880	P45880	10	10	10	Voltage-dependent anion-selective channel protein 2	VDAC2	sp|P45880|VDAC2_HUMAN Voltage-dependent anion-selective channel protein 2 OS=Homo sapiens OX=9606 GN=VDAC2 PE=1 SV=2	1	10	10	10	10	10	10	10	10	10	10	10	10	10	10	10	10	10	10	10	10	10	38.4	38.4	38.4	31.566	294	294	0	147.12	By MS/MS	By MS/MS	By MS/MS	By MS/MS	By MS/MS	By MS/MS	38.4	38.4	38.4	38.4	38.4	38.4
P45974	P45974	15	15	15	Ubiquitin carboxyl-terminal hydrolase 5	USP5	sp|P45974|UBP5_HUMAN Ubiquitin carboxyl-terminal hydrolase 5 OS=Homo sapiens OX=9606 GN=USP5 PE=1 SV=2	1	15	15	15	14	14	14	14	14	12	14	14	14	14	14	12	14	14	14	14	14	12	23	23	23	95.785	858	858	0	96.626	By MS/MS	By MS/MS	By MS/MS	By MS/MS	By MS/MS	By MS/MS	21.4	22	22	21.4	21.4	17.9
P45985	P45985	5	5	5	Dual specificity mitogen-activated protein kinase kinase 4	MAP2K4	sp|P45985|MP2K4_HUMAN Dual specificity mitogen-activated protein kinase kinase 4 OS=Homo sapiens OX=9606 GN=MAP2K4 PE=1 SV=1	1	5	5	5	5	4	5	3	5	2	5	4	5	3	5	2	5	4	5	3	5	2	14.5	14.5	14.5	44.287	399	399	0	7.3776	By MS/MS	By MS/MS	By MS/MS	By MS/MS	By MS/MS	By MS/MS	14.5	12	14.5	10	14.5	6.3
P46059	P46059	5	5	5	Solute carrier family 15 member 1	SLC15A1	sp|P46059|S15A1_HUMAN Solute carrier family 15 member 1 OS=Homo sapiens OX=9606 GN=SLC15A1 PE=1 SV=1	1	5	5	5	4	4	5	4	4	3	4	4	5	4	4	3	4	4	5	4	4	3	6.4	6.4	6.4	78.805	708	708	0	13.059	By MS/MS	By MS/MS	By MS/MS	By MS/MS	By MS/MS	By MS/MS	5.4	5.1	6.4	5.1	5.1	4.1
P46108	P46108	8	8	8	Adapter molecule crk	CRK	sp|P46108|CRK_HUMAN Adapter molecule crk OS=Homo sapiens OX=9606 GN=CRK PE=1 SV=2	1	8	8	8	7	6	6	6	6	7	7	6	6	6	6	7	7	6	6	6	6	7	35.9	35.9	35.9	33.83	304	304	0	76.119	By MS/MS	By MS/MS	By MS/MS	By MS/MS	By MS/MS	By MS/MS	30.6	27	25.3	27	27	32.2
P46109	P46109	8	8	8	Crk-like protein	CRKL	sp|P46109|CRKL_HUMAN Crk-like protein OS=Homo sapiens OX=9606 GN=CRKL PE=1 SV=1	1	8	8	8	8	8	8	8	8	8	8	8	8	8	8	8	8	8	8	8	8	8	38.9	38.9	38.9	33.777	303	303	0	53.945	By MS/MS	By MS/MS	By MS/MS	By MS/MS	By MS/MS	By MS/MS	38.9	38.9	38.9	38.9	38.9	38.9
P46459	P46459	18	18	18	Vesicle-fusing ATPase	NSF	sp|P46459|NSF_HUMAN Vesicle-fusing ATPase OS=Homo sapiens OX=9606 GN=NSF PE=1 SV=3	1	18	18	18	13	17	14	14	15	16	13	17	14	14	15	16	13	17	14	14	15	16	27.8	27.8	27.8	82.593	744	744	0	119.1	By MS/MS	By MS/MS	By MS/MS	By MS/MS	By MS/MS	By MS/MS	21.4	26.5	21.5	23.7	25.4	24.3
P46777	P46777	1	1	1	60S ribosomal protein L5	RPL5	sp|P46777|RL5_HUMAN 60S ribosomal protein L5 OS=Homo sapiens OX=9606 GN=RPL5 PE=1 SV=3	1	1	1	1	0	0	1	1	1	1	0	0	1	1	1	1	0	0	1	1	1	1	4	4	4	34.362	297	297	0.0052576	1.7606			By matching	By matching	By MS/MS	By MS/MS	0	0	4	4	4	4
P46926	P46926	6	6	4	Glucosamine-6-phosphate isomerase 1	GNPDA1	sp|P46926|GNPI1_HUMAN Glucosamine-6-phosphate isomerase 1 OS=Homo sapiens OX=9606 GN=GNPDA1 PE=1 SV=1	1	6	6	4	5	5	4	3	3	5	5	5	4	3	3	5	3	4	3	2	1	3	32.2	32.2	22.5	32.668	289	289	0	24.616	By MS/MS	By MS/MS	By MS/MS	By MS/MS	By MS/MS	By MS/MS	22.1	28.4	18.3	14.9	13.8	22.1
P46937	P46937	2	2	2	Transcriptional coactivator YAP1	YAP1	sp|P46937|YAP1_HUMAN Transcriptional coactivator YAP1 OS=Homo sapiens OX=9606 GN=YAP1 PE=1 SV=2	1	2	2	2	2	1	1	2	2	2	2	1	1	2	2	2	2	1	1	2	2	2	6	6	6	54.461	504	504	0.0062543	1.6632	By matching	By matching	By MS/MS	By MS/MS	By MS/MS	By matching	6	3.6	3.6	6	6	6
P46940	P46940	38	38	37	Ras GTPase-activating-like protein IQGAP1	IQGAP1	sp|P46940|IQGA1_HUMAN Ras GTPase-activating-like protein IQGAP1 OS=Homo sapiens OX=9606 GN=IQGAP1 PE=1 SV=1	1	38	38	37	35	36	33	33	32	36	35	36	33	33	32	36	34	35	32	32	31	35	27.9	27.9	27.4	189.25	1657	1657	0	323.31	By MS/MS	By MS/MS	By MS/MS	By MS/MS	By MS/MS	By MS/MS	26.3	27.3	25.1	24.4	25.1	25.6
P46952	P46952	3	3	3	3-hydroxyanthranilate 3,4-dioxygenase	HAAO	sp|P46952|3HAO_HUMAN 3-hydroxyanthranilate 3,4-dioxygenase OS=Homo sapiens OX=9606 GN=HAAO PE=1 SV=2	1	3	3	3	2	2	2	2	2	1	2	2	2	2	2	1	2	2	2	2	2	1	11.2	11.2	11.2	32.556	286	286	0	6.3237	By MS/MS	By MS/MS	By MS/MS	By MS/MS	By MS/MS	By MS/MS	8.4	8.4	8.4	6.6	8.4	3.8
P46976	P46976	2	2	2	Glycogenin-1	GYG1	sp|P46976|GLYG_HUMAN Glycogenin-1 OS=Homo sapiens OX=9606 GN=GYG1 PE=1 SV=4	1	2	2	2	2	2	2	2	2	2	2	2	2	2	2	2	2	2	2	2	2	2	7.4	7.4	7.4	39.383	350	350	0	38.065	By MS/MS	By MS/MS	By MS/MS	By MS/MS	By MS/MS	By MS/MS	7.4	7.4	7.4	7.4	7.4	7.4
P47736	P47736	9	9	9	Rap1 GTPase-activating protein 1	RAP1GAP	sp|P47736|RPGP1_HUMAN Rap1 GTPase-activating protein 1 OS=Homo sapiens OX=9606 GN=RAP1GAP PE=1 SV=2	1	9	9	9	8	8	8	6	5	5	8	8	8	6	5	5	8	8	8	6	5	5	18.7	18.7	18.7	73.361	663	663	0	46.297	By MS/MS	By MS/MS	By MS/MS	By MS/MS	By MS/MS	By MS/MS	16.1	16.4	16.4	11.5	9.7	10.3
P47755	P47755	12	12	10	F-actin-capping protein subunit alpha-2	CAPZA2	sp|P47755|CAZA2_HUMAN F-actin-capping protein subunit alpha-2 OS=Homo sapiens OX=9606 GN=CAPZA2 PE=1 SV=3	1	12	12	10	12	12	11	11	11	12	12	12	11	11	11	12	10	10	9	9	9	10	63.3	63.3	53.8	32.949	286	286	0	314.01	By MS/MS	By MS/MS	By MS/MS	By MS/MS	By MS/MS	By MS/MS	63.3	63.3	62.9	56.3	56.3	63.3
P47756;Q9HD67	P47756	12;1	12;1	12;1	F-actin-capping protein subunit beta	CAPZB	sp|P47756|CAPZB_HUMAN F-actin-capping protein subunit beta OS=Homo sapiens OX=9606 GN=CAPZB PE=1 SV=5	2	12	12	12	11	12	11	10	9	12	11	12	11	10	9	12	11	12	11	10	9	12	46.7	46.7	46.7	30.628	272	272;2058	0	107.5	By MS/MS	By MS/MS	By MS/MS	By MS/MS	By MS/MS	By MS/MS	41.5	46.7	44.1	43.8	38.6	46.7
P47895	P47895	9	8	7	Aldehyde dehydrogenase family 1 member A3	ALDH1A3	sp|P47895|AL1A3_HUMAN Aldehyde dehydrogenase family 1 member A3 OS=Homo sapiens OX=9606 GN=ALDH1A3 PE=1 SV=2	1	9	8	7	9	8	8	8	7	8	8	7	7	7	6	7	7	6	7	6	5	6	20.9	19.3	17.2	56.108	512	512	0	44.698	By MS/MS	By MS/MS	By MS/MS	By MS/MS	By MS/MS	By MS/MS	20.9	18.2	18.8	18.2	15.4	18.2
P47897	P47897	2	2	2	Glutamine--tRNA ligase	QARS	sp|P47897|SYQ_HUMAN Glutamine--tRNA ligase OS=Homo sapiens OX=9606 GN=QARS1 PE=1 SV=1	1	2	2	2	2	1	2	2	2	1	2	1	2	2	2	1	2	1	2	2	2	1	3	3	3	87.798	775	775	0.0011834	2.9801	By MS/MS	By matching	By matching	By MS/MS	By MS/MS	By matching	3	1.8	3	3	3	1.2
P47929	P47929	1	1	1	Galectin-7	LGALS7	sp|P47929|LEG7_HUMAN Galectin-7 OS=Homo sapiens OX=9606 GN=LGALS7 PE=1 SV=2	1	1	1	1	0	0	0	1	1	1	0	0	0	1	1	1	0	0	0	1	1	1	8.1	8.1	8.1	15.075	136	136	0.001142	2.5544				By MS/MS	By MS/MS	By matching	0	0	0	8.1	8.1	8.1
P48029	P48029	7	7	7	Sodium- and chloride-dependent creatine transporter 1	SLC6A8	sp|P48029|SC6A8_HUMAN Sodium- and chloride-dependent creatine transporter 1 OS=Homo sapiens OX=9606 GN=SLC6A8 PE=1 SV=1	1	7	7	7	7	6	6	2	2	4	7	6	6	2	2	4	7	6	6	2	2	4	11.5	11.5	11.5	70.522	635	635	0	19.614	By MS/MS	By MS/MS	By MS/MS	By MS/MS	By MS/MS	By MS/MS	11.5	10.4	10.4	3.6	4.4	8.3
P48048	P48048	1	1	1	ATP-sensitive inward rectifier potassium channel 1	KCNJ1	sp|P48048|KCNJ1_HUMAN ATP-sensitive inward rectifier potassium channel 1 OS=Homo sapiens OX=9606 GN=KCNJ1 PE=1 SV=1	1	1	1	1	1	1	1	1	1	1	1	1	1	1	1	1	1	1	1	1	1	1	4.3	4.3	4.3	44.794	391	391	0	6.9907	By MS/MS	By MS/MS	By MS/MS	By MS/MS	By MS/MS	By MS/MS	4.3	4.3	4.3	4.3	4.3	4.3
P48059;Q7Z4I7	P48059;Q7Z4I7	7;4	7;4	7;4	LIM and senescent cell antigen-like-containing domain protein 1;LIM and senescent cell antigen-like-containing domain protein 2	LIMS1;LIMS2	sp|P48059|LIMS1_HUMAN LIM and senescent cell antigen-like-containing domain protein 1 OS=Homo sapiens OX=9606 GN=LIMS1 PE=1 SV=4;sp|Q7Z4I7|LIMS2_HUMAN LIM and senescent cell antigen-like-containing domain protein 2 OS=Homo sapiens OX=9606 GN=LIMS2 PE=1 SV=	2	7	7	7	6	7	5	6	6	7	6	7	5	6	6	7	6	7	5	6	6	7	22.5	22.5	22.5	37.251	325	325;341	0	14.647	By MS/MS	By MS/MS	By MS/MS	By MS/MS	By MS/MS	By MS/MS	19.4	22.5	18.2	19.4	19.4	22.5
P48065	P48065	2	2	2	Sodium- and chloride-dependent betaine transporter	SLC6A12	sp|P48065|S6A12_HUMAN Sodium- and chloride-dependent betaine transporter OS=Homo sapiens OX=9606 GN=SLC6A12 PE=1 SV=2	1	2	2	2	1	1	2	0	1	1	1	1	2	0	1	1	1	1	2	0	1	1	6.7	6.7	6.7	69.368	614	614	0	4.9128	By MS/MS	By matching	By MS/MS		By matching	By matching	1.8	1.8	6.7	0	1.8	1.8
P48147	P48147	8	8	8	Prolyl endopeptidase	PREP	sp|P48147|PPCE_HUMAN Prolyl endopeptidase OS=Homo sapiens OX=9606 GN=PREP PE=1 SV=2	1	8	8	8	7	8	7	6	6	5	7	8	7	6	6	5	7	8	7	6	6	5	14.9	14.9	14.9	80.699	710	710	0	15.851	By MS/MS	By MS/MS	By MS/MS	By MS/MS	By MS/MS	By MS/MS	13.8	14.9	13.8	11.4	11.5	9.2
P48426;P78356	P48426;P78356	3;3	3;3	3;3	Phosphatidylinositol 5-phosphate 4-kinase type-2 alpha;Phosphatidylinositol 5-phosphate 4-kinase type-2 beta	PIP4K2A;PIP4K2B	sp|P48426|PI42A_HUMAN Phosphatidylinositol 5-phosphate 4-kinase type-2 alpha OS=Homo sapiens OX=9606 GN=PIP4K2A PE=1 SV=2;sp|P78356|PI42B_HUMAN Phosphatidylinositol 5-phosphate 4-kinase type-2 beta OS=Homo sapiens OX=9606 GN=PIP4K2B PE=1 SV=1	2	3	3	3	2	2	3	3	3	3	2	2	3	3	3	3	2	2	3	3	3	3	8.1	8.1	8.1	46.224	406	406;416	0.00080841	3.3354	By MS/MS	By MS/MS	By MS/MS	By MS/MS	By MS/MS	By MS/MS	6.2	3.9	8.1	8.1	8.1	8.1
P48444	P48444	5	5	5	Coatomer subunit delta	ARCN1	sp|P48444|COPD_HUMAN Coatomer subunit delta OS=Homo sapiens OX=9606 GN=ARCN1 PE=1 SV=1	1	5	5	5	5	3	4	3	3	4	5	3	4	3	3	4	5	3	4	3	3	4	11.2	11.2	11.2	57.21	511	511	0	9.7586	By MS/MS	By MS/MS	By MS/MS	By MS/MS	By MS/MS	By MS/MS	11.2	6.1	8.6	6.8	6.5	8.6
P48506	P48506	9	9	9	Glutamate--cysteine ligase catalytic subunit	GCLC	sp|P48506|GSH1_HUMAN Glutamate--cysteine ligase catalytic subunit OS=Homo sapiens OX=9606 GN=GCLC PE=1 SV=2	1	9	9	9	9	8	9	8	9	9	9	8	9	8	9	9	9	8	9	8	9	9	17	17	17	72.765	637	637	0	49.922	By MS/MS	By MS/MS	By MS/MS	By MS/MS	By MS/MS	By MS/MS	17	14.4	17	15.4	17	17
P48507	P48507	3	3	3	Glutamate--cysteine ligase regulatory subunit	GCLM	sp|P48507|GSH0_HUMAN Glutamate--cysteine ligase regulatory subunit OS=Homo sapiens OX=9606 GN=GCLM PE=1 SV=1	1	3	3	3	3	3	3	3	3	3	3	3	3	3	3	3	3	3	3	3	3	3	13.1	13.1	13.1	30.727	274	274	0	7.7586	By MS/MS	By MS/MS	By MS/MS	By MS/MS	By MS/MS	By MS/MS	13.1	13.1	13.1	13.1	13.1	13.1
P48509	P48509	4	4	4	CD151 antigen	CD151	sp|P48509|CD151_HUMAN CD151 antigen OS=Homo sapiens OX=9606 GN=CD151 PE=1 SV=3	1	4	4	4	2	4	3	2	3	3	2	4	3	2	3	3	2	4	3	2	3	3	12.6	12.6	12.6	28.295	253	253	0	14.863	By MS/MS	By MS/MS	By MS/MS	By MS/MS	By MS/MS	By MS/MS	6.3	12.6	9.5	6.3	9.5	9.5
P48556	P48556	2	2	2	26S proteasome non-ATPase regulatory subunit 8	PSMD8	sp|P48556|PSMD8_HUMAN 26S proteasome non-ATPase regulatory subunit 8 OS=Homo sapiens OX=9606 GN=PSMD8 PE=1 SV=2	1	2	2	2	1	2	2	2	1	1	1	2	2	2	1	1	1	2	2	2	1	1	4.9	4.9	4.9	39.611	350	350	0.0052374	1.7288	By MS/MS	By MS/MS	By MS/MS	By MS/MS	By MS/MS	By MS/MS	2.6	4.9	4.9	4.9	2.3	2.3
P48637	P48637	14	14	14	Glutathione synthetase	GSS	sp|P48637|GSHB_HUMAN Glutathione synthetase OS=Homo sapiens OX=9606 GN=GSS PE=1 SV=1	1	14	14	14	14	14	14	13	13	14	14	14	14	13	13	14	14	14	14	13	13	14	33.5	33.5	33.5	52.384	474	474	0	68.183	By MS/MS	By MS/MS	By MS/MS	By MS/MS	By MS/MS	By MS/MS	33.5	33.5	33.5	31.4	31.4	33.5
P48643	P48643	16	16	16	T-complex protein 1 subunit epsilon	CCT5	sp|P48643|TCPE_HUMAN T-complex protein 1 subunit epsilon OS=Homo sapiens OX=9606 GN=CCT5 PE=1 SV=1	1	16	16	16	13	16	14	14	15	15	13	16	14	14	15	15	13	16	14	14	15	15	27.7	27.7	27.7	59.67	541	541	0	31.101	By MS/MS	By MS/MS	By MS/MS	By MS/MS	By MS/MS	By MS/MS	24.4	27.7	24.6	24	26.1	26.1
P48729;Q8N752	P48729	4;1	4;1	4;1	Casein kinase I isoform alpha	CSNK1A1	sp|P48729|KC1A_HUMAN Casein kinase I isoform alpha OS=Homo sapiens OX=9606 GN=CSNK1A1 PE=1 SV=2	2	4	4	4	4	4	4	4	4	3	4	4	4	4	4	3	4	4	4	4	4	3	11.9	11.9	11.9	38.914	337	337;337	0	5.631	By MS/MS	By MS/MS	By MS/MS	By MS/MS	By MS/MS	By MS/MS	11.9	11.9	11.9	11.9	11.9	9.5
P48735	P48735	5	3	3	Isocitrate dehydrogenase [NADP], mitochondrial	IDH2	sp|P48735|IDHP_HUMAN Isocitrate dehydrogenase [NADP], mitochondrial OS=Homo sapiens OX=9606 GN=IDH2 PE=1 SV=2	1	5	3	3	3	4	2	3	4	4	1	2	1	1	2	2	1	2	1	1	2	2	11.1	7.5	7.5	50.909	452	452	0	4.4488	By MS/MS	By MS/MS	By MS/MS	By MS/MS	By MS/MS	By MS/MS	6	8.8	4.4	6	8.2	8.2
P48739	P48739	10	8	8	Phosphatidylinositol transfer protein beta isoform	PITPNB	sp|P48739|PIPNB_HUMAN Phosphatidylinositol transfer protein beta isoform OS=Homo sapiens OX=9606 GN=PITPNB PE=1 SV=2	1	10	8	8	10	10	10	9	9	9	8	8	8	8	8	8	8	8	8	8	8	8	44.6	38.4	38.4	31.54	271	271	0	56.52	By MS/MS	By MS/MS	By MS/MS	By MS/MS	By MS/MS	By MS/MS	44.6	44.6	44.6	41.7	41.7	41.7
P48764	P48764	9	9	9	Sodium/hydrogen exchanger 3	SLC9A3	sp|P48764|SL9A3_HUMAN Sodium/hydrogen exchanger 3 OS=Homo sapiens OX=9606 GN=SLC9A3 PE=1 SV=2	1	9	9	9	7	6	7	8	8	7	7	6	7	8	8	7	7	6	7	8	8	7	14.7	14.7	14.7	92.853	834	834	0	93.382	By MS/MS	By MS/MS	By MS/MS	By MS/MS	By MS/MS	By MS/MS	12.1	8.8	12.1	13.3	13.2	12.1
P49006	P49006	3	3	3	MARCKS-related protein	MARCKSL1	sp|P49006|MRP_HUMAN MARCKS-related protein OS=Homo sapiens OX=9606 GN=MARCKSL1 PE=1 SV=2	1	3	3	3	3	2	2	3	2	2	3	2	2	3	2	2	3	2	2	3	2	2	15.9	15.9	15.9	19.529	195	195	0	28.016	By MS/MS	By MS/MS	By MS/MS	By MS/MS	By MS/MS	By MS/MS	15.9	9.2	9.2	15.9	9.2	9.2
P49184	P49184	1	1	1	Deoxyribonuclease-1-like 1	DNASE1L1	sp|P49184|DNSL1_HUMAN Deoxyribonuclease-1-like 1 OS=Homo sapiens OX=9606 GN=DNASE1L1 PE=1 SV=1	1	1	1	1	1	1	1	1	1	1	1	1	1	1	1	1	1	1	1	1	1	1	5.6	5.6	5.6	33.892	302	302	0	9.0545	By MS/MS	By MS/MS	By MS/MS	By MS/MS	By MS/MS	By MS/MS	5.6	5.6	5.6	5.6	5.6	5.6
P49189	P49189	17	17	17	4-trimethylaminobutyraldehyde dehydrogenase	ALDH9A1	sp|P49189|AL9A1_HUMAN 4-trimethylaminobutyraldehyde dehydrogenase OS=Homo sapiens OX=9606 GN=ALDH9A1 PE=1 SV=3	1	17	17	17	17	16	16	16	17	16	17	16	16	16	17	16	17	16	16	16	17	16	38.1	38.1	38.1	53.801	494	494	0	128.66	By MS/MS	By MS/MS	By MS/MS	By MS/MS	By MS/MS	By MS/MS	38.1	36.4	36.4	36	38.1	36.4
P49221	P49221	22	22	22	Protein-glutamine gamma-glutamyltransferase 4	TGM4	sp|P49221|TGM4_HUMAN Protein-glutamine gamma-glutamyltransferase 4 OS=Homo sapiens OX=9606 GN=TGM4 PE=1 SV=2	1	22	22	22	20	19	21	19	22	19	20	19	21	19	22	19	20	19	21	19	22	19	46.9	46.9	46.9	77.144	684	684	0	323.31	By MS/MS	By MS/MS	By MS/MS	By MS/MS	By MS/MS	By MS/MS	43	41.7	45.9	40.9	46.9	40.6
P49281	P49281	1	1	1	Natural resistance-associated macrophage protein 2	SLC11A2	sp|P49281|NRAM2_HUMAN Natural resistance-associated macrophage protein 2 OS=Homo sapiens OX=9606 GN=SLC11A2 PE=1 SV=2	1	1	1	1	1	1	1	0	0	1	1	1	1	0	0	1	1	1	1	0	0	1	1.4	1.4	1.4	62.265	568	568	0.0011455	2.5739	By MS/MS	By MS/MS	By MS/MS			By matching	1.4	1.4	1.4	0	0	1.4
P49327	P49327	47	47	47	Fatty acid synthase;[Acyl-carrier-protein] S-acetyltransferase;[Acyl-carrier-protein] S-malonyltransferase;3-oxoacyl-[acyl-carrier-protein] synthase;3-oxoacyl-[acyl-carrier-protein] reductase;3-hydroxyacyl-[acyl-carrier-protein] dehydratase;Enoyl-[acyl-carrier-protein] reductase;Oleoyl-[acyl-carrier-protein] hydrolase	FASN	sp|P49327|FAS_HUMAN Fatty acid synthase OS=Homo sapiens OX=9606 GN=FASN PE=1 SV=3	1	47	47	47	42	42	44	43	42	43	42	42	44	43	42	43	42	42	44	43	42	43	24.1	24.1	24.1	273.42	2511	2511	0	271.67	By MS/MS	By MS/MS	By MS/MS	By MS/MS	By MS/MS	By MS/MS	22.6	22.3	23.6	22.7	22.5	22.7
P49354	P49354	2	2	2	Protein farnesyltransferase/geranylgeranyltransferase type-1 subunit alpha	FNTA	sp|P49354|FNTA_HUMAN Protein farnesyltransferase/geranylgeranyltransferase type-1 subunit alpha OS=Homo sapiens OX=9606 GN=FNTA PE=1 SV=1	1	2	2	2	2	1	2	2	2	2	2	1	2	2	2	2	2	1	2	2	2	2	5.3	5.3	5.3	44.408	379	379	0	4.3844	By matching	By MS/MS	By MS/MS	By MS/MS	By MS/MS	By MS/MS	5.3	2.6	5.3	5.3	5.3	5.3
P49368	P49368	13	13	13	T-complex protein 1 subunit gamma	CCT3	sp|P49368|TCPG_HUMAN T-complex protein 1 subunit gamma OS=Homo sapiens OX=9606 GN=CCT3 PE=1 SV=4	1	13	13	13	12	10	12	11	13	11	12	10	12	11	13	11	12	10	12	11	13	11	31.2	31.2	31.2	60.533	545	545	0	56.136	By MS/MS	By MS/MS	By MS/MS	By MS/MS	By MS/MS	By MS/MS	29.2	25.5	29.2	27	31.2	27
P49407	P49407	5	5	5	Beta-arrestin-1	ARRB1	sp|P49407|ARRB1_HUMAN Beta-arrestin-1 OS=Homo sapiens OX=9606 GN=ARRB1 PE=1 SV=2	1	5	5	5	5	3	4	4	4	4	5	3	4	4	4	4	5	3	4	4	4	4	12.9	12.9	12.9	47.065	418	418	0	8.1132	By MS/MS	By MS/MS	By MS/MS	By MS/MS	By MS/MS	By MS/MS	12.9	7.9	9.6	9.6	9.8	9.6
P49419	P49419	19	19	19	Alpha-aminoadipic semialdehyde dehydrogenase	ALDH7A1	sp|P49419|AL7A1_HUMAN Alpha-aminoadipic semialdehyde dehydrogenase OS=Homo sapiens OX=9606 GN=ALDH7A1 PE=1 SV=5	1	19	19	19	18	18	18	18	18	17	18	18	18	18	18	17	18	18	18	18	18	17	39.5	39.5	39.5	58.486	539	539	0	139.73	By MS/MS	By MS/MS	By MS/MS	By MS/MS	By MS/MS	By MS/MS	39.5	39.5	36.4	36.9	39.5	34.7
P49447	P49447	1	1	1	Cytochrome b561	CYB561	sp|P49447|CY561_HUMAN Transmembrane ascorbate-dependent reductase CYB561 OS=Homo sapiens OX=9606 GN=CYB561 PE=1 SV=2	1	1	1	1	1	1	1	1	1	1	1	1	1	1	1	1	1	1	1	1	1	1	6	6	6	27.559	251	251	0	10.447	By MS/MS	By matching	By MS/MS	By MS/MS	By MS/MS	By matching	6	6	6	6	6	6
P49458	P49458	1	1	1	Signal recognition particle 9 kDa protein	SRP9	sp|P49458|SRP09_HUMAN Signal recognition particle 9 kDa protein OS=Homo sapiens OX=9606 GN=SRP9 PE=1 SV=2	1	1	1	1	0	1	1	0	0	0	0	1	1	0	0	0	0	1	1	0	0	0	12.8	12.8	12.8	10.112	86	86	0.0011669	2.7902		By MS/MS	By MS/MS				0	12.8	12.8	0	0	0
P49588	P49588	17	17	17	Alanine--tRNA ligase, cytoplasmic	AARS	sp|P49588|SYAC_HUMAN Alanine--tRNA ligase, cytoplasmic OS=Homo sapiens OX=9606 GN=AARS1 PE=1 SV=2	1	17	17	17	16	16	15	16	14	16	16	16	15	16	14	16	16	16	15	16	14	16	21.6	21.6	21.6	106.81	968	968	0	103.69	By MS/MS	By MS/MS	By MS/MS	By MS/MS	By MS/MS	By MS/MS	19.6	19.6	17.8	20.7	17.9	19.7
P49589	P49589	4	4	4	Cysteine--tRNA ligase, cytoplasmic	CARS	sp|P49589|SYCC_HUMAN Cysteine--tRNA ligase, cytoplasmic OS=Homo sapiens OX=9606 GN=CARS1 PE=1 SV=3	1	4	4	4	3	4	4	4	2	3	3	4	4	4	2	3	3	4	4	4	2	3	7.1	7.1	7.1	85.472	748	748	0	4.43	By matching	By MS/MS	By MS/MS	By MS/MS	By MS/MS	By MS/MS	5.7	7.1	7.1	7.1	3.9	5.7
P49591	P49591	7	7	7	Serine--tRNA ligase, cytoplasmic	SARS	sp|P49591|SYSC_HUMAN Serine--tRNA ligase, cytoplasmic OS=Homo sapiens OX=9606 GN=SARS1 PE=1 SV=3	1	7	7	7	6	6	7	5	6	7	6	6	7	5	6	7	6	6	7	5	6	7	17.5	17.5	17.5	58.777	514	514	0	15.998	By MS/MS	By MS/MS	By MS/MS	By MS/MS	By MS/MS	By MS/MS	12.8	12.8	17.5	10.9	12.8	17.5
P49754	P49754	4	4	4	Vacuolar protein sorting-associated protein 41 homolog	VPS41	sp|P49754|VPS41_HUMAN Vacuolar protein sorting-associated protein 41 homolog OS=Homo sapiens OX=9606 GN=VPS41 PE=1 SV=3	1	4	4	4	3	3	3	1	0	0	3	3	3	1	0	0	3	3	3	1	0	0	5.5	5.5	5.5	98.565	854	854	0.00081334	3.4175	By MS/MS	By matching	By MS/MS	By matching			4.2	4.2	4.2	1.3	0	0
P49755	P49755	1	1	1	Transmembrane emp24 domain-containing protein 10	TMED10	sp|P49755|TMEDA_HUMAN Transmembrane emp24 domain-containing protein 10 OS=Homo sapiens OX=9606 GN=TMED10 PE=1 SV=2	1	1	1	1	1	1	1	1	0	0	1	1	1	1	0	0	1	1	1	1	0	0	4.1	4.1	4.1	24.976	219	219	0.0025575	2.1119	By MS/MS	By matching	By matching	By MS/MS			4.1	4.1	4.1	4.1	0	0
P49757	P49757	2	2	2	Protein numb homolog	NUMB	sp|P49757|NUMB_HUMAN Protein numb homolog OS=Homo sapiens OX=9606 GN=NUMB PE=1 SV=2	1	2	2	2	0	1	1	0	2	0	0	1	1	0	2	0	0	1	1	0	2	0	4.1	4.1	4.1	70.803	651	651	0.00083438	3.7187		By matching	By MS/MS		By MS/MS		0	2.3	2.3	0	4.1	0
P49768	P49768	2	2	2	Presenilin-1;Presenilin-1 NTF subunit;Presenilin-1 CTF subunit;Presenilin-1 CTF12	PSEN1	sp|P49768|PSN1_HUMAN Presenilin-1 OS=Homo sapiens OX=9606 GN=PSEN1 PE=1 SV=1	1	2	2	2	2	2	2	1	2	1	2	2	2	1	2	1	2	2	2	1	2	1	7.5	7.5	7.5	52.667	467	467	0	52.778	By MS/MS	By MS/MS	By MS/MS	By MS/MS	By matching	By MS/MS	7.5	7.5	7.5	4.1	7.5	4.1
P49773	P49773	1	1	1	Histidine triad nucleotide-binding protein 1	HINT1	sp|P49773|HINT1_HUMAN Adenosine 5-monophosphoramidase HINT1 OS=Homo sapiens OX=9606 GN=HINT1 PE=1 SV=2	1	1	1	1	1	1	1	1	1	1	1	1	1	1	1	1	1	1	1	1	1	1	7.1	7.1	7.1	13.802	126	126	0.00086059	4.1609	By MS/MS	By MS/MS	By MS/MS	By MS/MS	By matching	By MS/MS	7.1	7.1	7.1	7.1	7.1	7.1
P49789	P49789	2	2	2	Bis(5-adenosyl)-triphosphatase	FHIT	sp|P49789|FHIT_HUMAN Bis(5-adenosyl)-triphosphatase OS=Homo sapiens OX=9606 GN=FHIT PE=1 SV=3	1	2	2	2	2	2	2	1	2	2	2	2	2	1	2	2	2	2	2	1	2	2	13.6	13.6	13.6	16.858	147	147	0	4.9494	By MS/MS	By MS/MS	By MS/MS	By MS/MS	By MS/MS	By MS/MS	13.6	13.6	13.6	4.8	13.6	13.6
P49795	P49795	3	3	3	Regulator of G-protein signaling 19	RGS19	sp|P49795|RGS19_HUMAN Regulator of G-protein signaling 19 OS=Homo sapiens OX=9606 GN=RGS19 PE=1 SV=1	1	3	3	3	3	3	3	1	1	0	3	3	3	1	1	0	3	3	3	1	1	0	14.7	14.7	14.7	24.635	217	217	0	5.7541	By MS/MS	By MS/MS	By MS/MS	By matching	By matching		14.7	14.7	14.7	3.7	3.7	0
[truncated: 1,767 more rows]
[truncated: 35 more columns]
